# Supplementary material for: PhaLP: A Database for the Study of Phage Lytic Proteins and Their Evolution
Source: MDPI journal article supplement (doi:10.3390/v13071240), 2021-06-26

| # of total hit | accession | custom cluster  |
|----------------|-----------|-----------------|
| 1              | cd17926   | Helicase_ATP-bd |
| 1              | cd18012   | Helicase_ATP-bd |
| 2              | PF00176   | Helicase_ATP-bd |
| 10             | SM00487   | Helicase_ATP-bd |
| 4              | cd18011   | Helicase_ATP-bd |
| 7              | PS51192   | Helicase_ATP-bd |
| 1              | cd17919   | Helicase_ATP-bd |
| 2              | PF04851   | Helicase_ATP-bd |
| 330            | PF01476   | LysM            |
| 332            | cd00118   | LysM            |
| 333            | PS51782   | LysM            |
| 327            | SM00257   | LysM            |
| 46             | cd00599   | GH25            |
| 1              | cd06417   | GH25            |
| 61             | cd06415   | GH25            |
| 4              | cd06414   | GH25            |
| 3              | cd06525   | GH25            |
| 275            | PF01183   | GH25            |
| 207            | SM00641   | GH25            |
| 1              | cd06522   | GH25            |
| 24             | cd06523   | GH25            |
| 20             | PF05036   | SPOR            |
| 16             | PS51724   | SPOR            |
| 194            | SM00646   | Ami_3           |
| 209            | cd02696   | Ami_3           |
| 213            | PF01520   | Ami_3           |
| 4              | PS50222   | EF_HAND_2       |
| 1239           | SM00644   | Ami_2           |
| 202            | SM00701   | Ami_2           |
| 1173           | cd06583   | Ami_2           |
| 1407           | PF01510   | Ami_2           |
| 1              | PF00565   | SNase           |
| 1              | PS50830   | SNase           |
| 1              | SM00318   | SNase           |
| 1              | cd02883   | NUDIX           |
| 1              | PF00293   | NUDIX           |
| 1              | PS51462   | NUDIX           |
| 1              | PF10908   | YkuD            |
| 7              | cd16913   | YkuD            |
| 4              | PF03734   | YkuD            |

|      |         |                    |
|------|---------|--------------------|
| 7    | PS51194 | Helicase_C         |
| 8    | cd18793 | Helicase_C         |
| 4    | SM00490 | Helicase_C         |
| 1    | PS51348 | SLT-related        |
| 12   | cd16899 | SLT-related        |
| 1    | PF00062 | SLT-related        |
| 14   | cd13399 | SLT-related        |
| 14   | cd16896 | SLT-related        |
| 837  | PF01464 | SLT-related        |
| 334  | cd00254 | SLT-related        |
| 46   | cd13401 | SLT-related        |
| 24   | cd01021 | SLT-related        |
| 15   | cd16893 | SLT-related        |
| 91   | cd16894 | SLT-related        |
| 50   | cd13400 | SLT-related        |
| 71   | cd13403 | SLT-related        |
| 182  | cd13925 | SLT-related        |
| 152  | PF06737 | SLT-related        |
| 462  | cd13402 | SLT-related        |
| 232  | PF18013 | SLT-related        |
| 94   | cd14814 | Peptidase_M15      |
| 2    | cd14852 | Peptidase_M15      |
| 47   | PF02557 | Peptidase_M15      |
| 1    | cd14849 | Peptidase_M15      |
| 131  | cd14844 | Peptidase_M15      |
| 156  | PF08291 | Peptidase_M15      |
| 228  | PF06714 | Gp5_OB_N           |
| 179  | cd13926 | GH108              |
| 172  | PF05838 | GH108              |
| 349  | cd00737 | Phage_lysozyme     |
| 1    | cd16904 | pesticin_lyz_like2 |
| 130  | cd00736 | Phage_lysozyme     |
| 282  | cd16900 | Phage_lysozyme     |
| 73   | cd16901 | Phage_lysozyme     |
| 1003 | PF00959 | Phage_lysozyme     |
| 422  | cd00735 | Phage_lysozyme     |
| 3    | PF07669 | MTases             |
| 3    | cd02440 | MTases             |
| 2    | PF05175 | MTases             |
| 21   | cd16891 | LT_GEWL_like       |
| 21   | PF13702 | LT_GEWL_like       |
| 42   | cd00229 | SGNH_hydro         |
| 42   | PF13472 | SGNH_hydro         |
| 2    | PF02368 | Big_2              |

|     |         |                           |
|-----|---------|---------------------------|
| 4   | SM00635 | Big_2                     |
| 136 | PF08230 | CPL7                      |
| 136 | SM01095 | CPL7                      |
| 7   | cd00978 | GH46                      |
| 7   | PF01374 | GH46                      |
| 6   | cd16902 | Pesticin_C                |
| 6   | PF16754 | Pesticin_C                |
| 473 | cd00325 | GH19                      |
| 202 | PF00182 | GH19                      |
| 380 | cd14845 | Peptidase_M15             |
| 428 | PF13539 | Peptidase_M15             |
| 14  | cd14667 | 3D                        |
| 7   | PF06725 | 3D                        |
| 1   | cd14688 | bZIP_YAP                  |
| 31  | PF13884 | S74_ICA                   |
| 43  | PS51688 | S74_ICA                   |
| 70  | cd06503 | ATP-synt_Fo_b             |
| 2   | cd18586 | ABC_6TM_PrtD_like         |
| 1   | cd18577 | ABC_6TM_Pgp_ABCB1_D1_like |
| 1   | cd18028 | Helicase_ATP-bd           |
| 1   | cd17504 | MFS_MMR_MDR_like          |
| 3   | cd17477 | MFS_YcaD_like             |
| 1   | cd17330 | MFS_SLC46_TetA_like       |
| 1   | cd17324 | MFS_NepI_like             |
| 2   | cd17321 | MFS_MMR_MDR_like          |
| 1   | cd17040 | Ubl_MoaD_like             |
| 7   | cd17320 | MFS_MdfA_MDR_like         |
| 12  | cd14830 | Delta_COP_N               |
| 1   | cd08173 | Gro1PDH                   |
| 2   | cd06180 | MFS_YjiJ                  |
| 3   | cd06174 | MFS                       |
| 3   | cd06173 | MFS_MefA_like             |
| 1   | cd04631 | CBS_archAMPK_gamma-repeat |
| 1   | cd02775 | MopB_CT                   |
| 8   | cd00890 | Prefoldin                 |
| 1   | cd00063 | FN3                       |
| 1   | cd00442 | Lyz_like                  |
| 1   | PS51272 | SLH                       |
| 1   | PS50861 | AA_TRNA_LIGASE_II_GLYAB   |
| 1   | PS51186 | GNAT                      |
| 4   | PS50853 | FN3                       |
| 1   | PS50817 | INTEIN_N_TER              |
| 8   | PS50163 | RECA_3                    |
| 7   | PF18858 | LPD39                     |

|     |         |                           |
|-----|---------|---------------------------|
| 5   | PF18857 | LPD38                     |
| 2   | PF18853 | LPD37                     |
| 3   | PF18823 | InPase                    |
| 2   | PF18809 | PBECR1                    |
| 1   | PF18760 | ART-PolyVal               |
| 5   | PF18798 | LPD3                      |
| 17  | PF18341 | PSA_CBD                   |
| 1   | PF17969 | Ldt_C                     |
| 3   | PF16838 | Caud_tail_N               |
| 186 | PF16775 | ZoocinA_TRD               |
| 8   | PF15711 | ILEI                      |
| 3   | PF13810 | DUF4185                   |
| 1   | PF13751 | DDE_Tnp_1_6               |
| 1   | PF13550 | Phage-tail_3              |
| 1   | PF13385 | Laminin_G_3               |
| 156 | PF13529 | Peptidase_C39_2           |
| 1   | PF13365 | Trypsin_2                 |
| 1   | PF13354 | Beta-lactamase2           |
| 1   | PF13199 | Glyco_hydro_66            |
| 19  | PF12385 | Peptidase_C70             |
| 6   | PF12200 | DUF3597                   |
| 31  | PF12123 | Amidase02_C               |
| 90  | PF11860 | Muramidase                |
| 2   | PF11650 | Tail_accessory_Gp4        |
| 214 | PF10145 | Phage_tape_meas           |
| 37  | PF10464 | Peptidase_U40             |
| 2   | PF09718 | Phage_lambda_GpH_tape_mea |
| 6   | PF09588 | YqaJ                      |
| 157 | PF09374 | PG_3                      |
| 23  | PF08924 | DUF1906                   |
| 1   | PF08481 | GBS_Bsp-like              |
| 220 | PF08310 | LGFP                      |
| 31  | PF07902 | Gp58                      |
| 1   | PF07833 | Cu_amine_oxidN1           |
| 1   | PF06832 | BiPBP_C                   |
| 32  | PF07486 | Hydrolase_2               |
| 1   | PF02384 | N6_Mtase                  |
| 2   | PF02018 | CBM_4_9                   |
| 1   | PF01664 | Reo_sigma1                |
| 339 | PF01471 | PG_1                      |
| 36  | PF01391 | Collagen                  |
| 1   | PF01129 | ART                       |
| 1   | PF00912 | Transgly                  |
| 1   | PF00905 | Transpeptidase            |

|     |         |                        |
|-----|---------|------------------------|
| 1   | PF00395 | SLH                    |
| 1   | PF00753 | Lactamase_B            |
| 6   | PF06791 | TMP_2                  |
| 230 | PF06715 | Gp5_C                  |
| 1   | PF05598 | Transposase_Insh_N     |
| 4   | PF05435 | DNA_terminal_Gp3       |
| 231 | PF05382 | Ami_5                  |
| 1   | PF05203 | Hom_end_hint           |
| 1   | PF05106 | Phage_lambda_GpS_holin |
| 1   | PF04965 | IraD/Gp25-like         |
| 2   | PF03330 | RlpA-like_DPBB         |
| 1   | PF04466 | Terminase_L_N          |
| 84  | PS50249 | MPN                    |
| 77  | SM00232 | MPN                    |
| 185 | cd08073 | MPN                    |
| 183 | PF14464 | MPN                    |
| 469 | PF00877 | NLPC_P60               |
| 499 | PF01551 | Peptidase_M23          |
| 548 | PF01473 | CW                     |
| 662 | PS51170 | CW                     |
| 23  | PS51257 | PROKAR_LIPOPROTEIN     |
| 403 | PF01832 | Glucosaminidase        |
| 371 | SM00047 | Glucosaminidase        |
| 32  | PF08239 | SH3                    |
| 321 | PF08460 | SH3                    |
| 155 | PS51781 | SH3                    |
| 290 | SM00287 | SH3                    |
| 634 | PF05257 | CHAP                   |
| 657 | PS50911 | CHAP                   |

accession - [InterPro name - source db name]

average fraction of the overl

|                                                                      | cd17926 | cd18012 | PF00176 | SM00487 | cd18011 | PS51192 | cd17919 | PF04851 |
|----------------------------------------------------------------------|---------|---------|---------|---------|---------|---------|---------|---------|
| cd17926- [DEXH-box helicase domain of DEAD-like helicase restrict    | 1       |         |         | 0       |         | 0       |         |         |
| cd18012- [DEAQ-box helicase domain of archaeal and bacterial SNF     |         | 1       | 0       | 0       |         |         |         |         |
| PF00176- [SNF2-related, N-terminal domain (SNF2_N) - SNF2 family     |         | 0       | 1       | 1       | 1       | 1       |         |         |
| SM00487- [Helicase superfamily 1/2, ATP-binding domain (Helicase     | 0       | 0       | 1       | 1       | 1       | 1       | 0       | 1       |
| cd18011- [DEXH-box helicase domain of RapA (DEXDc_RapA)]             |         |         | 1       | 1       | 1       | 1       |         | 1       |
| PS51192- [Helicase superfamily 1/2, ATP-binding domain (Helicase     | 0       |         | 1       | 1       | 1       | 1       | 0       | 1       |
| cd17919- [DEXH/Q-box helicase domain of DEAD-like helicase Snf f     |         |         |         | 0       |         | 0       | 1       | 1       |
| PF04851- [Helicase/UvrB, N-terminal (Helicase/UvrB_N) - Type III re  |         |         |         | 1       | 1       | 1       | 1       | 1       |
| PF01476- [LysM domain (LysM_dom) - LysM domain (LysM)]               |         |         |         |         |         |         |         |         |
| cd00118- [LysM domain (LysM_dom) - Lysin Motif is a small domain     |         |         |         |         |         |         |         |         |
| PS51782- [LysM domain (LysM_dom) - LysM domain profile (LYSM)        |         |         |         |         |         |         |         |         |
| SM00257- [LysM domain (LysM_dom) - Lysin motif (LysM)]               |         |         |         |         |         |         |         |         |
| cd00599- [Endo-N-acetylmuramidases (muramidases) are lysozyme        |         |         |         |         |         |         |         |         |
| cd06417- [LysA is a cell wall endolysin produced by Lactobacillus fe |         |         |         |         |         |         |         |         |
| cd06415- [Cpl-1 lysin (also known as Cpl-9 lysozyme / muramidase)    |         |         |         |         |         |         |         |         |
| cd06414- [The LytC lysozyme of Streptococcus pneumoniae is a bac     |         |         |         |         |         |         |         |         |
| cd06525- [Lyc muramidase is an autolytic lysozyme (autolysin) from   |         |         |         |         |         |         |         |         |
| PF01183- [Glycoside hydrolase, family 25 (Glyco_hydro_25) - Glyco    |         |         |         |         |         |         |         |         |
| SM00641- [Glycoside hydrolase, family 25 subgroup (Glyco_hydro_      |         |         |         |         |         |         |         |         |
| cd06522- [AtIA is an autolysin found in Gram-positive lactic acid ba |         |         |         |         |         |         |         |         |
| cd06523- [PlyB is a bacteriophage endolysin that displays potent ly  |         |         |         |         |         |         |         |         |
| PF05036- [Sporulation-like domain (SPOR-like_dom) - Sporulation r    |         |         |         |         |         |         |         |         |
| PS51724- [Sporulation-like domain (SPOR-like_dom) - SPOR domain      |         |         |         |         |         |         |         |         |
| SM00646- [N-acetylmuramoyl-L-alanine amidase, catalytic domain       |         |         |         |         |         |         |         |         |
| cd02696- [N-acetylmuramoyl-L-alanine amidase, catalytic domain (     |         |         |         |         |         |         |         |         |
| PF01520- [N-acetylmuramoyl-L-alanine amidase, catalytic domain (     |         |         |         |         |         |         |         |         |
| PS50222- [EF-hand domain (EF_hand_dom) - EF-hand calcium-bind        |         |         |         |         |         |         |         |         |
| SM00644- [N-acetylmuramoyl-L-alanine amidase domain (Amidase         |         |         |         |         |         |         |         |         |
| SM00701- [Peptidoglycan recognition protein family domain, meta      |         |         |         |         |         |         |         |         |
| cd06583- [N-acetylmuramoyl-L-alanine amidase domain (Amidase_        |         |         |         |         |         |         |         |         |
| PF01510- [N-acetylmuramoyl-L-alanine amidase domain (Amidase_        |         |         |         |         |         |         |         |         |
| PF00565- [Staphylococcal nuclease (SNase-like), OB-fold (Staphyloc   |         |         |         |         |         |         |         |         |
| PS50830- [Staphylococcal nuclease (SNase-like), OB-fold (Staphyloc   |         |         |         |         |         |         |         |         |
| SM00318- [Staphylococcal nuclease (SNase-like), OB-fold (Staphylo    |         |         |         |         |         |         |         |         |
| cd02883- [Nudix hydrolase is a superfamily of enzymes found in all   |         |         |         |         |         |         |         |         |
| PF00293- [NUDIX hydrolase domain (NUDIX_hydrolase_dom) - NUD         |         |         |         |         |         |         |         |         |
| PS51462- [NUDIX hydrolase domain (NUDIX_hydrolase_dom) - Nuc         |         |         |         |         |         |         |         |         |
| PF10908- [Protein of unknown function DUF2778 (DUF2778) - Prot       |         |         |         |         |         |         |         |         |
| cd16913- [L,D-transpeptidases/carboxypeptidases similar to Bacillu   |         |         |         |         |         |         |         |         |
| PF03734- [L,D-transpeptidase catalytic domain (LD_TPept_cat_dom      |         |         |         |         |         |         |         |         |

PS51194- [Helicase, C-terminal (Helicase\_C) - Superfamilies 1 and 2  
cd18793- [C-terminal helicase domain of the SNF family helicases (S  
SM00490- [Helicase, C-terminal (Helicase\_C) - helicase superfamily  
PS51348- [Glycoside hydrolase, family 22 (Glyco\_hydro\_22) - Alpha  
cd16899- [C-type invertebrate lysozyme (LYZ\_C\_invert)]  
PF00062- [Glycoside hydrolase, family 22 (Glyco\_hydro\_22) - C-type  
cd13399- [Slit35-like lytic transglycosylase (Slit35\_like)]  
cd16896- [Uncharacterized lytic transglycosylase subfamily with sim  
PF01464- [Transglycosylase SLT domain 1 (Transglycosylase\_SLT\_do  
cd00254- [Lytic transglycosylase (LT) and goose egg-white lysozyme  
cd13401- [70kDa soluble lytic transglycosylase (Slit70) and similar p  
cd01021- [Goose egg-white lysozyme (GEWL)]  
cd16893- [Membrane-bound lytic murein transglycosylases MltC and  
cd16894- [Membrane-bound lytic murein transglycosylase D and sim  
cd13400- [IagB-like protein (LT\_lagB\_like)]  
cd13403- [Membrane-bound lytic murein transglycosylase F (MLTF  
cd13925- [Core lysozyme-like domain of resuscitation-promoting fa  
PF06737- [Transglycosylase-like (Transglycosylas) - Transglycosylase  
cd13402- [lytic transglycosylase-like domain of tail fiber-like protein  
PF18013- [Phage tail lysozyme (Phage\_lysozyme2) - Phage tail lysoz  
cd14814- [Metalloproteases including zinc D-Ala-D-Ala carboxypep  
cd14852- [L,D-carboxypeptidase DacB and LdcB, and related protei  
PF02557- [Peptidase M15B (Pept\_M15B) - D-alanyl-D-alanine carbo  
cd14849- [D-Ala-D-Ala dipeptidase/D-Ala-D-Ala carboxypeptidase (C  
cd14844- [Proteins similar to the zinc-containing D-Ala-D-Ala dipep  
PF08291- [Peptidase M15A, C-terminal (Peptidase\_M15A\_C) - Pept  
PF06714- [Protein Gp5, N-terminal OB-fold domain (Gp5\_OB\_N) - C  
cd13926- [N-acetylmuramidase domain of the glycosyl hydrolase 10  
PF05838- [Protein of unknown function DUF847 (DUF847) - Glycosy  
cd00737- [Endolysin/autolysin (Endolysin\_autolysin) - endolysin an  
cd16904- [pesticin C-terminal-like domain of uncharacterized prote  
cd00736- [Bacteriophage lambda lysozyme and similar proteins (lar  
cd16900- [endolysin R21-like proteins (endolysin\_R21\_like)]  
cd16901- [P1 lysozyme Lyz-like proteins (lyz\_P1)]  
PF00959- [Glycoside hydrolase, family 24 (Glyco\_hydro\_24) - Phage  
cd00735- [Bacteriophage T4-like lysozymes (T4\_like\_lys)]  
PF07669- [Restriction modification methylase Eco57I (RM\_methyla  
cd02440- [S-adenosylmethionine-dependent methyltransferases (S  
PF05175- [Methyltransferase small domain (Small\_mtfrase\_dom) -  
cd16891- [CwlT-like N-terminal lysozyme domain and similar doma  
PF13702- [Lysozyme-like (Lysozyme\_like)]  
cd00229- [SGNH\_hydrolase, or GDSL\_hydrolase, is a diverse family  
PF13472- [SGNH hydrolase-type esterase domain (SGNH\_hydro) - C  
PF02368- [Bacterial Ig-like, group 2 (Big\_2) - Bacterial Ig-like domain

SM00635- [Bacterial Ig-like, group 2 (Big\_2) - Bacterial Ig-like domain  
PF08230- [Cpl-7 lysozyme, C-terminal (Cpl\_7\_lyso\_C) - CW\_7 repeat  
SM01095- [Cpl-7 lysozyme, C-terminal (Cpl\_7\_lyso\_C) - Cpl-7 lysozyme  
cd00978- [Glycoside hydrolase, family 46 (Glyco\_hydro\_46) - chitinase  
PF01374- [Glycoside hydrolase, family 46 (Glyco\_hydro\_46) - Glycoside  
cd16902- [Lysozyme-like C-terminal domain of pesticin (pesticin\_lyz  
PF16754- [Bacterial toxin homologue of phage lysozyme, C-terminal  
cd00325- [Glycoside hydrolase family 19, chitinase domain (chitinase  
PF00182- [Glycoside hydrolase, family 19, catalytic (Glyco\_hydro\_1  
cd14845- [L-Ala-D-Glu peptidase, also known as L-alanyl-D-glutamate  
PF13539- [Peptidase M15C (Peptidase\_M15C) - D-alanyl-D-alanine  
cd14667- [Non-mltA associated 3D domain containing proteins, non-  
PF06725- [3D domain (3D\_dom) - 3D domain (3D)]  
cd14688- [Basic leucine zipper (bZIP) domain of Yeast Activator Protein  
PF13884- [Intramolecular chaperone auto-processing domain (S74\_1  
PS51688- [Intramolecular chaperone auto-processing domain (S74\_1  
cd06503- [F-type ATP synthase, membrane subunit b (ATP-synt\_Fo  
cd18586- [Six-transmembrane helical domain (6TM) domain of the  
cd18577- [Six-transmembrane helical domain 1 (TMD1) of P-glycoprotein  
cd18028- [DEXH-box helicase domain of archaeal Ski2-type helicase  
cd17504- [Methylenomycin A resistance protein (also called MMR)  
cd17477- [YcaD and similar transporters of the Major Facilitator Superfamily  
cd17330- [Eukaryotic Solute carrier 46 (SLC46) family, Bacterial TetR  
cd17324- [Purine ribonucleoside efflux pump NepI and similar transporters  
cd17321- [Methylenomycin A resistance protein (also called MMR)  
cd17040- [ubiquitin-like (Ubl) domain found in a group of small sulfotransferases  
cd17320- [Multidrug transporter MdfA and similar multidrug resistance  
cd14830- [delta subunit of the F-COPI complex, N-terminal domain  
cd08173- [Sn-glycerol-1-phosphate dehydrogenase (Gro1PDH) catalytic  
cd06180- [Uncharacterized protein YjiI and similar proteins of the MFS  
cd06174- [Major Facilitator Superfamily (MFS)]  
cd06173- [Macrolide efflux protein A and similar proteins of the MFS  
cd04631- [CBS pair domains found in archeal 5'-AMP-activated protein kinase  
cd02775- [Molybdopterin-Binding, C-terminal (MopB\_CT) domain of molybdo-  
cd00890- [Prefoldin is a hexameric molecular chaperone complex, formed by  
cd00063- [Fibronectin type III (FN3\_dom) - Fibronectin type 3 domain  
cd00442- [Lysozyme-like domains (Lyz\_like)]  
PS51272- [S-layer homology domain (SLH\_dom) - S-layer homology domain  
PS50861- [Glycine-tRNA synthetase, heterodimeric (Gly-tRNA-synthetase  
PS51186- [GNAT domain (GNAT\_dom) - Gcn5-related N-acetyltransferase  
PS50853- [Fibronectin type III (FN3\_dom) - Fibronectin type-III domain  
PS50817- [Intein N-terminal splicing region (Intein\_N) - Intein N-terminal  
PS50163- [DNA recombination and repair protein RecA, monomeric  
PF18858- [Large polyvalent protein-associated domain 39 (LPD39) -

PF18857- [Large polyvalent protein associated domain 38 (LPD38) -  
 PF18853- [Large polyvalent protein associated domain 37 (LPD37) -  
 PF18823- [Inorganic pyrophosphatase domain (Inorganic\_Pase) - In  
 PF18809- [Phage-Barnase-EndoU-ColicinE5/D-ReLE-like nuclease (P  
 PF18760- [ADP-Ribosyltransferase in polyvalent proteins (ART-Poly  
 PF18798- [Large polyvalent protein-associated domain 3 (LPD3) - La  
 PF18341- [PSA endolysin, cell wall binding domain (PSA\_CBD) - PSA  
 PF17969- [L,D-transpeptidase C-terminal domain (Ldt\_C) - L,D-trans  
 PF16838- [Distal tube protein, N-terminal (Caud\_tail\_N) - Caudovir  
 PF16775- [Lytic exoenzyme, target recognition domain (ZoocinA\_TI  
 PF15711- [ILEI/PANDER domain (ILEI/PANDER\_dom) - Interleukin-li  
 PF13810- [Domain of unknown function DUF4185 (DUF4185) - Don  
 PF13751- [Transposase DDE domain (Tnp\_DDE\_dom) - Transposase  
 PF13550- [Tip attachment protein J (J\_dom) - Putative phage tail pr  
 PF13385- [Concanavalin A-like lectin/glucanases superfamily (Lamin  
 PF13529- [Peptidase C39-like (Peptidase\_C39-like) - Peptidase\_C39  
 PF13365- [Trypsin-like peptidase domain (Trypsin\_2)]  
 PF13354- [Beta-lactamase enzyme family (Beta-lactamase2)]  
 PF13199- [Glycosyl hydrolase family 66 (Glyco\_hydro\_66) - Glycosy  
 PF12385- [Peptidase C70, AvrRpt2 (Peptidase\_C70\_AvrRpt2) - Papa  
 PF12200- [Domain of unknown function DUF3597 (DUF3597) - Don  
 PF12123- [N-acetylmuramoyl-L-alanine amidase (Amidase02\_C) - N  
 PF11860- [N-acetylmuramidase (Muramidase) - N-acetylmuramidase  
 PF11650- [Tail accessory factor GP4 (Tail\_accessory\_Gp4) - P22 tail  
 PF10145- [Phage tail tape measure protein (Phage\_tape\_meas) - Pl  
 PF10464- [Peptidase U40 (Peptidase\_U40) - Peptidase U40 (Peptid  
 PF09718- [Bacteriophage lambda, GpH, tail tape measure, C-termir  
 PF09588- [Yqaj viral recombinase (Yqaj\_viral\_recombinase) - Yqaj-  
 PF09374- [Peptidoglycan binding domain (Peptidoglycan-bd\_3) - Pr  
 PF08924- [Protein of unknown function DUF1906 (DUF1906) - Dom  
 PF08481- [GBS Bsp-like (GBS\_Bsp-like) - GBS Bsp-like repeat (GBS\_B  
 PF08310- [LGFP (LGFP) - LGFP repeat (LGFP)]  
 PF07902- [Gp58-like (Gp58) - gp58-like protein (Gp58)]  
 PF07833- [Copper amine oxidase-like, N-terminal (Cu\_amine\_oxida  
 PF06832- [Penicillin-binding, C-terminal (PBP\_C) - Penicillin-Binding  
 PF07486- [Cell wall hydrolase, SleB (Cell\_wall\_hydrolase\_SleB) - Ce  
 PF02384- [DNA methylase, adenine-specific (DNA\_methylase\_A-5)]  
 PF02018- [Carbohydrate-binding, CenC-like (CenC\_carb-bd) - Carbo  
 PF01664- [Viral attachment sigma 1, reoviral (Vir\_attach\_sigma1\_r  
 PF01471- [Peptidoglycan binding-like (Peptidoglycan-bd-like) - Puta  
 PF01391- [Collagen triple helix repeat (Collagen) - Collagen triple h  
 PF01129- [NAD:arginine ADP-ribosyltransferase, ART (ART) - NAD:a  
 PF00912- [Glycosyl transferase, family 51 (Glyco\_trans\_51) - Transg  
 PF00905- [Penicillin-binding protein, transpeptidase (PCN-bd\_Tpep

PF00395- [S-layer homology domain (SLH\_dom) - S-layer homology  
PF00753- [Metallo-beta-lactamase (Metallo-B-lactamas) - Metallo-  
PF06791- [Bacteriophage lambda, GpH, tail tape measure, N-termi  
PF06715- [Gp5, C-terminal (Gp5\_C) - Gp5 C-terminal repeat (3 copi  
PF05598- [Transposase InsH, N-terminal (Transposase\_InsH\_N) - Tr  
PF05435- [DNA terminal protein Gp3 (DNA\_terminal\_Gp3) - Phi-29  
PF05382- [Bacteriophage lysin (Phage\_lysin) - Bacteriophage peptid  
PF05203- [Hom-end-associated Hint (Hom\_end\_hint) - Hom\_end-a  
PF05106- [Bacteriophage lambda, GpS, holin (Phage\_lambda\_GpS\_  
PF04965- [IraD/Gp25-like (IraD/Gp25-like) - Gene 25-like lysozyme  
PF03330- [RlpA-like protein, double-psi beta-barrel domain (RlpA-li  
PF04466- [Phage terminase large subunit, N-terminal (Terminase\_L  
PS50249- [MPN domain (MPN) - MPN domain profile (MPN)]  
SM00232- [JAB1/MPN/MOV34 metalloenzyme domain (JAMM/MP  
cd08073- [Mpr1p, Pad1p N-terminal (MPN) domains with catalytic  
PF14464- [JAB domain, prokaryotic (JAB\_dom\_prok) - Prokaryotic h  
PF00877- [Endopeptidase, NLPC/P60 domain (NLP\_P60\_dom) - Nlp  
PF01551- [Peptidase M23 (Peptidase\_M23) - Peptidase family M23  
PF01473- [Cell wall/choline-binding repeat (Cell\_wall/Cho-bd\_repe  
PS51170- [Cell wall/choline-binding repeat (Cell\_wall/Cho-bd\_repe  
PS51257- [Prokaryotic membrane lipoprotein lipid attachment site  
PF01832- [Mannosyl-glycoprotein endo-beta-N-acetylglucosamidas  
SM00047- [Mannosyl-glycoprotein endo-beta-N-acetylglucosamida  
PF08239- [SH3-like domain, bacterial-type (SH3-like\_bac-type) - Ba  
PF08460- [SH3-like domain, bacterial-type (SH3-like\_bac-type) - Ba  
PS51781- [SH3-like domain, bacterial-type (SH3-like\_bac-type) - SH  
SM00287- [SH3-like domain, bacterial-type (SH3-like\_bac-type) - Ba  
PF05257- [CHAP domain (CHAP\_dom) - CHAP domain (CHAP)]  
PS50911- [CHAP domain (CHAP\_dom) - CHAP domain profile (CHAP

ap (average fraction between overlapping section en length of largest domain)

[illegible]

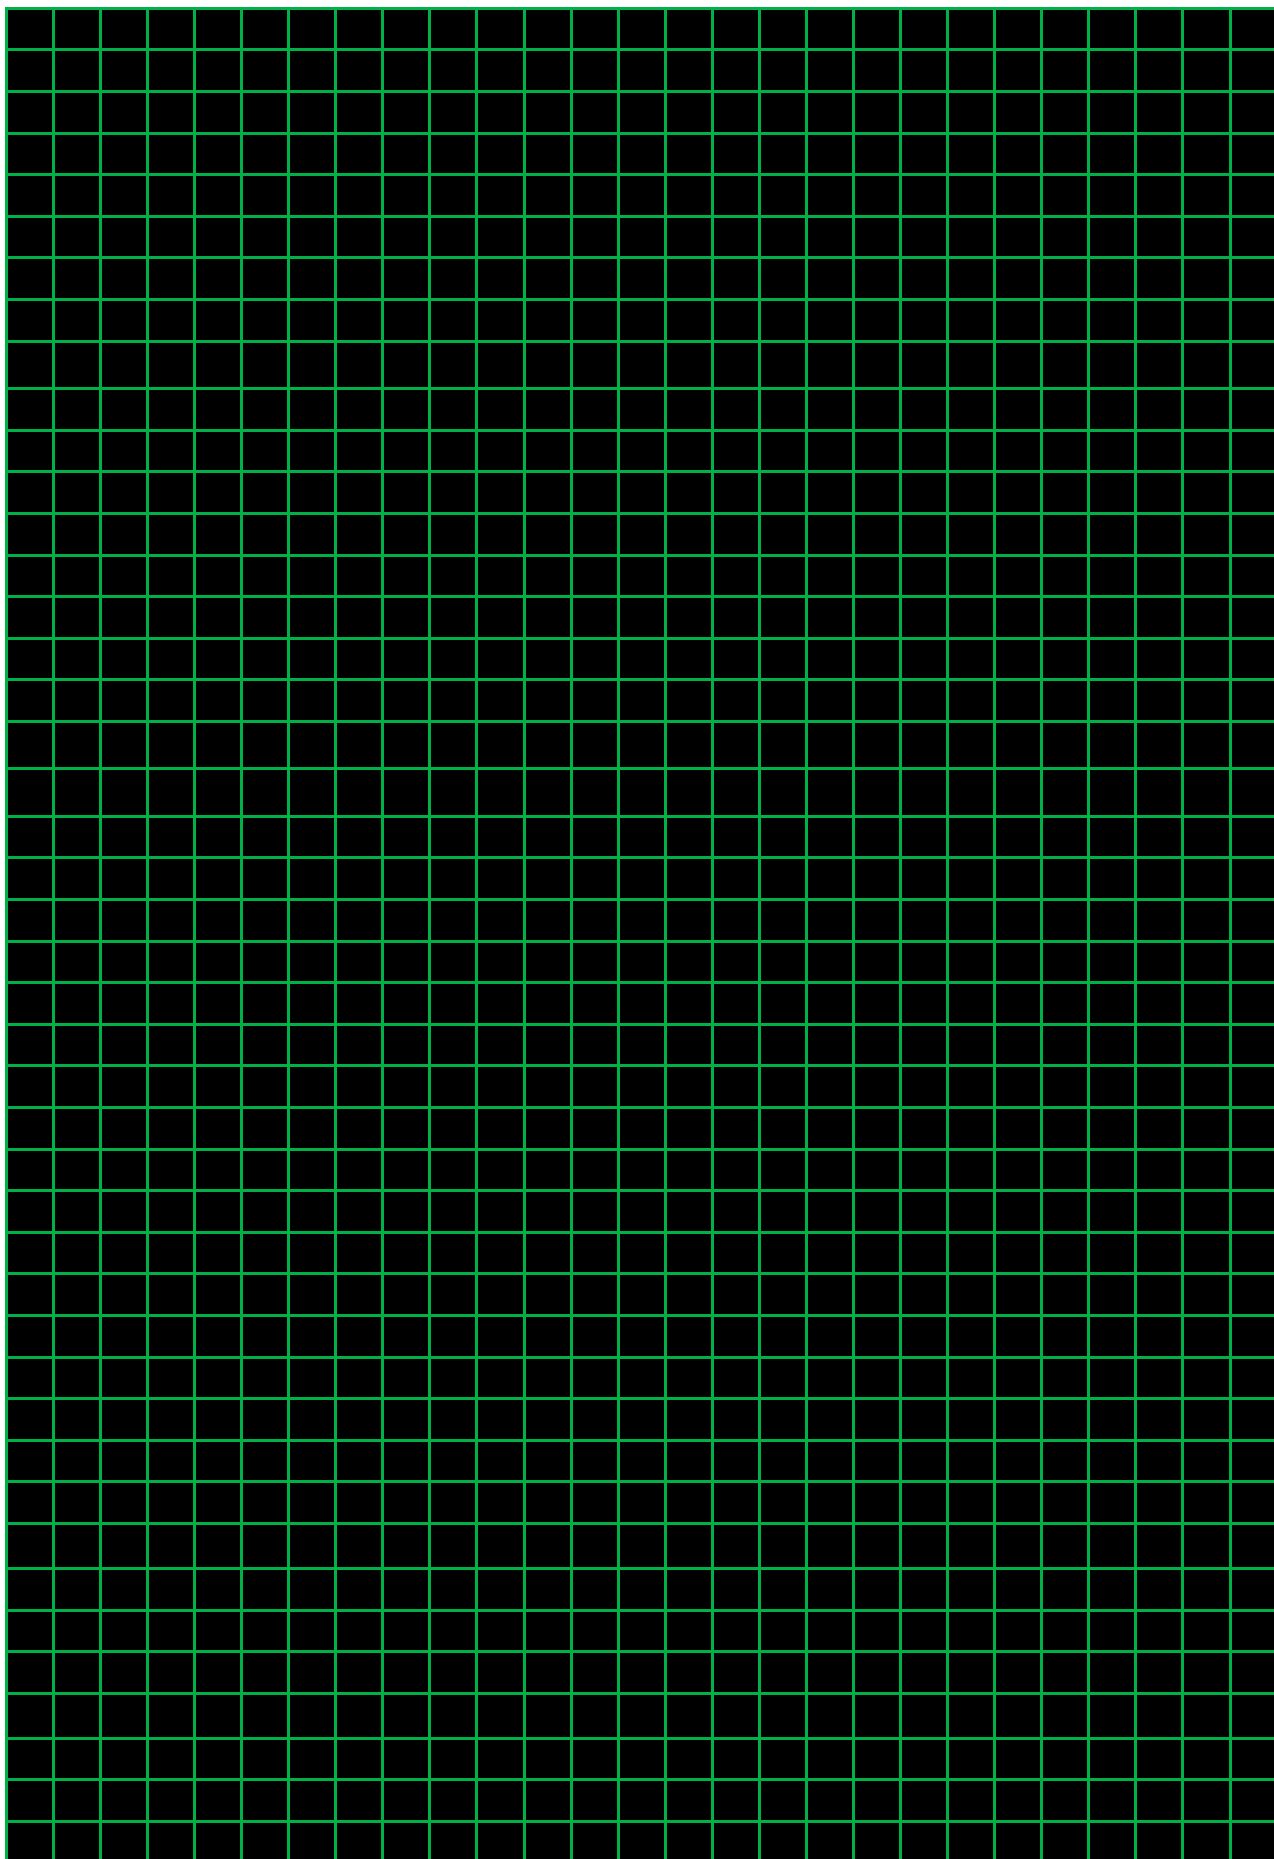

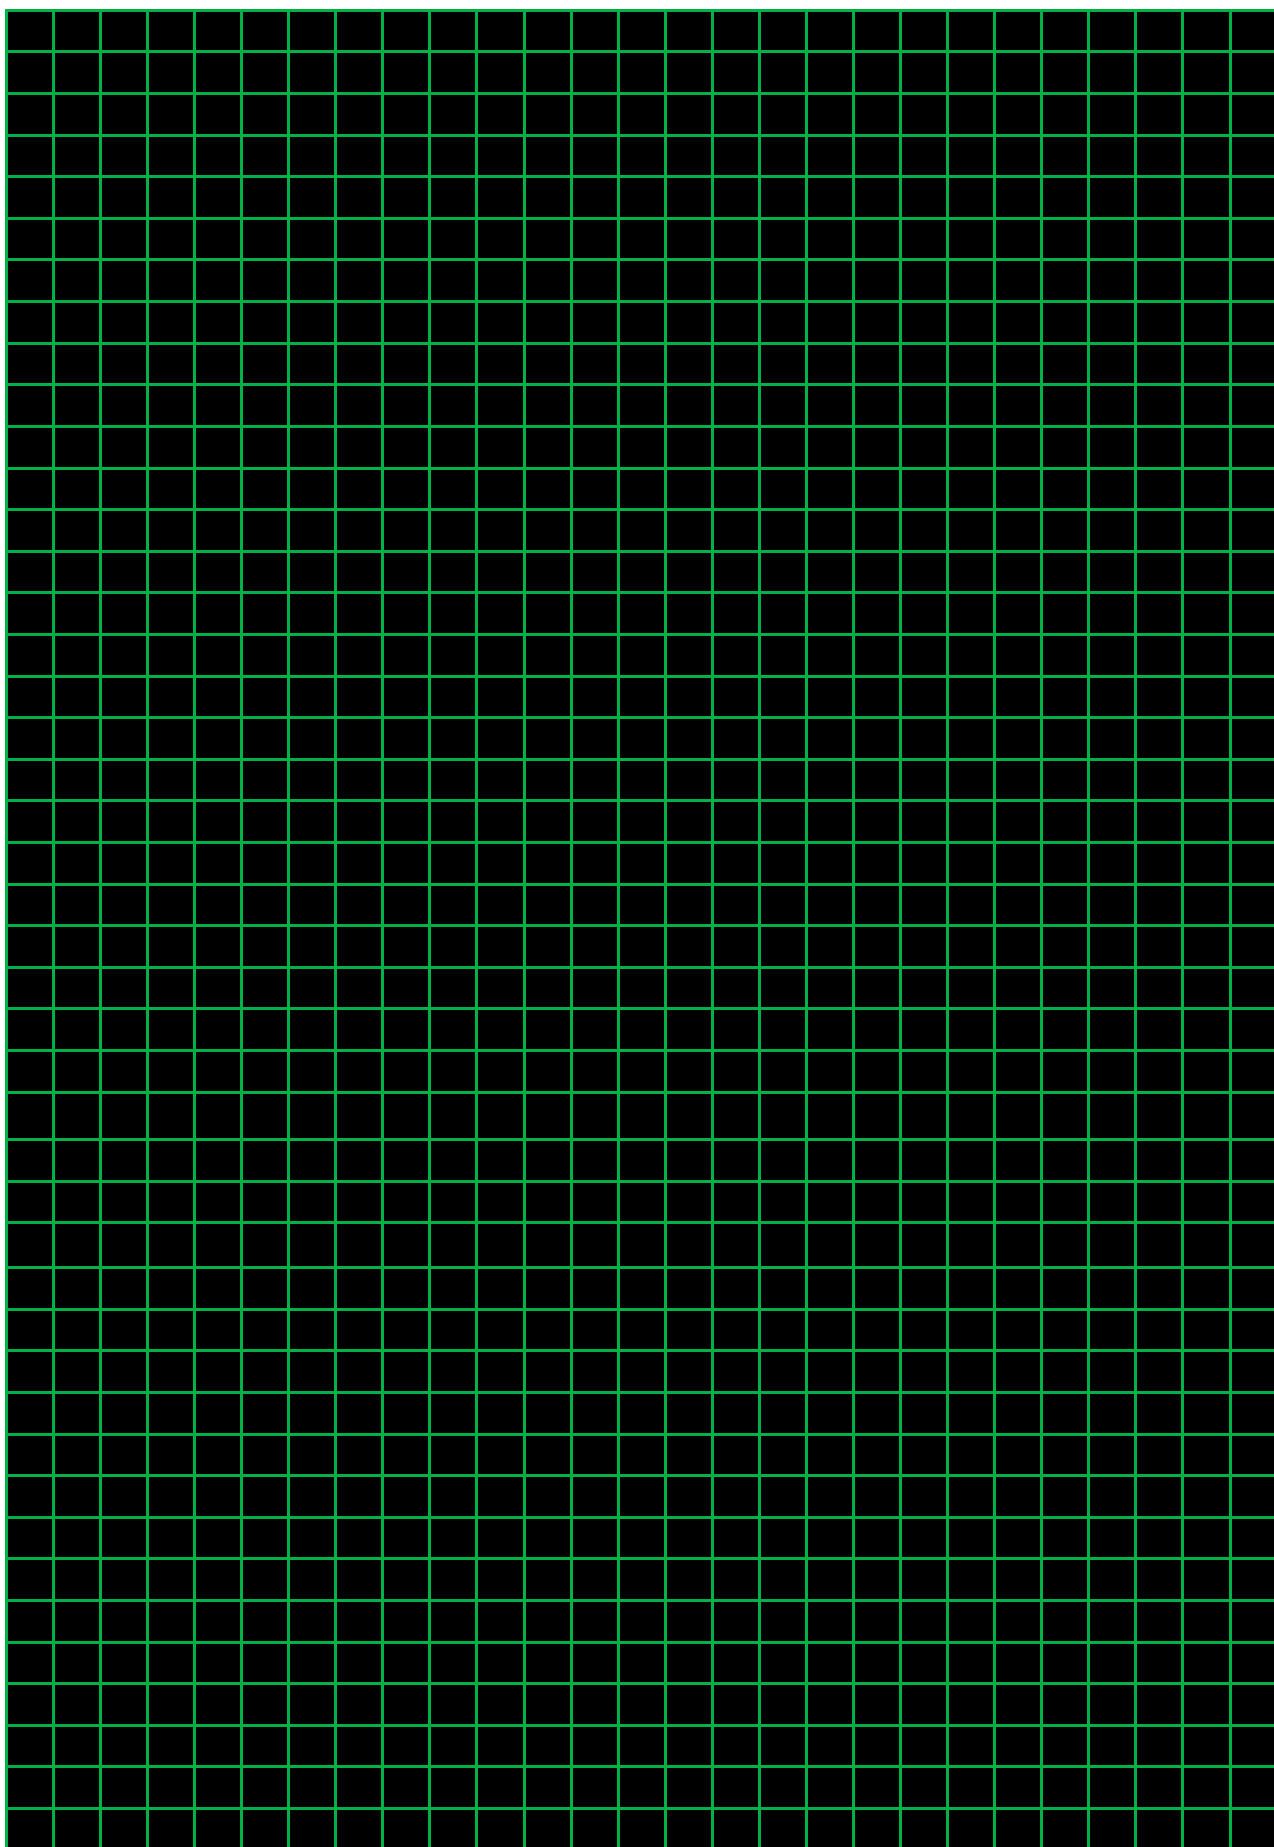

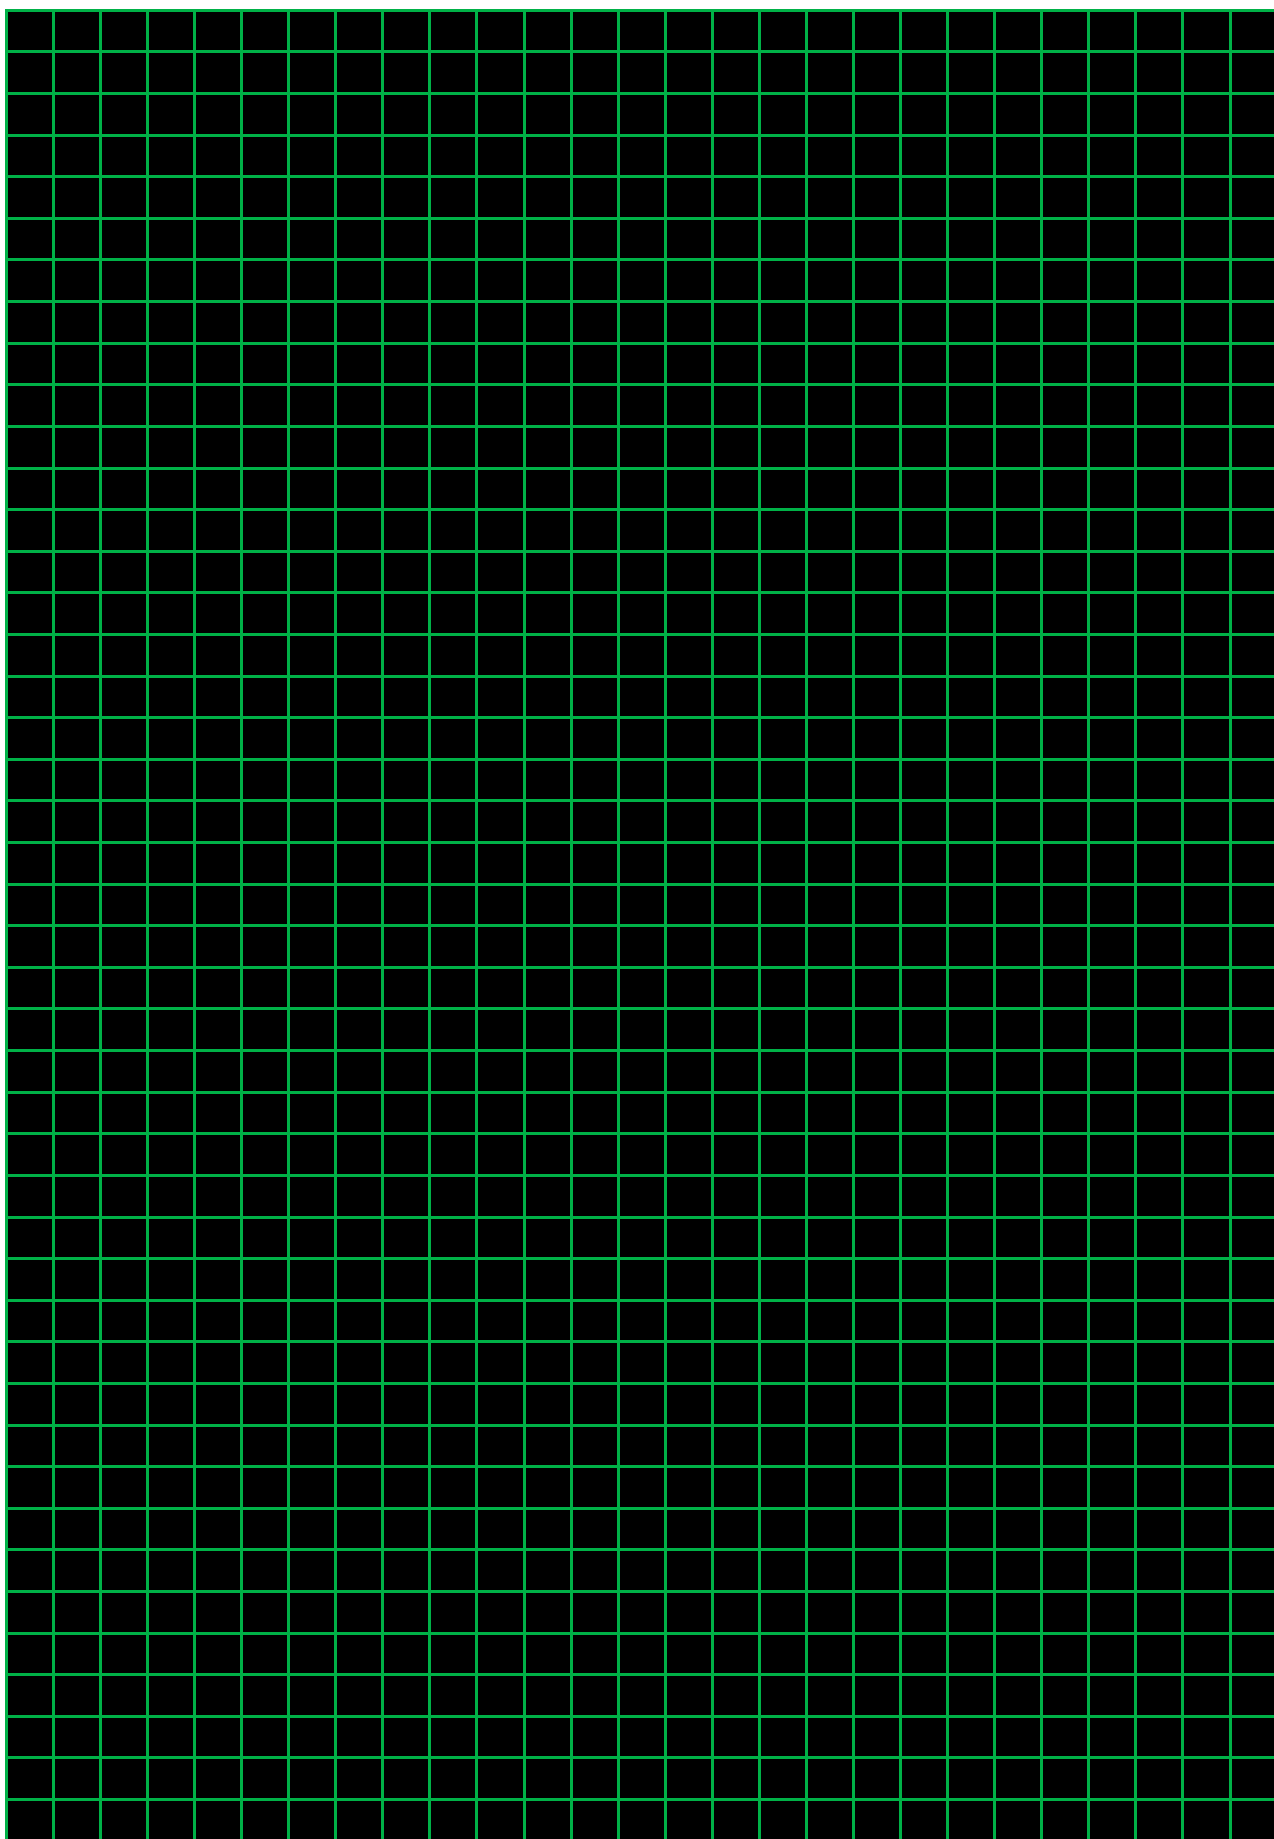

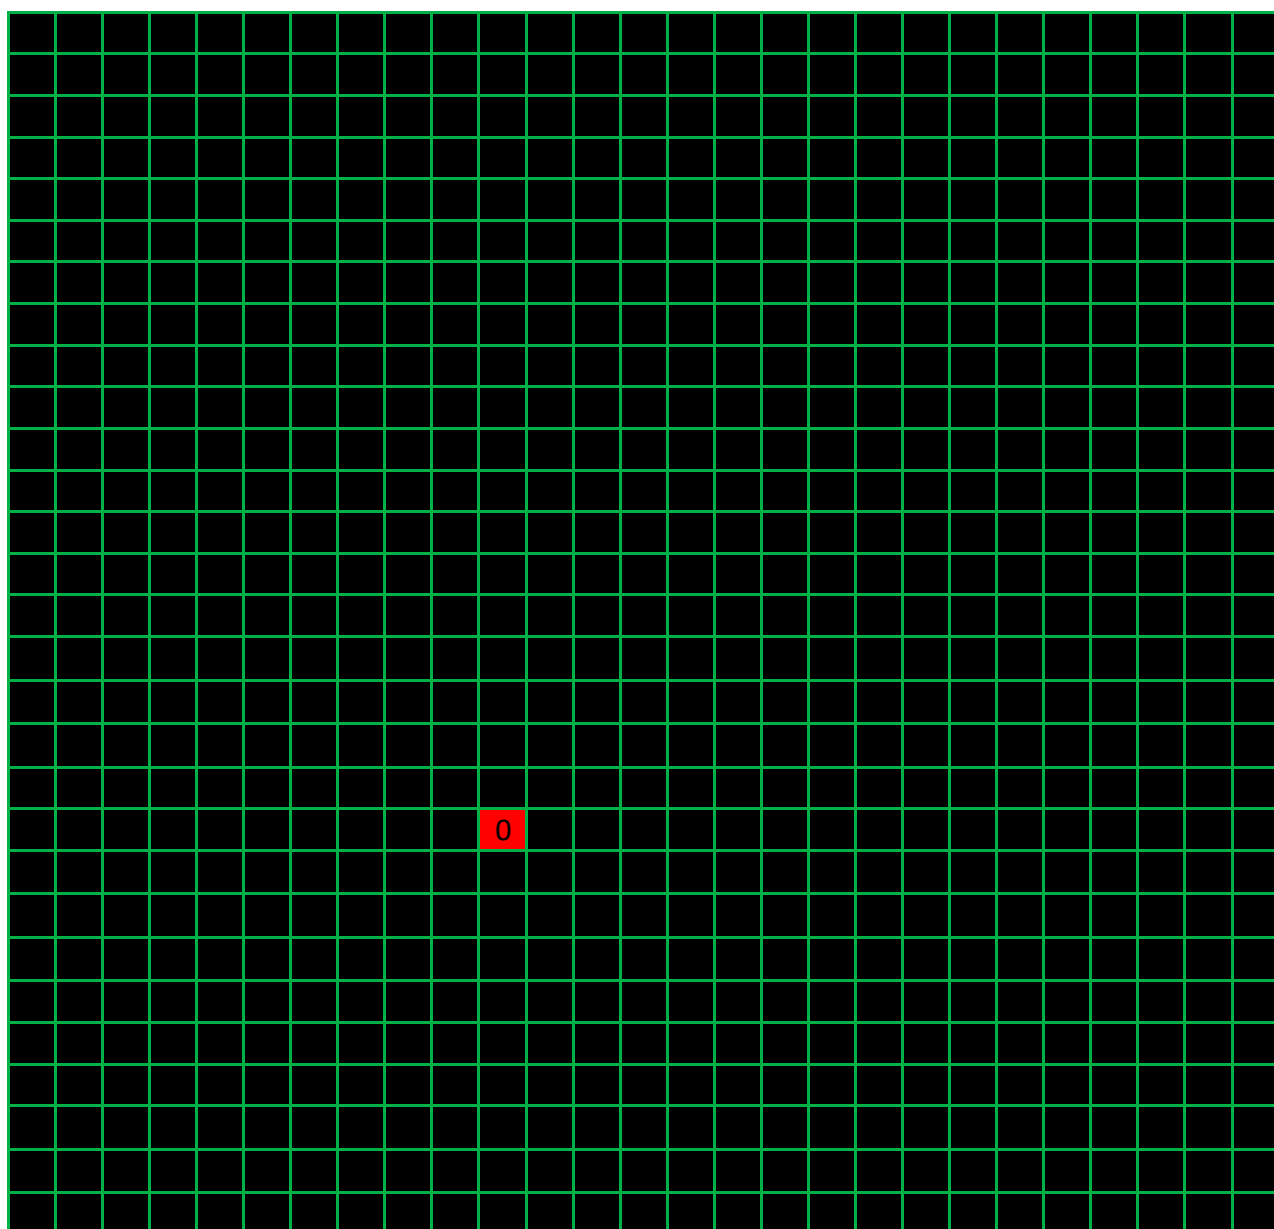

[illegible]

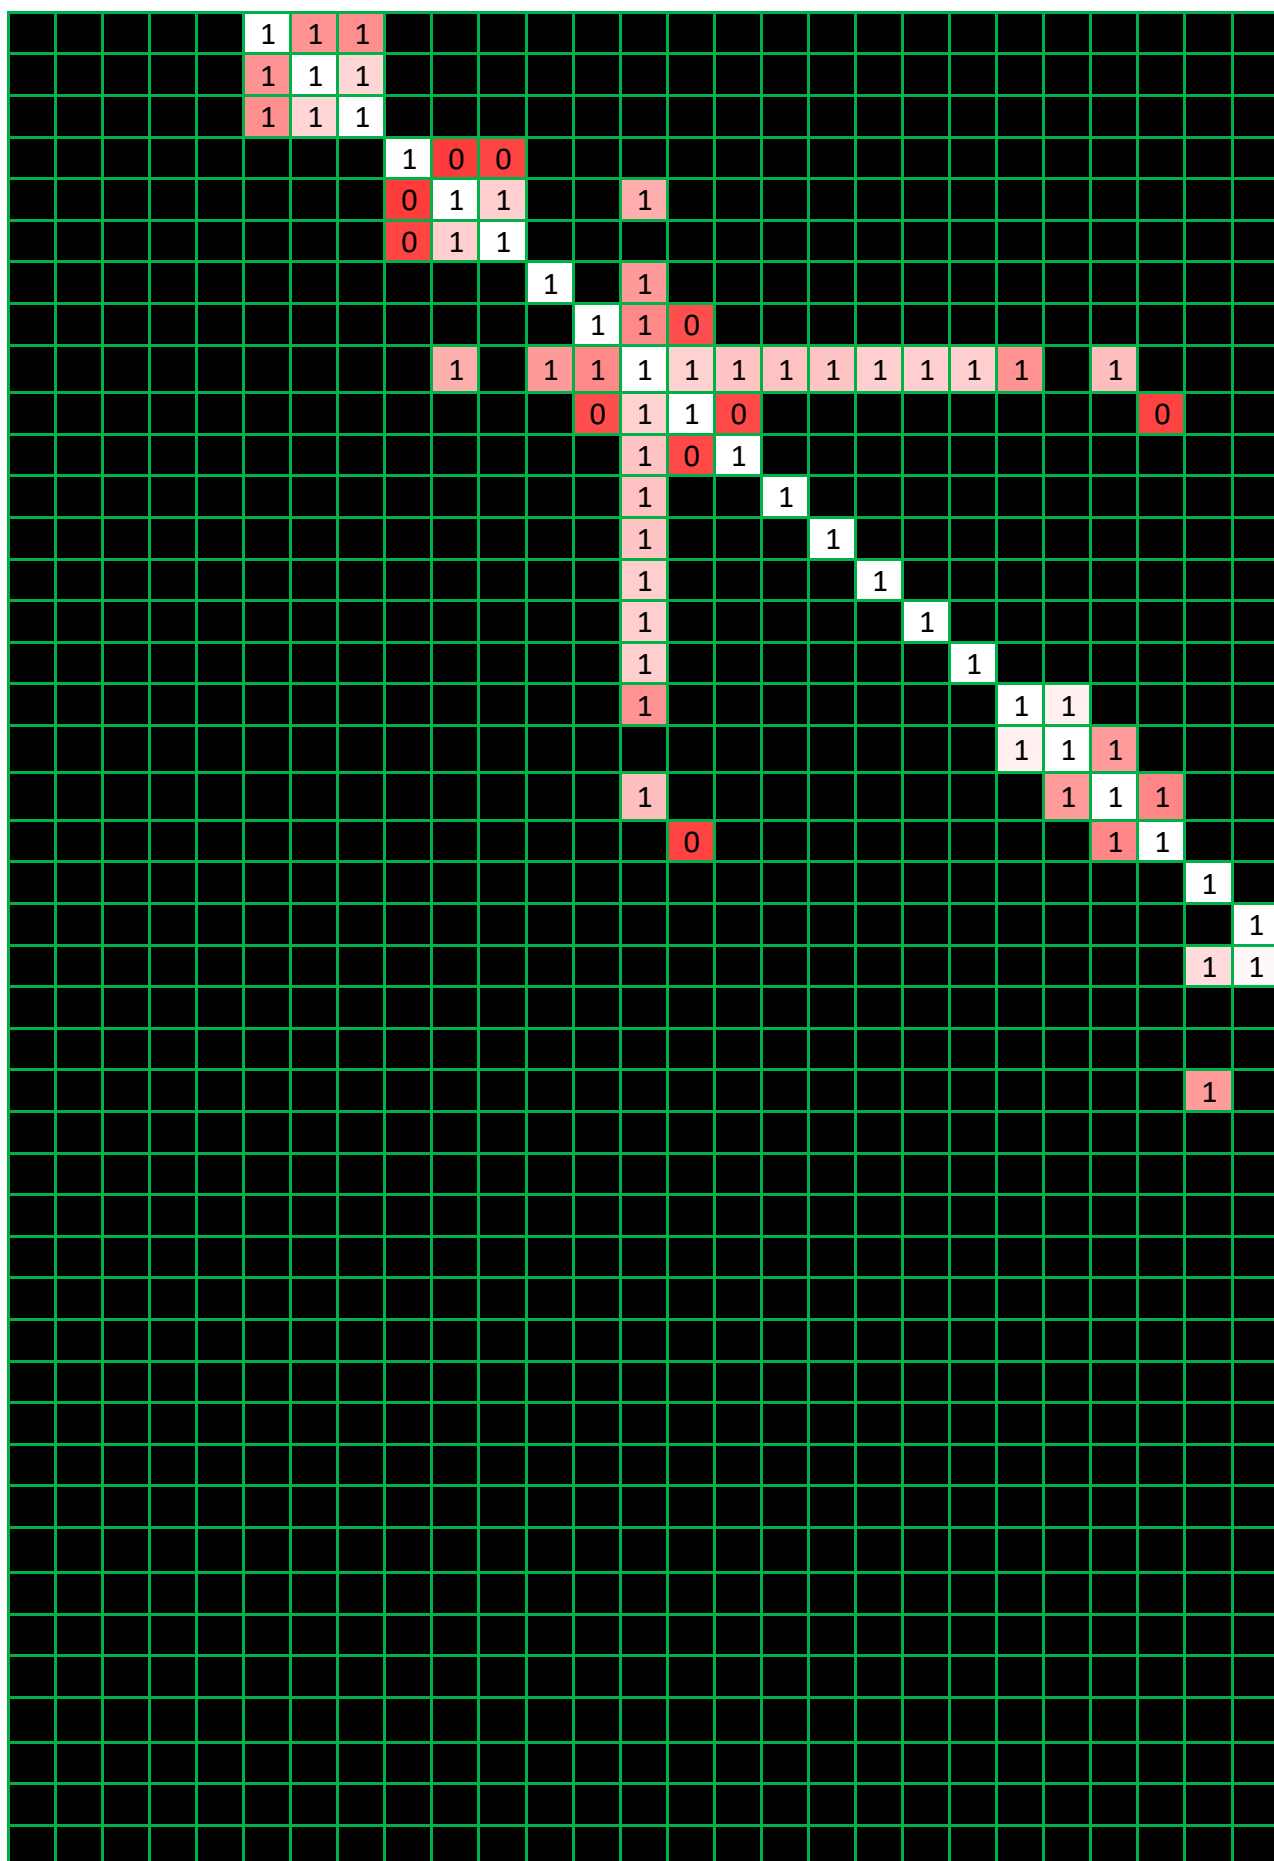





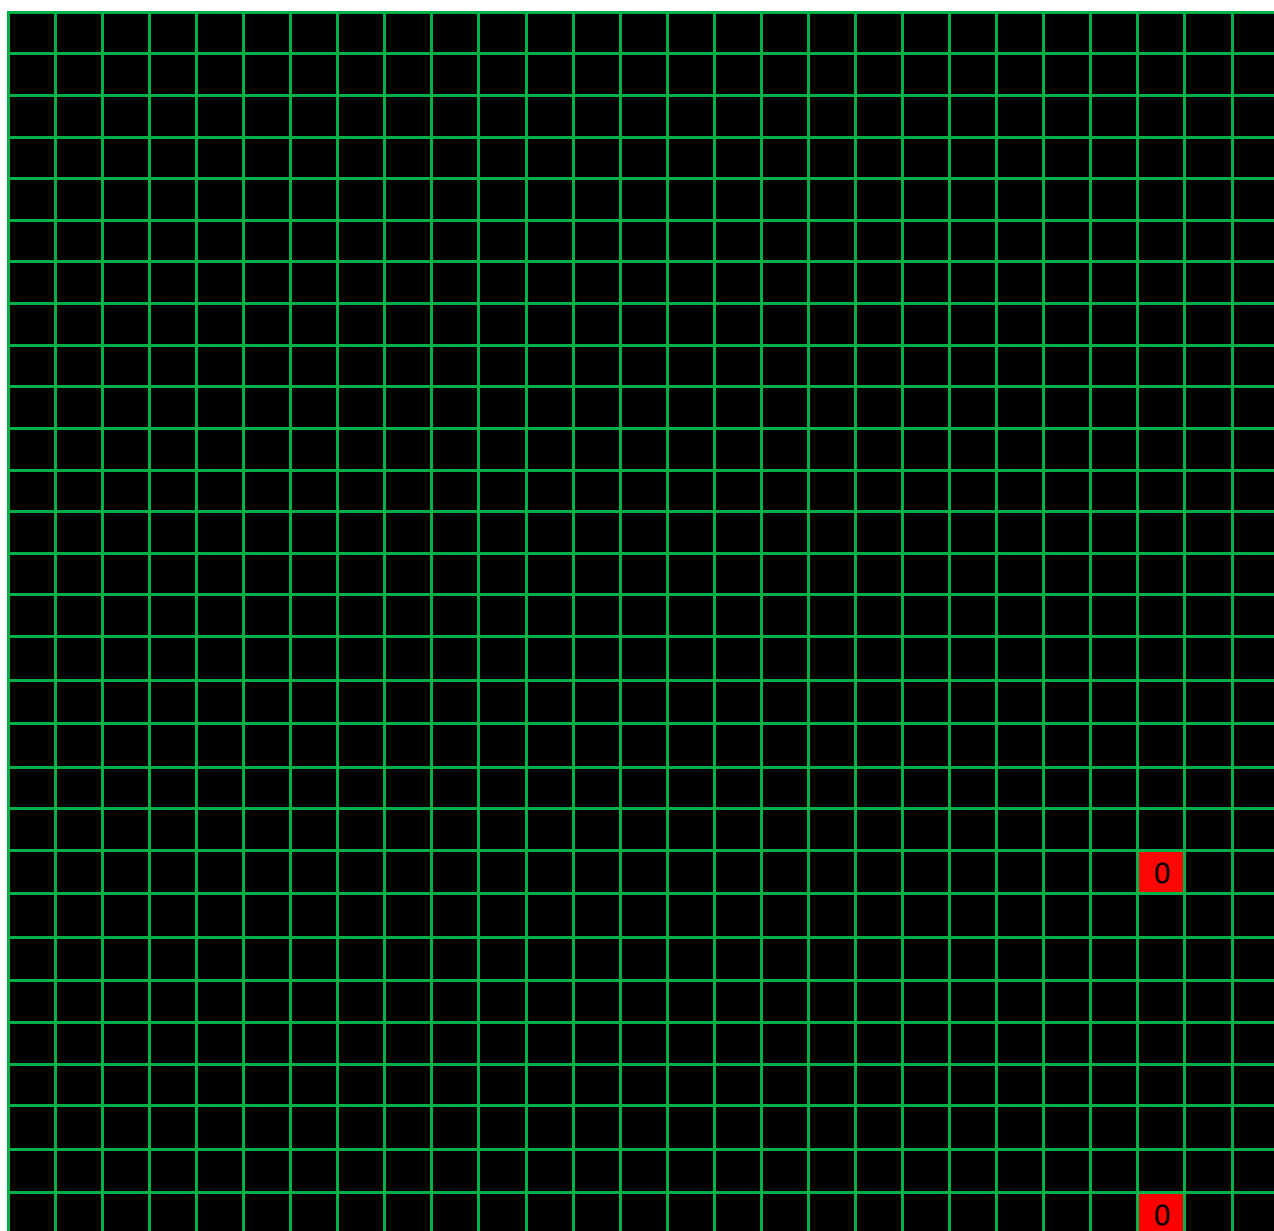

|         |         |         |         |         |         |         |         |         |         |         |         |         |         |         |         |         |         |         |         |         |         |         |         |         |
|---------|---------|---------|---------|---------|---------|---------|---------|---------|---------|---------|---------|---------|---------|---------|---------|---------|---------|---------|---------|---------|---------|---------|---------|---------|
| cd16902 | cd00978 | SM01095 | SM00635 | PF02368 | PF13472 | cd00229 | PF13702 | cd16891 | PF05175 | cd02440 | PF07669 | cd00735 | cd16901 | cd16900 | cd00736 | cd16904 | cd00737 | PF05838 | cd13926 | PF06714 | PF08291 | cd14844 | cd14849 | PF02557 |
|---------|---------|---------|---------|---------|---------|---------|---------|---------|---------|---------|---------|---------|---------|---------|---------|---------|---------|---------|---------|---------|---------|---------|---------|---------|

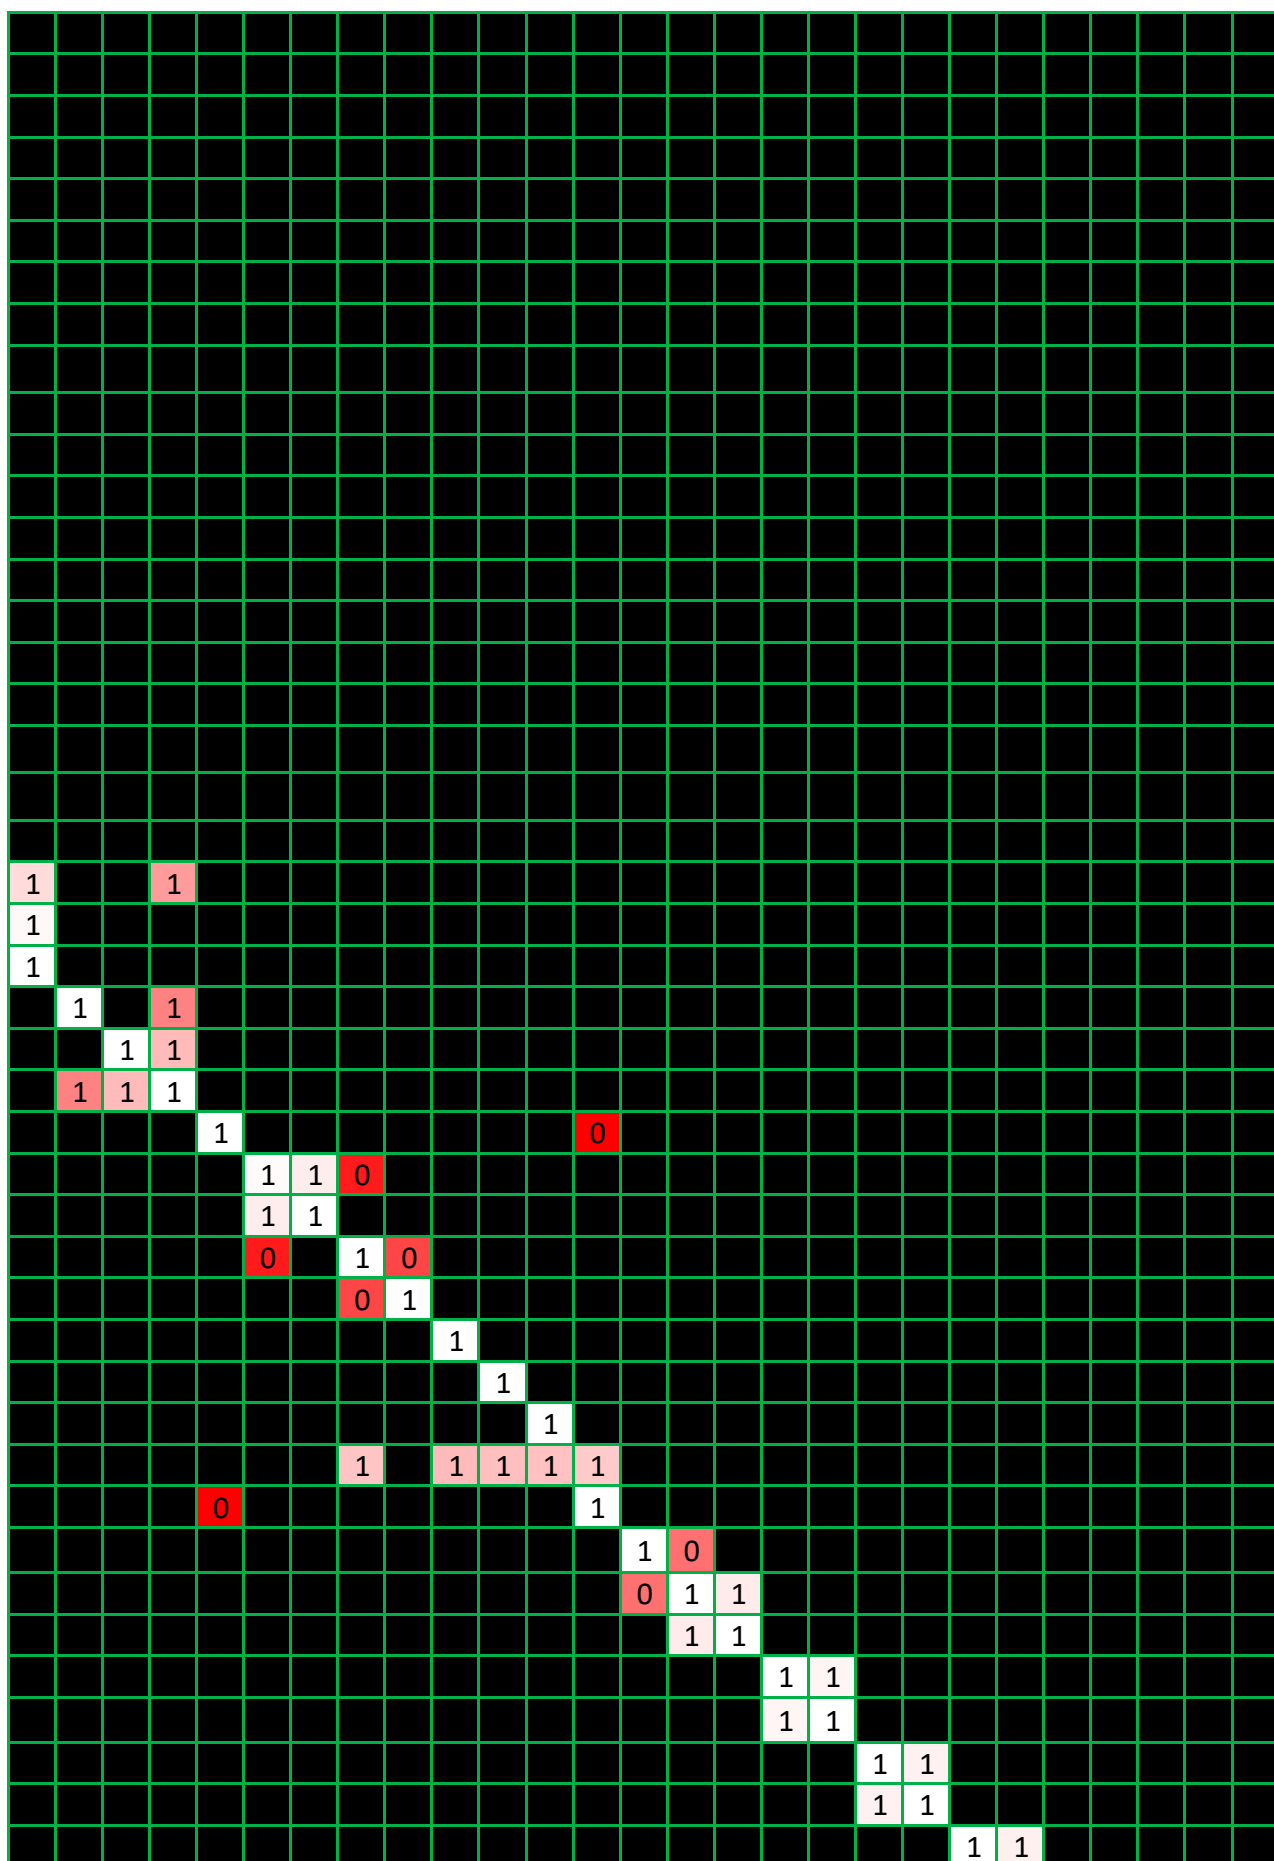

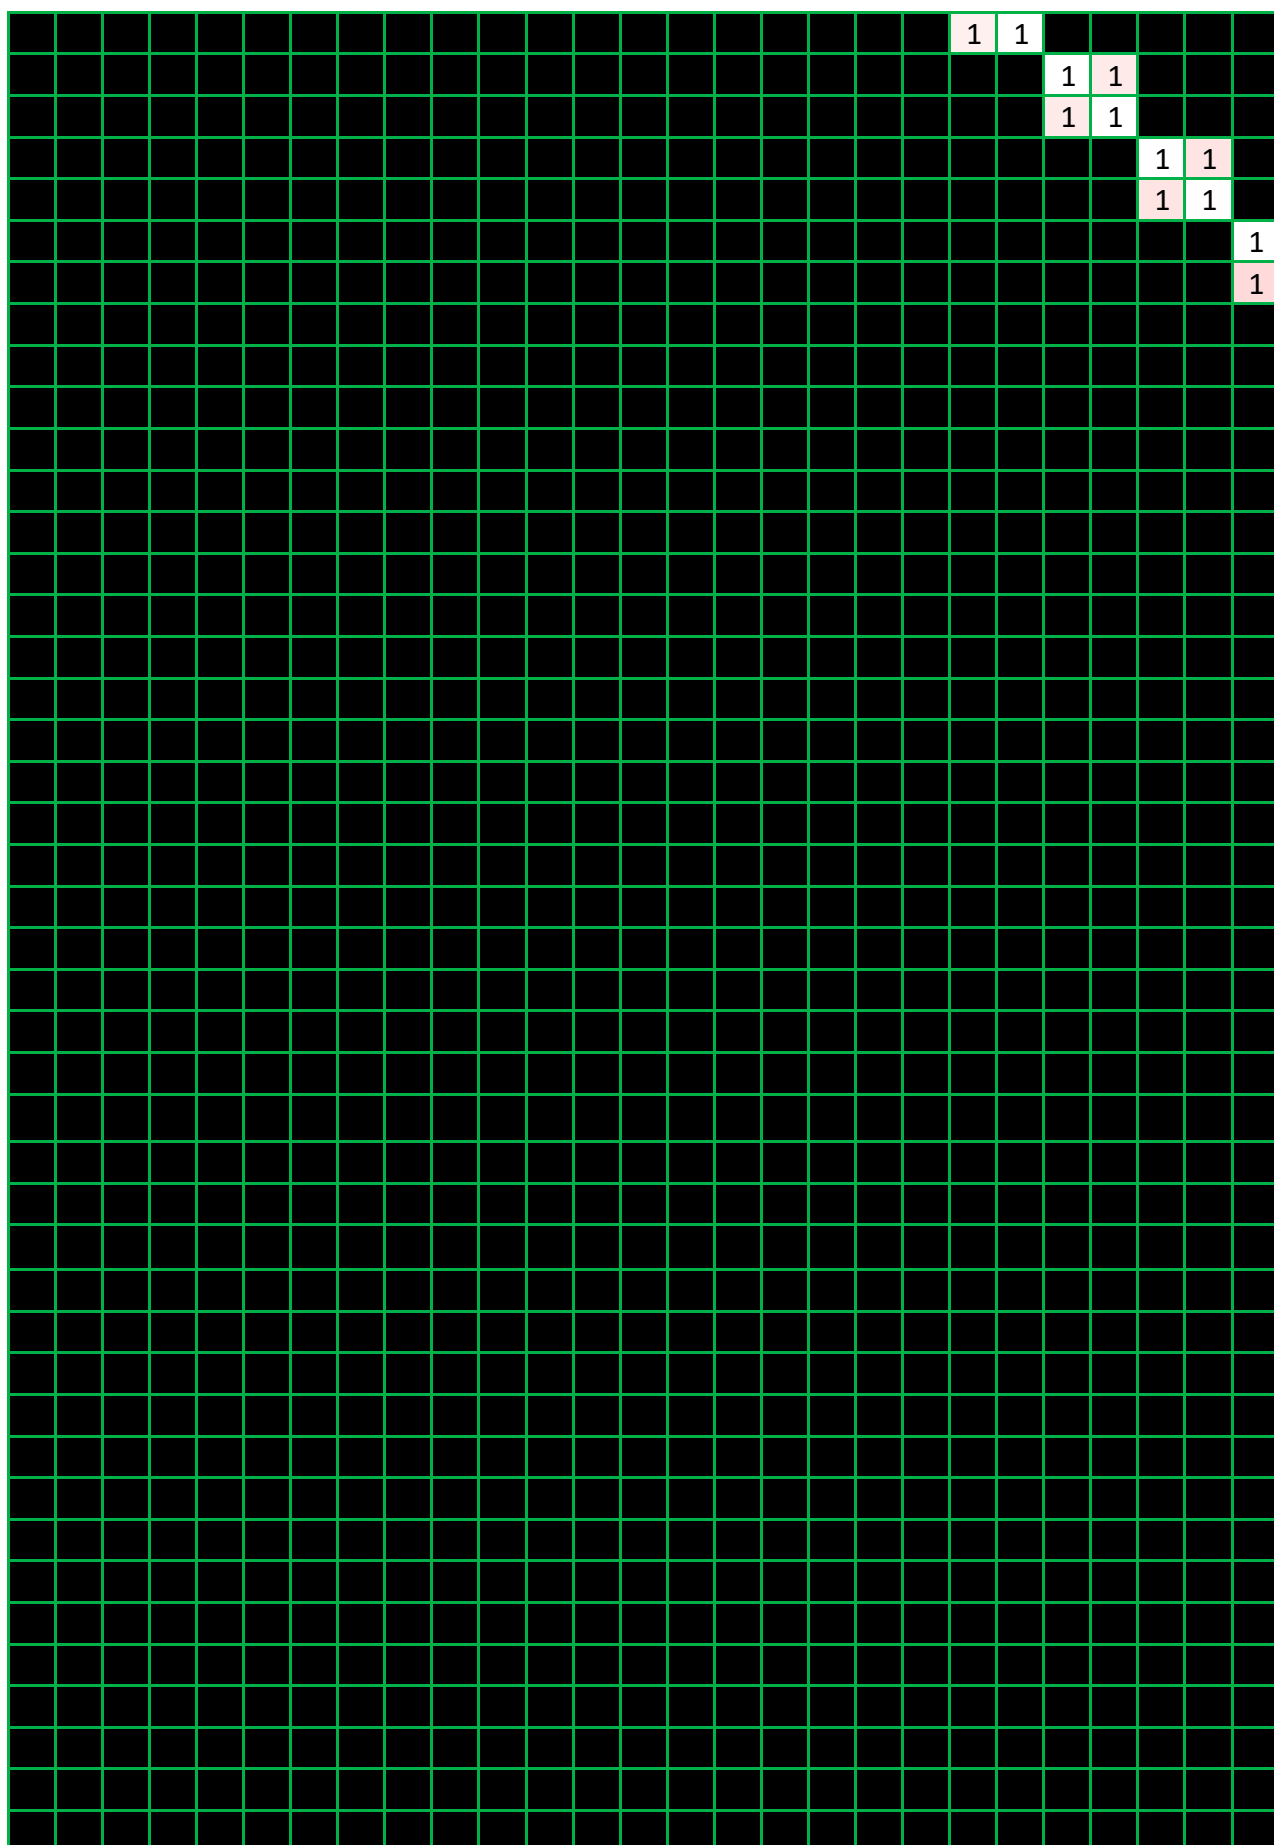

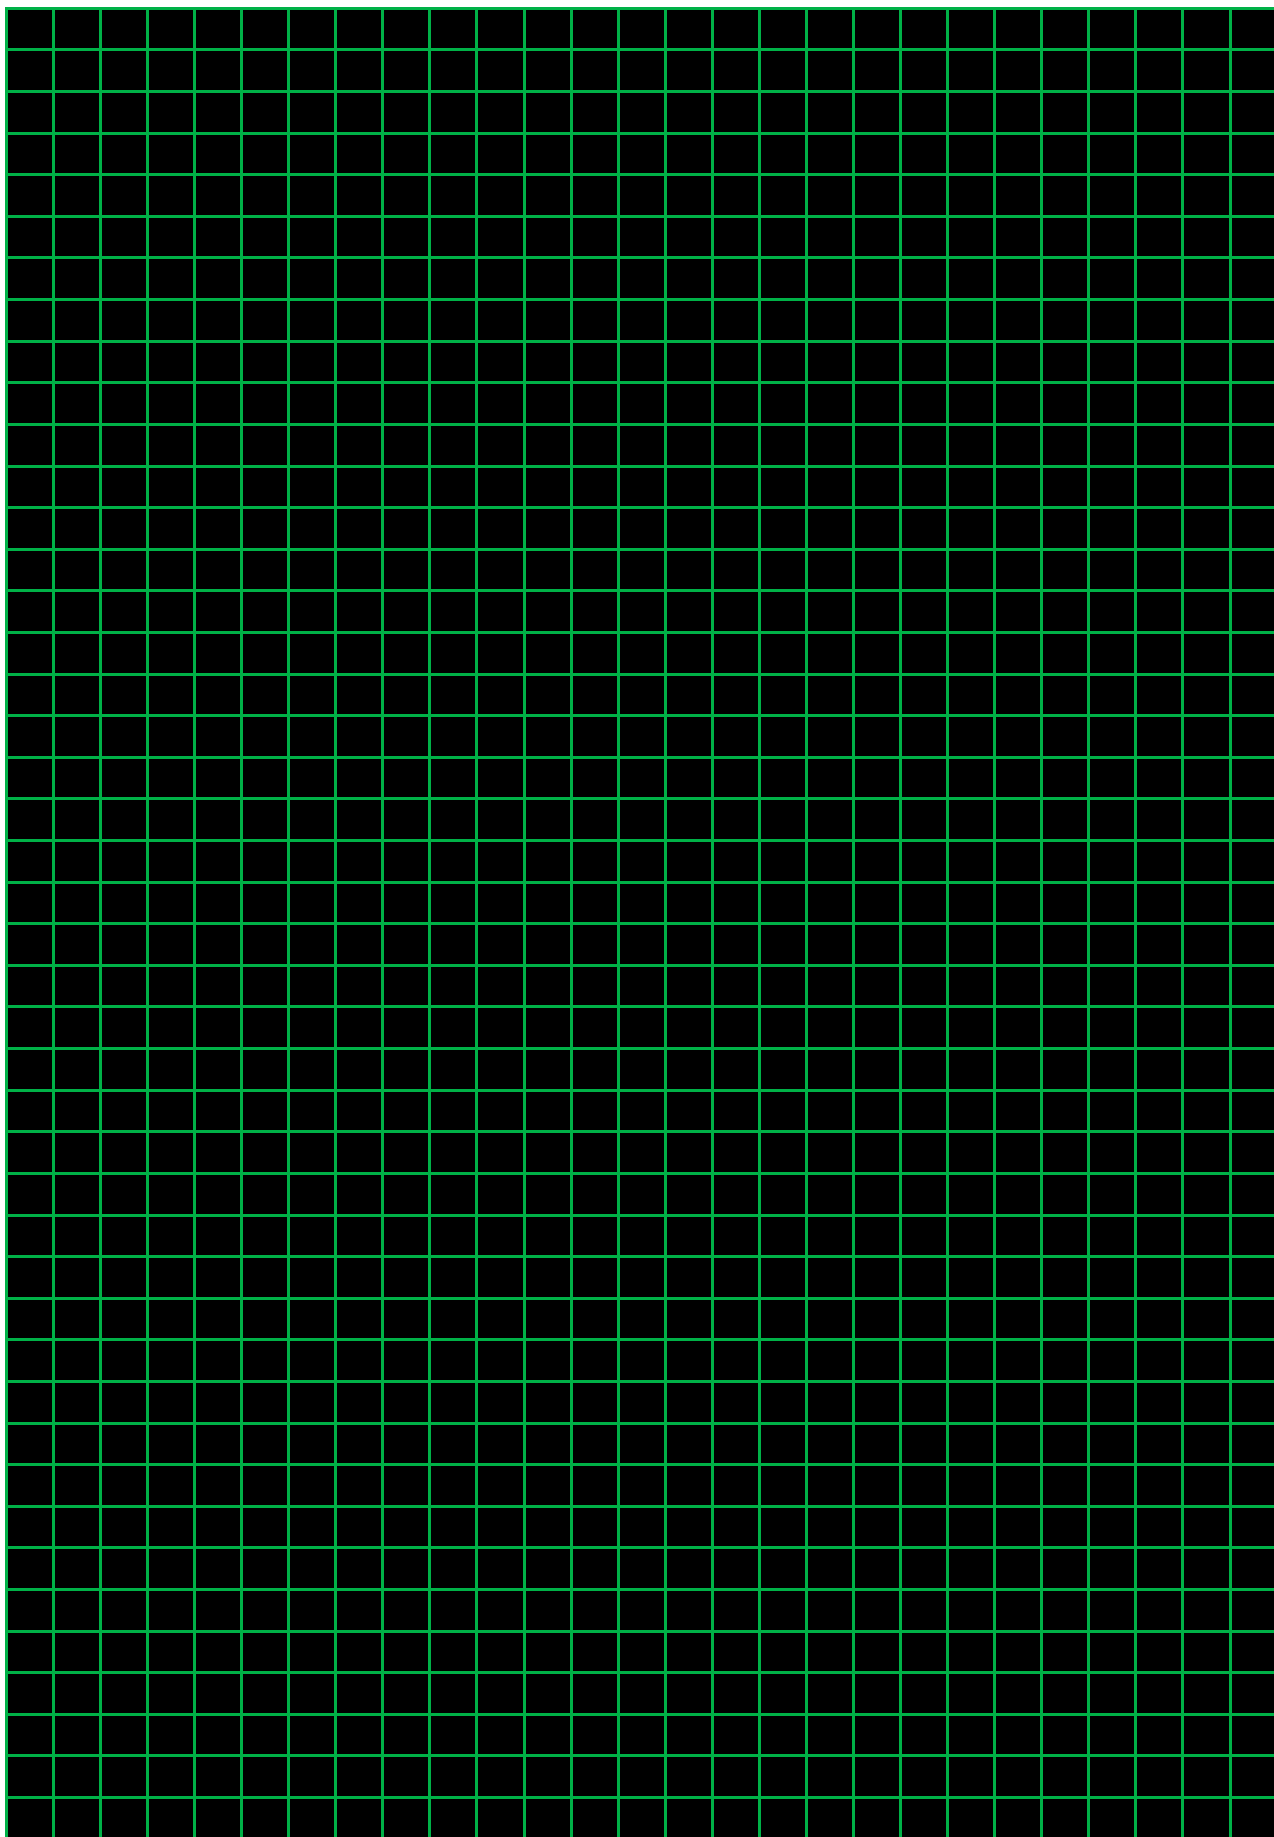

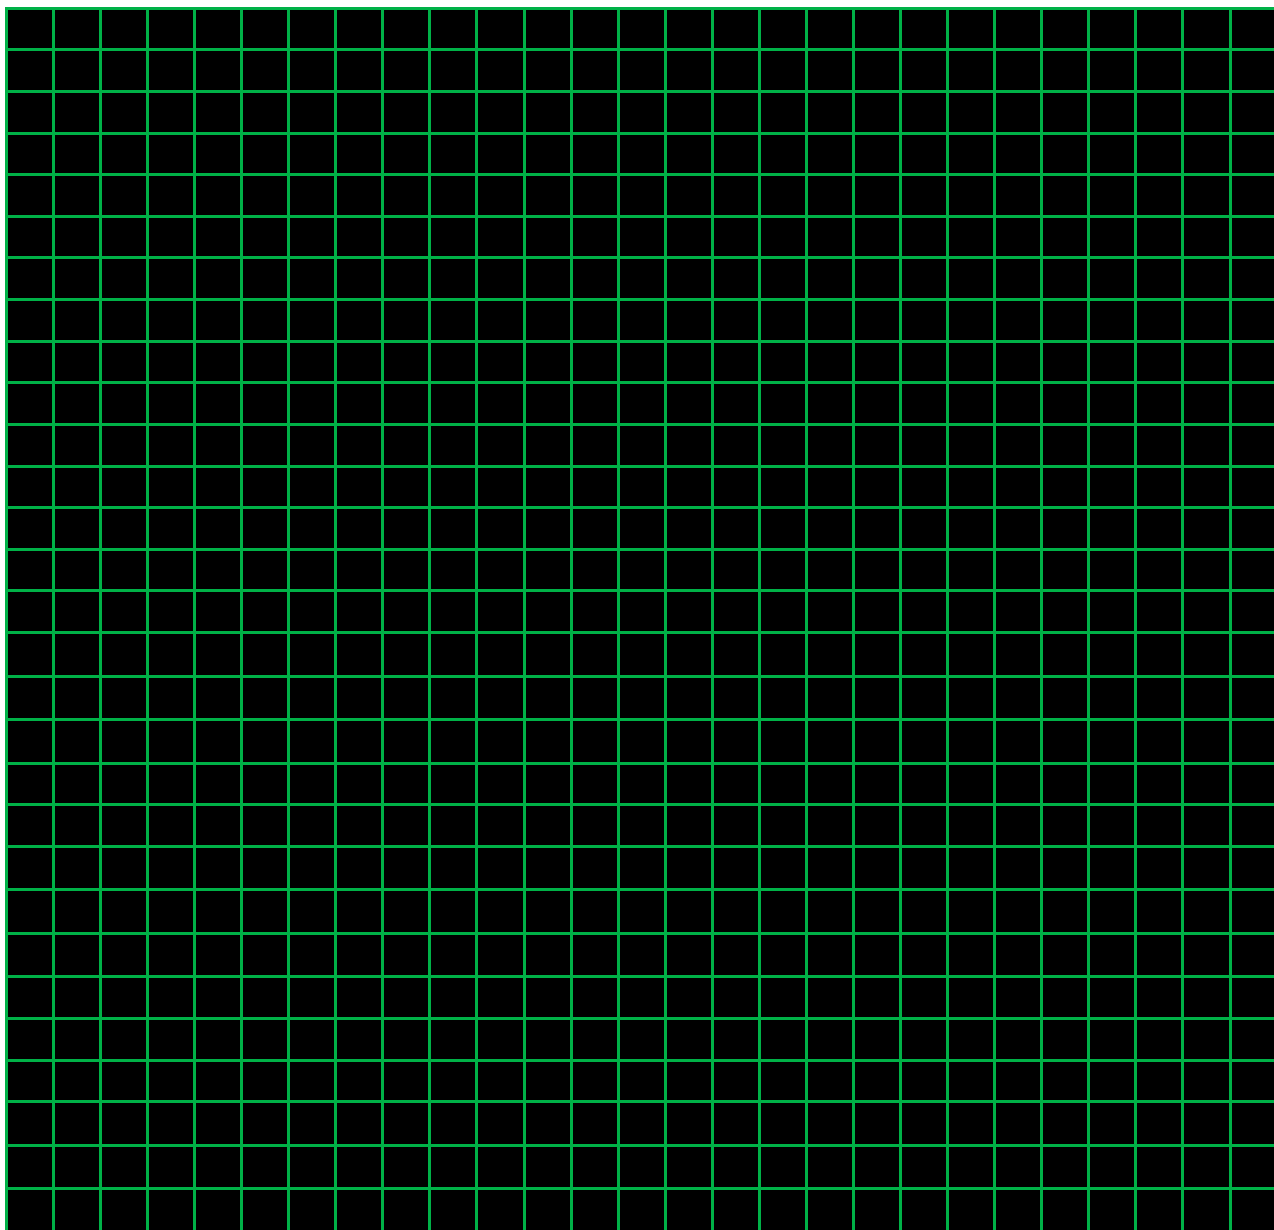

|         |
|---------|
| cd04631 |
| cd06173 |
| cd06174 |
| cd06180 |
| cd08173 |
| cd14830 |
| cd17320 |
| cd17040 |
| cd17321 |
| cd17324 |
| cd17330 |
| cd17477 |
| cd17504 |
| cd18028 |
| cd18577 |
| cd18586 |
| cd06503 |
| PS51688 |
| PF13884 |
| cd14688 |
| PF06725 |
| cd14667 |
| PF13539 |
| cd14845 |
| PF00182 |
| cd00325 |
| PF16754 |

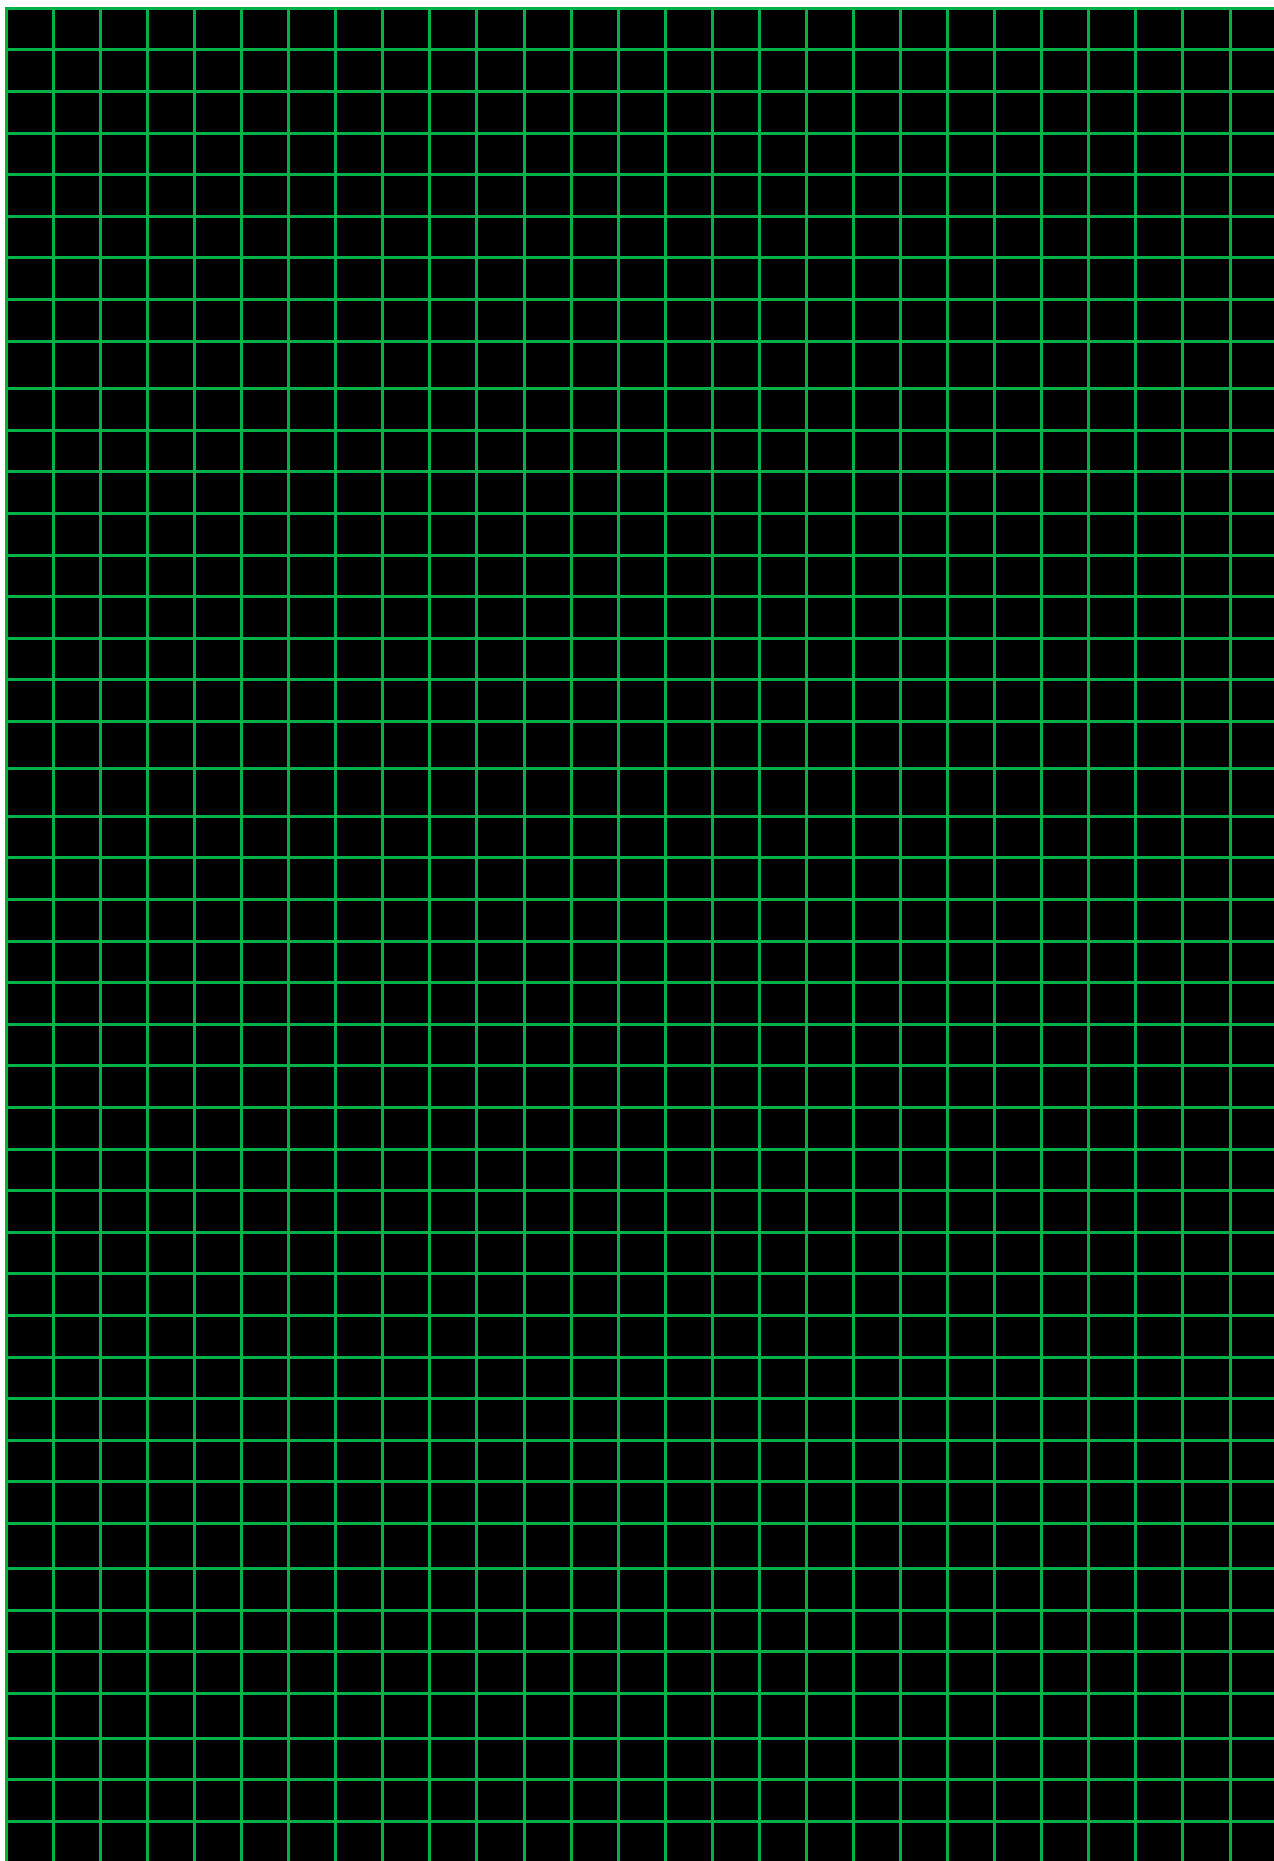

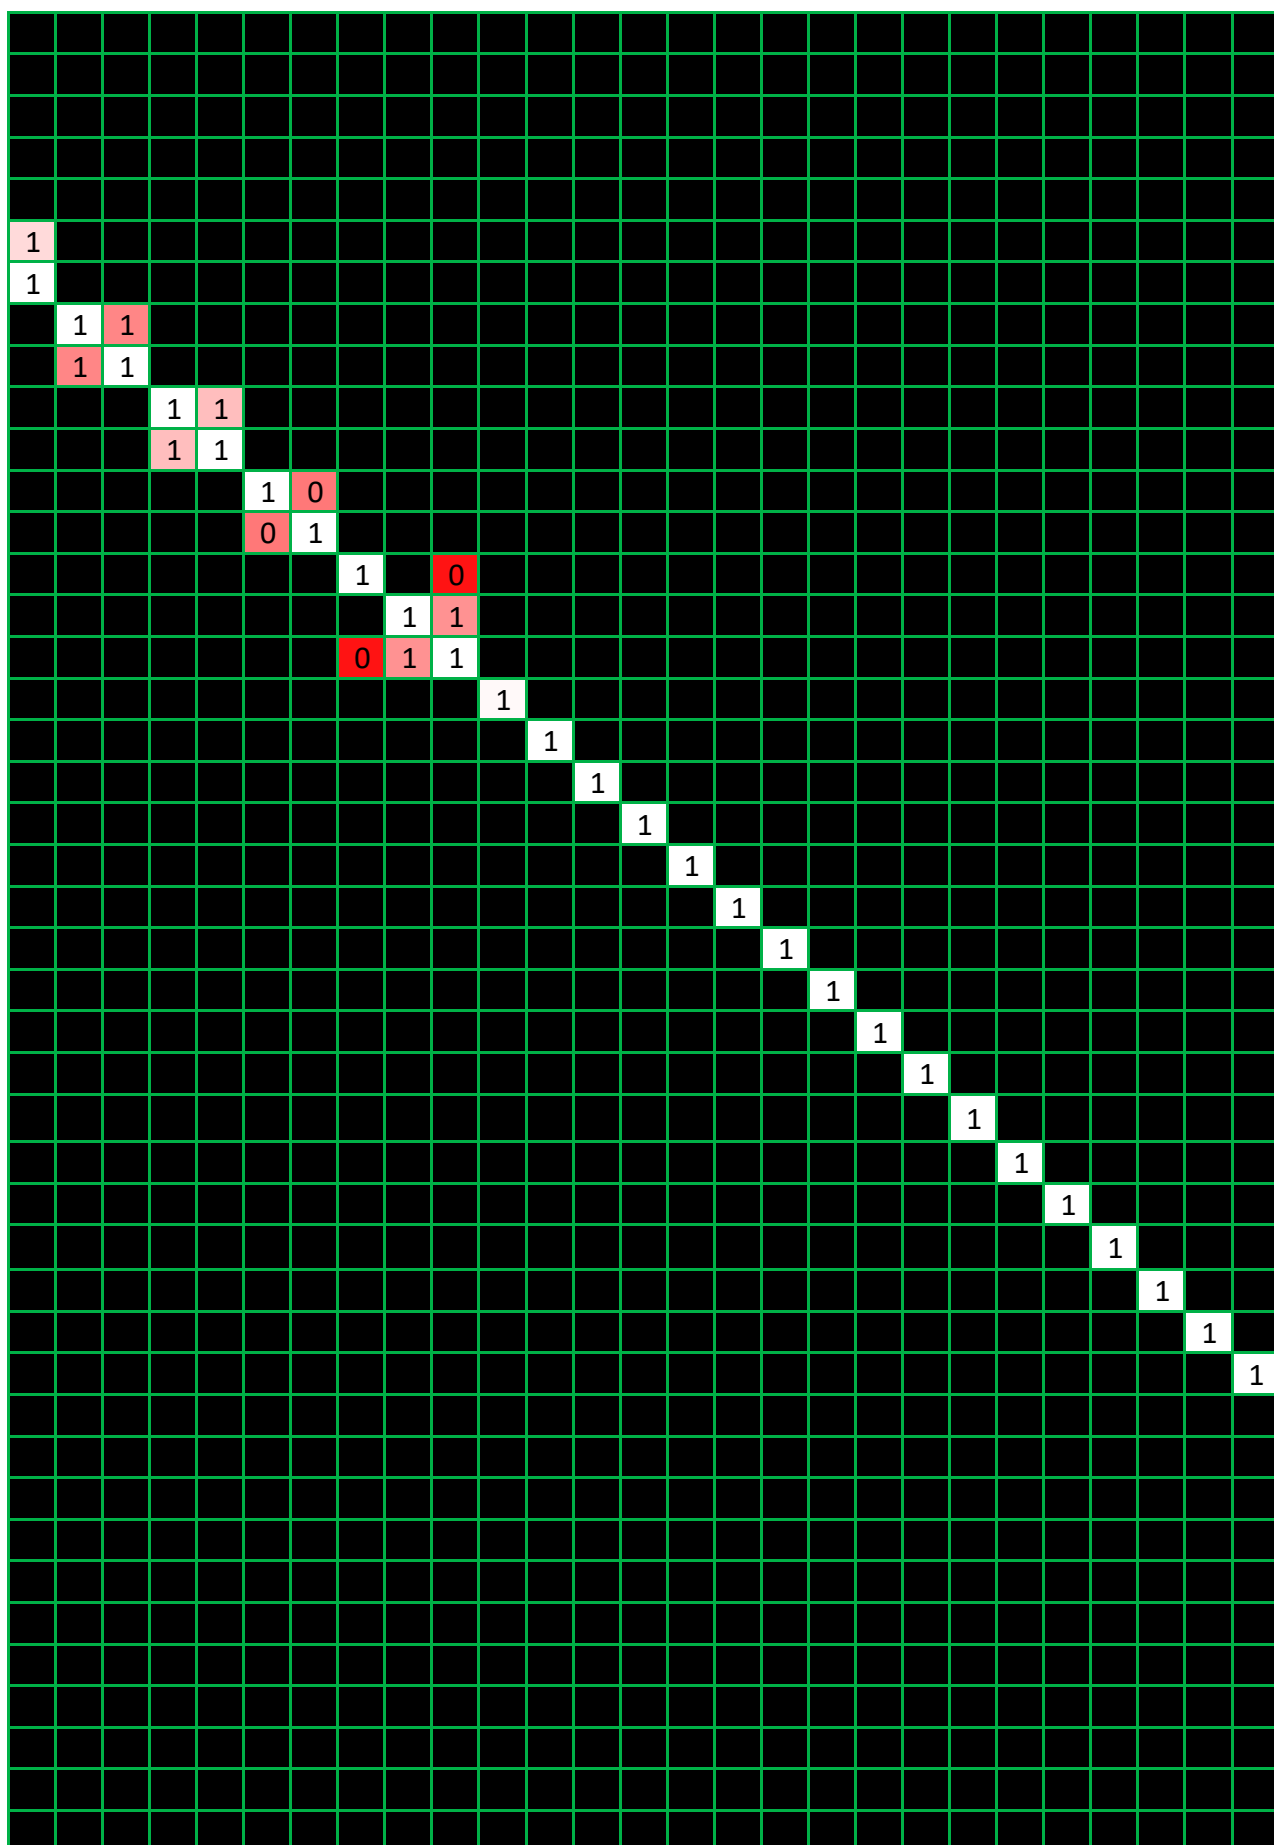





|         |
|---------|
| PF13529 |
| PF13385 |
| PF13550 |
| PF13751 |
| PF13810 |
| PF15711 |
| PF16775 |
| PF16838 |
| PF17969 |
| PF18341 |
| PF18798 |
| PF18760 |
| PF18809 |
| PF18823 |
| PF18853 |
| PF18857 |
| PF18858 |
| PS50163 |
| PS50817 |
| PS50853 |
| PS51186 |
| PS50861 |
| PS51272 |
| cd00442 |
| cd00063 |
| cd00890 |
| cd02775 |



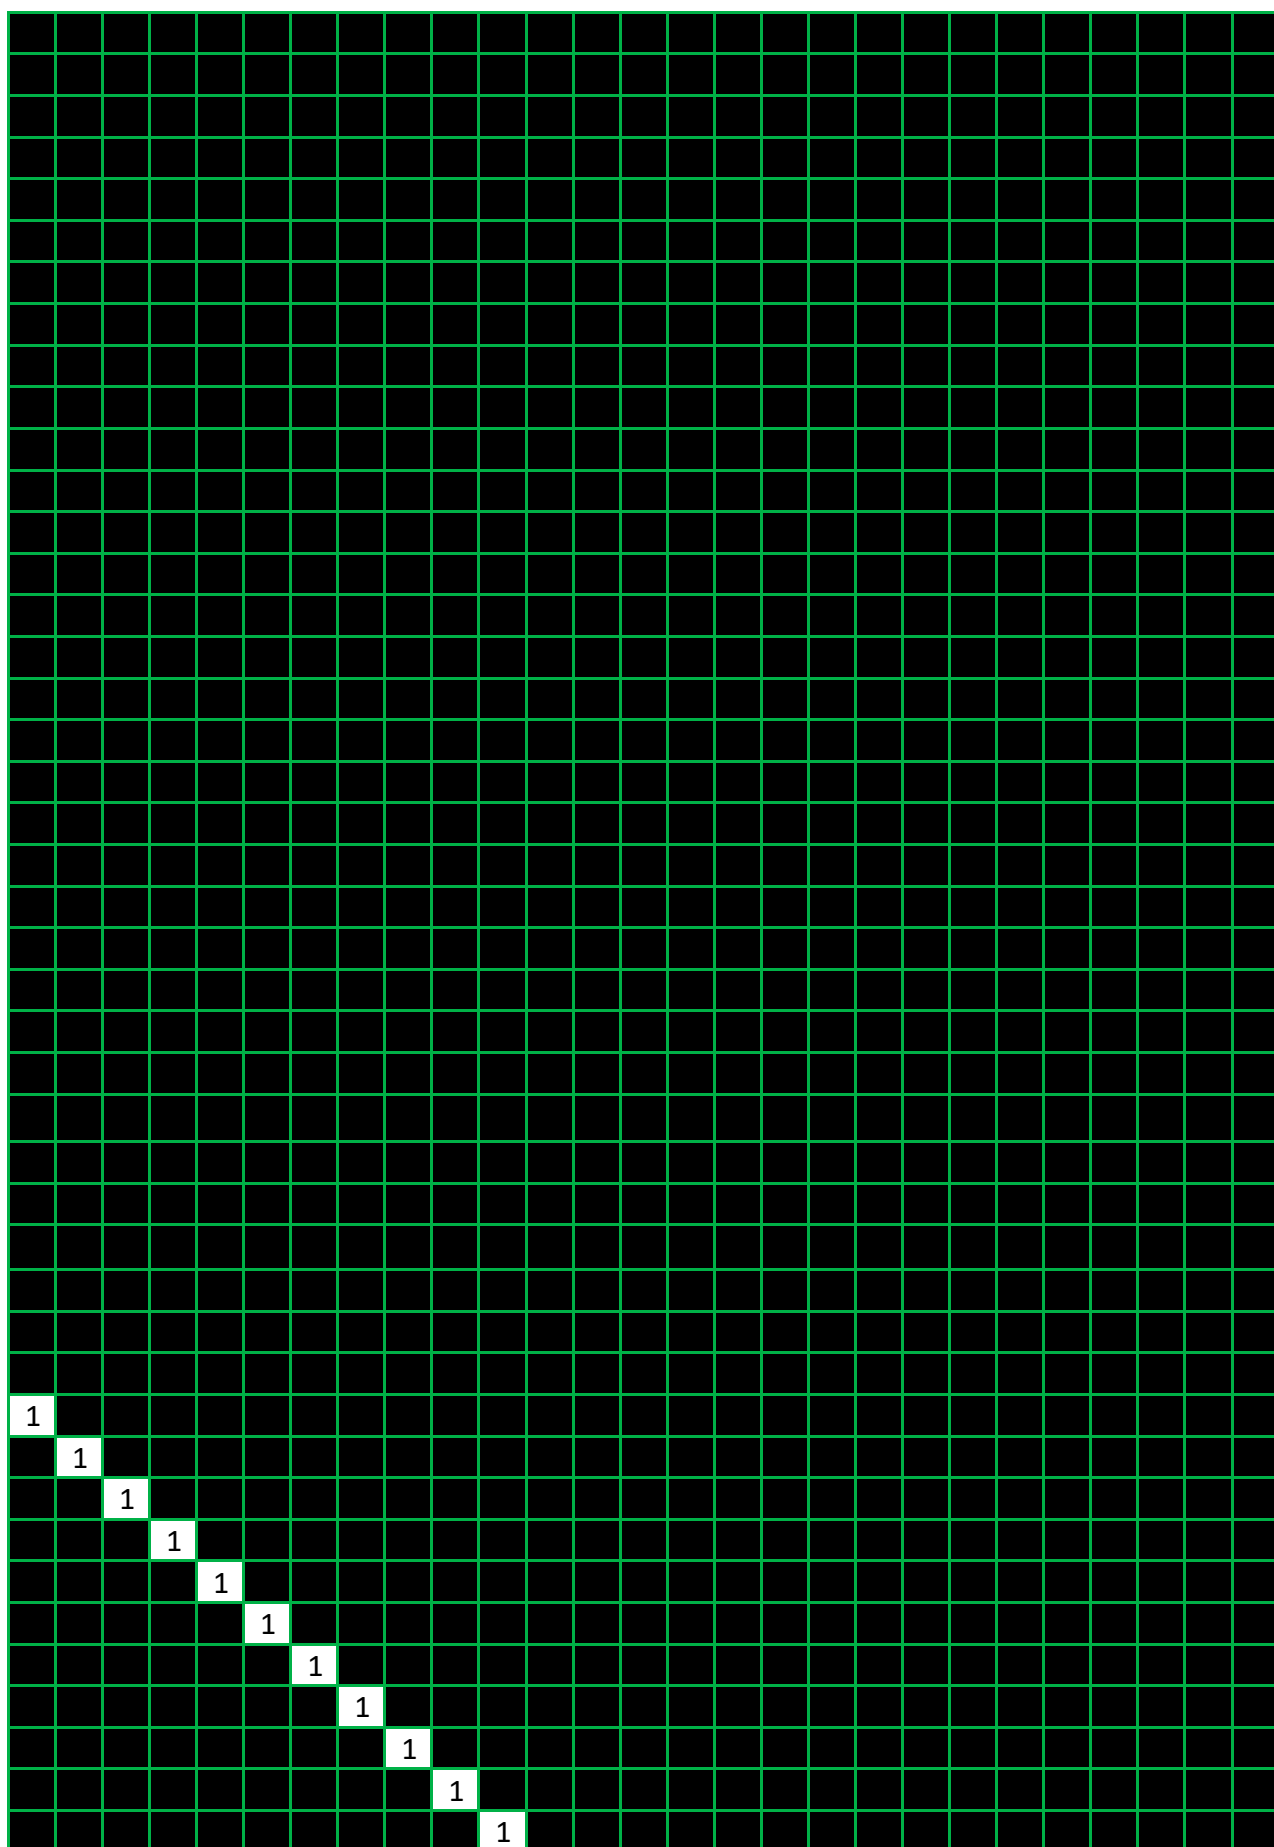

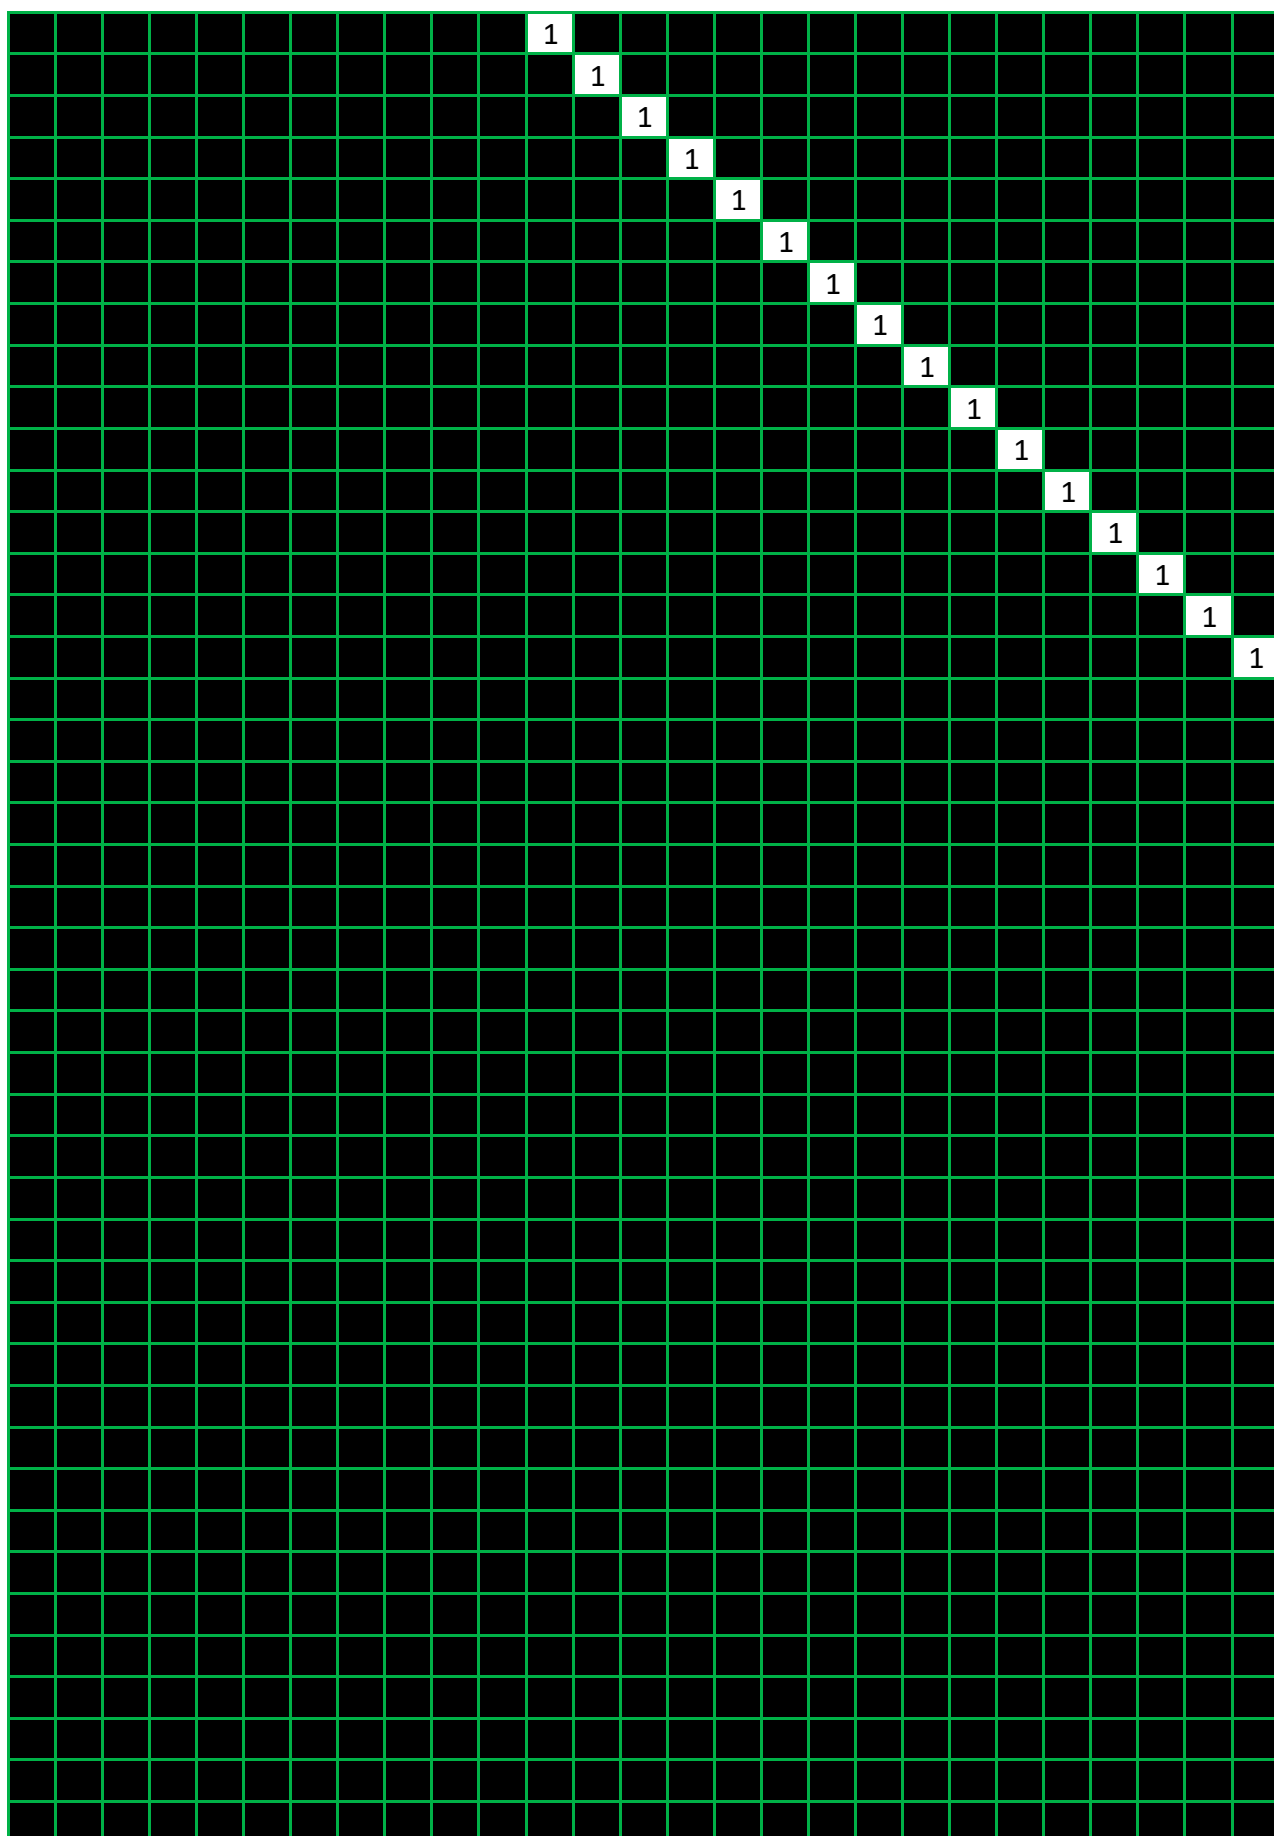



[illegible][illegible][illegible][illegible][illegible][illegible][illegible][illegible][illegible]





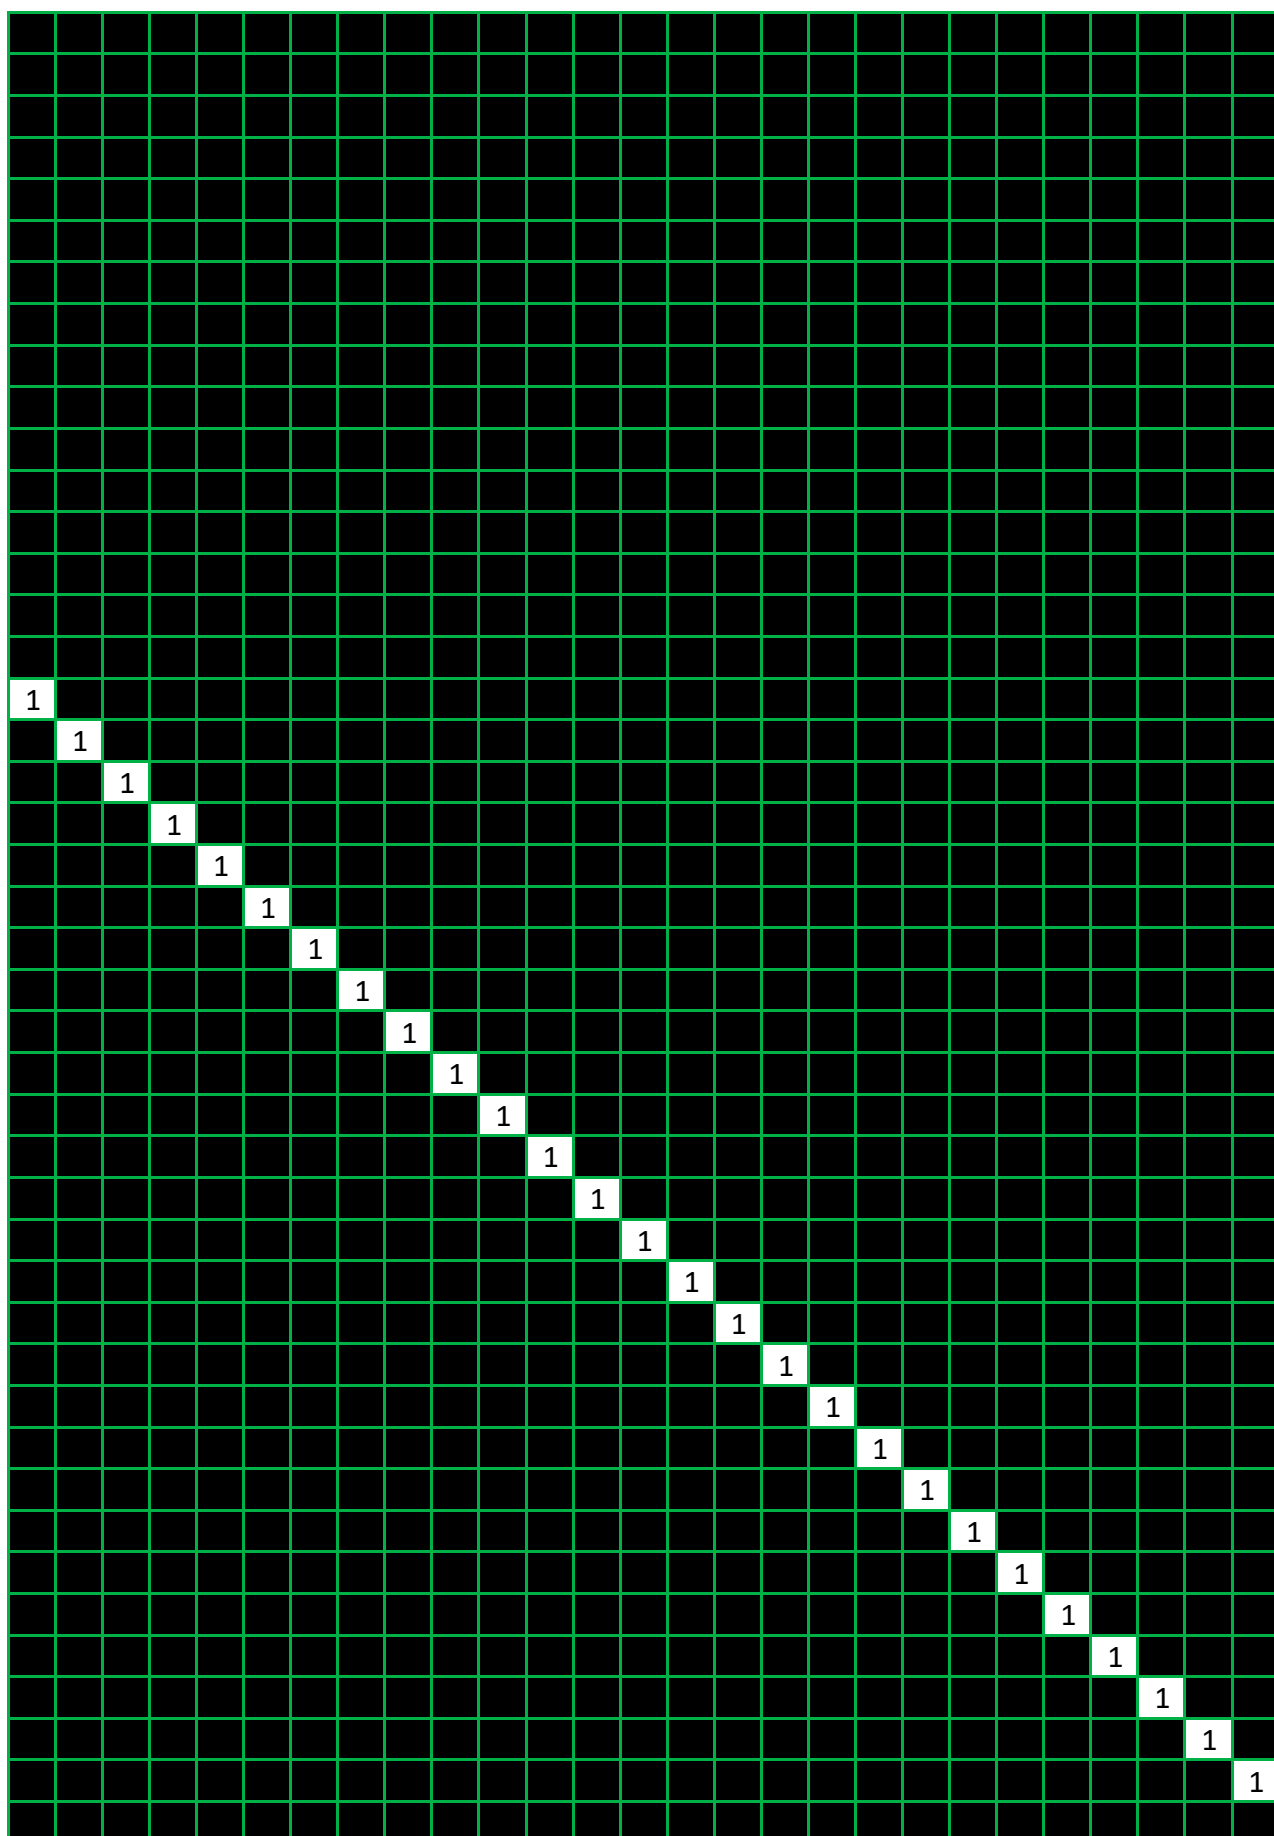



[illegible]

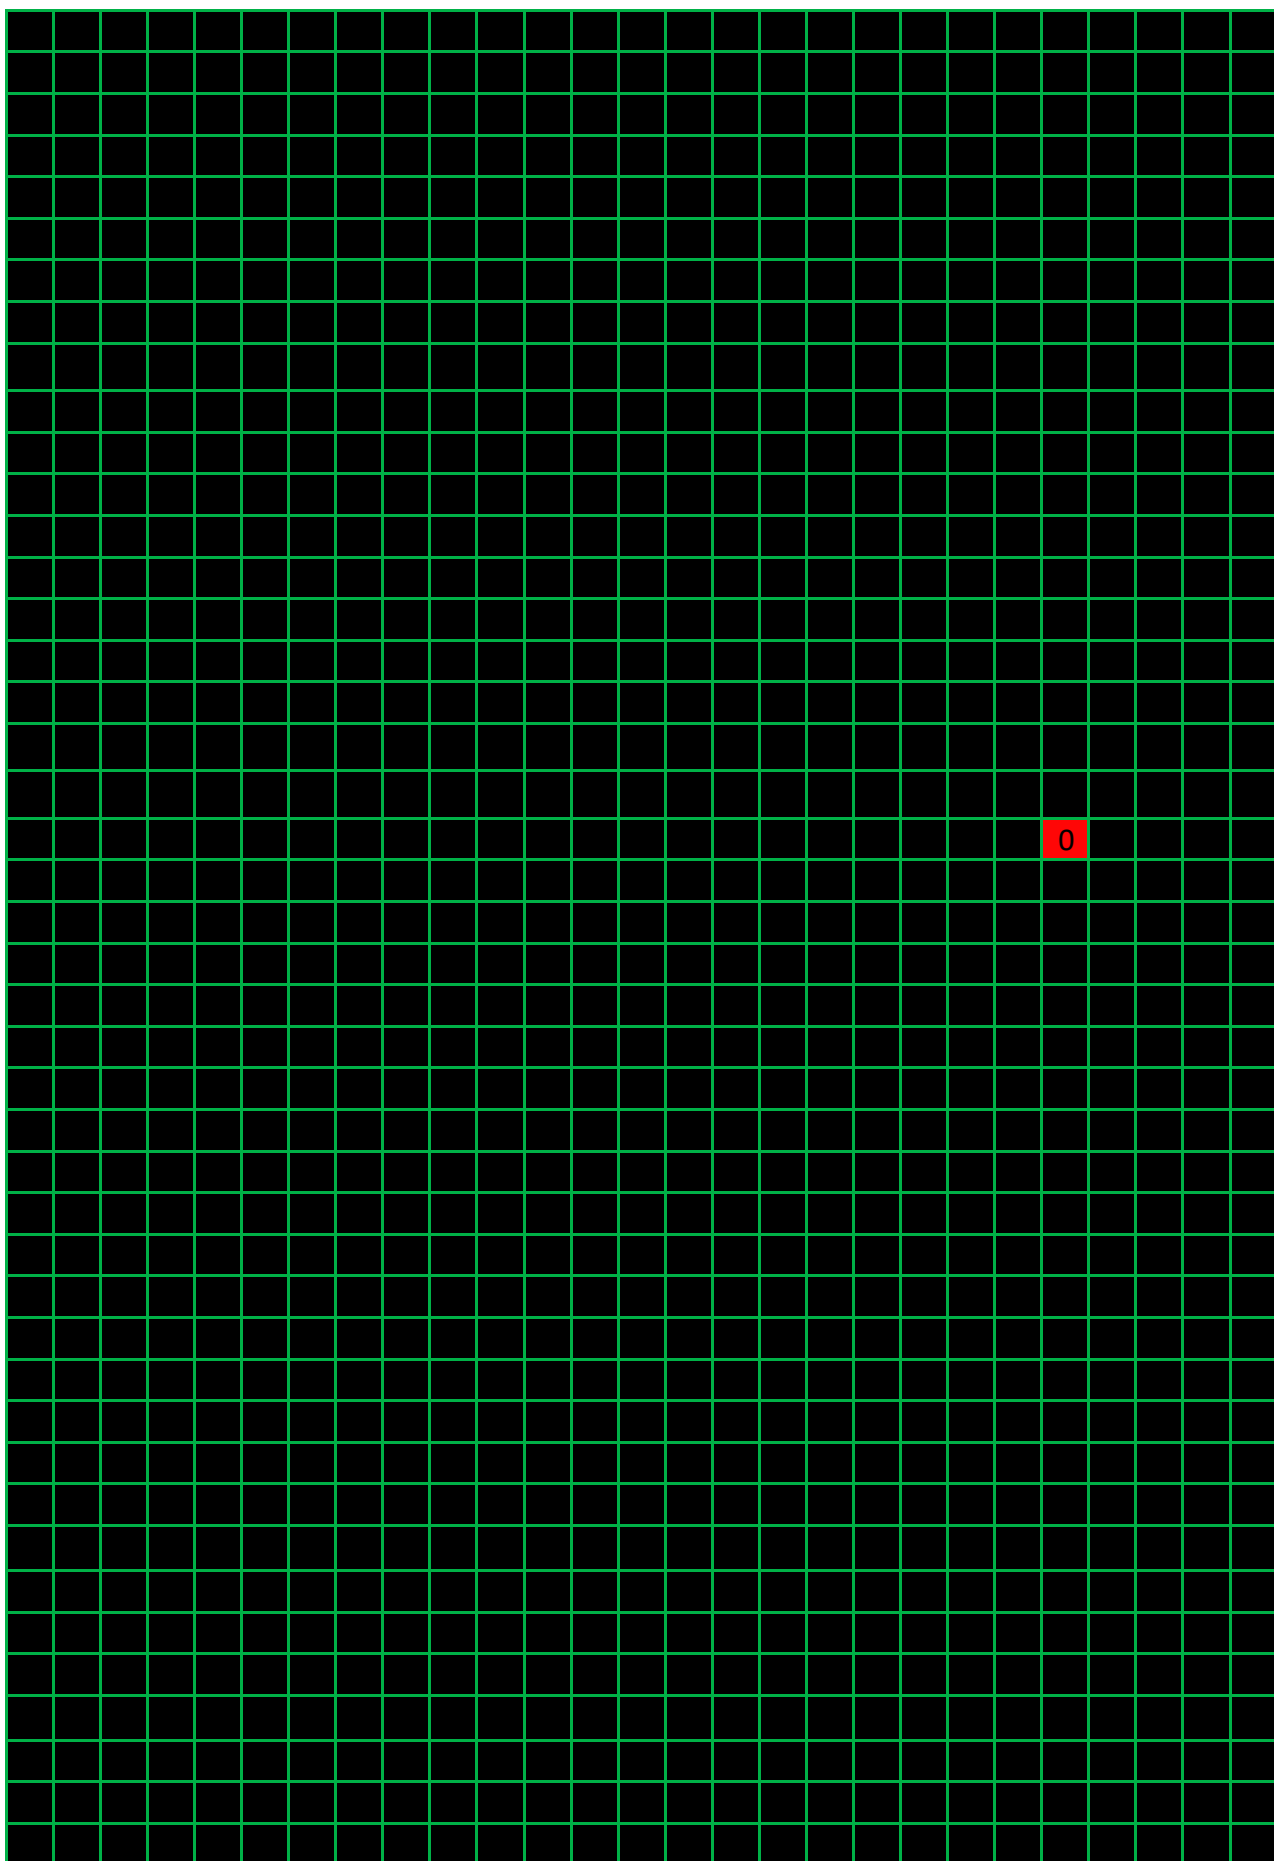

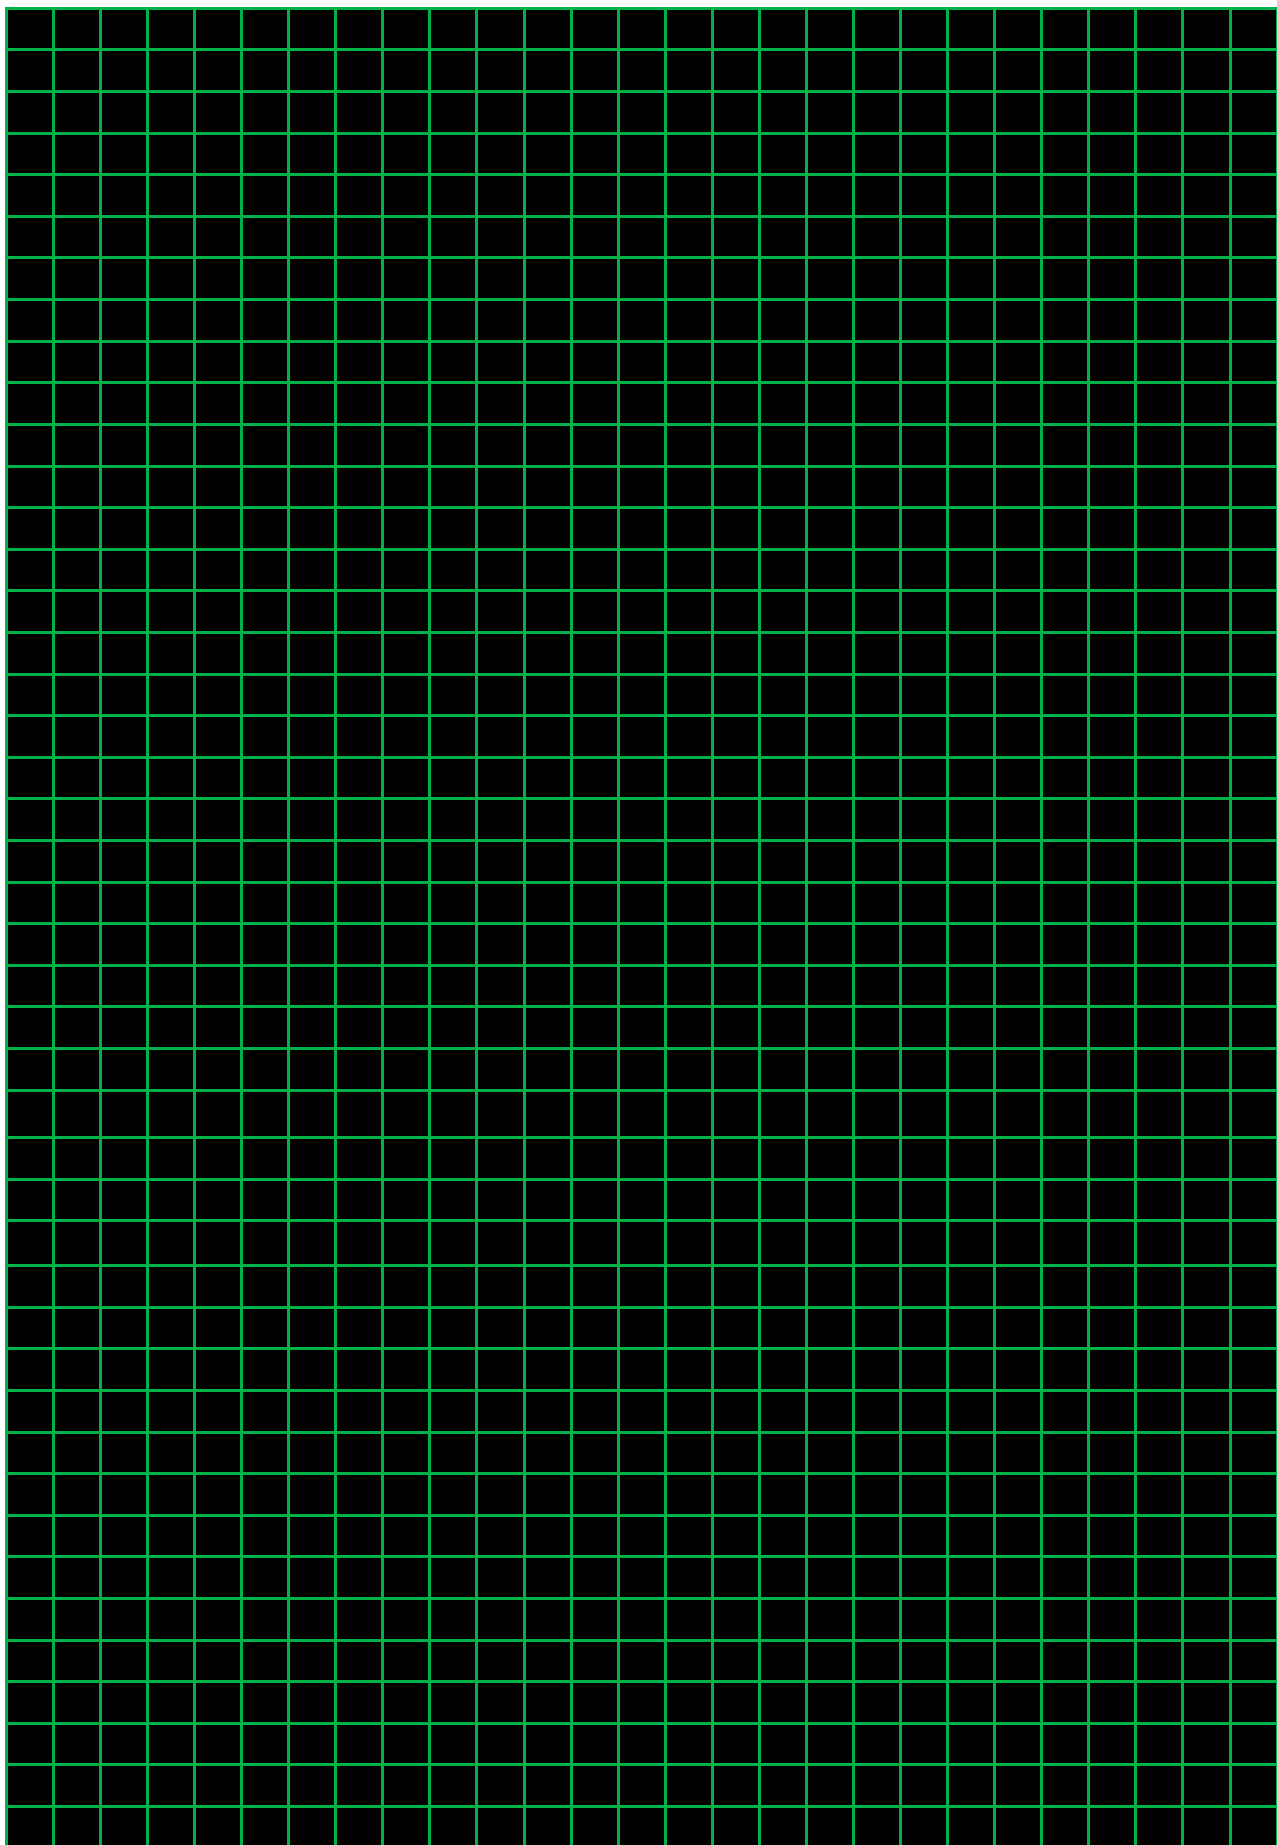

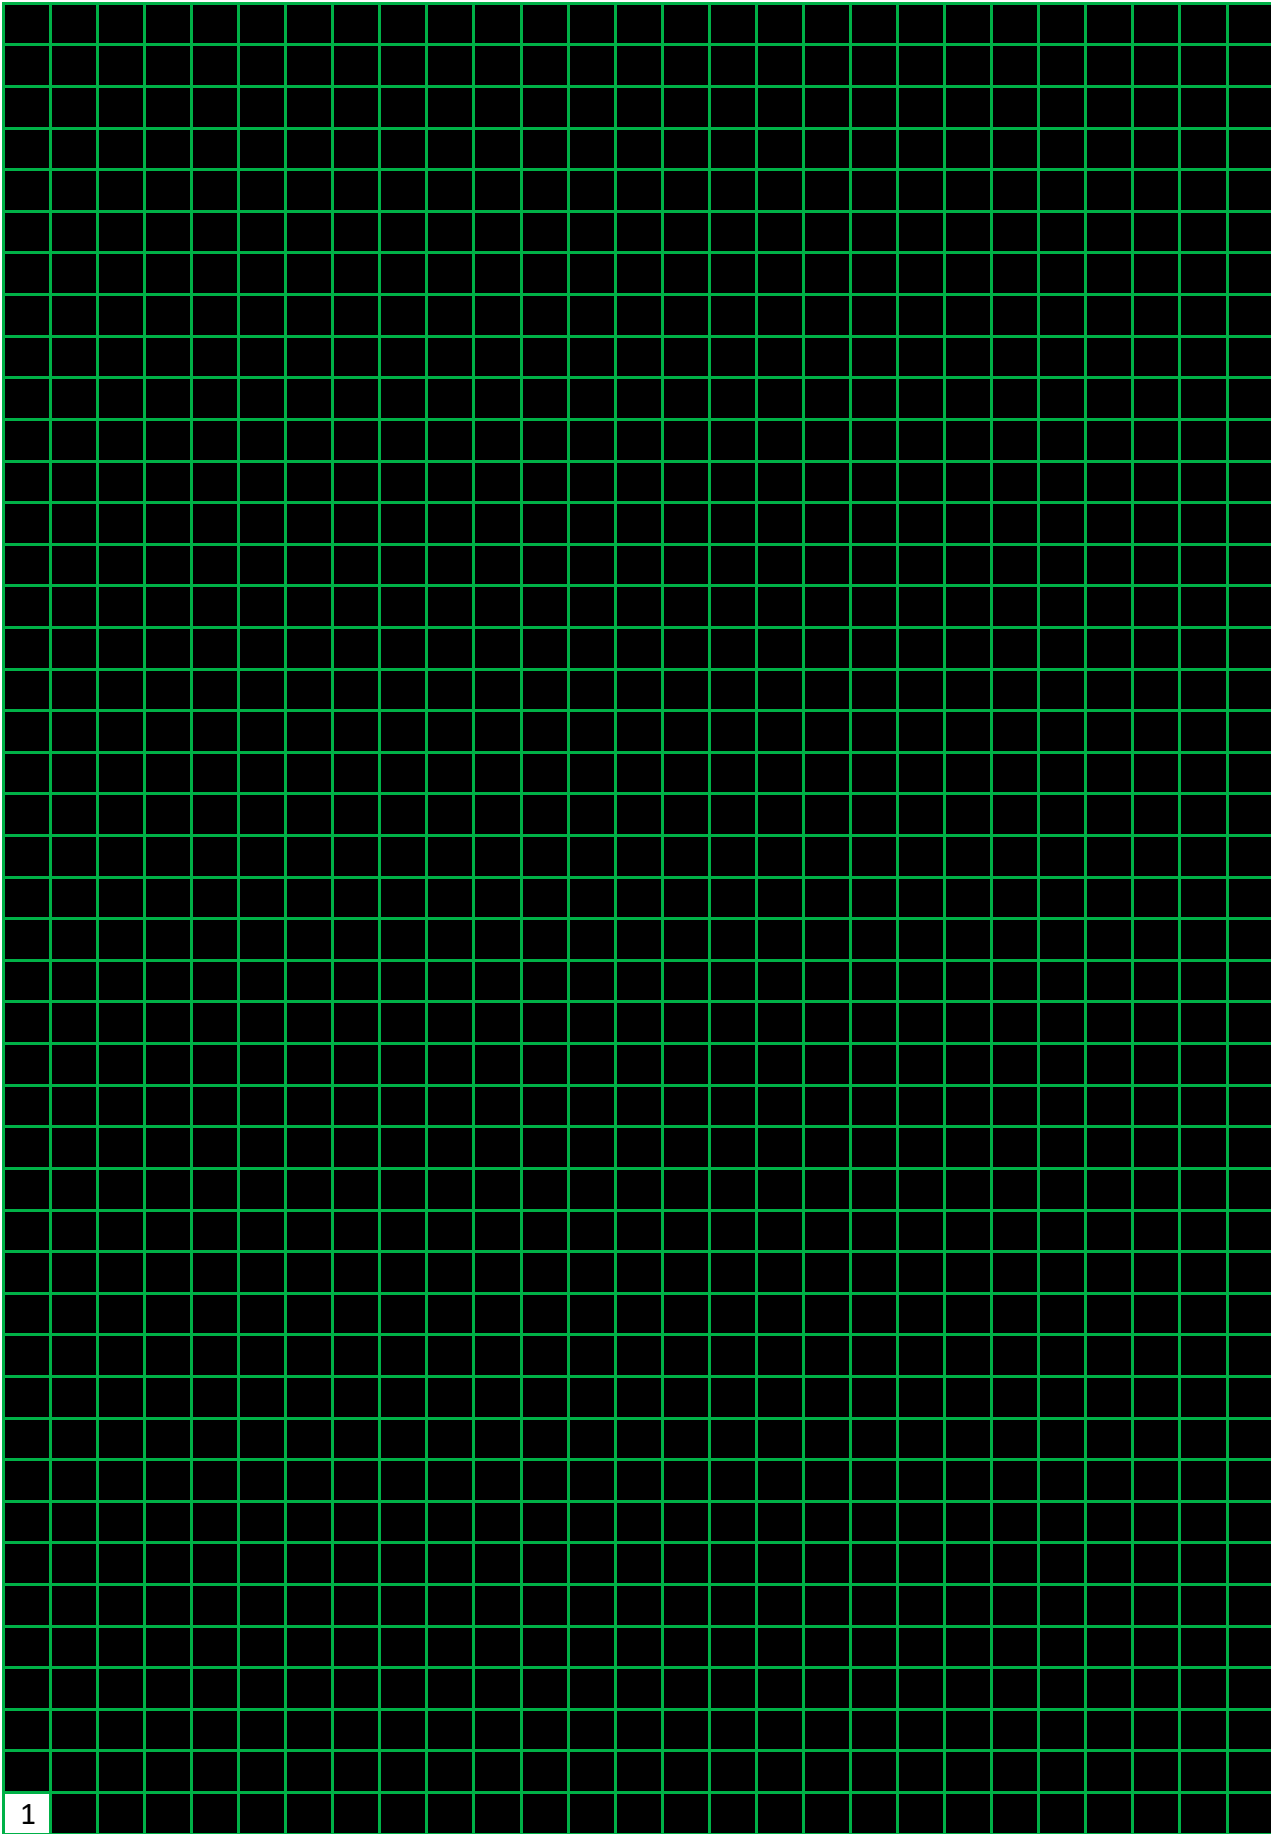

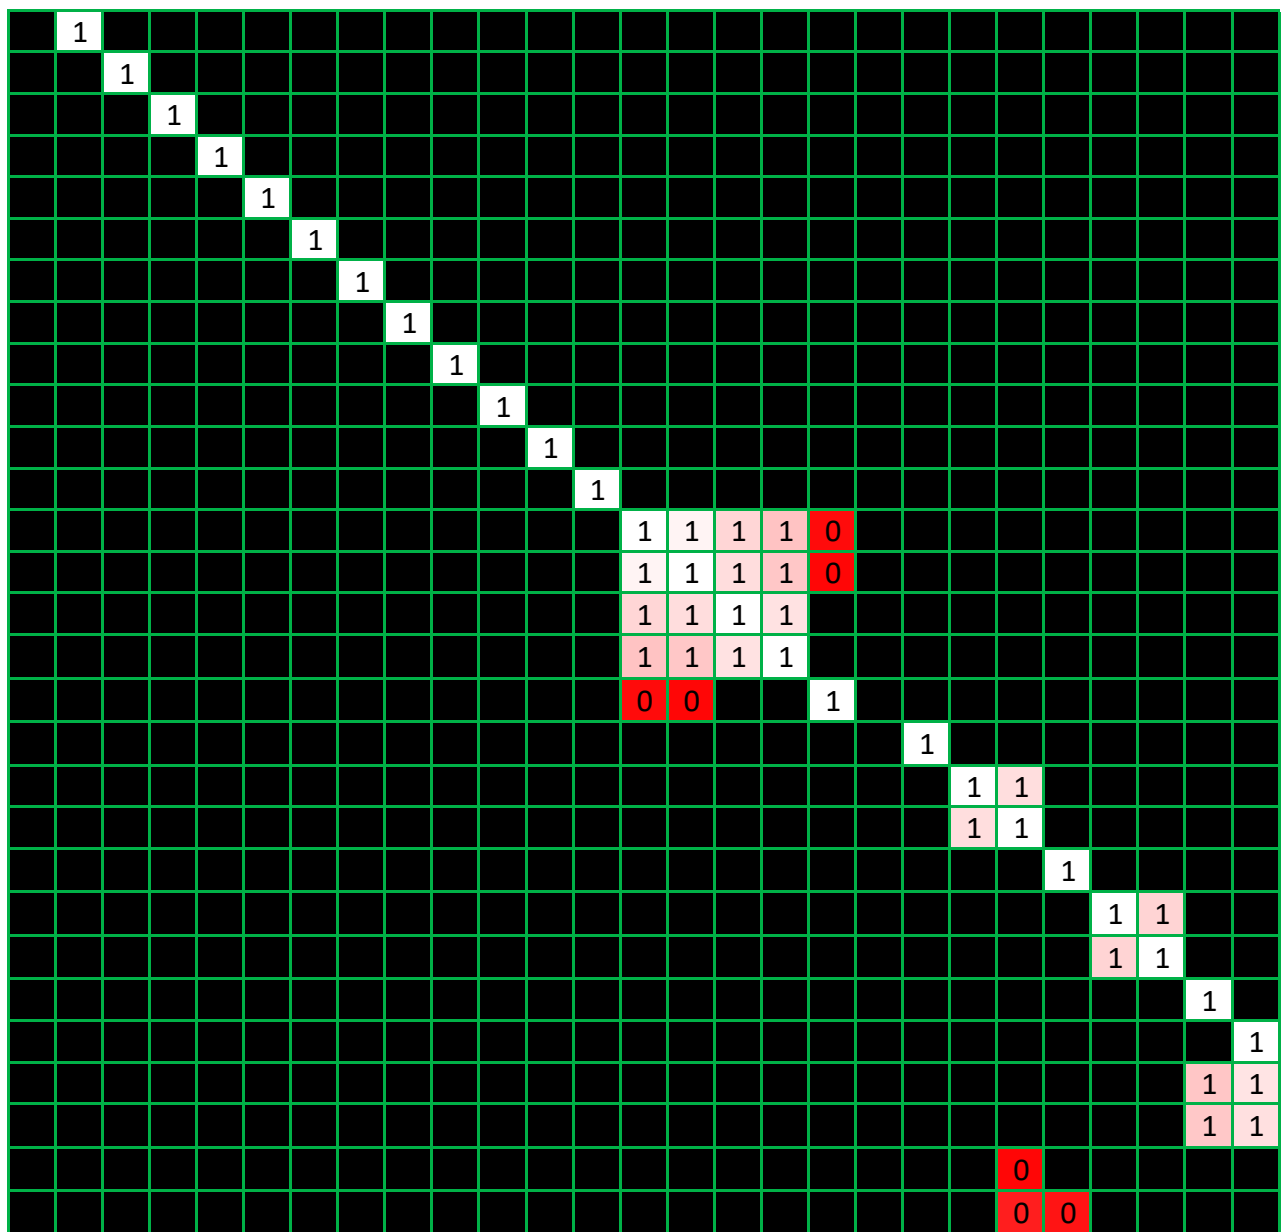

absolute number of overlaps between each pair of do

[illegible][illegible]



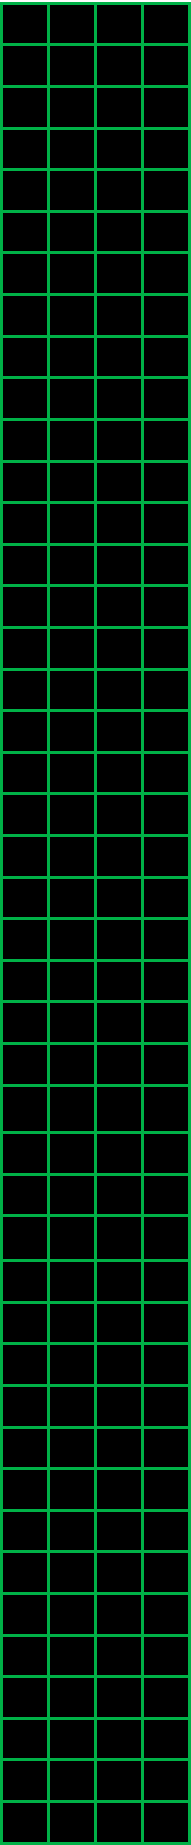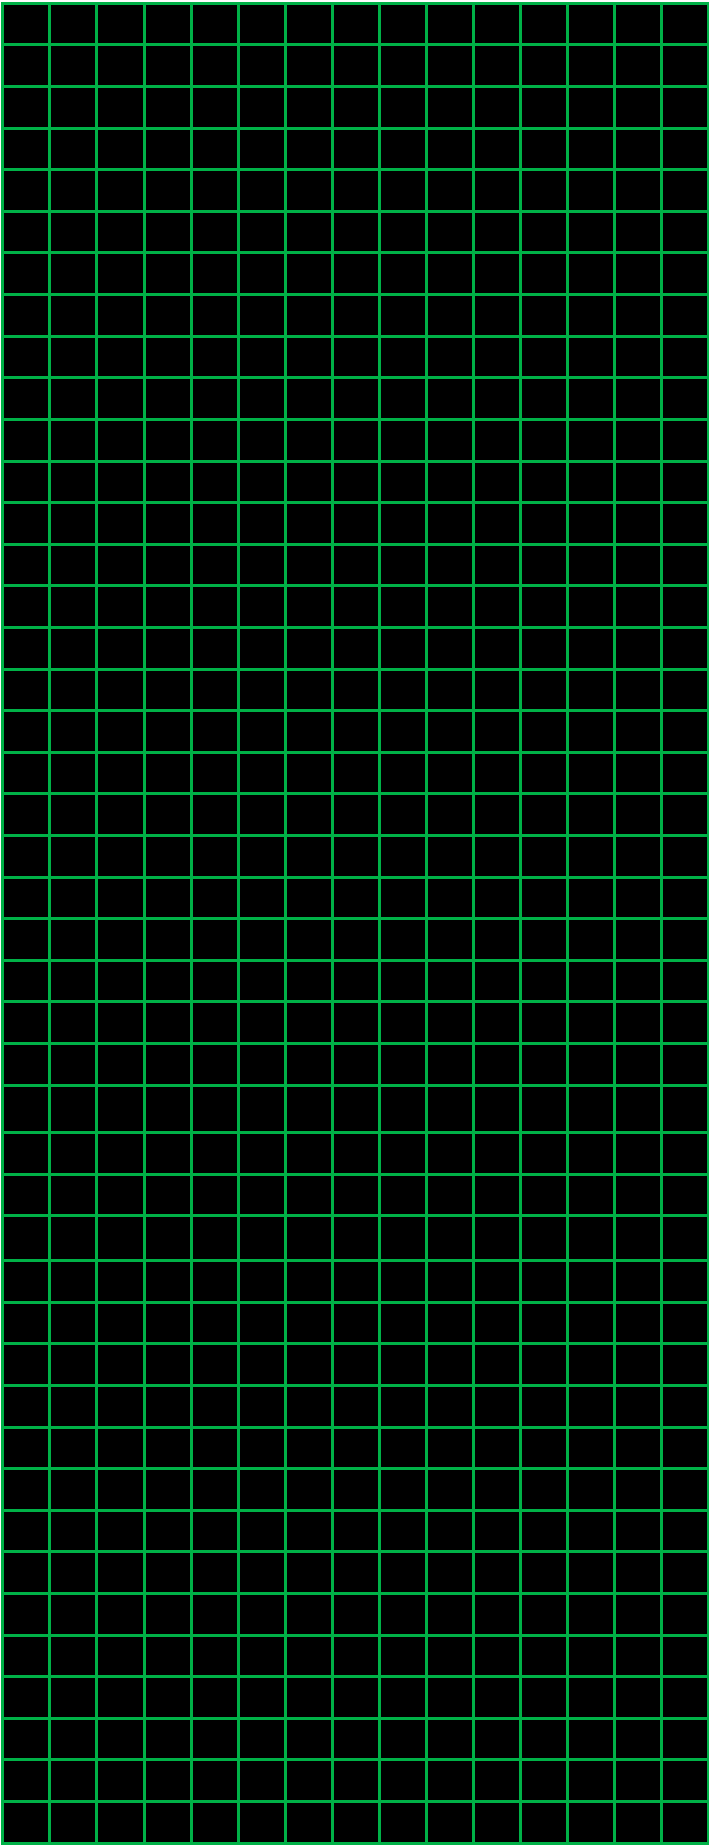

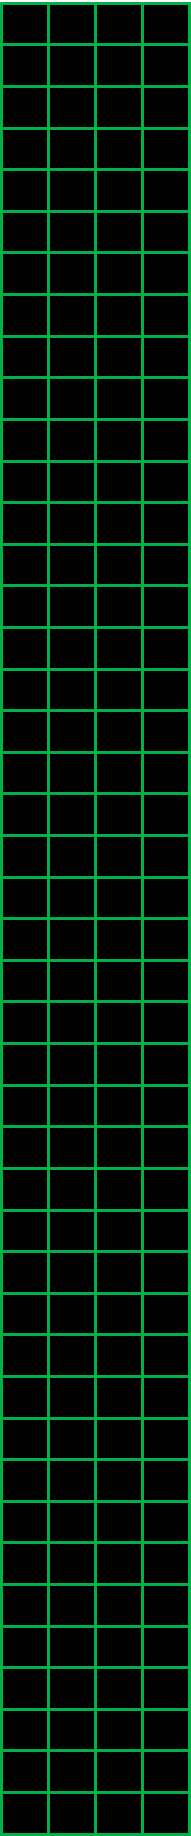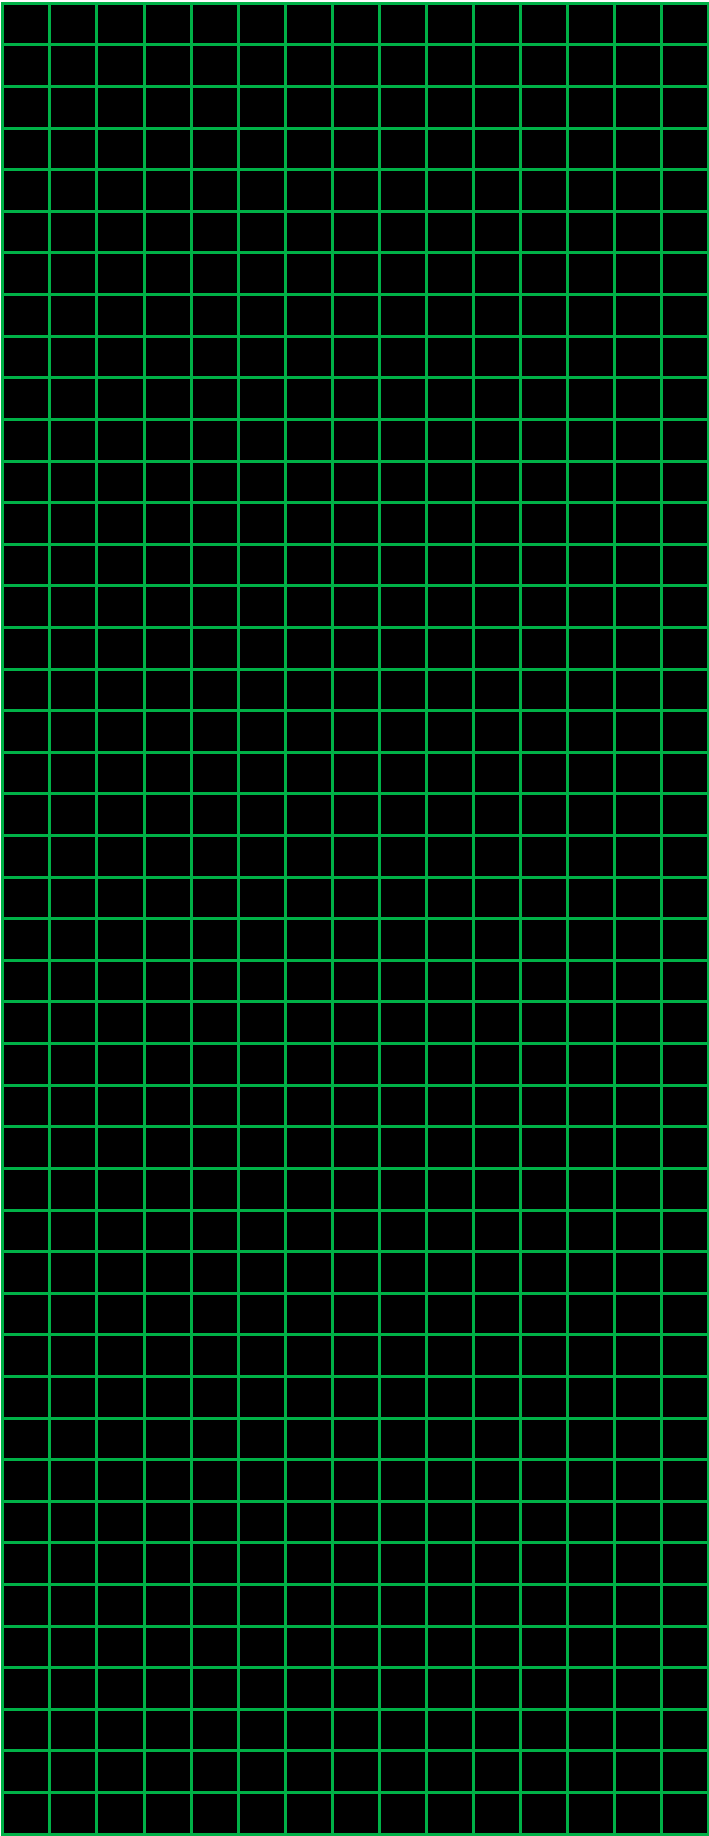

[illegible]This image shows a full page of graph paper. The background is white, and it is covered by a uniform grid of thin, light blue horizontal and vertical lines. These lines intersect to form a series of small, identical squares across the entire surface of the page. There are no margins, text, or other markings present.

## main profiles in PhaLP

[illegible]

|   |   |
|---|---|
| 7 | 5 |
| 5 | 8 |
| 2 | 4 |





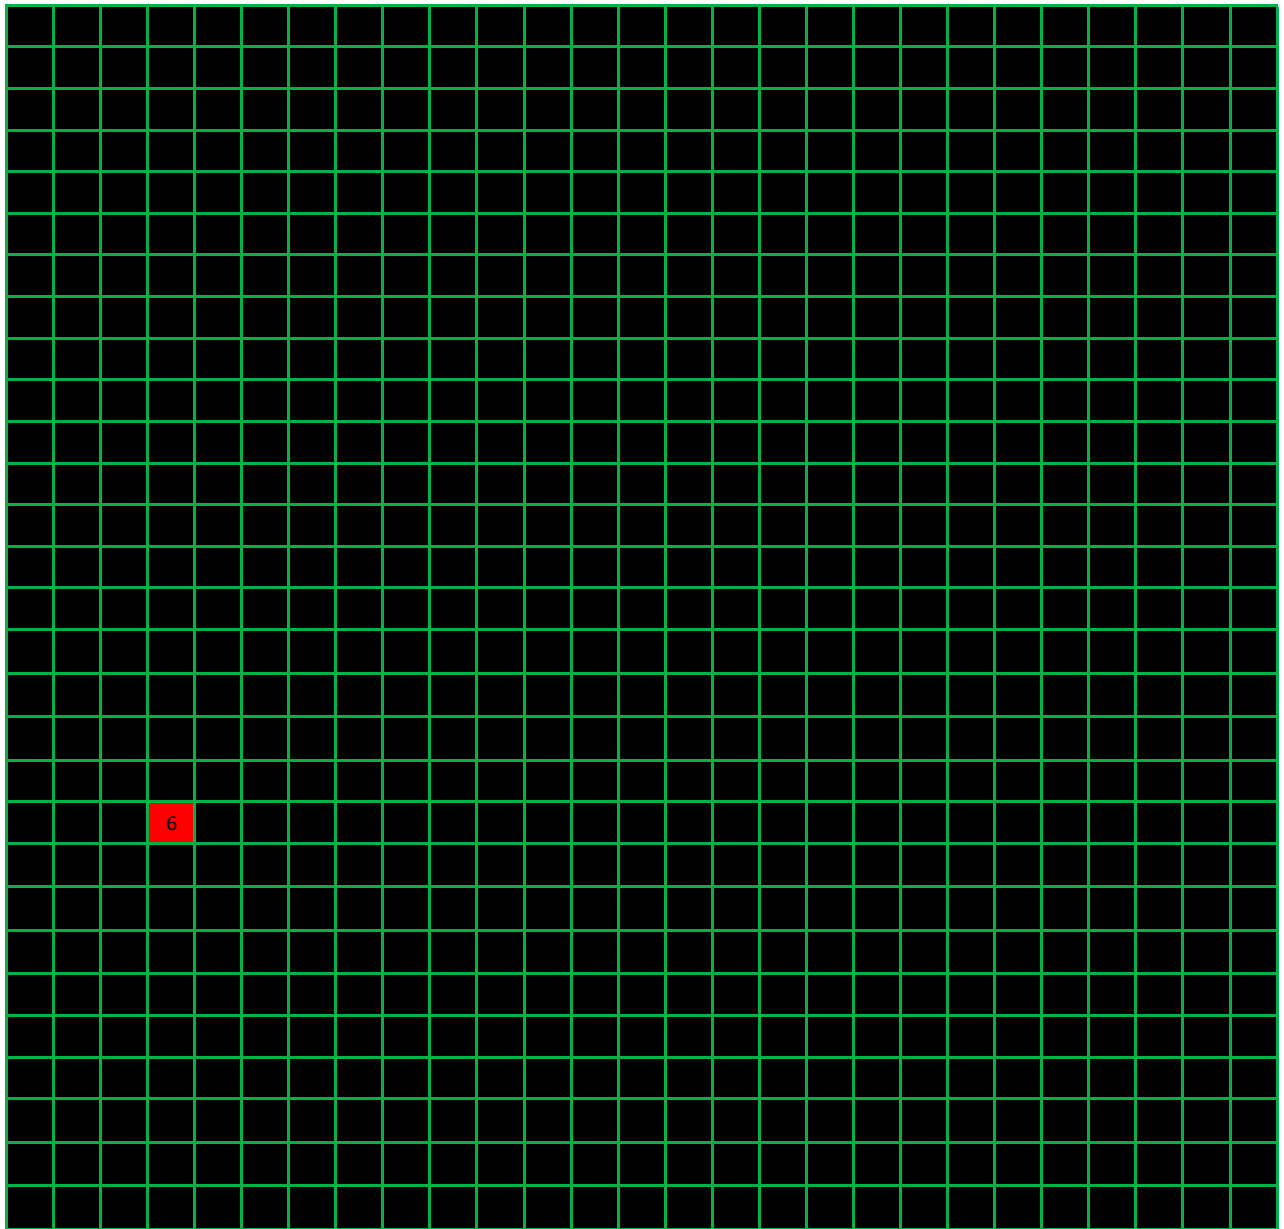



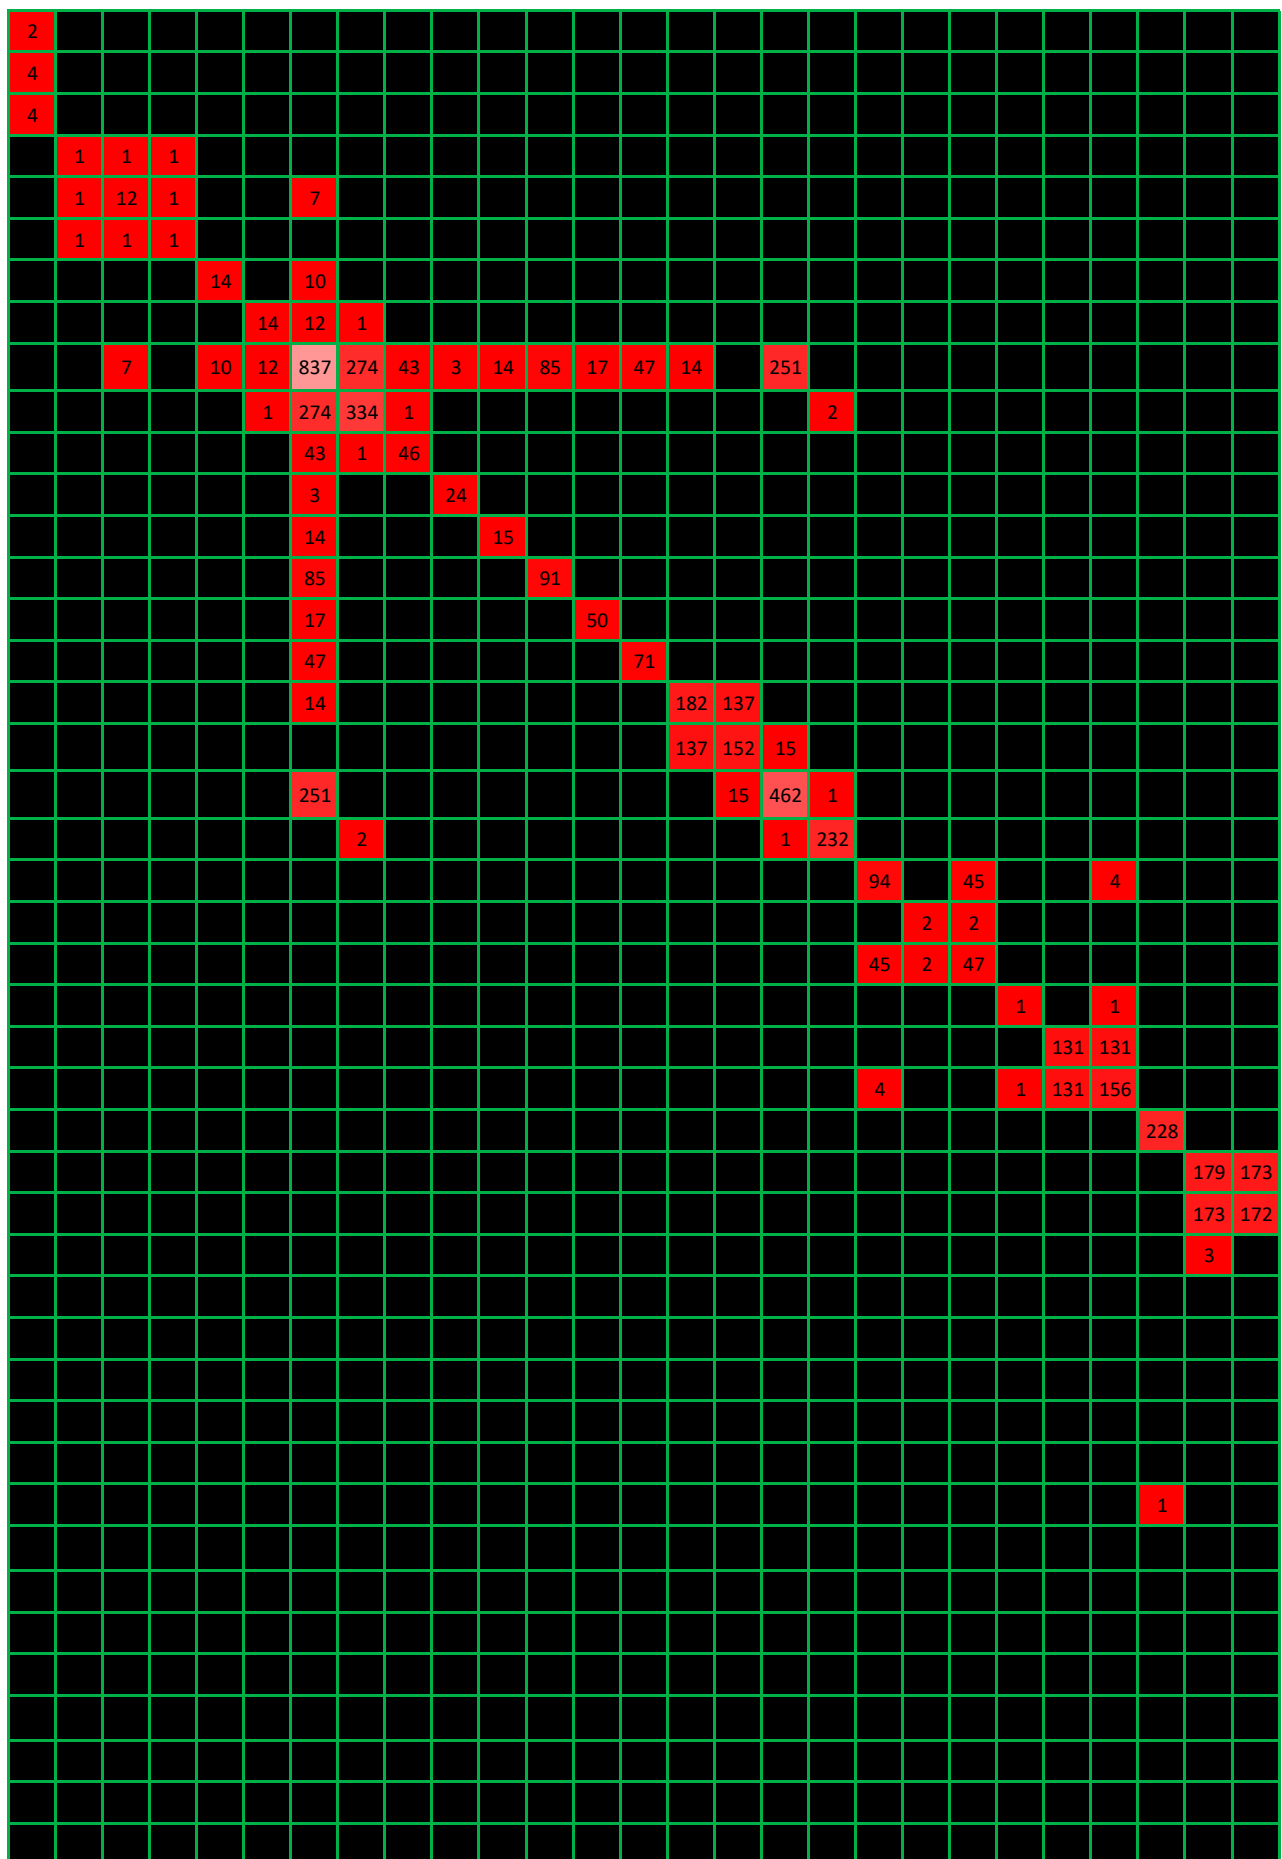





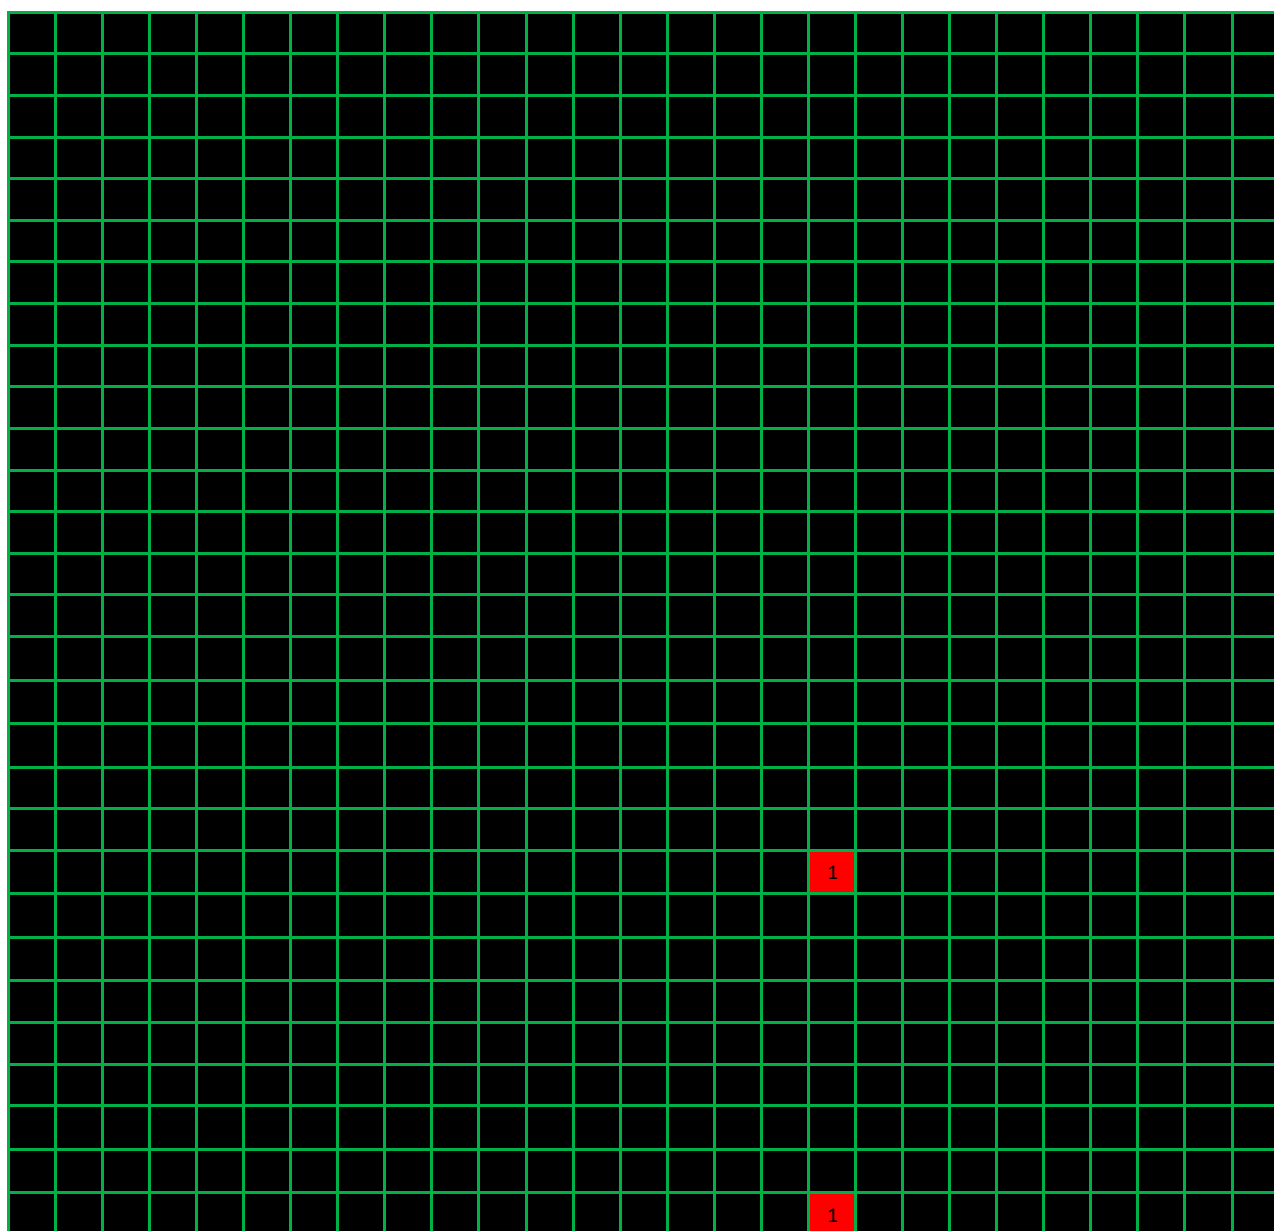

[illegible]

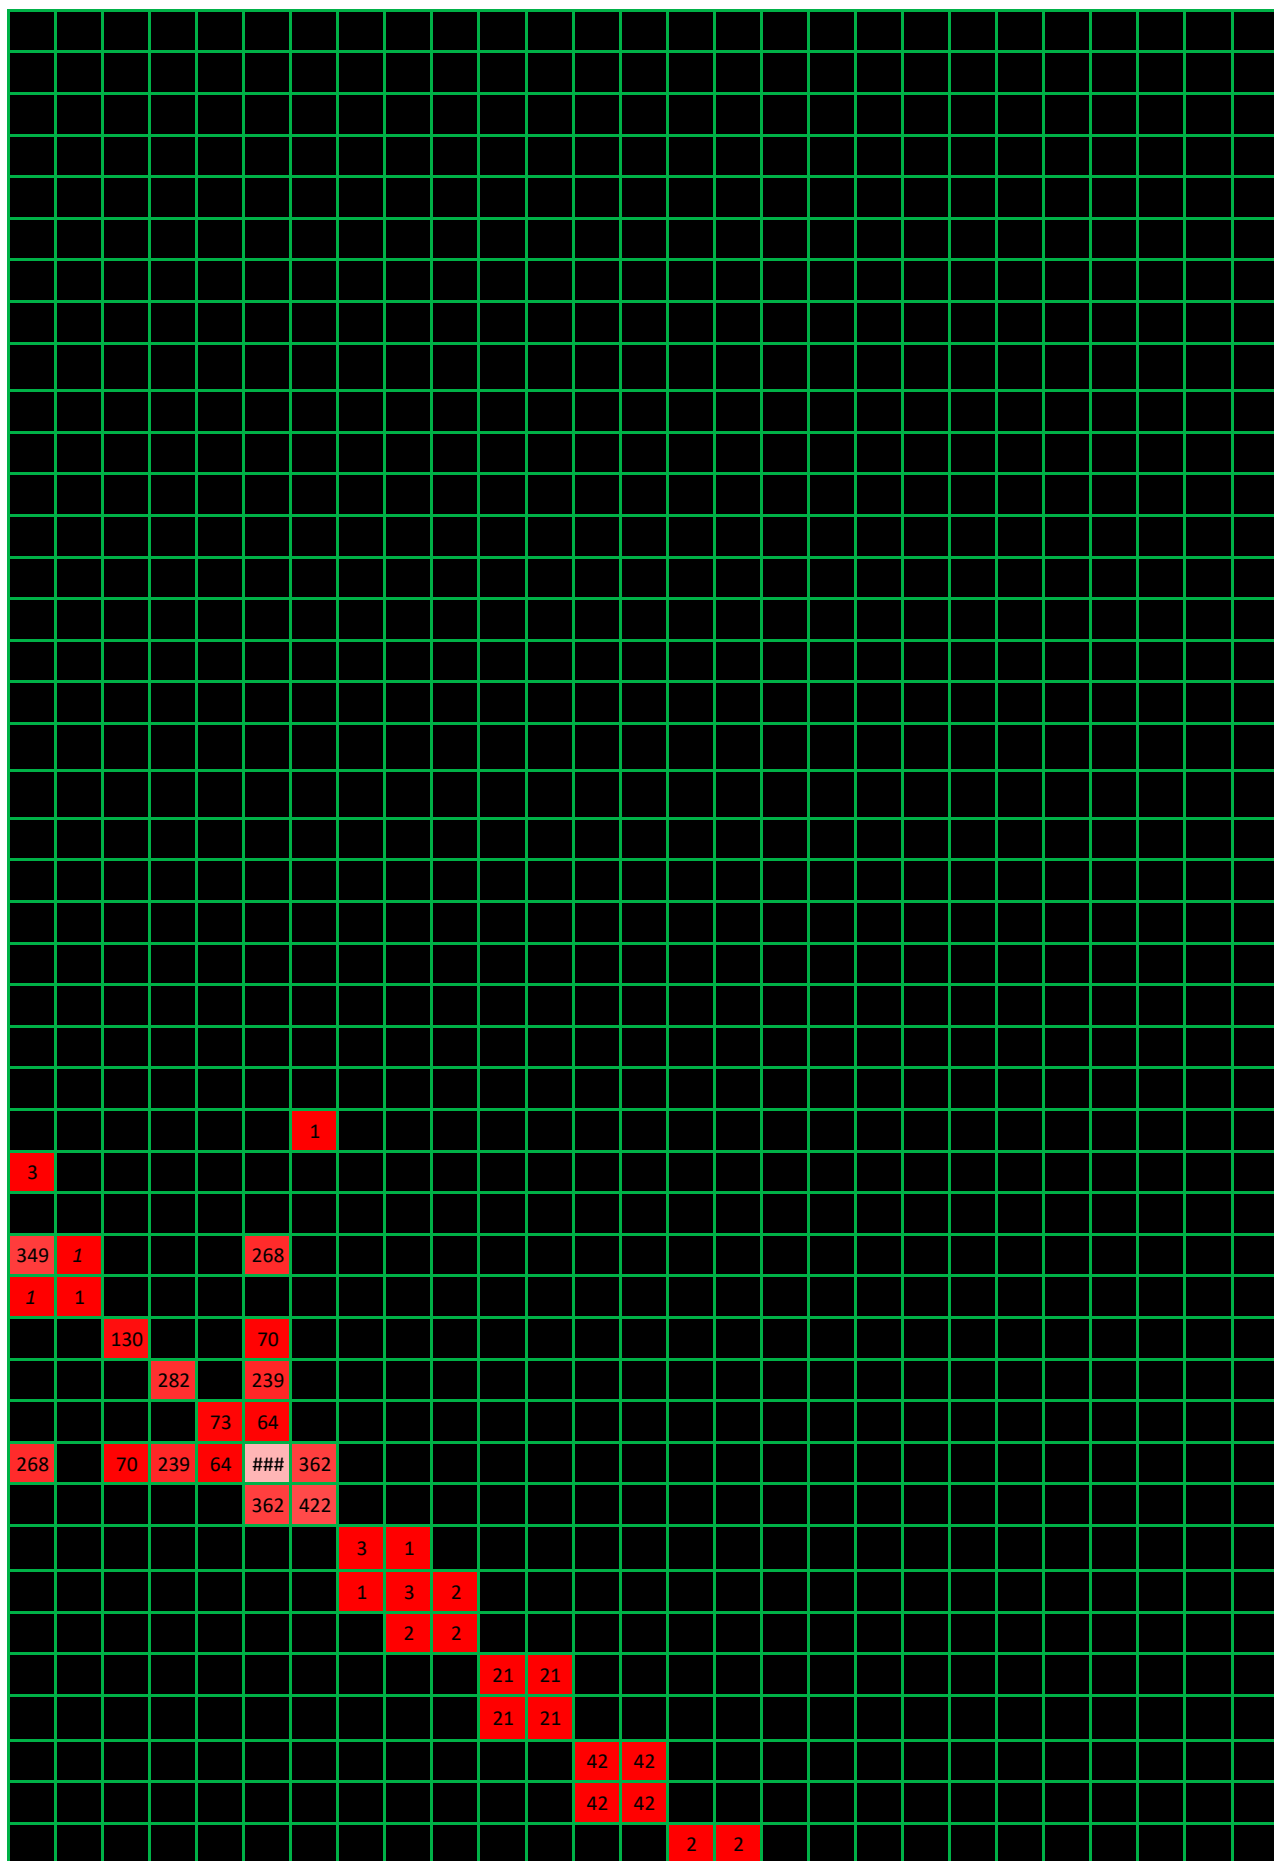

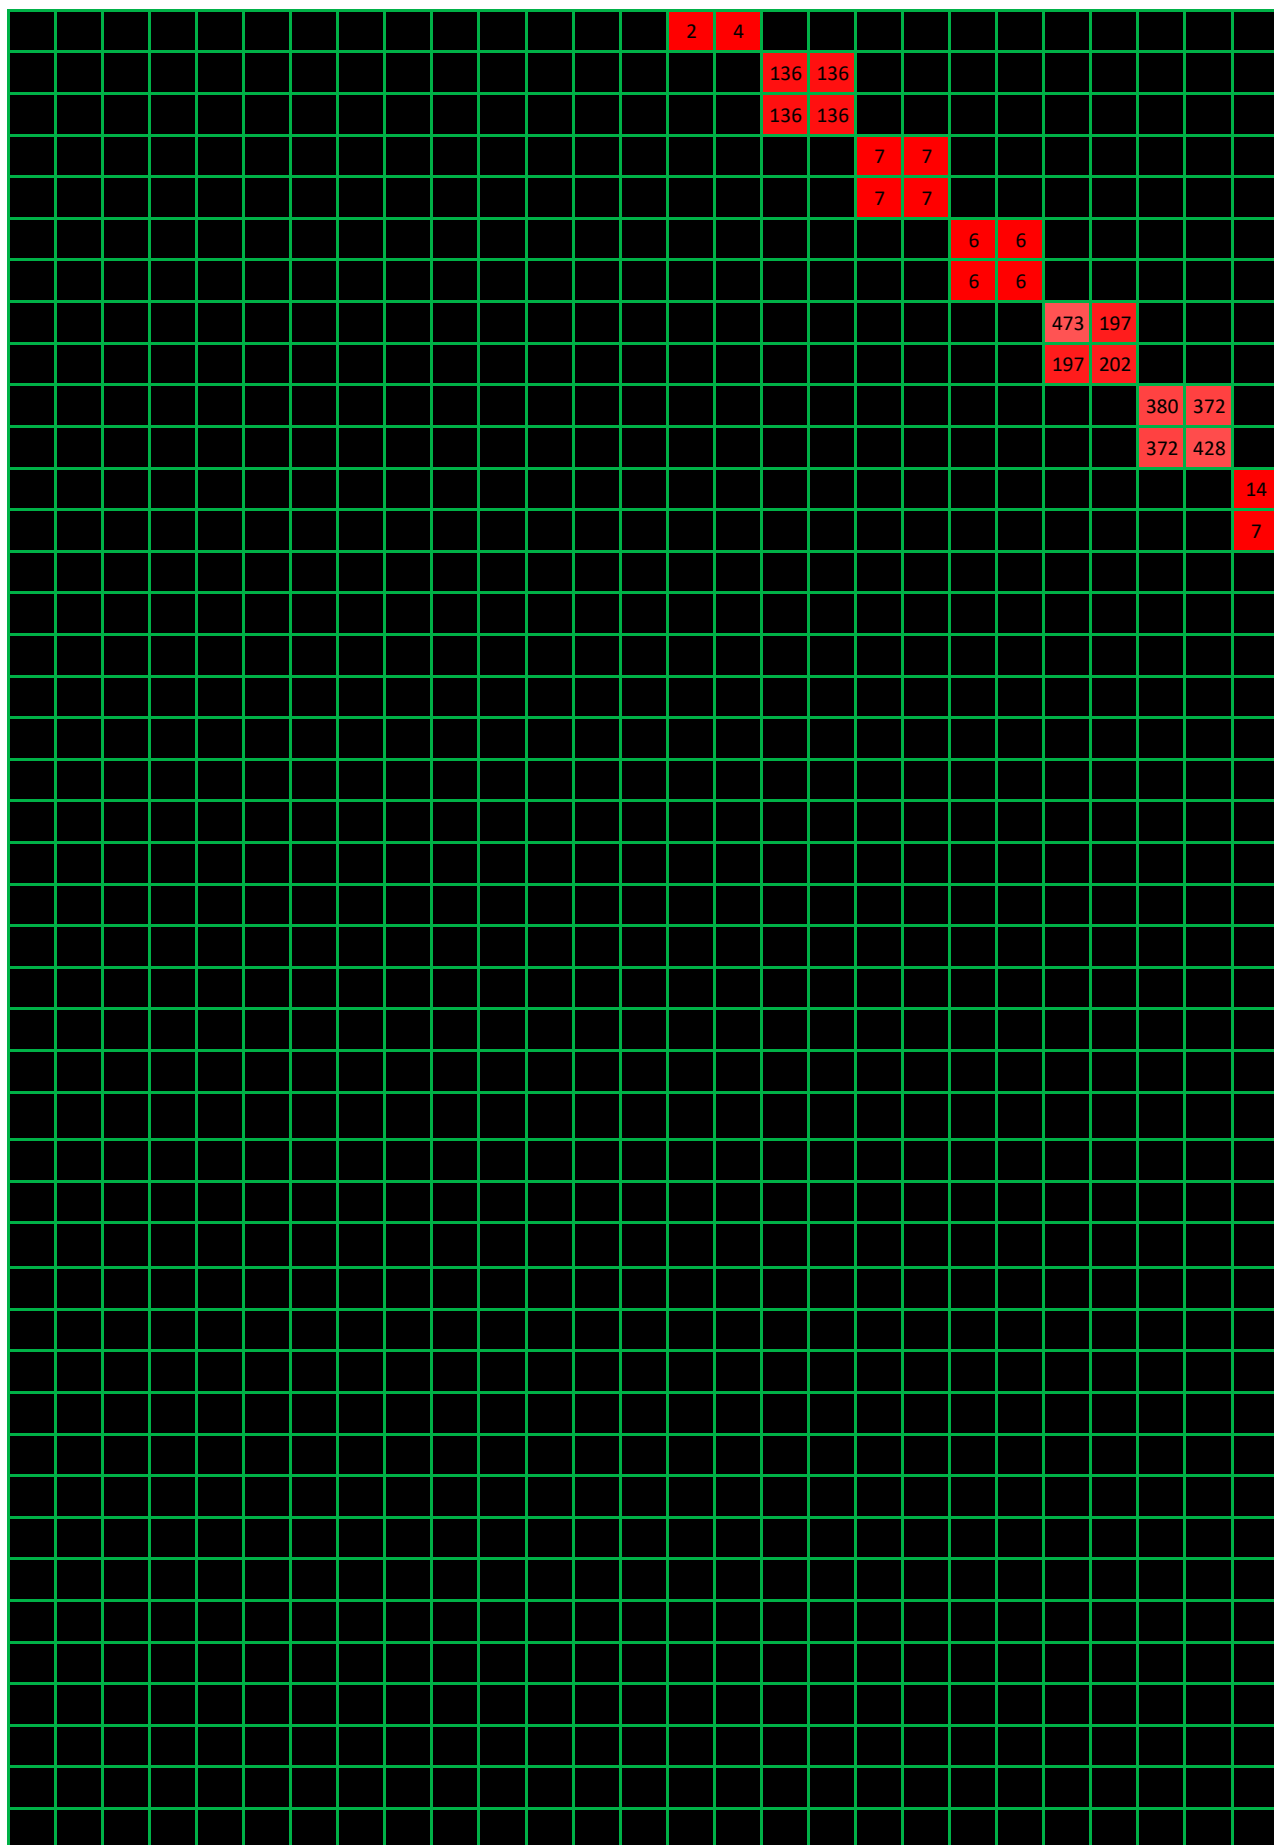





[illegible][illegible][illegible][illegible][illegible][illegible][illegible][illegible][illegible][illegible][illegible][illegible]



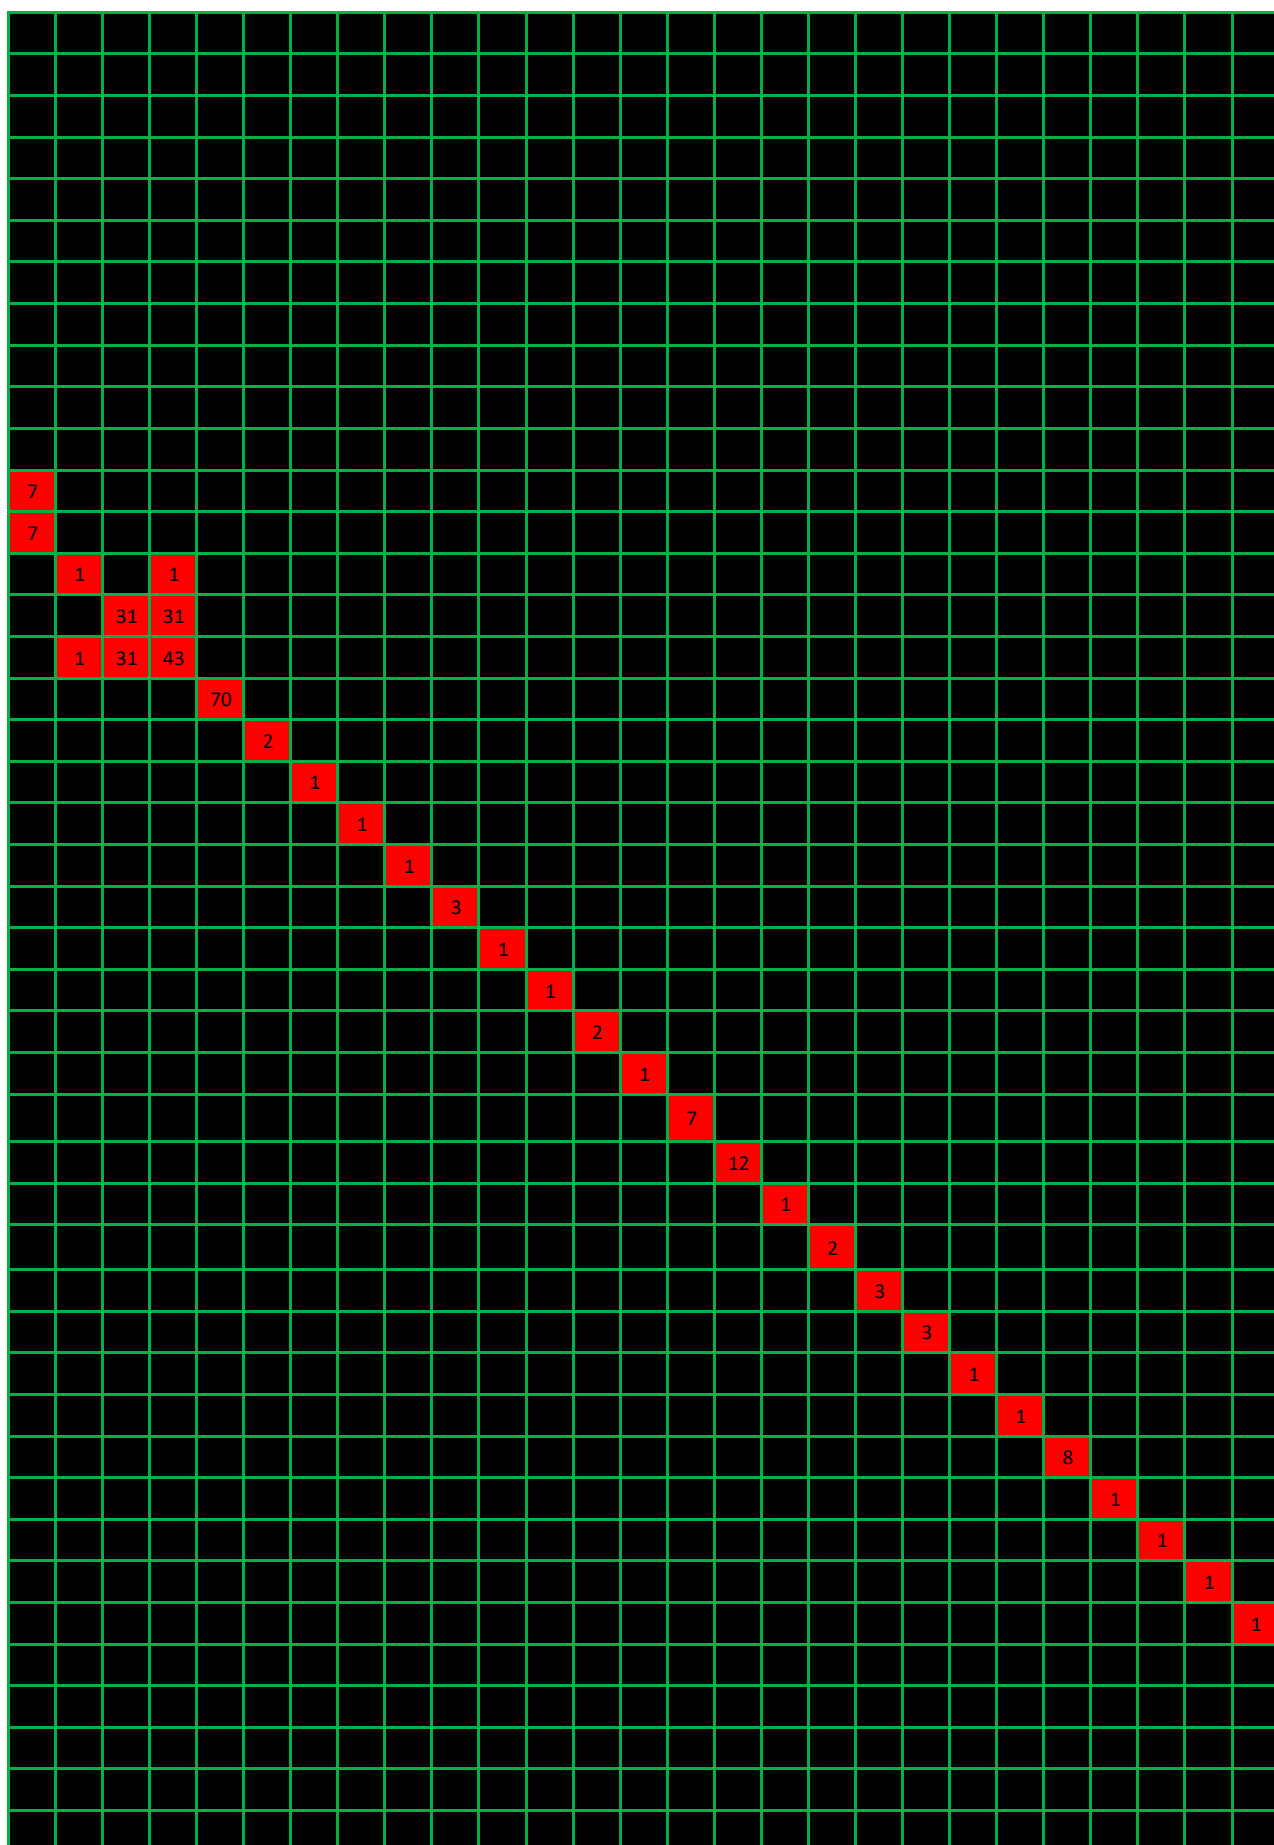





[illegible][illegible][illegible][illegible][illegible][illegible]

|  | 1 | 2 | 3 | 4 | 5 | 6 | 7 | 8 | 9 | 10 | 11 | 12 | 13 | 14 | 15 | 16 | 17 | 18 | 19 | 20 | 21 | 22 | 23 | 24 | 25 | 26 | 27 | 28 | 29 | 30 | 31 | 32 | 33 | 34 | 35 | 36 | 37 | 38 | 39 | 40 | 41 | 42 | 43 | 44 | 45 | 46 | 47 | 48 | 49 | 50 | 51 | 52 | 53 | 54 | 55 | 56 | 57 | 58 | 59 | 60 | 61 | 62 | 63 | 64 | 65 | 66 | 67 | 68 | 69 | 70 | 71 | 72 | 73 | 74 | 75 | 76 | 77 | 78 | 79 | 80 | 81 | 82 | 83 | 84 | 85 | 86 | 87 | 88 | 89 | 90 | 91 | 92 | 93 | 94 | 95 | 96 | 97 | 98 | 99 | 100 | 101 | 102 | 103 | 104 | 105 | 106 | 107 | 108 | 109 | 110 | 111 | 112 | 113 | 114 | 115 | 116 | 117 | 118 | 119 | 120 | 121 | 122 | 123 | 124 | 125 | 126 | 127 | 128 | 129 | 130 | 131 | 132 | 133 | 134 | 135 | 136 | 137 | 138 | 139 | 140 | 141 | 142 | 143 | 144 | 145 | 146 | 147 | 148 | 149 | 150 | 151 | 152 | 153 | 154 | 155 | 156 | 157 | 158 | 159 | 160 | 161 | 162 | 163 | 164 | 165 | 166 | 167 | 168 | 169 | 170 | 171 | 172 | 173 | 174 | 175 | 176 | 177 | 178 | 179 | 180 | 181 | 182 | 183 | 184 | 185 | 186 | 187 | 188 | 189 | 190 | 191 | 192 | 193 | 194 | 195 | 196 | 197 | 198 | 199 | 200 | 201 | 202 | 203 | 204 | 205 | 206 | 207 | 208 | 209 | 210 | 211 | 212 | 213 | 214 | 215 | 216 | 217 | 218 | 219 | 220 | 221 | 222 | 223 | 224 | 225 | 226 | 227 | 228 | 229 | 230 | 231 | 232 | 233 | 234 | 235 | 236 | 237 | 238 | 239 | 240 | 241 | 242 | 243 | 244 | 245 | 246 | 247 | 248 | 249 | 250 | 251 | 252 | 253 | 254 | 255 | 256 | 257 | 258 | 259 | 260 | 261 | 262 | 263 | 264 | 265 | 266 | 267 | 268 | 269 | 270 | 271 | 272 | 273 | 274 | 275 | 276 | 277 | 278 | 279 | 280 | 281 | 282 | 283 | 284 | 285 | 286 | 287 | 288 | 289 | 290 | 291 | 292 | 293 | 294 | 295 | 296 | 297 | 298 | 299 | 300 | 301 | 302 | 303 | 304 | 305 | 306 | 307 | 308 | 309 | 310 | 311 | 312 | 313 | 314 | 315 | 316 | 317 | 318 | 319 | 320 | 321 | 322 | 323 | 324 | 325 | 326 | 327 | 328 | 329 | 330 | 331 | 332 | 333 | 334 | 335 | 336 | 337 | 338 | 339 | 340 | 341 | 342 | 343 | 344 | 345 | 346 | 347 | 348 | 349 | 350 | 351 | 352 | 353 | 354 | 355 | 356 | 357 | 358 | 359 | 360 | 361 | 362 | 363 | 364 | 365 | 366 | 367 | 368 | 369 | 370 | 371 | 372 | 373 | 374 | 375 | 376 | 377 | 378 | 379 | 380 | 381 | 382 | 383 | 384 | 385 | 386 | 387 | 388 | 389 | 390 | 391 | 392 | 393 | 394 | 395 | 396 | 397 | 398 | 399 | 400 | 401 | 402 | 403 | 404 | 405 | 406 | 407 | 408 | 409 | 410 | 411 | 412 | 413 | 414 | 415 | 416 | 417 | 418 | 419 | 420 | 421 | 422 | 423 | 424 | 425 | 426 | 427 | 428 | 429 | 430 | 431 | 432 | 433 | 434 | 435 | 436 | 437 | 438 | 439 | 440 | 441 | 442 | 443 | 444 | 445 | 446 | 447 | 448 | 449 | 450 | 451 | 452 | 453 | 454 | 455 | 456 | 457 | 458 | 459 | 460 | 461 | 462 | 463 | 464 | 465 | 466 | 467 | 468 | 469 | 470 | 471 | 472 | 473 | 474 | 475 | 476 | 477 | 478 | 479 | 480 | 481 | 482 | 483 | 484 | 485 | 486 | 487 | 488 | 489 | 490 | 491 | 492 | 493 | 494 | 495 | 496 | 497 | 498 | 499 | 500 | 501 | 502 | 503 | 504 | 505 | 506 | 507 | 508 | 509 | 510 | 511 | 512 | 513 | 514 | 515 | 516 | 517 | 518 | 519 | 520 | 521 | 522 | 523 | 52 |
|--|---|---|---|---|---|---|---|---|---|----|----|----|----|----|----|----|----|----|----|----|----|----|----|----|----|----|----|----|----|----|----|----|----|----|----|----|----|----|----|----|----|----|----|----|----|----|----|----|----|----|----|----|----|----|----|----|----|----|----|----|----|----|----|----|----|----|----|----|----|----|----|----|----|----|----|----|----|----|----|----|----|----|----|----|----|----|----|----|----|----|----|----|----|----|----|----|----|----|----|-----|-----|-----|-----|-----|-----|-----|-----|-----|-----|-----|-----|-----|-----|-----|-----|-----|-----|-----|-----|-----|-----|-----|-----|-----|-----|-----|-----|-----|-----|-----|-----|-----|-----|-----|-----|-----|-----|-----|-----|-----|-----|-----|-----|-----|-----|-----|-----|-----|-----|-----|-----|-----|-----|-----|-----|-----|-----|-----|-----|-----|-----|-----|-----|-----|-----|-----|-----|-----|-----|-----|-----|-----|-----|-----|-----|-----|-----|-----|-----|-----|-----|-----|-----|-----|-----|-----|-----|-----|-----|-----|-----|-----|-----|-----|-----|-----|-----|-----|-----|-----|-----|-----|-----|-----|-----|-----|-----|-----|-----|-----|-----|-----|-----|-----|-----|-----|-----|-----|-----|-----|-----|-----|-----|-----|-----|-----|-----|-----|-----|-----|-----|-----|-----|-----|-----|-----|-----|-----|-----|-----|-----|-----|-----|-----|-----|-----|-----|-----|-----|-----|-----|-----|-----|-----|-----|-----|-----|-----|-----|-----|-----|-----|-----|-----|-----|-----|-----|-----|-----|-----|-----|-----|-----|-----|-----|-----|-----|-----|-----|-----|-----|-----|-----|-----|-----|-----|-----|-----|-----|-----|-----|-----|-----|-----|-----|-----|-----|-----|-----|-----|-----|-----|-----|-----|-----|-----|-----|-----|-----|-----|-----|-----|-----|-----|-----|-----|-----|-----|-----|-----|-----|-----|-----|-----|-----|-----|-----|-----|-----|-----|-----|-----|-----|-----|-----|-----|-----|-----|-----|-----|-----|-----|-----|-----|-----|-----|-----|-----|-----|-----|-----|-----|-----|-----|-----|-----|-----|-----|-----|-----|-----|-----|-----|-----|-----|-----|-----|-----|-----|-----|-----|-----|-----|-----|-----|-----|-----|-----|-----|-----|-----|-----|-----|-----|-----|-----|-----|-----|-----|-----|-----|-----|-----|-----|-----|-----|-----|-----|-----|-----|-----|-----|-----|-----|-----|-----|-----|-----|-----|-----|-----|-----|-----|-----|-----|-----|-----|-----|-----|-----|-----|-----|-----|-----|-----|-----|-----|-----|-----|-----|-----|-----|-----|-----|-----|-----|-----|-----|-----|-----|-----|-----|-----|-----|-----|-----|-----|-----|-----|-----|-----|-----|-----|-----|-----|-----|-----|-----|-----|-----|-----|-----|-----|-----|-----|-----|-----|-----|-----|-----|-----|-----|-----|-----|-----|-----|-----|-----|-----|-----|-----|-----|-----|-----|-----|-----|-----|-----|-----|-----|-----|-----|-----|-----|-----|-----|-----|-----|-----|-----|-----|-----|-----|-----|-----|-----|-----|-----|-----|-----|-----|-----|-----|-----|-----|-----|-----|-----|-----|-----|-----|-----|-----|----|
|--|---|---|---|---|---|---|---|---|---|----|----|----|----|----|----|----|----|----|----|----|----|----|----|----|----|----|----|----|----|----|----|----|----|----|----|----|----|----|----|----|----|----|----|----|----|----|----|----|----|----|----|----|----|----|----|----|----|----|----|----|----|----|----|----|----|----|----|----|----|----|----|----|----|----|----|----|----|----|----|----|----|----|----|----|----|----|----|----|----|----|----|----|----|----|----|----|----|----|----|-----|-----|-----|-----|-----|-----|-----|-----|-----|-----|-----|-----|-----|-----|-----|-----|-----|-----|-----|-----|-----|-----|-----|-----|-----|-----|-----|-----|-----|-----|-----|-----|-----|-----|-----|-----|-----|-----|-----|-----|-----|-----|-----|-----|-----|-----|-----|-----|-----|-----|-----|-----|-----|-----|-----|-----|-----|-----|-----|-----|-----|-----|-----|-----|-----|-----|-----|-----|-----|-----|-----|-----|-----|-----|-----|-----|-----|-----|-----|-----|-----|-----|-----|-----|-----|-----|-----|-----|-----|-----|-----|-----|-----|-----|-----|-----|-----|-----|-----|-----|-----|-----|-----|-----|-----|-----|-----|-----|-----|-----|-----|-----|-----|-----|-----|-----|-----|-----|-----|-----|-----|-----|-----|-----|-----|-----|-----|-----|-----|-----|-----|-----|-----|-----|-----|-----|-----|-----|-----|-----|-----|-----|-----|-----|-----|-----|-----|-----|-----|-----|-----|-----|-----|-----|-----|-----|-----|-----|-----|-----|-----|-----|-----|-----|-----|-----|-----|-----|-----|-----|-----|-----|-----|-----|-----|-----|-----|-----|-----|-----|-----|-----|-----|-----|-----|-----|-----|-----|-----|-----|-----|-----|-----|-----|-----|-----|-----|-----|-----|-----|-----|-----|-----|-----|-----|-----|-----|-----|-----|-----|-----|-----|-----|-----|-----|-----|-----|-----|-----|-----|-----|-----|-----|-----|-----|-----|-----|-----|-----|-----|-----|-----|-----|-----|-----|-----|-----|-----|-----|-----|-----|-----|-----|-----|-----|-----|-----|-----|-----|-----|-----|-----|-----|-----|-----|-----|-----|-----|-----|-----|-----|-----|-----|-----|-----|-----|-----|-----|-----|-----|-----|-----|-----|-----|-----|-----|-----|-----|-----|-----|-----|-----|-----|-----|-----|-----|-----|-----|-----|-----|-----|-----|-----|-----|-----|-----|-----|-----|-----|-----|-----|-----|-----|-----|-----|-----|-----|-----|-----|-----|-----|-----|-----|-----|-----|-----|-----|-----|-----|-----|-----|-----|-----|-----|-----|-----|-----|-----|-----|-----|-----|-----|-----|-----|-----|-----|-----|-----|-----|-----|-----|-----|-----|-----|-----|-----|-----|-----|-----|-----|-----|-----|-----|-----|-----|-----|-----|-----|-----|-----|-----|-----|-----|-----|-----|-----|-----|-----|-----|-----|-----|-----|-----|-----|-----|-----|-----|-----|-----|-----|-----|-----|-----|-----|-----|-----|-----|-----|-----|-----|-----|-----|-----|-----|-----|-----|-----|-----|-----|-----|-----|-----|-----|-----|-----|-----|-----|-----|-----|-----|-----|-----|-----|-----|-----|-----|-----|-----|-----|-----|-----|-----|-----|-----|----|

[illegible][illegible][illegible][illegible][illegible]



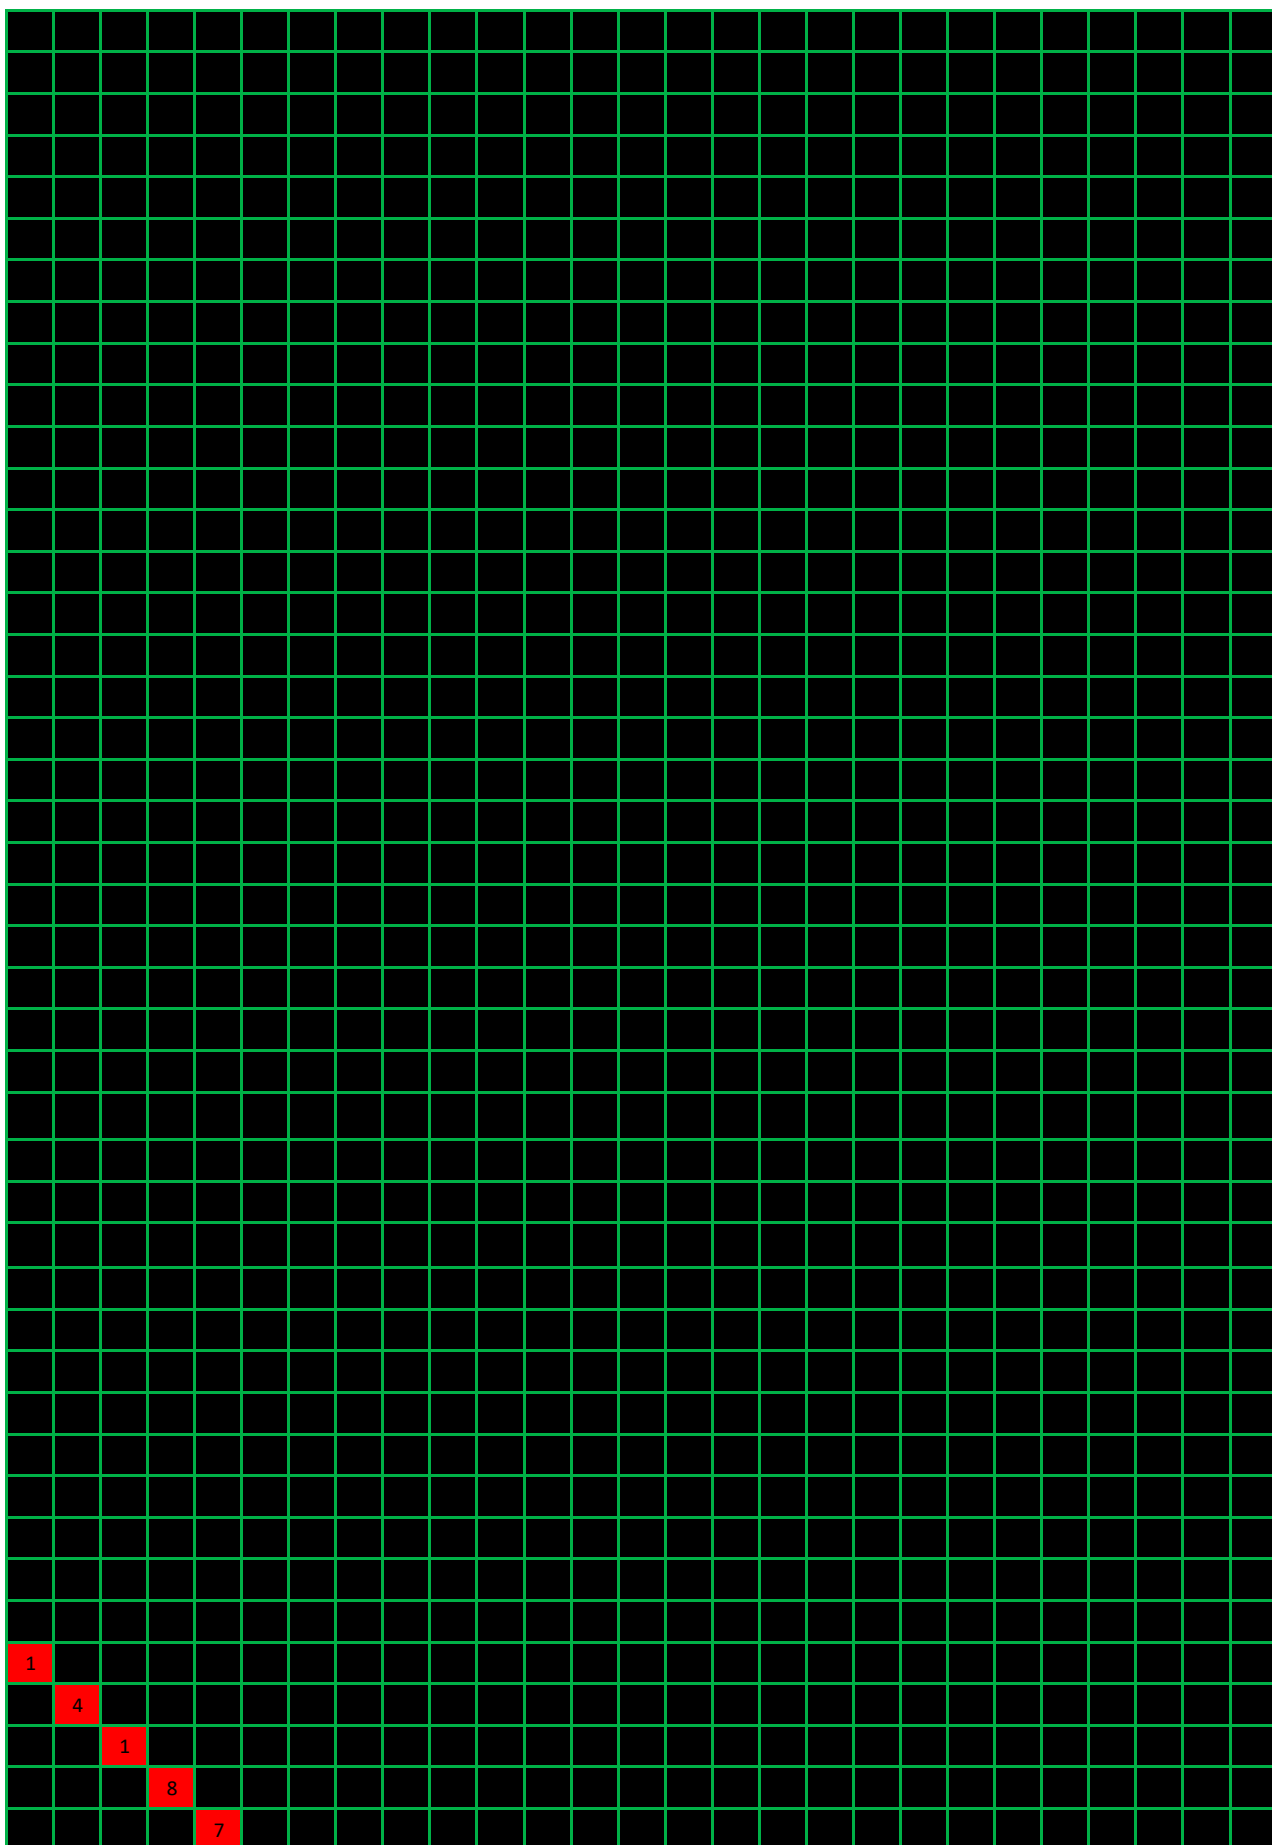

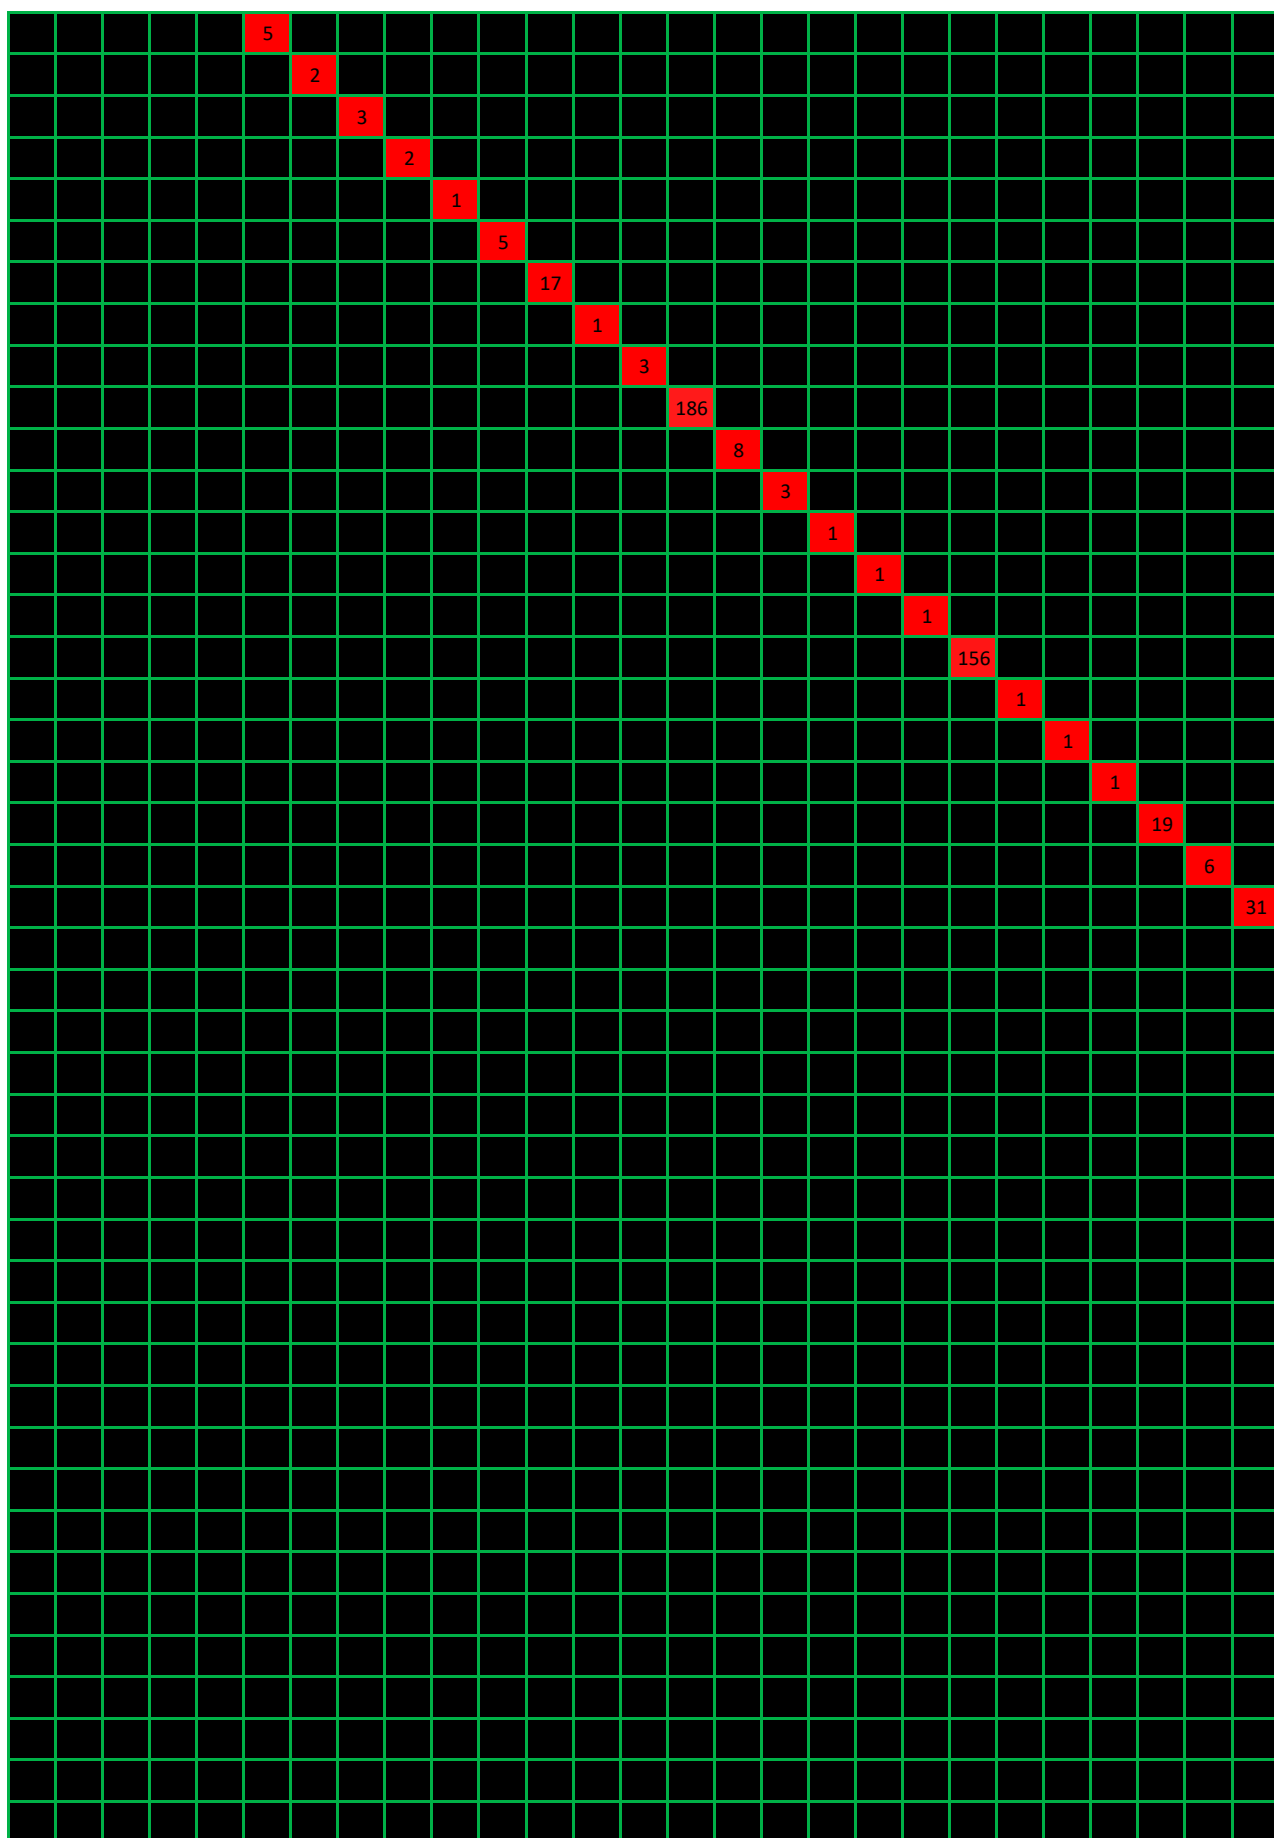









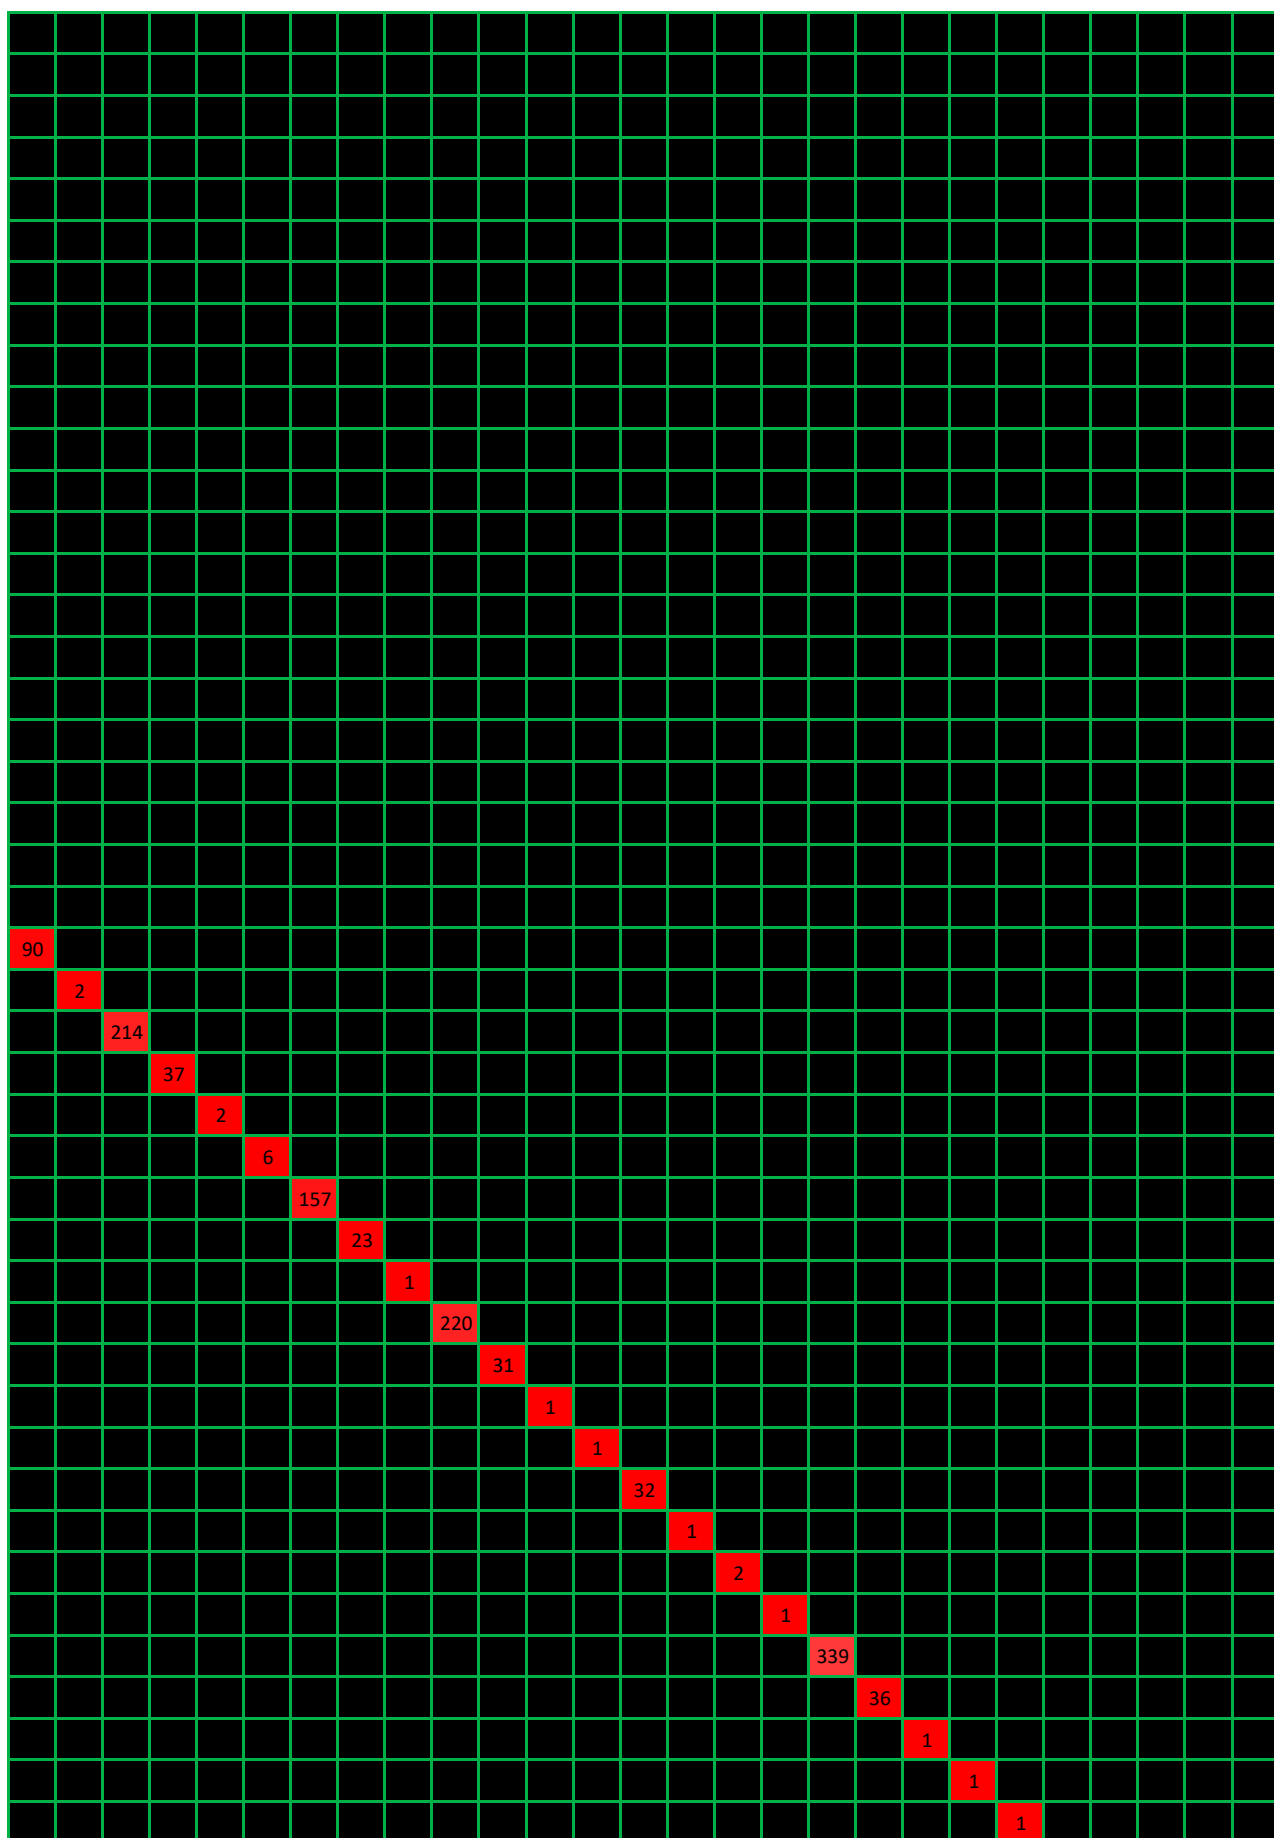

A 20x20 grid with a black background and green grid lines. A diagonal sequence of red squares is located in the top right corner, containing the numbers 1, 1, 6, 230, and 1 from top-left to bottom-right.

[illegible]

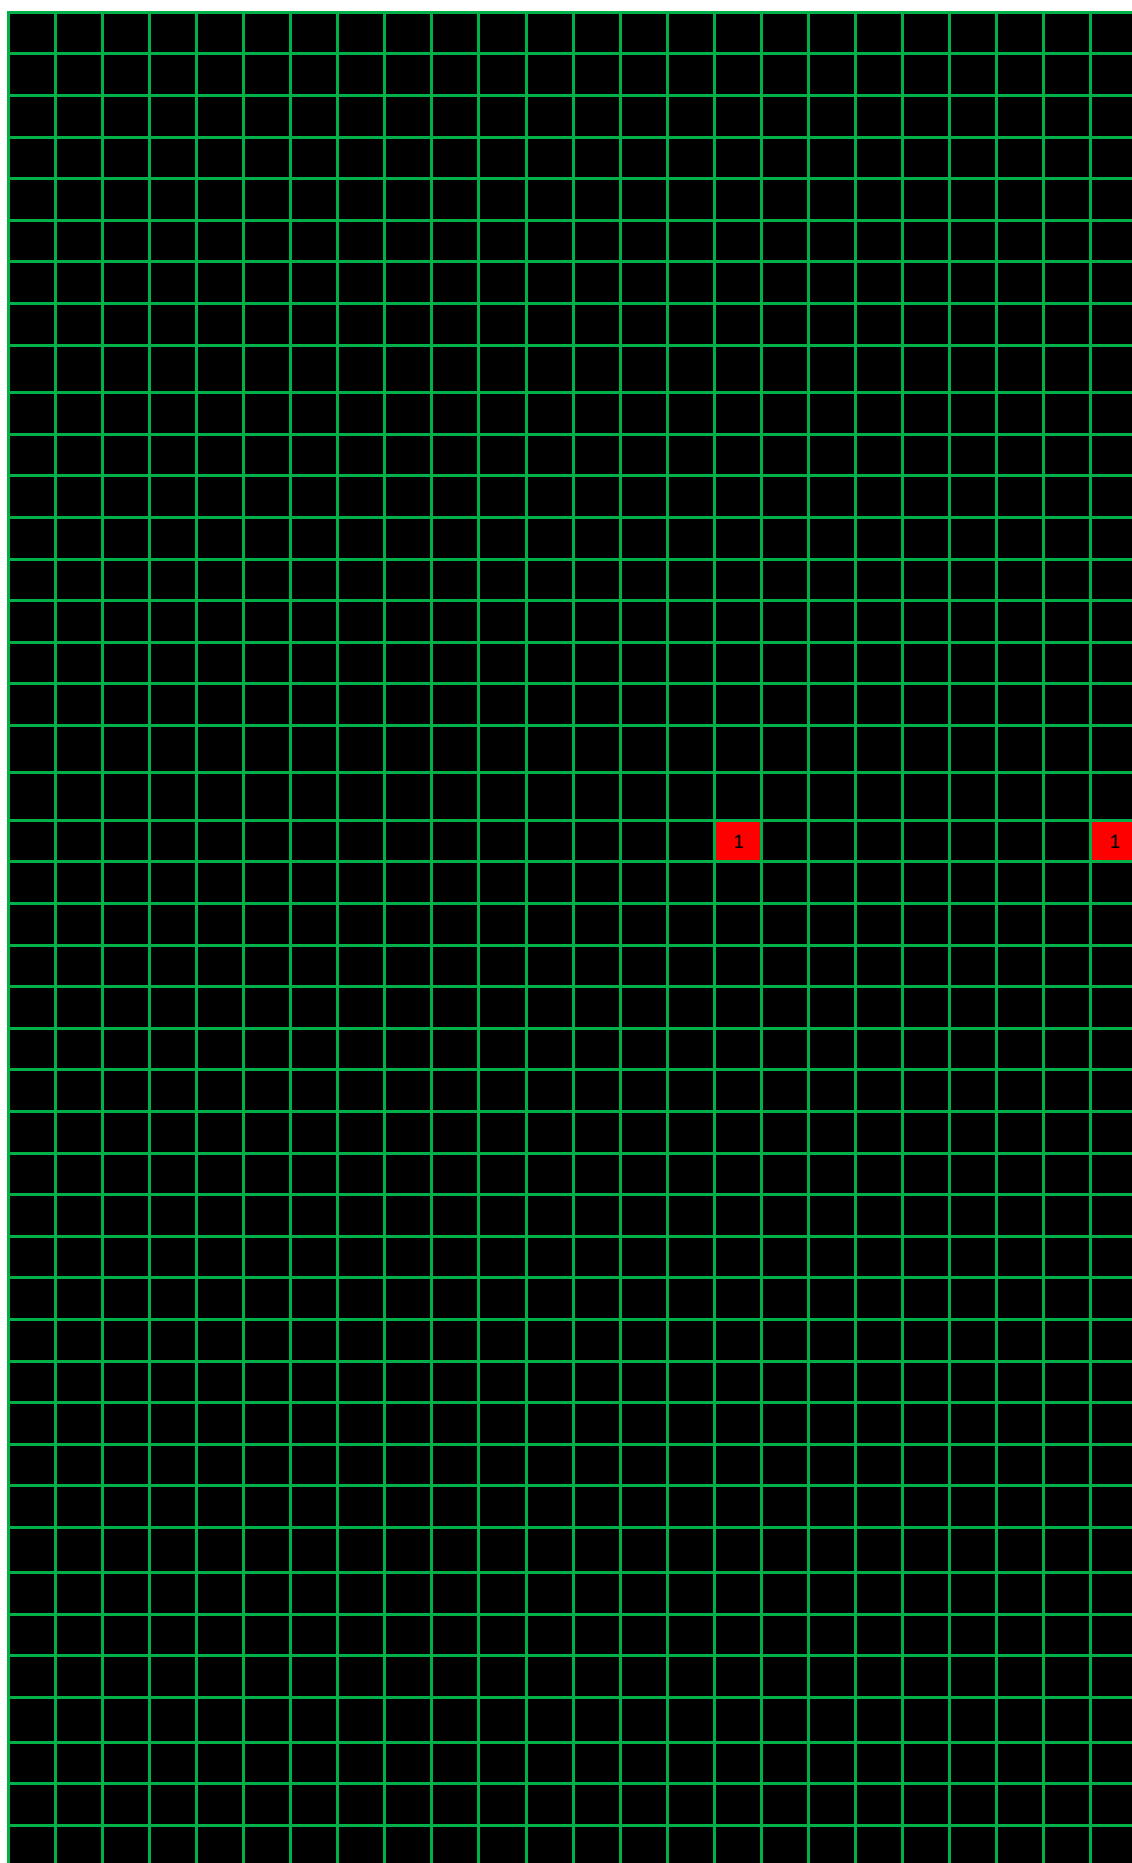

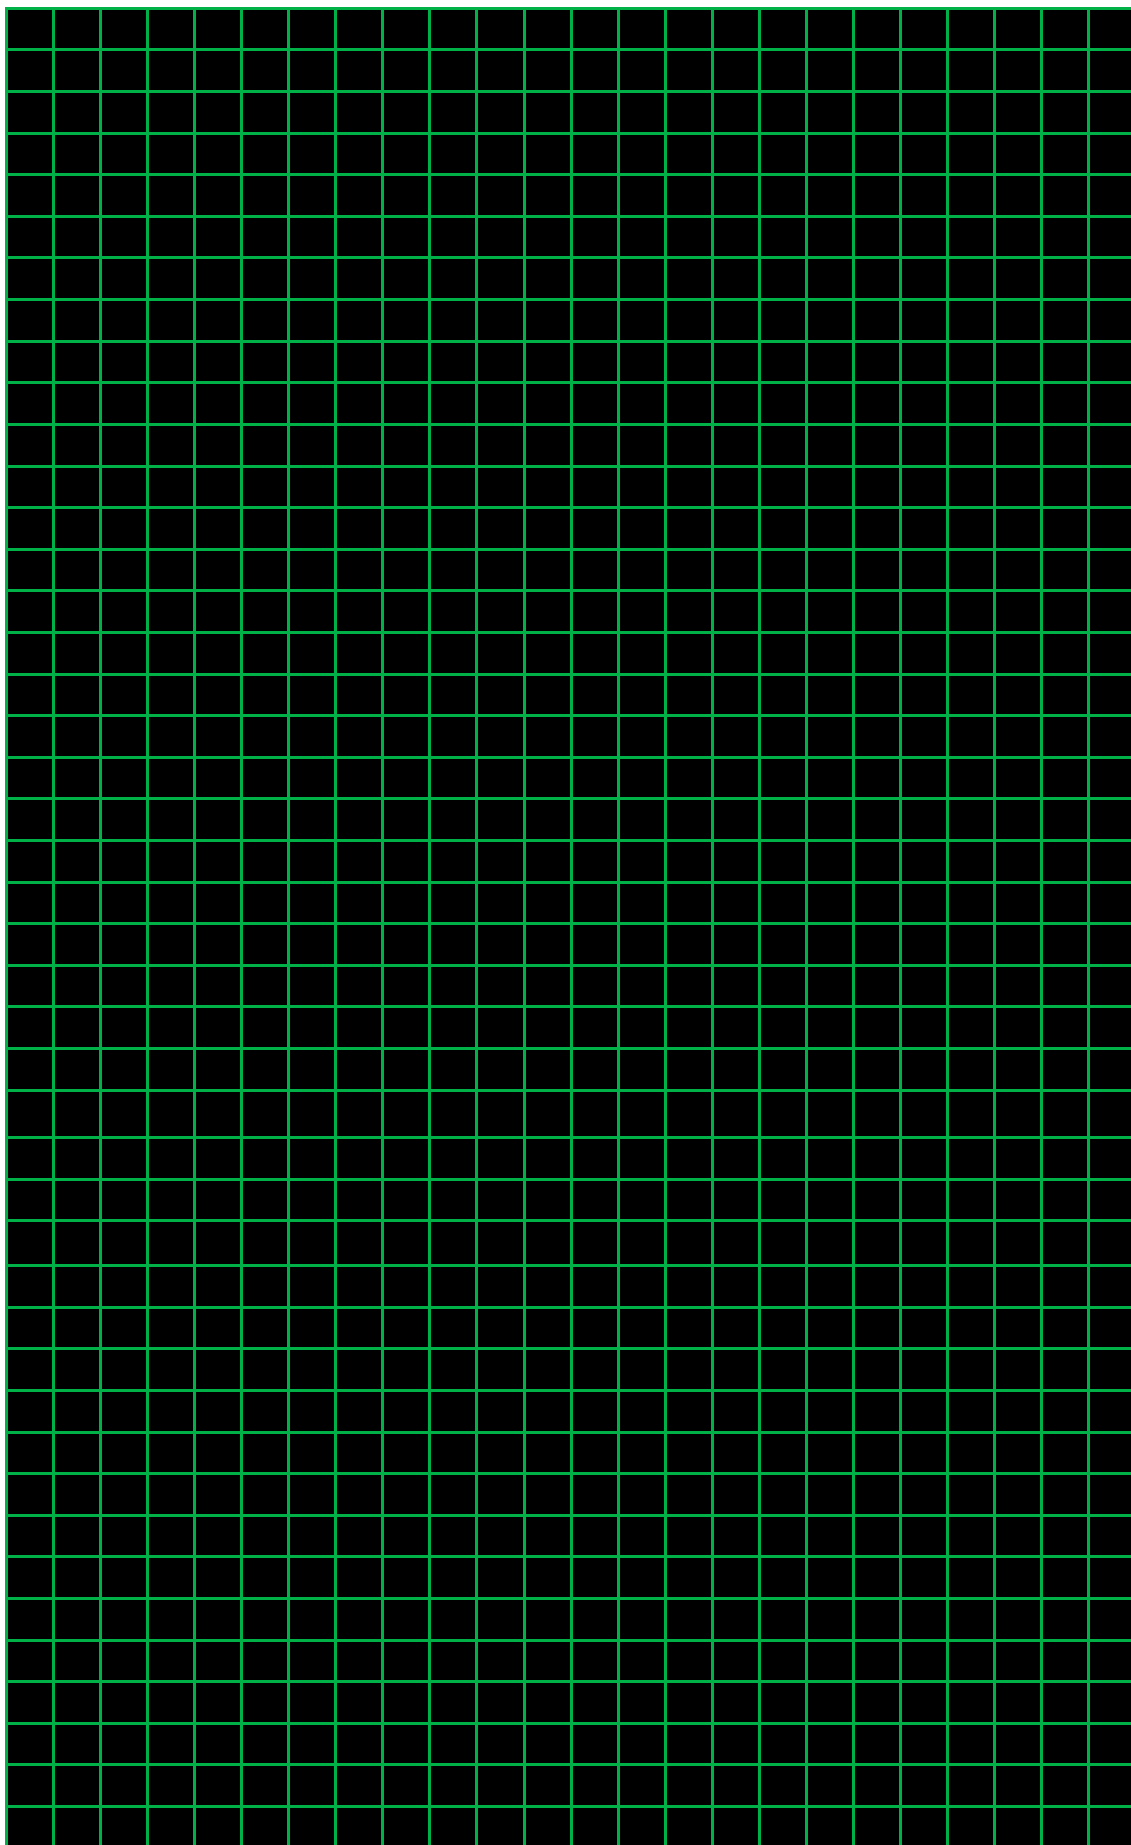

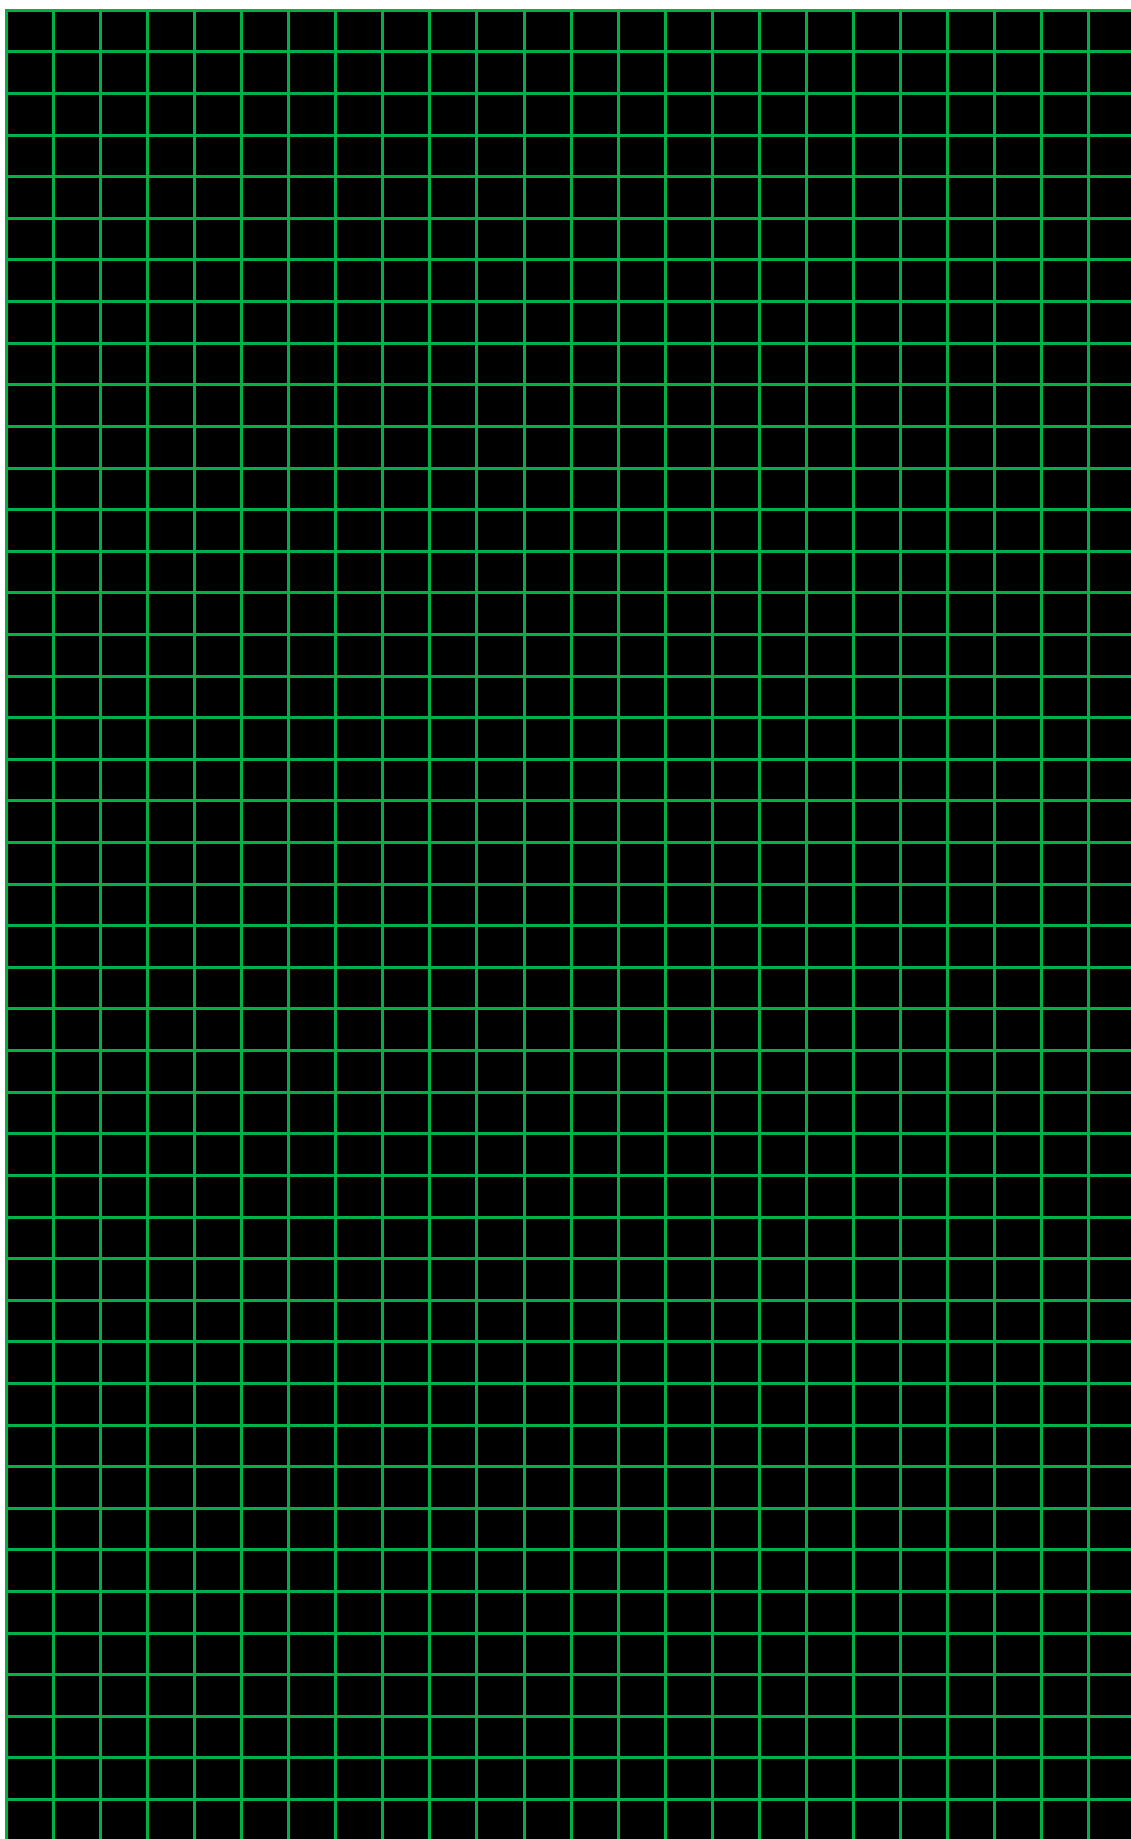

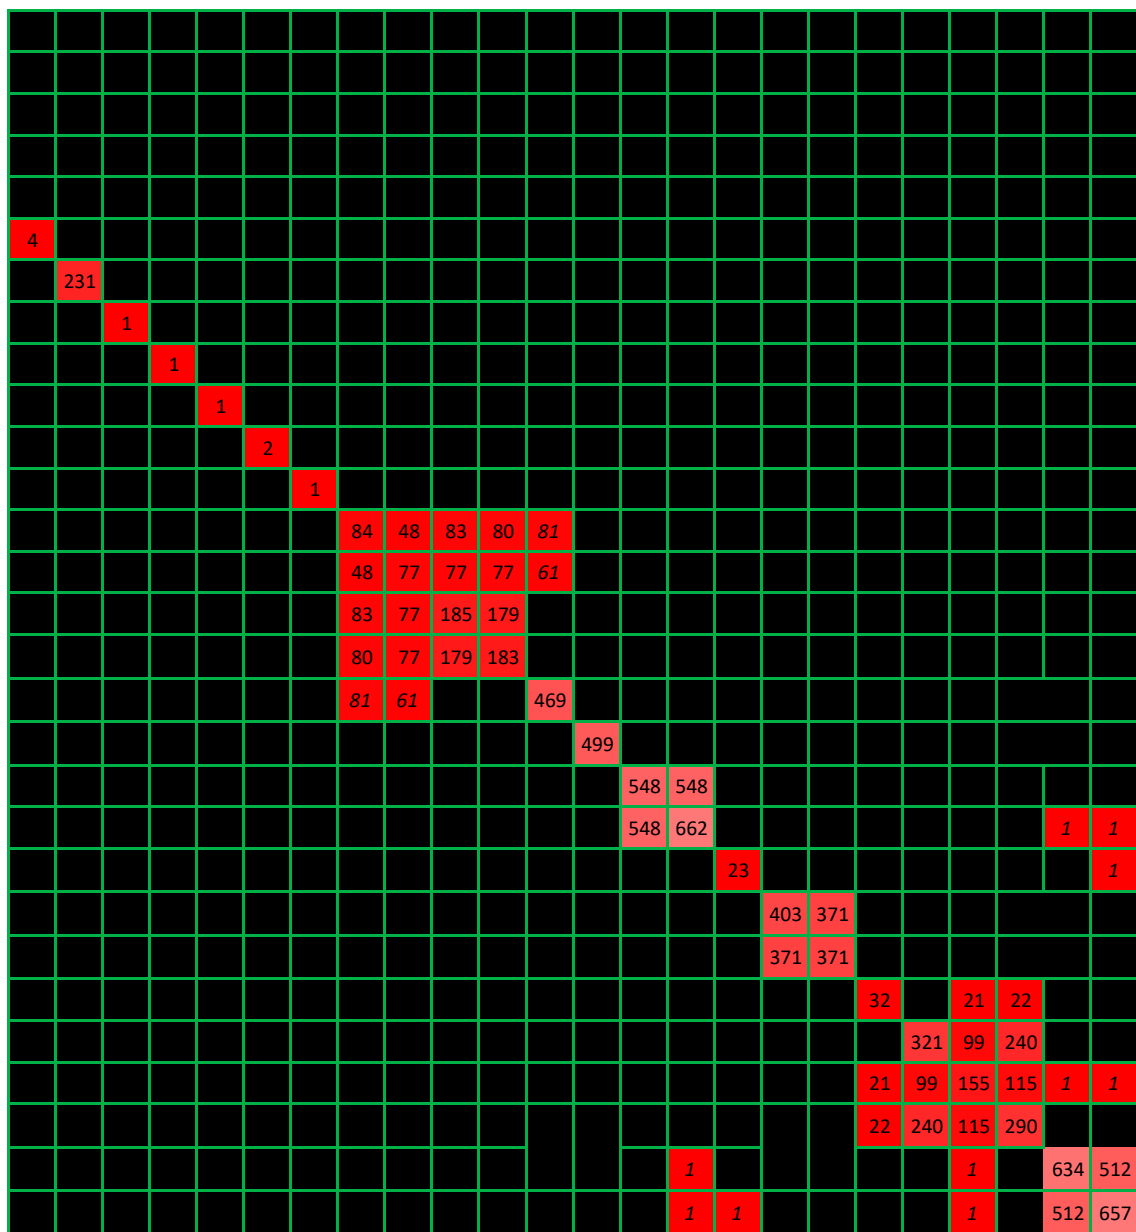

Supplement: s1 [file s1]
