# Supplementary material for: PhaLP: A Database for the Study of Phage Lytic Proteins and Their Evolution
Source: MDPI journal article supplement (doi:10.3390/v13071240), 2021-06-26
Supplement: s1 [file s1]

| <b>Class<br/>Name</b>      | <b>Name</b>                |
|----------------------------|----------------------------|
| <b>Actinobacteria</b>      | <b>Corynebacteriales</b>   |
|                            | <b>Micrococcales</b>       |
|                            | <b>Propionibacteriales</b> |
|                            | <b>Streptomycetales</b>    |
| <b>Cyanophyceae</b>        | <b>Synechococcales</b>     |
| <b>Bacilli</b>             | <b>Bacillales</b>          |
|                            | <b>Lactobacillales</b>     |
| <b>Gammaproteobacteria</b> | <b>Aeromonadales</b>       |
|                            | <b>Enterobacterales</b>    |
|                            | <b>Pseudomonadales</b>     |
|                            | <b>Vibrionales</b>         |

## Order Rule

---

[GH19|PET\_M23|DUF1906][Ami\_2|PET\_C39|GH25]{0,1}[LGFP|PG\_1|RECA\_3]{0,1}

[PET\_M15|PET\_M23|LysM][LysM|CW\_7]{0,1}[Ami\_2|PG\_1]{0,1}

[Ami\_2][PG\_1]

[Ami\_2|SLT\_related|CHAP][SLT\_related|LysM|PG\_1]

---

[YkuD|PET\_C70|PET\_C39][YkuD|GH24]{0,1}[GLUCO|GH19]{0,1}

---

[Ami\_2|SH3|Ami\_3][CHAP|LysM|Ami02\_C]{0,1}[SH3|PG\_1|PSA\_CBD]{0,1}

[CHAP|GH25|Ami\_5][Ami\_2|CW\_1|SH3]{0,1}[LysM|ZoocinA\_TRD|CW\_7]{0,1}

---

[PET\_M15|GH108|GH19][GH24]{0,1}[PG\_3]{0,1}

[GH108|MUR|NUDIX][GH24]{0,1}[PG\_3]{0,1}

[SLT\_related|GH108|MUR][PG\_3]{0,1}[AA\_TRNA\_LIGASE\_II\_GLYAB]{0,1}

[GH108|Pesticin\_C|NLPC\_P60][GH108]{0,1}[PG\_3]{0,1}

---

| F-score | Support | Name                        |
|---------|---------|-----------------------------|
| 0.65217 | 1743    | <b>Gordoniaceae</b>         |
|         |         | <b>Mycobacteriaceae</b>     |
|         |         | <b>Nocardiaceae</b>         |
| 0.47972 | 312     | <b>Microbacteriaceae</b>    |
|         |         | <b>Micrococcaceae</b>       |
| 0.37500 | 127     | <b>Propionibacteriaceae</b> |
| 0.57576 | 176     | <b>Streptomyetaceae</b>     |
| 0.56962 | 147     | <b>Synechococcaceae</b>     |
| 0.59119 | 617     | <b>Bacillaceae</b>          |
|         |         | <b>Listeriaceae</b>         |
|         |         | <b>Paenibacillaceae</b>     |
|         |         | <b>Staphylococcaceae</b>    |
|         |         | <b>Enterococcaceae</b>      |
| 0.58915 | 839     | <b>Streptococcaceae</b>     |
| 0.34286 | 67      | <b>Aeromonadaceae</b>       |
| 0.52941 | 1416    | <b>Enterobacteriaceae</b>   |
|         |         | <b>Erwiniaceae</b>          |
|         |         | <b>Pectobacteriaceae</b>    |
| 0.47458 | 394     | <b>Moraxellaceae</b>        |
|         |         | <b>Pseudomonadaceae</b>     |
| 0.42857 | 269     | <b>Vibrionaceae</b>         |

| Family                                                             |         |
|--------------------------------------------------------------------|---------|
| Rule                                                               | F-score |
| [PET_M23 DUF1906 LGFP][Ami_2 RECA_3]{0,1}[PET_M23 LGFP]{0,1}       | 0.64020 |
| [PET_M15 GH19 PET_C39][GH19 Ami_2]{0,1}[PG_1 SLT_related]{0,1}     | 0.62687 |
| [LGFP PET_M23 PET_M15][LGFP LysM]{0,1}[GH25 PG_1]{0,1}             | 0.46612 |
| [PET_M15 CW_7][LysM Ami_2 PG_1]                                    | 0.45714 |
| [PET_M23 CHAP GH25][LysM Ami_2 PG_1]                               | 0.51948 |
| [Ami_2][PG_1]                                                      | 0.37500 |
| [Ami_2 SLT_related CHAP][SLT_related LysM PG_1]                    | 0.57576 |
| [YkuD PET_C70 PET_C39][YkuD GH24]{0,1}[GLUCO GH19]{0,1}            | 0.56962 |
| [GH25 Ami_2 Ami_3][LysM SH3 Ami02_C]{0,1}[PG_1 DUF3597 SPOR]{0,1}  | 0.53066 |
| [Ami_2 PET_M15 Ami_3][PSA_CBD SH3]                                 | 0.56604 |
| [GLUCO Ami_2][Ami_3 Cu_amine_oxidN1]                               | 0.46154 |
| [CHAP Ami_2 Ami_3][CHAP SH3 Ami_3]                                 | 0.54194 |
| [Ami_2 Ami_5][ZoocinA_TRD SH3]                                     | 0.42857 |
| [CW_1 CHAP Ami_5][Ami_2 CHAP SH3]{0,1}[CW_1 GH25 ZoocinA_TRD]{0,1} | 0.54248 |
| [PET_M15 GH108 GH19][GH24]{0,1}[PG_3]{0,1}                         | 0.34286 |
| [GH108 MUR NUDIX][GH24]{0,1}[PG_3]{0,1}                            | 0.56250 |
| [GH108 MUR PROKAR_LIPOPROTEIN][GH108]{0,1}[PG_3]{0,1}              | 0.55102 |
| [PG_1 GH108][MUR PG_3]                                             | 0.50000 |
| [GH108 PG_1][GH24 PG_3]                                            | 0.40000 |
| [SLT_related GH108 MUR][PG_3]{0,1}[AA_TRNA_LIGASE_II_GLYAB]{0,1}   | 0.50909 |
| [GH108 Pesticin_C NLPC_P60][GH108]{0,1}[PG_3]{0,1}                 | 0.42857 |

| Support | Name                     |
|---------|--------------------------|
| 392     | <b>Gordonia</b>          |
| 1250    | <b>Mycolicibacterium</b> |
| 65      | <b>Rhodococcus</b>       |
| 75      | <b>Microbacterium</b>    |
| 234     | <b>Arthrobacter</b>      |
| 127     | <b>Cutibacterium</b>     |
| 176     | <b>Streptomyces</b>      |
| 142     | <b>Synechococcus</b>     |
| 276     | <b>Bacillus</b>          |
| 50      | <b>Listeria</b>          |
| 58      | <b>Paenibacillus</b>     |
| 229     | <b>Staphylococcus</b>    |
| 85      | <b>Enterococcus</b>      |
|         | <b>Lactococcus</b>       |
| 648     | <b>Streptococcus</b>     |
| 67      | <b>Aeromonas</b>         |
|         | <b>Esccherichia</b>      |
| 1169    | <b>Klebsiella</b>        |
|         | <b>Salmonella</b>        |
|         | <b>Shigella</b>          |
| 73      | <b>Erwinia</b>           |
| 84      | <b>Pectobacterium</b>    |
| 95      | <b>Acinetobacter</b>     |
| 299     | <b>Pseudomonas</b>       |
| 269     | <b>Vibrio</b>            |

| Genus                                                              |         |
|--------------------------------------------------------------------|---------|
| Rule                                                               | F-score |
| [PET_M23 DUF1906 LGFP][Ami_2 RECA_3]{0,1}[PET_M23 LGFP]{0,1}       | 0.64020 |
| [PET_M15 GH19 PET_C39][GH19 Ami_2]{0,1}[PG_1 SLT_related]{0,1}     | 0.62687 |
| [LGFP PET_M23 PET_M15][LGFP LysM]{0,1}[GH25 PG_1]{0,1}             | 0.46612 |
| [CW_7 PET_M15][LysM Ami_2 PG_1]                                    | 0.50000 |
| [CHAP GH25 Ami_2][LysM Ami_2 CW_7]                                 | 0.53125 |
| [Ami_2]                                                            | 0.12834 |
| [Ami_2 SLT_related CHAP][SLT_related LysM PG_1]                    | 0.57576 |
| [YkuD PET_C70 PET_C39][YkuD GH24]{0,1}[GLUCO GH19]{0,1}            | 0.56962 |
| [GH25 Ami_2 Ami_3][LysM SH3 Ami02_C]{0,1}[PG_1 DUF3597 SPOR]{0,1}  | 0.53066 |
| [Ami_2 PET_M15 Ami_3][PSA_CBD]                                     | 0.54545 |
| [Ami_2][Cu_amine_oxidN1]                                           | 0.40000 |
| [CHAP Ami_2 Ami_3][CHAP SH3 Ami_3]                                 | 0.54194 |
| [Ami_2 Ami_5][ZoocinA_TRD SH3]                                     | 0.42857 |
| [Ami_2 CHAP][SH3]                                                  | 0.35821 |
| [CW_1 CHAP Ami_5][Ami_2 CHAP SH3]{0,1}[CW_1 GH25 ZoocinA_TRD]{0,1} | 0.55333 |
| [PET_M15 GH108 GH19][GH24]{0,1}[PG_3]{0,1}                         | 0.34286 |
| [GH108 MUR NUDIX][GH24]{0,1}[PG_3]{0,1}                            | 0.46667 |
| [GH19 GH108 MUR][GH24]{0,1}[PG_3]{0,1}                             | 0.42424 |
| [PG_1 GH108][MUR PG_3]                                             | 0.44444 |
| [GH108 PG_1][PG_3 MUR]                                             | 0.57143 |
| [GH108 MUR PROKAR_LIPOPROTEIN][GH108]{0,1}[PG_3]{0,1}              | 0.48837 |
| [PG_1 GH108][MUR PG_3]                                             | 0.50000 |
| [GH108 PG_1][GH24 PG_3]                                            | 0.40000 |
| [SLT_related GH108 MUR][PG_3]{0,1}[AA_TRNA_LIGASE_II_GLYAB]{0,1}   | 0.50909 |
| [GH108 Pesticin_C NLPC_P60][GH108]{0,1}[PG_3]{0,1}                 | 0.42857 |

| Support | Name                               |
|---------|------------------------------------|
| 391     | <i>Gordonia terrae</i>             |
| 1212    | <i>Mycolicibacterium smegmatis</i> |
| 62      | <i>Rhodococcus erythropolis</i>    |
| 71      | <i>Microbacterium foliorum</i>     |
| 230     | <i>Arthrobacter globiformis</i>    |
| 113     | <i>Arthrobacter sp. ATCC 21022</i> |
| 176     | <i>Cutibacterium acnes</i>         |
|         | <i>Streptomyces griseus</i>        |
| 142     | <i>Synechococcus sp.</i>           |
|         | <i>Synechococcus sp. WH 7803</i>   |
| 268     | <i>Bacillus cereus</i>             |
|         | <i>Bacillus subtilis</i>           |
|         | <i>Bacillus thuringiensis</i>      |
| 47      | <i>Listeria monocytogenes</i>      |
| 49      | <i>Paenibacillus larvae</i>        |
| 229     | <i>Staphylococcus aureus</i>       |
| 85      | <i>Enterococcus faecalis</i>       |
| 262     | <i>Lactococcus lactis</i>          |
|         | <i>Streptococcus agalactiae</i>    |
|         | <i>Streptococcus dysgalactiae</i>  |
| 386     | <i>Streptococcus pneumoniae</i>    |
|         | <i>Streptococcus pyogenes</i>      |
|         | <i>Streptococcus suis</i>          |
| 67      | <i>Aeromonas salmonicida</i>       |
| 566     | <i>Escherichia coli</i>            |
| 174     | <i>Klebsiella pneumoniae</i>       |
| 289     | <i>Salmonella enterica</i>         |
| 65      | <i>Shigella flexneri</i>           |
| 60      | <i>Erwinia amylovora</i>           |
| 57      | <i>Pectobacterium atrosepticum</i> |
| 94      | <i>Acinetobacter baumannii</i>     |
| 299     | <i>Pseudomonas aeruginosa</i>      |
|         | <i>Vibrio breoganii</i>            |
| 266     | <i>Vibrio cholerae</i>             |
|         | <i>Vibrio cyclitrophicus</i>       |
|         | <i>Vibrio lentus</i>               |

## Species

| Rule                                                           | F-score |
|----------------------------------------------------------------|---------|
| [PET_M23 LGFP DUF1906][Ami_2 PET_M23]{0,1}[LGFP RECA_3]{0,1}   | 0.61856 |
| [PET_M15 GH19 PET_C39][GH19 Ami_2]{0,1}[PG_1 SLT_related]{0,1} | 0.62687 |
| [PET_M23 Ami_2 PET_M15][GH25 LGFP DUF4185]                     | 0.47312 |
| [CW_7 PET_M15][LysM Ami_2 PG_1]                                | 0.50000 |
| [CHAP GH25][LysM]                                              | 0.54545 |
| [Ami_2 CHAP][Ami_2 CW_7 GH25]                                  | 0.43243 |
| [Ami_2]                                                        | 0.12834 |
| [Ami_2][Ami_2 LysM][PG_1 SLT_related]                          | 0.44444 |
| [GH24 PROKAR_LIPOPROTEIN PET_C39][GH24 SLT_related PET_M15]    | 0.46154 |
| [GH24 PET_C39 NLPC_P60][GH19]{0,1}[PET_M15]{0,1}               | 0.54545 |
| [GH25 Ami_3 Ami_2][Ami02_C SH3]                                | 0.56250 |
| [GH25 Ami_2 GH24][LysM DUF3597]                                | 0.44444 |
| [GH25 Ami_2 Ami_3][Ami02_C SH3 SPOR]                           | 0.53846 |
| [Ami_2 PET_M15 Ami_3][PSA_CBD]                                 | 0.66667 |
| [Ami_3]                                                        | 0.25532 |
| [CHAP Ami_2 Ami_3][SH3 Ami_3 GLUCO]                            | 0.61314 |
| [Ami_2 Ami_5][ZoocinA_TRD SH3]                                 | 0.42857 |
| [Ami_2 CHAP][SH3]                                              | 0.39344 |
| [GLUCO Ami_3][CHAP Ami_3 LysM][CHAP LysM SH3]                  | 0.75000 |
| [GLUCO Ami_3 Ami_5][CHAP LysM CW_7][GLUCO CHAP SH3]            | 0.60000 |
| [Ami_2 GH25 Ami_5][CW_1]                                       | 0.66667 |
| [CHAP Ami_5][SH3 CW_7 GH25]                                    | 0.56790 |
| [Ami_3 Ami_5][LysM CW_7][CHAP GLUCO]                           | 0.57143 |
| [SLT_related PET_M15 GH19]                                     | 0.31579 |
| [GH108 MUR NUDIX][GH24]{0,1}[PG_3]{0,1}                        | 0.46667 |
| [GH19 GH108 MUR][SLT_related]{0,1}[PG_3]{0,1}                  | 0.42424 |
| [GH108 PG_1][PG_3 MUR]                                         | 0.44444 |
| [GH24]                                                         | 0.24000 |
| [GH108 PROKAR_LIPOPROTEIN MUR][GH108]{0,1}[PG_3]{0,1}          | 0.48837 |
| [PET_M15 GH24]                                                 | 0.30000 |
| [GH108 PG_1][GH24 PG_3]                                        | 0.40000 |
| [PROKAR_LIPOPROTEIN GH108 PG_1][SLT_related MUR PG_3]          | 0.50000 |
| [PET_M15]                                                      | 0.26667 |
| [GH108][PG_3]                                                  | 0.33333 |
| [GH108][PG_3]                                                  | 0.50000 |
| [GH108 PET_M15 SLT_related][GH108]{0,1}[PG_3]{0,1}             | 0.31579 |



## Support

359

1208

50

57

30

189

113

76

---

53

67

---

82

25

99

41

47

162

72

255

27

26

94

58

27

---

37

551

160

264

38

52

34

78

220

30

47

34

---

29
