# Supplementary material for: PhaLP: A Database for the Study of Phage Lytic Proteins and Their Evolution
Source: MDPI journal article supplement (doi:10.3390/v13071240), 2021-06-26
Supplement: s1 [file s1]

| <b>Accession</b>           | <b>Index</b> | <b>Architecture</b>               |
|----------------------------|--------------|-----------------------------------|
| <a href="#">G8IDH4</a>     | 2729         | ['Ami_2']                         |
| <a href="#">A0A346N934</a> | 2730         | ['Ami_2']                         |
| <a href="#">A0A411CJS4</a> | 2731         | ['Ami_2']                         |
| <a href="#">A0A0A0YSC3</a> | 2732         | ['Ami_2']                         |
| <a href="#">A0A411CMX7</a> | 2733         | ['Ami_2']                         |
| <a href="#">A0A411CCV4</a> | 2734         | ['Ami_2']                         |
| <a href="#">A0A411CH49</a> | 2735         | ['Ami_2']                         |
| <a href="#">A0A411CFG6</a> | 2736         | ['Ami_2']                         |
| <a href="#">A0A411AZJ8</a> | 2737         | ['Ami_2']                         |
| <a href="#">A0A3G8FNF9</a> | 2738         | ['Ami_2']                         |
| <a href="#">A0A3G3BZH6</a> | 2739         | ['Ami_2']                         |
| <a href="#">A0A346FDZ5</a> | 2740         | ['Ami_2']                         |
| <a href="#">A0A411C1Y0</a> | 2741         | ['Ami_2']                         |
| <a href="#">A0A2D1GIG5</a> | 2742         | ['Ami_2']                         |
| <a href="#">A0A411CC32</a> | 2743         | ['Ami_2']                         |
| <a href="#">A0A1D8EYF9</a> | 2744         | ['Ami_2']                         |
| <a href="#">A0A0K1Y763</a> | 2745         | ['Ami_2']                         |
| <a href="#">G1BLA0</a>     | 2746         | ['Ami_2']                         |
| <a href="#">V5UQ97</a>     | 2747         | ['Ami_2']                         |
| <a href="#">G1BPF4</a>     | 2748         | ['Ami_2']                         |
| <a href="#">A0A481VQV4</a> | 2749         | ['Ami_2']                         |
| <a href="#">T2A8A7</a>     | 2750         | ['Ami_2']                         |
| <a href="#">A0A345KWK5</a> | 2751         | ['Ami_2']                         |
| <a href="#">B3VLX1</a>     | 2752         | ['Ami_2']                         |
| <a href="#">G8I9G3</a>     | 2753         | ['Ami_2']                         |
| <a href="#">A0A0F6WEB5</a> | 2754         | ['Ami_2']                         |
| <a href="#">Q1A072</a>     | 2755         | ['Ami_2']                         |
| <a href="#">T2A7Y9</a>     | 2756         | ['Ami_2']                         |
| <a href="#">A0A514DFT8</a> | 2757         | ['Ami_2', 'LGFP']                 |
| <a href="#">A0A142KA09</a> | 2758         | ['Ami_2', 'LGFP']                 |
| <a href="#">A0A3G8FFL9</a> | 2759         | ['Ami_2', 'LGFP']                 |
| <a href="#">A0A3G8FEN5</a> | 2760         | ['Ami_2', 'LGFP']                 |
| <a href="#">A0A345KRY4</a> | 2761         | ['Ami_2', 'LGFP']                 |
| <a href="#">A0A142K8I6</a> | 2762         | ['Ami_2', 'LGFP']                 |
| <a href="#">A0A4Y6EHX7</a> | 2763         | ['Ami_2', 'LGFP']                 |
| <a href="#">A0A2Z4Q3T0</a> | 2764         | ['Ami_2', 'LGFP']                 |
| <a href="#">A0A3S9URD9</a> | 2765         | ['Ami_2', 'LGFP']                 |
| <a href="#">A0A3S9UR36</a> | 2766         | ['Ami_2', 'LGFP']                 |
| <a href="#">A0A4Y5NZK9</a> | 2767         | ['Ami_2', 'LGFP']                 |
| <a href="#">A0A2U8UKC2</a> | 2768         | ['Ami_2', 'LGFP']                 |
| <a href="#">A0A4D6T682</a> | 2769         | ['Ami_2', 'LGFP']                 |
| <a href="#">A0A162E1U7</a> | 2770         | ['Ami_2', 'LGFP', 'LGFP', 'LGFP'] |
| <a href="#">A0A346FD11</a> | 2771         | ['Ami_2', 'LGFP', 'LGFP', 'LGFP'] |
| <a href="#">A0A4D6E276</a> | 2772         | ['Ami_2', 'LGFP', 'LGFP']         |
| <a href="#">A0A514U119</a> | 2773         | ['Ami_2', 'LGFP', 'LGFP']         |

|                            |                                        |
|----------------------------|----------------------------------------|
| <a href="#">A0A515MH83</a> | 2774 ['Ami_2', 'LGFP', 'LGFP', 'LGFP'] |
| <a href="#">Q856D3</a>     | 2775 ['Ami_2', 'LGFP', 'LGFP']         |
| <a href="#">A0A3S9UQK1</a> | 2776 ['Ami_2', 'LGFP', 'LGFP']         |
| <a href="#">A0A2P1A0T5</a> | 2777 ['Ami_2', 'LGFP', 'LGFP', 'LGFP'] |
| <a href="#">A0A516KPP4</a> | 2778 ['Ami_2', 'LGFP', 'LGFP', 'LGFP'] |
| <a href="#">A0A159B6C4</a> | 2779 ['Ami_2', 'LGFP', 'LGFP', 'LGFP'] |
| <a href="#">A0A1B3AZZ3</a> | 2780 ['Ami_2', 'LGFP', 'LGFP', 'LGFP'] |
| <a href="#">A0A3Q9R8M1</a> | 2781 ['Ami_2', 'LGFP', 'LGFP', 'LGFP'] |
| <a href="#">A0A411CUP2</a> | 2782 ['Ami_2', 'LGFP', 'LGFP', 'LGFP'] |
| <a href="#">A0A3S9UAG8</a> | 2783 ['Ami_2', 'LGFP', 'LGFP', 'LGFP'] |
| <a href="#">A0A2K9VH40</a> | 2784 ['Ami_2', 'LGFP', 'LGFP', 'LGFP'] |
| <a href="#">A0A4Y6EGW4</a> | 2785 ['Ami_2', 'LGFP', 'LGFP', 'LGFP'] |
| <a href="#">A0A2U8UNQ7</a> | 2786 ['Ami_2', 'LGFP', 'LGFP', 'LGFP'] |
| <a href="#">A0A514DIC5</a> | 2787 ['Ami_2', 'LGFP', 'LGFP', 'LGFP'] |
| <a href="#">A0A2U8UKP6</a> | 2788 ['Ami_2', 'LGFP', 'LGFP']         |
| <a href="#">A0A4Y6EFS0</a> | 2789 ['Ami_2', 'LGFP', 'LGFP']         |
| <a href="#">A0A2Z4Q8W9</a> | 2790 ['Ami_2', 'LGFP', 'LGFP', 'LGFP'] |
| <a href="#">A0A1B3B1F8</a> | 2791 ['Ami_2', 'LGFP']                 |
| <a href="#">A0A2Z4Q823</a> | 2792 ['Ami_2', 'LGFP']                 |
| <a href="#">A0A2H4PEH7</a> | 2793 ['Ami_2']                         |
| <a href="#">A0A0K2FNX7</a> | 2794 ['Ami_2']                         |
| <a href="#">Q856M5</a>     | 2795 ['Ami_2']                         |
| <a href="#">A0A3G3LYI7</a> | 2796 ['Ami_2']                         |
| <a href="#">S5Y3I1</a>     | 2797 ['Ami_2']                         |
| <a href="#">A0A2P1N4E4</a> | 2798 ['Ami_2']                         |
| <a href="#">G8I449</a>     | 2799 ['Ami_2']                         |
| <a href="#">A0A345MF39</a> | 2800 ['Ami_2']                         |
| <a href="#">A0A2Z5H6D8</a> | 2801 ['Ami_2']                         |
| <a href="#">A0A385DWR7</a> | 2802 ['Ami_2']                         |
| <a href="#">R4JPZ6</a>     | 2803 ['Ami_2']                         |
| <a href="#">A0A2S1PB03</a> | 2804 ['Ami_2']                         |
| <a href="#">A0A2P1JY73</a> | 2805 ['PET_M23', 'Ami_2']              |
| <a href="#">A0A514CXM0</a> | 2806 ['PET_M23', 'Ami_2']              |
| <a href="#">A0A410TCC5</a> | 2807 ['PET_M23', 'Ami_2']              |
| <a href="#">A0A410TBB4</a> | 2808 ['PET_M23', 'Ami_2']              |
| <a href="#">A8WA19</a>     | 2809 ['PET_M23', 'Ami_2', 'PG_1']      |
| <a href="#">A0A385UEY8</a> | 2810 ['PET_M23', 'Ami_2', 'PG_1']      |
| <a href="#">A0A385D1U0</a> | 2811 ['PET_M23', 'Ami_2', 'PG_1']      |
| <a href="#">A0A0H4THJ6</a> | 2812 ['PET_M23', 'Ami_2', 'PG_1']      |
| <a href="#">A0A2D1GEV9</a> | 2813 ['PET_M23', 'Ami_2', 'PG_1']      |
| <a href="#">A0A386KGY7</a> | 2814 ['PET_M23', 'Ami_2', 'PG_1']      |
| <a href="#">A0A482JAE8</a> | 2815 ['PET_M23', 'Ami_2', 'PG_1']      |
| <a href="#">W8ED04</a>     | 2816 ['PET_M23', 'Ami_2', 'PG_1']      |
| <a href="#">A0A1D8EVX2</a> | 2817 ['PET_M23', 'Ami_2', 'PG_1']      |
| <a href="#">Q19Y11</a>     | 2818 ['GH19', 'Ami_2']                 |
| <a href="#">A0A0B5A4W2</a> | 2819 ['GH19', 'Ami_2']                 |

|                            |                                                |
|----------------------------|------------------------------------------------|
| <a href="#">A0A2I2MPE9</a> | 2820 ['GH19', 'Ami_2']                         |
| <a href="#">G8I4EQ</a>     | 2821 ['GH19', 'Ami_2']                         |
| <a href="#">Q855S8</a>     | 2822 ['GH19', 'Ami_2']                         |
| <a href="#">I3WWS1</a>     | 2823 ['GH19', 'Ami_2']                         |
| <a href="#">A0A385DN04</a> | 2824 ['Ami_2']                                 |
| <a href="#">A0A2P1JR63</a> | 2825 ['Ami_2']                                 |
| <a href="#">A0A0K2FMY5</a> | 2826 ['Ami_2']                                 |
| <a href="#">A0A0K2FNU8</a> | 2827 ['Ami_2']                                 |
| <a href="#">A0A2D1GA73</a> | 2828 ['Ami_2']                                 |
| <a href="#">A0A2S1PCZ0</a> | 2829 ['Ami_2']                                 |
| <a href="#">A0A385UK50</a> | 2830 ['Ami_2']                                 |
| <a href="#">A0A385UKB6</a> | 2831 ['Ami_2']                                 |
| <a href="#">A0A192YBS4</a> | 2832 ['Ami_2']                                 |
| <a href="#">A0A411AYD0</a> | 2833 ['Ami_2']                                 |
| <a href="#">A0A3G8FHF6</a> | 2834 ['Ami_2']                                 |
| <a href="#">A0A023ZWD2</a> | 2835 ['Ami_2']                                 |
| <a href="#">A0A249XT90</a> | 2836 ['Ami_2']                                 |
| <a href="#">A0A0A0RKX1</a> | 2837 ['Ami_2']                                 |
| <a href="#">B5U576</a>     | 2838 ['Ami_2']                                 |
| <a href="#">A0A2U8UMJ2</a> | 2839 ['Ami_2']                                 |
| <a href="#">A0A0U4IDK0</a> | 2840 ['Ami_2', 'LysM', 'LysM']                 |
| <a href="#">A0A3G2KF58</a> | 2841 ['Ami_2']                                 |
| <a href="#">A0A3G2KFA3</a> | 2842 ['Ami_2']                                 |
| <a href="#">A0A3G2KET2</a> | 2843 ['Ami_2']                                 |
| <a href="#">A0A3G2KIR8</a> | 2844 ['Ami_2']                                 |
| <a href="#">A0A3G2KCX9</a> | 2845 ['Ami_2']                                 |
| <a href="#">A0A3G2KH20</a> | 2846 ['Ami_2']                                 |
| <a href="#">A0A0K0N6L3</a> | 2847 ['Ami_2', 'LGFP', 'LGFP']                 |
| <a href="#">A0A2D1A400</a> | 2848 ['Ami_2', 'LGFP', 'LGFP', 'LGFP', 'LGFP'] |
| <a href="#">A0A2P1CC23</a> | 2849 ['Ami_2']                                 |
| <a href="#">A0A2Z4Q5C9</a> | 2850 ['Ami_2']                                 |
| <a href="#">A0A4D6E3J8</a> | 2851 ['Ami_2']                                 |
| <a href="#">A0A2H4J9K9</a> | 2852 ['Ami_2']                                 |
| <a href="#">D4P7C1</a>     | 2853 ['Ami_2']                                 |
| <a href="#">D4P7N0</a>     | 2854 ['Ami_2']                                 |
| <a href="#">A0A455LM17</a> | 2855 ['Ami_2']                                 |
| <a href="#">A0A346FC93</a> | 2856 ['Ami_2']                                 |
| <a href="#">A0A386KB78</a> | 2857 ['Ami_2']                                 |
| <a href="#">A0A3G3M0R1</a> | 2858 ['Ami_2']                                 |
| <a href="#">A0A0M5M0S0</a> | 2859 ['Ami_2']                                 |
| <a href="#">A0A3G2KDX8</a> | 2860 ['Ami_2']                                 |
| <a href="#">Q9ZX49</a>     | 2861 ['Ami_2']                                 |
| <a href="#">R4JD41</a>     | 2862 ['Ami_2']                                 |
| <a href="#">A0A0E3X9U3</a> | 2863 ['Ami_2']                                 |
| <a href="#">A0A0E3T6F9</a> | 2864 ['Ami_2']                                 |
| <a href="#">A0A0K0NKI0</a> | 2865 ['Ami_2']                                 |

|                            |                          |
|----------------------------|--------------------------|
| <a href="#">A0A1B3B0M4</a> | 2866 ['Ami_2']           |
| <a href="#">A0A166Y6M9</a> | 2867 ['Ami_2']           |
| <a href="#">A0A142KCB0</a> | 2868 ['Ami_2']           |
| <a href="#">A0A482JCA2</a> | 2869 ['Ami_2']           |
| <a href="#">G8FS21</a>     | 2870 ['Ami_2']           |
| <a href="#">A0A0K0N5F1</a> | 2871 Unknown             |
| <a href="#">A0A0K0N5D8</a> | 2872 Unknown             |
| <a href="#">A0A166Y5E2</a> | 2873 ['Ami_2']           |
| <a href="#">A0A411B2T5</a> | 2874 ['Ami_2']           |
| <a href="#">A0A514A5Z4</a> | 2875 ['Ami_2']           |
| <a href="#">A0A411B1T4</a> | 2876 ['Ami_2']           |
| <a href="#">A0A2P1N5E0</a> | 2877 ['Ami_2']           |
| <a href="#">A0A482JIE1</a> | 2878 ['Ami_2']           |
| <a href="#">A0A2K9VED9</a> | 2879 ['Ami_2']           |
| <a href="#">A0A4Y6EHN5</a> | 2880 ['Ami_2']           |
| <a href="#">A0A2K9VDJ1</a> | 2881 ['Ami_2']           |
| <a href="#">A0A411BQU5</a> | 2882 ['Ami_2']           |
| <a href="#">A0A515MJL0</a> | 2883 ['Ami_2']           |
| <a href="#">A0A166Y601</a> | 2884 ['Ami_2']           |
| <a href="#">A0A4Y6EQL6</a> | 2885 ['Ami_2']           |
| <a href="#">A0A385IKI2</a> | 2886 ['GH19']            |
| <a href="#">A0A0U3E1L6</a> | 2887 ['GH19']            |
| <a href="#">A0A514CTD2</a> | 2888 Unknown             |
| <a href="#">R9ZZL3</a>     | 2889 ['PG_1', 'GH19']    |
| <a href="#">A0A385A117</a> | 2890 ['GH19', 'PG_1']    |
| <a href="#">A0A067XQI3</a> | 2891 Unknown             |
| <a href="#">A0A0K1LLX7</a> | 2892 Unknown             |
| <a href="#">A0A1P8VVH0</a> | 2893 ['GH19']            |
| <a href="#">A0A2R3UA80</a> | 2894 ['GH19']            |
| <a href="#">A0A023NGE0</a> | 2895 ['GH19']            |
| <a href="#">A0A2U7NMW4</a> | 2896 ['GH19']            |
| <a href="#">A0A2D2W2B5</a> | 2897 ['GH19']            |
| <a href="#">A0A076G6J8</a> | 2898 ['GH19', 'PG_1']    |
| <a href="#">A0A291AUV5</a> | 2899 ['GH19', 'PG_1']    |
| <a href="#">G9I9L2</a>     | 2900 ['GH19']            |
| <a href="#">A0A4Y5TM42</a> | 2901 ['GH19']            |
| <a href="#">A0A482IHJ0</a> | 2902 ['PET_C39', 'GH19'] |
| <a href="#">A0A482IAM1</a> | 2903 ['GH19']            |
| <a href="#">A0A510E8H5</a> | 2904 ['GH19']            |
| <a href="#">M4T440</a>     | 2905 Unknown             |
| <a href="#">G8EYC4</a>     | 2906 ['GH19']            |
| <a href="#">Q8W6X9</a>     | 2907 ['GH19']            |
| <a href="#">A0A3G1GLF3</a> | 2908 ['GH19']            |
| <a href="#">A0A3S7I6E5</a> | 2909 ['GH19']            |
| <a href="#">A0A3S7HFC5</a> | 2910 ['GH19']            |
| <a href="#">Q2NPA7</a>     | 2911 ['GH19']            |

|                            |                       |
|----------------------------|-----------------------|
| <a href="#">A0A3S7HPK5</a> | 2912 ['GH19']         |
| <a href="#">A0A3S7I6N4</a> | 2913 ['GH19']         |
| <a href="#">A0A4Y5TZN0</a> | 2914 ['GH19']         |
| <a href="#">A0A514A7K5</a> | 2915 ['GH19']         |
| <a href="#">G3BM11</a>     | 2916 ['GH19']         |
| <a href="#">G3BM12</a>     | 2917 ['GH19']         |
| <a href="#">A0A3G8F0Y3</a> | 2918 ['GH19']         |
| <a href="#">A0A2H4YGM8</a> | 2919 ['GH19']         |
| <a href="#">K4F6U2</a>     | 2920 ['GH19']         |
| <a href="#">V5KSW7</a>     | 2921 ['GH19']         |
| <a href="#">A0A2I6PHU8</a> | 2922 ['GH19']         |
| <a href="#">A0A481W7S9</a> | 2923 ['GH19']         |
| <a href="#">B5TK83</a>     | 2924 ['GH19']         |
| <a href="#">A0A2H4JHX4</a> | 2925 ['GH19']         |
| <a href="#">A0A059VA40</a> | 2926 ['GH19']         |
| <a href="#">A0A345BNC6</a> | 2927 ['GH19']         |
| <a href="#">A0A7I3</a>     | 2928 ['GH19']         |
| <a href="#">A0A075BS11</a> | 2929 ['GH19']         |
| <a href="#">A0A219VHE4</a> | 2930 ['GH19', 'PG_1'] |
| <a href="#">A0A346FDB4</a> | 2931 ['GH19']         |
| <a href="#">A0A2H4JAK8</a> | 2932 ['GH19']         |
| <a href="#">A0A2H4JDB4</a> | 2933 ['GH19']         |
| <a href="#">A0A2H4J3F6</a> | 2934 ['GH19']         |
| <a href="#">Q5ZGC9</a>     | 2935 ['GH19']         |
| <a href="#">A0A0B5A729</a> | 2936 ['GH19']         |
| <a href="#">A0A193GYJ3</a> | 2937 ['GH19']         |
| <a href="#">A0A0F6R8M1</a> | 2938 ['GH19']         |
| <a href="#">G9L6E8</a>     | 2939 ['GH19']         |
| <a href="#">A0A2I6TCF1</a> | 2940 ['GH19']         |
| <a href="#">Q858F0</a>     | 2941 ['GH19']         |
| <a href="#">M1F227</a>     | 2942 ['GH19']         |
| <a href="#">F1C591</a>     | 2943 ['GH19']         |
| <a href="#">K7PJS7</a>     | 2944 ['GH19']         |
| <a href="#">A0A482J1N9</a> | 2945 ['GH19']         |
| <a href="#">A0A2Z2FAL4</a> | 2946 ['GH19']         |
| <a href="#">A0A482MFC8</a> | 2947 ['GH19']         |
| <a href="#">A0A482MF60</a> | 2948 ['GH19']         |
| <a href="#">A0A482IL61</a> | 2949 ['GH19']         |
| <a href="#">A0A2Z2FBK1</a> | 2950 ['GH19']         |
| <a href="#">G8C7W0</a>     | 2951 ['GH19']         |
| <a href="#">A0A2Z5H035</a> | 2952 ['GH19']         |
| <a href="#">Q8HA86</a>     | 2953 ['GH19']         |
| <a href="#">A0A192Y6G4</a> | 2954 ['GH19']         |
| <a href="#">A0A514A8T2</a> | 2955 ['GH19']         |
| <a href="#">A0A482MUT9</a> | 2956 ['GH19']         |
| <a href="#">I7ATQ5</a>     | 2957 ['GH19']         |

|                            |               |
|----------------------------|---------------|
| <a href="#">A0A494RAL2</a> | 2958 ['GH19'] |
| <a href="#">A0A386KJF2</a> | 2959 ['GH19'] |
| <a href="#">A0A482MV99</a> | 2960 ['GH19'] |
| <a href="#">A0A2H4P6U7</a> | 2961 ['GH19'] |
| <a href="#">A0A482MGV2</a> | 2962 ['GH19'] |
| <a href="#">A1YZZ8</a>     | 2963 Unknown  |
| <a href="#">A0A2S1GSQ6</a> | 2964 ['GH19'] |
| <a href="#">A0A3S7L8K0</a> | 2965 ['GH19'] |
| <a href="#">A0A481UM06</a> | 2966 ['GH19'] |
| <a href="#">A0A1B0Z086</a> | 2967 ['GH19'] |
| <a href="#">A0A0U4JP23</a> | 2968 ['GH19'] |
| <a href="#">A0A3S6RNH2</a> | 2969 ['GH19'] |
| <a href="#">A0A481URM7</a> | 2970 ['GH19'] |
| <a href="#">A0A1W6JTC9</a> | 2971 ['GH19'] |
| <a href="#">A0A481UMS2</a> | 2972 ['GH19'] |
| <a href="#">A0A481UPC1</a> | 2973 ['GH19'] |
| <a href="#">X5IEK4</a>     | 2974 ['GH19'] |
| <a href="#">A0A0S3UG46</a> | 2975 ['GH19'] |
| <a href="#">A0A2H4J3Y3</a> | 2976 ['GH19'] |
| <a href="#">A0A2H4J3N1</a> | 2977 ['GH19'] |
| <a href="#">A0A345MV58</a> | 2978 ['GH19'] |
| <a href="#">A0A125RNP1</a> | 2979 ['GH19'] |
| <a href="#">J7I4M6</a>     | 2980 ['GH19'] |
| <a href="#">A0A481UYN2</a> | 2981 ['GH19'] |
| <a href="#">A0A0M3LPP0</a> | 2982 ['GH19'] |
| <a href="#">Q7Y5V0</a>     | 2983 ['GH19'] |
| <a href="#">D0UIK2</a>     | 2984 ['GH19'] |
| <a href="#">A0A292GC73</a> | 2985 ['GH19'] |
| <a href="#">C9DFY3</a>     | 2986 ['GH19'] |
| <a href="#">A0A2H4N7Z7</a> | 2987 ['GH19'] |
| <a href="#">F1C5D2</a>     | 2988 ['GH19'] |
| <a href="#">A0A248XCW5</a> | 2989 ['GH19'] |
| <a href="#">A0A411EZQ3</a> | 2990 ['GH19'] |
| <a href="#">A0A2D1GNI0</a> | 2991 ['GH19'] |
| <a href="#">A0A411CU33</a> | 2992 ['GH19'] |
| <a href="#">A0A410TDJ6</a> | 2993 ['GH19'] |
| <a href="#">A0A385DS23</a> | 2994 ['GH19'] |
| <a href="#">A0A410TBH8</a> | 2995 ['GH19'] |
| <a href="#">A0A385DU67</a> | 2996 ['GH19'] |
| <a href="#">A0A2D2W4L6</a> | 2997 ['GH19'] |
| <a href="#">A0A4Y6EKA7</a> | 2998 ['GH19'] |
| <a href="#">A0A0K0N6C3</a> | 2999 ['GH19'] |
| <a href="#">A0A386KG61</a> | 3000 ['GH19'] |
| <a href="#">A0A345L4X6</a> | 3001 ['GH19'] |
| <a href="#">A0A386KFT4</a> | 3002 ['GH19'] |
| <a href="#">A0A2L1IZV9</a> | 3003 ['GH19'] |

|                            |                                     |
|----------------------------|-------------------------------------|
| <a href="#">A0A410TE38</a> | 3004 ['GH19']                       |
| <a href="#">A0A386KD63</a> | 3005 ['GH19']                       |
| <a href="#">Q2TLS9</a>     | 3006 ['GH19']                       |
| <a href="#">G8EJQ6</a>     | 3007 ['GH19']                       |
| <a href="#">G8EJZ6</a>     | 3008 ['GH19']                       |
| <a href="#">A0A2L1IX84</a> | 3009 ['GH19']                       |
| <a href="#">A0A1J0MDM1</a> | 3010 ['PG_1', 'GH19']               |
| <a href="#">A0A2Z5X8L4</a> | 3011 ['PG_1', 'GH19']               |
| <a href="#">A0A2P1JRH1</a> | 3012 ['PG_1', 'GH19']               |
| <a href="#">A0A482JFJ5</a> | 3013 ['PG_1', 'GH19']               |
| <a href="#">A0A3G3LWH1</a> | 3014 ['GH19', 'PET_C39']            |
| <a href="#">A0A4Y6EME5</a> | 3015 ['GH19', 'PET_C39']            |
| <a href="#">A0A2H4P8Q9</a> | 3016 ['GH19', 'PET_C39']            |
| <a href="#">A0A2H4P8D8</a> | 3017 ['GH19', 'PET_C39']            |
| <a href="#">A0A3G3MA99</a> | 3018 ['GH19', 'PET_C39']            |
| <a href="#">A0A2H4P918</a> | 3019 ['GH19', 'PET_C39']            |
| <a href="#">A7IYC3</a>     | 3020 ['GH19', 'PET_C39']            |
| <a href="#">A0A514DKF1</a> | 3021 ['GH19', 'PET_C39']            |
| <a href="#">A0A4Y6ENE9</a> | 3022 ['GH19', 'PET_C39']            |
| <a href="#">A0A2H4PIY8</a> | 3023 ['PET_M23']                    |
| <a href="#">A0A2H4PIV9</a> | 3024 ['PET_M23']                    |
| <a href="#">A0A142K909</a> | 3025 ['GH19']                       |
| <a href="#">A0A160DEU2</a> | 3026 ['GH19']                       |
| <a href="#">A0A345L3D0</a> | 3027 ['GH19']                       |
| <a href="#">A0A1C9EHQ1</a> | 3028 ['PROKAR_LIPOPROTEIN', 'GH19'] |
| <a href="#">A0A515MKD7</a> | 3029 ['GH19']                       |
| <a href="#">A0A142KC32</a> | 3030 ['GH19']                       |
| <a href="#">A0A345KW49</a> | 3031 ['GH19']                       |
| <a href="#">A0A410TCT3</a> | 3032 ['GH19']                       |
| <a href="#">A0A411AWR9</a> | 3033 ['GH19']                       |
| <a href="#">A0A345L130</a> | 3034 ['GH19']                       |
| <a href="#">A0A385E1X5</a> | 3035 ['GH19']                       |
| <a href="#">A0A142F2G1</a> | 3036 ['GH19']                       |
| <a href="#">A0A4Y6ETU2</a> | 3037 Unknown                        |
| <a href="#">A0A068CCD7</a> | 3038 ['Ami_2']                      |
| <a href="#">B6DQH9</a>     | 3039 ['Ami_2']                      |
| <a href="#">J3RJW9</a>     | 3040 ['Ami_2']                      |
| <a href="#">A0A068CAR6</a> | 3041 ['Ami_2']                      |
| <a href="#">Q38653</a>     | 3042 ['Ami_2']                      |
| <a href="#">A0A059T8T6</a> | 3043 ['Ami_2']                      |
| <a href="#">A0A088FNU9</a> | 3044 ['Ami_2']                      |
| <a href="#">M4GZZ1</a>     | 3045 ['Ami_2']                      |
| <a href="#">A0A060AC40</a> | 3046 ['Ami_2']                      |
| <a href="#">A0A060AFE7</a> | 3047 ['Ami_2']                      |
| <a href="#">A0A1B0Y4R9</a> | 3048 ['Ami_2']                      |
| <a href="#">Q9MCC8</a>     | 3049 ['Ami_2']                      |

|                            |                               |
|----------------------------|-------------------------------|
| <a href="#">Q9MCC6</a>     | 3050 ['Ami_2']                |
| <a href="#">U5U4H7</a>     | 3051 ['Ami_2']                |
| <a href="#">A0A0N7IR99</a> | 3052 ['Ami_2']                |
| <a href="#">A0A0P0I386</a> | 3053 ['Ami_2']                |
| <a href="#">A0A0P0IX40</a> | 3054 ['Ami_2']                |
| <a href="#">A6MAD8</a>     | 3055 ['Ami_2']                |
| <a href="#">A0A1W6JKF0</a> | 3056 ['Ami_2']                |
| <a href="#">V9VHX3</a>     | 3057 ['Ami_2']                |
| <a href="#">A0A0D3MSS4</a> | 3058 ['Ami_2']                |
| <a href="#">E0YIU2</a>     | 3059 ['Ami_2']                |
| <a href="#">A0A1W6JLI9</a> | 3060 ['Ami_2']                |
| <a href="#">A0A1W6JM05</a> | 3061 ['Ami_2']                |
| <a href="#">Q38135</a>     | 3062 ['Ami_2']                |
| <a href="#">A0A1W6JN27</a> | 3063 ['Ami_2']                |
| <a href="#">V5US95</a>     | 3064 ['Ami_2', 'ZoocinA_TRD'] |
| <a href="#">A0A0S2MY87</a> | 3065 ['Ami_2', 'ZoocinA_TRD'] |
| <a href="#">C0LZY2</a>     | 3066 ['Ami_2', 'ZoocinA_TRD'] |
| <a href="#">A0A4D6DT61</a> | 3067 ['Ami_2', 'ZoocinA_TRD'] |
| <a href="#">A0A411B6N5</a> | 3068 ['Ami_2', 'ZoocinA_TRD'] |
| <a href="#">A0A249XUP0</a> | 3069 ['Ami_2', 'ZoocinA_TRD'] |
| <a href="#">I7B7C3</a>     | 3070 ['Ami_2', 'ZoocinA_TRD'] |
| <a href="#">A0A249XVK1</a> | 3071 ['Ami_2', 'ZoocinA_TRD'] |
| <a href="#">A0A2I7QHI7</a> | 3072 ['Ami_2', 'ZoocinA_TRD'] |
| <a href="#">A0A2S1GSK4</a> | 3073 ['Ami_2', 'ZoocinA_TRD'] |
| <a href="#">A0A1D3SNQ1</a> | 3074 ['Ami_2', 'SH3']         |
| <a href="#">A0A1G5SA77</a> | 3075 ['Ami_2', 'SH3']         |
| <a href="#">A0A4D6DUL4</a> | 3076 ['Ami_2', 'SH3']         |
| <a href="#">A0A2Z5H386</a> | 3077 ['Ami_2', 'SH3']         |
| <a href="#">A0A4D6DVX4</a> | 3078 ['Ami_2', 'SH3']         |
| <a href="#">A0A3S9U820</a> | 3079 ['Ami_2', 'SH3']         |
| <a href="#">A0A4D6DSH8</a> | 3080 ['Ami_2', 'SH3']         |
| <a href="#">A0A249XUE1</a> | 3081 ['Ami_2', 'SH3']         |
| <a href="#">A0A1B1PA07</a> | 3082 ['Ami_2', 'SH3']         |
| <a href="#">A0A139ZVY1</a> | 3083 ['Ami_2', 'SH3']         |
| <a href="#">A0A4D6DV21</a> | 3084 ['Ami_2', 'SH3']         |
| <a href="#">A0A2S1PFE2</a> | 3085 ['Ami_2', 'SH3']         |
| <a href="#">A0A2S1PF52</a> | 3086 ['Ami_2', 'SH3']         |
| <a href="#">A0A2Z4Q002</a> | 3087 ['Ami_2', 'SH3']         |
| <a href="#">A0A1S6L127</a> | 3088 ['CHAP']                 |
| <a href="#">A0A1L7DQ41</a> | 3089 ['CHAP']                 |
| <a href="#">G1C4Z3</a>     | 3090 ['CHAP']                 |
| <a href="#">A0A4D6DT42</a> | 3091 ['CHAP']                 |
| <a href="#">A0A4D6DSL8</a> | 3092 ['CHAP']                 |
| <a href="#">S6CUC3</a>     | 3093 ['CHAP']                 |
| <a href="#">S5MRN1</a>     | 3094 ['CHAP']                 |
| <a href="#">A0A411BIU2</a> | 3095 ['CHAP']                 |

|                            |               |
|----------------------------|---------------|
| <a href="#">X2KRT0</a>     | 3096 ['CHAP'] |
| <a href="#">A0A4Y5TMC4</a> | 3097 ['CHAP'] |
| <a href="#">I4DSK2</a>     | 3098 ['CHAP'] |
| <a href="#">A0A0S2MXW6</a> | 3099 ['CHAP'] |
| <a href="#">A0A4D6BKV8</a> | 3100 ['CHAP'] |
| <a href="#">A0A4D6BJN0</a> | 3101 ['GH24'] |
| <a href="#">I6ZID6</a>     | 3102 ['GH24'] |
| <a href="#">A0A223LGG9</a> | 3103 ['GH24'] |
| <a href="#">E1A185</a>     | 3104 ['GH24'] |
| <a href="#">A0A2S1PEA0</a> | 3105 ['GH24'] |
| <a href="#">Q19CF2</a>     | 3106 ['GH24'] |
| <a href="#">A0A2S1PGU3</a> | 3107 ['GH24'] |
| <a href="#">J7KKQ3</a>     | 3108 ['GH24'] |
| <a href="#">A0A219YC19</a> | 3109 ['GH24'] |
| <a href="#">A0A291LDA0</a> | 3110 ['GH24'] |
| <a href="#">A0A291LEA5</a> | 3111 ['GH24'] |
| <a href="#">A0A411B871</a> | 3112 ['GH24'] |
| <a href="#">E1A2L4</a>     | 3113 ['GH24'] |
| <a href="#">A0A2H4YFB5</a> | 3114 ['GH24'] |
| <a href="#">Q76YA6</a>     | 3115 ['GH24'] |
| <a href="#">E5DQQ0</a>     | 3116 ['GH24'] |
| <a href="#">A0A411BD81</a> | 3117 ['GH24'] |
| <a href="#">Q5G7N2</a>     | 3118 ['GH24'] |
| <a href="#">R9TN12</a>     | 3119 ['GH24'] |
| <a href="#">A0A2R4ALG9</a> | 3120 ['GH24'] |
| <a href="#">A0A3G8F2M1</a> | 3121 ['GH24'] |
| <a href="#">A0A2I7S3P8</a> | 3122 ['GH24'] |
| <a href="#">A0A2I7RTX0</a> | 3123 ['GH24'] |
| <a href="#">A0A2I7S0L3</a> | 3124 ['GH24'] |
| <a href="#">A0A2I7R9W0</a> | 3125 ['GH24'] |
| <a href="#">R9UAZ1</a>     | 3126 ['GH24'] |
| <a href="#">A0A2I7S8G4</a> | 3127 ['GH24'] |
| <a href="#">A0A385GK24</a> | 3128 ['GH24'] |
| <a href="#">K0IMR6</a>     | 3129 ['GH24'] |
| <a href="#">A0A2L0HPR8</a> | 3130 ['GH24'] |
| <a href="#">A0A2K9VHI2</a> | 3131 ['GH24'] |
| <a href="#">I2FLU0</a>     | 3132 ['GH24'] |
| <a href="#">A0A2Z4Q123</a> | 3133 ['GH24'] |
| <a href="#">A0A4Y1NTQ4</a> | 3134 ['GH24'] |
| <a href="#">M1IDZ3</a>     | 3135 ['GH24'] |
| <a href="#">A0A4Y1NUD1</a> | 3136 ['GH24'] |
| <a href="#">A0A0H4A794</a> | 3137 ['GH24'] |
| <a href="#">A0A3G2YTL2</a> | 3138 ['GH24'] |
| <a href="#">A0A1J0GVQ7</a> | 3139 ['GH24'] |
| <a href="#">A0A1Q1PW74</a> | 3140 ['GH24'] |
| <a href="#">A0A4Y1NTQ2</a> | 3141 ['GH24'] |

|                            |                                |
|----------------------------|--------------------------------|
| <a href="#">A0A4Y1NTU6</a> | 3142 ['GH24']                  |
| <a href="#">A0A3Q9R6C9</a> | 3143 ['GH24']                  |
| <a href="#">A0A4Y5P1M6</a> | 3144 ['GH24']                  |
| <a href="#">I3UMC3</a>     | 3145 ['GH24']                  |
| <a href="#">A0A2S1GN54</a> | 3146 ['GH24']                  |
| <a href="#">S4S2D7</a>     | 3147 ['GH24']                  |
| <a href="#">A0A1B1INP2</a> | 3148 ['GH24']                  |
| <a href="#">A0A1I9L2K1</a> | 3149 ['GH24']                  |
| <a href="#">A0A513ZZU2</a> | 3150 ['GH24']                  |
| <a href="#">A0A514A0L5</a> | 3151 ['GH24']                  |
| <a href="#">A0A514A0W5</a> | 3152 ['GH24']                  |
| <a href="#">H9C148</a>     | 3153 ['GH24']                  |
| <a href="#">A0A2I7R771</a> | 3154 ['GH24']                  |
| <a href="#">A0A2Z4Q150</a> | 3155 ['Ami_2', 'LGFP', 'LGFP'] |
| <a href="#">A0A515MHN7</a> | 3156 ['Ami_2', 'LGFP', 'LGFP'] |
| <a href="#">A0A160DG57</a> | 3157 ['Ami_2', 'LGFP', 'LGFP'] |
| <a href="#">A0A166YCP7</a> | 3158 ['Ami_2', 'LGFP', 'LGFP'] |
| <a href="#">A0A249XQ90</a> | 3159 ['Ami_2', 'LGFP', 'LGFP'] |
| <a href="#">A0A1B3B0A6</a> | 3160 ['Ami_2', 'LGFP', 'LGFP'] |
| <a href="#">A0A1B3B0T6</a> | 3161 ['Ami_2', 'LGFP', 'LGFP'] |
| <a href="#">A0A2P1JSD2</a> | 3162 ['Ami_2', 'LGFP', 'LGFP'] |
| <a href="#">A0A4Y5TYE7</a> | 3163 ['Ami_2', 'LGFP', 'LGFP'] |
| <a href="#">A0A0E3T679</a> | 3164 ['Ami_2', 'LGFP', 'LGFP'] |
| <a href="#">A0A385E048</a> | 3165 ['Ami_2', 'LGFP', 'LGFP'] |
| <a href="#">A0A160DD15</a> | 3166 ['LGFP', 'LGFP']          |
| <a href="#">A0A385D1L3</a> | 3167 ['LGFP', 'LGFP']          |
| <a href="#">A0A1B3B095</a> | 3168 ['LGFP', 'LGFP', 'LGFP']  |
| <a href="#">A0A160DCJ5</a> | 3169 ['LGFP']                  |
| <a href="#">A0A3T0IL62</a> | 3170 ['LGFP', 'LGFP']          |
| <a href="#">A0A4Y5TZF9</a> | 3171 ['LGFP']                  |
| <a href="#">A0A385DSB3</a> | 3172 ['LGFP']                  |
| <a href="#">A0A4Y5TZ44</a> | 3173 ['LGFP']                  |
| <a href="#">A0A411AXN0</a> | 3174 ['LGFP']                  |
| <a href="#">A0A514CXC3</a> | 3175 ['LGFP']                  |
| <a href="#">A0A1B3B1V0</a> | 3176 ['LGFP', 'LGFP']          |
| <a href="#">A0A1C9EHY4</a> | 3177 ['LGFP']                  |
| <a href="#">A0A481VUU7</a> | 3178 ['LGFP']                  |
| <a href="#">D6QWN3</a>     | 3179 ['Ami_3', 'SH3']          |
| <a href="#">A0A1I9S5W9</a> | 3180 ['Ami_3', 'SH3']          |
| <a href="#">M4HNC8</a>     | 3181 ['Ami_3', 'SH3']          |
| <a href="#">A0A385E7J7</a> | 3182 ['Ami_3', 'SH3']          |
| <a href="#">A0A219UQL8</a> | 3183 ['Ami_3', 'SH3']          |
| <a href="#">A0A3Q8CHX2</a> | 3184 ['Ami_3', 'SH3']          |
| <a href="#">A0A0E3DEU5</a> | 3185 ['Ami_3', 'SH3']          |
| <a href="#">A0A346TNH1</a> | 3186 ['Ami_3', 'SH3']          |
| <a href="#">G9J241</a>     | 3187 ['Ami_3', 'SH3']          |

|                            |                                         |
|----------------------------|-----------------------------------------|
| <a href="#">A0A218KD91</a> | 3188 ['Ami_3', 'SH3']                   |
| <a href="#">A0A4D6AUD3</a> | 3189 ['Ami_5', 'CW_7', 'GLUCO']         |
| <a href="#">A0A4D6B6E8</a> | 3190 ['Ami_5', 'CW_7', 'GLUCO']         |
| <a href="#">A0A4D6BA45</a> | 3191 ['Ami_5', 'CW_7', 'GLUCO']         |
| <a href="#">A0A4D6AE71</a> | 3192 ['Ami_5', 'CW_7', 'GLUCO']         |
| <a href="#">A0A4D6AJQ7</a> | 3193 ['Ami_5', 'CW_7', 'GLUCO']         |
| <a href="#">A0A4D6AF42</a> | 3194 ['Ami_5', 'CW_7', 'GLUCO']         |
| <a href="#">A0A4D6AEB7</a> | 3195 ['Ami_5', 'CW_7', 'GLUCO']         |
| <a href="#">A0A4D6ADY3</a> | 3196 ['Ami_5', 'CW_7', 'GLUCO']         |
| <a href="#">A0A4D6A067</a> | 3197 ['Ami_5', 'CW_7', 'GLUCO']         |
| <a href="#">A0A4D5ZZT7</a> | 3198 ['Ami_5', 'CW_7', 'GLUCO']         |
| <a href="#">A0A4D6AQV3</a> | 3199 ['Ami_5', 'CW_7', 'GLUCO']         |
| <a href="#">A1EAB6</a>     | 3200 ['Ami_5', 'CW_7', 'CW_7', 'GLUCO'] |
| <a href="#">A0A4D6AJS3</a> | 3201 ['Ami_5', 'CW_7', 'CW_7', 'GLUCO'] |
| <a href="#">A0A4D6AMV4</a> | 3202 ['Ami_5', 'CW_7', 'CW_7', 'GLUCO'] |
| <a href="#">A0A4D6AJE4</a> | 3203 ['Ami_5', 'CW_7', 'CW_7', 'GLUCO'] |
| <a href="#">A0A2L1IVJ9</a> | 3204 ['Ami_2', 'SLT_related']           |
| <a href="#">A0A4D6E0V0</a> | 3205 ['Ami_2', 'SLT_related']           |
| <a href="#">A0A222YYD3</a> | 3206 ['Ami_2', 'LysM', 'SLT_related']   |
| <a href="#">A0A222YZS4</a> | 3207 ['Ami_2', 'LysM', 'SLT_related']   |
| <a href="#">A0A223FZU2</a> | 3208 ['Ami_2', 'LysM', 'SLT_related']   |
| <a href="#">A0A411B613</a> | 3209 ['Ami_2', 'LysM', 'SLT_related']   |
| <a href="#">A0A482JFS3</a> | 3210 ['Ami_2', 'LysM', 'SLT_related']   |
| <a href="#">A0A514U1V4</a> | 3211 ['Ami_2', 'LysM', 'SLT_related']   |
| <a href="#">A0A222Z0G3</a> | 3212 ['Ami_2', 'LysM', 'SLT_related']   |
| <a href="#">A0A222YYH6</a> | 3213 ['Ami_2', 'LysM', 'SLT_related']   |
| <a href="#">A0A0A0RQG1</a> | 3214 ['Ami_2', 'LysM', 'SLT_related']   |
| <a href="#">A0A221SAT9</a> | 3215 ['Ami_2', 'LysM', 'SLT_related']   |
| <a href="#">A0A514DK00</a> | 3216 ['Ami_2', 'LysM', 'SLT_related']   |
| <a href="#">A0A514DET7</a> | 3217 ['Ami_2']                          |
| <a href="#">A0A411CFY3</a> | 3218 ['Ami_2', 'LysM']                  |
| <a href="#">A0A411C4A9</a> | 3219 ['Ami_2', 'LysM']                  |
| <a href="#">A0A345M9R9</a> | 3220 ['Ami_2', 'LysM']                  |
| <a href="#">A0A345L1L5</a> | 3221 ['Ami_2', 'LysM']                  |
| <a href="#">A0A345MDV6</a> | 3222 ['Ami_2', 'LysM']                  |
| <a href="#">A0A385DV03</a> | 3223 ['Ami_2', 'LysM']                  |
| <a href="#">A0A345GT70</a> | 3224 ['Ami_2', 'LysM']                  |
| <a href="#">A0A3Q9R4P8</a> | 3225 ['Ami_2', 'LysM']                  |
| <a href="#">A0A222YW92</a> | 3226 ['Ami_2', 'LysM']                  |
| <a href="#">A0A345MG90</a> | 3227 ['Ami_2', 'LysM']                  |
| <a href="#">A0A345M8H2</a> | 3228 ['Ami_2', 'LysM']                  |
| <a href="#">A0A4Y6EPA6</a> | 3229 ['Ami_2']                          |
| <a href="#">A0A345MH82</a> | 3230 ['Ami_2']                          |
| <a href="#">A0A411AXW9</a> | 3231 ['Ami_2']                          |
| <a href="#">A0A4D6E2L4</a> | 3232 ['Ami_2']                          |
| <a href="#">A0A2Z4QC94</a> | 3233 ['Ami_2', 'PG_1']                  |

|                            |                        |
|----------------------------|------------------------|
| <a href="#">A0A291LGZ3</a> | 3234 ['Ami_2', 'PG_1'] |
| <a href="#">A0A291LHE3</a> | 3235 ['Ami_2', 'PG_1'] |
| <a href="#">A0A291LHU5</a> | 3236 ['Ami_2', 'PG_1'] |
| <a href="#">A0A345MI49</a> | 3237 ['Ami_2', 'PG_1'] |
| <a href="#">A0A411CPT1</a> | 3238 ['Ami_2', 'PG_1'] |
| <a href="#">K4HYE4</a>     | 3239 ['Ami_2']         |
| <a href="#">A0A1J0MCN5</a> | 3240 ['Ami_2']         |
| <a href="#">A0A1J0MD01</a> | 3241 ['Ami_2']         |
| <a href="#">A0A1J0MBU5</a> | 3242 ['Ami_2']         |
| <a href="#">A0A411AXF9</a> | 3243 ['Ami_2']         |
| <a href="#">A0A4D6E0A3</a> | 3244 ['Ami_2', 'LysM'] |
| <a href="#">A0A386K7V8</a> | 3245 ['Ami_2', 'LysM'] |
| <a href="#">D0UWE9</a>     | 3246 ['Ami_2']         |
| <a href="#">A0A386KBJ2</a> | 3247 ['Ami_2']         |
| <a href="#">A0A142K646</a> | 3248 ['Ami_2']         |
| <a href="#">A0A2P1N078</a> | 3249 ['Ami_2']         |
| <a href="#">A0A2D1GP54</a> | 3250 ['Ami_2']         |
| <a href="#">A0A0U4K3I2</a> | 3251 ['Ami_2']         |
| <a href="#">A0A0E3JQE4</a> | 3252 ['Ami_2']         |
| <a href="#">A0A125RNW2</a> | 3253 ['Ami_2']         |
| <a href="#">A0A0S2MU54</a> | 3254 ['Ami_2']         |
| <a href="#">A0A4D6E4T0</a> | 3255 ['Ami_2']         |
| <a href="#">A0A0M4RBB1</a> | 3256 ['Ami_2', 'LysM'] |
| <a href="#">A0A2P1N0I7</a> | 3257 ['Ami_2']         |
| <a href="#">A0A411AY00</a> | 3258 ['Ami_2']         |
| <a href="#">A0A067XGV1</a> | 3259 ['Ami_2']         |
| <a href="#">A0A4D6DTU0</a> | 3260 ['Ami_2']         |
| <a href="#">A0A4D6DRS8</a> | 3261 ['Ami_2']         |
| <a href="#">A0A4D6DT44</a> | 3262 ['Ami_2']         |
| <a href="#">A0A4D6DT39</a> | 3263 ['Ami_2']         |
| <a href="#">A0A4D6DTJ0</a> | 3264 ['Ami_2']         |
| <a href="#">A0A1M4NDT8</a> | 3265 ['Ami_2']         |
| <a href="#">A0A4D6DSZ3</a> | 3266 ['Ami_2']         |
| <a href="#">A0A0S2MY35</a> | 3267 ['Ami_2']         |
| <a href="#">A0A4D6DSR9</a> | 3268 ['Ami_2']         |
| <a href="#">A0A4D6DTK3</a> | 3269 ['Ami_2']         |
| <a href="#">A0A4D6DT87</a> | 3270 ['Ami_2']         |
| <a href="#">A0A288TXU9</a> | 3271 ['Ami_2']         |
| <a href="#">A0A3B8DXR3</a> | 3272 ['Ami_2']         |
| <a href="#">A0A411B7H0</a> | 3273 ['Ami_2']         |
| <a href="#">A0A096XT38</a> | 3274 ['Ami_2']         |
| <a href="#">A0A2Z6FZA5</a> | 3275 ['Ami_2']         |
| <a href="#">A0A4D6DTJ6</a> | 3276 ['Ami_2']         |
| <a href="#">A0A3P5VQX7</a> | 3277 ['Ami_2']         |
| <a href="#">A0A0E3TBA5</a> | 3278 ['Ami_2']         |
| <a href="#">A0A4D6DUM0</a> | 3279 ['Ami_2']         |

|                            |                                       |
|----------------------------|---------------------------------------|
| <a href="#">A8E261</a>     | 3280 ['Ami_2']                        |
| <a href="#">A0A2Z6FZW5</a> | 3281 ['Ami_2']                        |
| <a href="#">B1ABI9</a>     | 3282 ['Ami_2']                        |
| <a href="#">D4N4K8</a>     | 3283 ['Ami_2', 'ZoocinA_TRD']         |
| <a href="#">A0A0D3MK08</a> | 3284 ['Ami_2', 'ZoocinA_TRD']         |
| <a href="#">A0A059PAL4</a> | 3285 ['Ami_2', 'ZoocinA_TRD']         |
| <a href="#">A0A0D3MKG1</a> | 3286 ['Ami_2', 'ZoocinA_TRD']         |
| <a href="#">A0A4D6A680</a> | 3287 ['Ami_2', 'ZoocinA_TRD']         |
| <a href="#">A0A4D6AWQ3</a> | 3288 ['CHAP', 'Ami_2']                |
| <a href="#">A0A291I9H5</a> | 3289 ['GH25', 'SH3', 'LysM']          |
| <a href="#">A0A2K9VDG6</a> | 3290 ['GH25', 'SH3', 'LysM']          |
| <a href="#">A0A3Q8CA00</a> | 3291 ['GH25', 'SH3', 'LysM']          |
| <a href="#">A0A3S7UPN4</a> | 3292 ['GH25', 'SH3', 'LysM']          |
| <a href="#">A0A3Q8HZL4</a> | 3293 ['GH25', 'SH3', 'LysM']          |
| <a href="#">A0A2K9VCM3</a> | 3294 ['GH25', 'SH3', 'LysM']          |
| <a href="#">A0A3S7UPH0</a> | 3295 ['GH25', 'SH3', 'LysM']          |
| <a href="#">A0A2K9V5A4</a> | 3296 ['GH25', 'SH3', 'LysM']          |
| <a href="#">A0A2Z2E736</a> | 3297 ['GH25', 'SH3', 'LysM']          |
| <a href="#">A0A1I9KK58</a> | 3298 ['GH25', 'SH3', 'LysM']          |
| <a href="#">A0A2H4PB98</a> | 3299 ['GH25', 'SH3', 'LysM']          |
| <a href="#">A0A2K9VCD7</a> | 3300 ['GH25', 'SH3', 'LysM']          |
| <a href="#">Q5ULM6</a>     | 3301 ['GH25', 'SH3', 'LysM']          |
| <a href="#">K4I1Y4</a>     | 3302 ['GH25', 'SH3', 'LysM']          |
| <a href="#">A0A1S5RCQ2</a> | 3303 ['GH25', 'SH3', 'LysM']          |
| <a href="#">A0A2P0ZKX1</a> | 3304 ['GH25', 'SH3', 'LysM']          |
| <a href="#">A0A4Y5FFC4</a> | 3305 ['GH25', 'LysM']                 |
| <a href="#">A0A4Y5FEB1</a> | 3306 ['GH25', 'LysM']                 |
| <a href="#">O03950</a>     | 3307 ['GH25', 'SH3', 'LysM']          |
| <a href="#">A0A4Y5FEU1</a> | 3308 ['GH25', 'LysM']                 |
| <a href="#">A0A4Y5FF73</a> | 3309 ['GH25', 'LysM']                 |
| <a href="#">A0A385E984</a> | 3310 ['GH25', 'Ami02_C']              |
| <a href="#">A0A222Z5F8</a> | 3311 ['GH25', 'Ami02_C']              |
| <a href="#">A0A024AZX0</a> | 3312 ['GH25', 'Ami02_C']              |
| <a href="#">A0A024B030</a> | 3313 ['GH25', 'Ami02_C']              |
| <a href="#">A0A482IGD8</a> | 3314 ['GH25', 'LysM', 'LysM', 'LysM'] |
| <a href="#">A0A386K875</a> | 3315 ['GH25', 'LysM', 'LysM']         |
| <a href="#">A0A172JIA8</a> | 3316 ['GH25', 'LysM', 'LysM', 'LysM'] |
| <a href="#">A0A223LD43</a> | 3317 ['GH25', 'LysM', 'LysM', 'LysM'] |
| <a href="#">A0A160LKP9</a> | 3318 ['GH25']                         |
| <a href="#">A0A1Z1LZN8</a> | 3319 ['GH25']                         |
| <a href="#">A0A2H4J966</a> | 3320 ['GH25', 'Ami02_C']              |
| <a href="#">A7KV11</a>     | 3321 ['GH25']                         |
| <a href="#">A0A218KCJ1</a> | 3322 ['GH25']                         |
| <a href="#">A9QTG1</a>     | 3323 ['GH25', 'SH3']                  |
| <a href="#">J9PQX3</a>     | 3324 ['GH25', 'SH3']                  |
| <a href="#">A0A0E3D9B5</a> | 3325 ['GH25', 'SH3']                  |

|                            |                                  |
|----------------------------|----------------------------------|
| <a href="#">X2JN49</a>     | 3326 ['GH25', 'SH3']             |
| <a href="#">A0A385EAG5</a> | 3327 ['GH25', 'SH3']             |
| <a href="#">A0A4P8N7H3</a> | 3328 ['GH25', 'Ami02_C']         |
| <a href="#">I3WTZ2</a>     | 3329 ['GH25', 'Ami02_C']         |
| <a href="#">A0A1B1P783</a> | 3330 ['GH25', 'Ami02_C']         |
| <a href="#">D2XR33</a>     | 3331 ['GH25', 'Ami02_C']         |
| <a href="#">A0A386KSS7</a> | 3332 ['GH25', 'Ami02_C']         |
| <a href="#">A0A1B1PAP0</a> | 3333 ['GH25', 'Ami02_C']         |
| <a href="#">A0A3G8F584</a> | 3334 ['GH25', 'Ami02_C']         |
| <a href="#">A0A1B1PAF8</a> | 3335 ['GH25', 'Ami02_C']         |
| <a href="#">A0A1X9SHN6</a> | 3336 ['GH25', 'Ami02_C']         |
| <a href="#">A0A514AAM8</a> | 3337 ['GH25', 'Ami02_C']         |
| <a href="#">A0A1I9S6P7</a> | 3338 ['GH25', 'Ami02_C']         |
| <a href="#">A0A1B1PAK9</a> | 3339 ['GH25', 'Ami02_C']         |
| <a href="#">A0A223LI94</a> | 3340 ['GH25', 'Ami02_C']         |
| <a href="#">A0A3T0IIX9</a> | 3341 ['GH25', 'Ami02_C']         |
| <a href="#">A0A3T0IJ07</a> | 3342 ['GH25', 'Ami02_C']         |
| <a href="#">A0A3T0IJ27</a> | 3343 ['GH25', 'Ami02_C']         |
| <a href="#">Q0GXT8</a>     | 3344 ['Ami_2']                   |
| <a href="#">A0A455VPF3</a> | 3345 ['Ami_2']                   |
| <a href="#">C3U2S5</a>     | 3346 ['Ami_2']                   |
| <a href="#">A0A1W6JHI7</a> | 3347 ['Ami_2']                   |
| <a href="#">H9AWU1</a>     | 3348 ['Ami_2']                   |
| <a href="#">A0A097BY70</a> | 3349 ['Ami_2']                   |
| <a href="#">D7RWE7</a>     | 3350 ['Ami_2']                   |
| <a href="#">D7RWK6</a>     | 3351 ['Ami_2', 'SH3']            |
| <a href="#">A0A249XZR2</a> | 3352 ['Ami_2']                   |
| <a href="#">A0A0S2MYH4</a> | 3353 ['Ami_2']                   |
| <a href="#">A0A411B6T3</a> | 3354 ['Ami_2']                   |
| <a href="#">A0A4D6AAM3</a> | 3355 ['Ami_2', 'CW_7', 'CW_7']   |
| <a href="#">D9J0J9</a>     | 3356 ['Ami_2', 'SH3']            |
| <a href="#">A0A060AHF9</a> | 3357 ['Ami_2']                   |
| <a href="#">A0A0M4S679</a> | 3358 ['Ami_2']                   |
| <a href="#">A0A1J0MFY3</a> | 3359 ['PET_M23', 'Ami_2', 'SH3'] |
| <a href="#">A0A4P6QXB6</a> | 3360 ['PET_M23', 'Ami_2', 'SH3'] |
| <a href="#">Q4ZD58</a>     | 3361 ['PET_M23', 'Ami_2', 'SH3'] |
| <a href="#">A0A499SHK0</a> | 3362 ['PET_M23', 'Ami_2', 'SH3'] |
| <a href="#">A0A499SJP3</a> | 3363 ['PET_M23', 'Ami_2', 'SH3'] |
| <a href="#">A0A1Q1PW31</a> | 3364 ['Ami_2']                   |
| <a href="#">A0A1Q1PVY4</a> | 3365 ['Ami_2']                   |
| <a href="#">A0A1S6KVC6</a> | 3366 ['Ami_2']                   |
| <a href="#">A0A3G2YSK6</a> | 3367 ['Ami_2']                   |
| <a href="#">A0A3G2YSP8</a> | 3368 ['Ami_2']                   |
| <a href="#">A0A2D0W917</a> | 3369 ['SLT_related']             |
| <a href="#">A0A2D0W9X7</a> | 3370 ['SLT_related']             |
| <a href="#">A0A2D0W9N2</a> | 3371 ['SLT_related']             |

|                            |                                            |
|----------------------------|--------------------------------------------|
| <a href="#">A0A2D0W9F2</a> | 3372 ['SLT_related']                       |
| <a href="#">A0A2D0W997</a> | 3373 ['SLT_related']                       |
| <a href="#">A9J597</a>     | 3374 ['SLT_related']                       |
| <a href="#">A0A411BAT0</a> | 3375 ['SLT_related']                       |
| <a href="#">A0A411BCU2</a> | 3376 ['SLT_related']                       |
| <a href="#">I6WMZ3</a>     | 3377 ['SLT_related']                       |
| <a href="#">A0A0N9ERA0</a> | 3378 ['SLT_related']                       |
| <a href="#">A0A0U1VU02</a> | 3379 ['SLT_related']                       |
| <a href="#">A0A1B0Z008</a> | 3380 ['SLT_related']                       |
| <a href="#">A0A2K8HPC2</a> | 3381 ['SLT_related']                       |
| <a href="#">G4KKM7</a>     | 3382 ['SLT_related']                       |
| <a href="#">A0A291LA05</a> | 3383 ['PROKAR_LIPOPROTEIN', 'SLT_related'] |
| <a href="#">A0A4D6ALT9</a> | 3384 ['LysM', 'CHAP']                      |
| <a href="#">D0R0F0</a>     | 3385 ['Ami_3', 'LysM']                     |
| <a href="#">A0A4D6A394</a> | 3386 ['Ami_3', 'LysM', 'CHAP']             |
| <a href="#">A0A1X9I678</a> | 3387 ['Ami_3', 'LysM', 'CHAP']             |
| <a href="#">A0A1B0RXF2</a> | 3388 ['Ami_3', 'LysM', 'CHAP']             |
| <a href="#">A0A4D6AP35</a> | 3389 ['Ami_3', 'LysM', 'CHAP']             |
| <a href="#">A0A1B0RXL4</a> | 3390 ['Ami_3', 'LysM', 'CHAP']             |
| <a href="#">A0A4D6ACU6</a> | 3391 ['Ami_3', 'LysM', 'CHAP']             |
| <a href="#">A0A4D6AQ16</a> | 3392 ['Ami_3', 'LysM', 'CHAP']             |
| <a href="#">A0A4D6A315</a> | 3393 ['Ami_3', 'LysM', 'CHAP']             |
| <a href="#">A0A4D6ALE7</a> | 3394 ['Ami_3', 'LysM', 'CHAP']             |
| <a href="#">A0A4D5ZY97</a> | 3395 ['Ami_3', 'LysM', 'CHAP']             |
| <a href="#">A0A4D6A4W3</a> | 3396 ['Ami_3', 'LysM', 'CHAP']             |
| <a href="#">A0A4D6AN23</a> | 3397 ['Ami_3']                             |
| <a href="#">A0A4D6B7G6</a> | 3398 ['Ami_3', 'LysM']                     |
| <a href="#">A0A4D6BGQ7</a> | 3399 ['GLUCO']                             |
| <a href="#">A0A4D6BCB3</a> | 3400 ['GLUCO', 'Ami_3']                    |
| <a href="#">A0A4D6AHN4</a> | 3401 ['GLUCO', 'Ami_3', 'LysM']            |
| <a href="#">A0A4D6AIQ0</a> | 3402 ['GLUCO', 'Ami_3', 'LysM']            |
| <a href="#">A0A2Z5HEY5</a> | 3403 ['PET_M23', 'PG_1']                   |
| <a href="#">A0A2Z5H8S4</a> | 3404 ['PET_M23', 'PG_1']                   |
| <a href="#">A0A386KGP3</a> | 3405 ['PET_M23', 'PG_1']                   |
| <a href="#">A0A2Z5H4J3</a> | 3406 ['PET_M23', 'PG_1']                   |
| <a href="#">A0A4Y6EBV5</a> | 3407 ['PET_M23', 'PG_1']                   |
| <a href="#">A0A4Y6EEQ2</a> | 3408 ['PET_M23', 'PG_1']                   |
| <a href="#">A0A2Z5H5J0</a> | 3409 ['PET_M23', 'PG_1']                   |
| <a href="#">A0A2R4A059</a> | 3410 ['PET_M23', 'PG_1']                   |
| <a href="#">A0A3B8DKH0</a> | 3411 ['PET_M23', 'PG_1']                   |
| <a href="#">A0A140G755</a> | 3412 ['CHAP']                              |
| <a href="#">A0A386KNJ3</a> | 3413 ['CHAP']                              |
| <a href="#">A0A222ZIX0</a> | 3414 ['CHAP']                              |
| <a href="#">A0A222Z9J2</a> | 3415 ['CHAP']                              |
| <a href="#">A0A0M4RB81</a> | 3416 ['CHAP']                              |
| <a href="#">A0A0U4K087</a> | 3417 ['CHAP']                              |

|                            |                                |
|----------------------------|--------------------------------|
| <a href="#">A0A222Z9B2</a> | 3418 ['CHAP']                  |
| <a href="#">A0A222Z7U7</a> | 3419 ['CHAP', 'Ami_2']         |
| <a href="#">A0A0U4JEI5</a> | 3420 ['CHAP']                  |
| <a href="#">A0A0U4KRD4</a> | 3421 ['CHAP', 'Ami_2']         |
| <a href="#">A0A288WFW6</a> | 3422 ['Ami_2', 'SH3']          |
| <a href="#">A0A288WFT1</a> | 3423 ['Ami_2', 'SH3']          |
| <a href="#">C7DT94</a>     | 3424 ['Ami_2', 'SH3']          |
| <a href="#">D3WK93</a>     | 3425 ['Ami_2', 'SH3']          |
| <a href="#">A9QTG3</a>     | 3426 ['Ami_2', 'SH3']          |
| <a href="#">A0A288WFQ3</a> | 3427 ['Ami_2', 'SH3']          |
| <a href="#">A0A0A7AQV3</a> | 3428 ['Ami_2', 'SH3']          |
| <a href="#">A0A1B1P878</a> | 3429 ['Ami_2']                 |
| <a href="#">A0A2H4JAS1</a> | 3430 ['Ami_2', 'SH3', 'SH3']   |
| <a href="#">M1HNA7</a>     | 3431 ['Ami_3', 'LysM', 'LysM'] |
| <a href="#">U5PW24</a>     | 3432 ['Ami_3', 'LysM', 'LysM'] |
| <a href="#">U5PTK7</a>     | 3433 ['Ami_3', 'LysM', 'LysM'] |
| <a href="#">M1IEI0</a>     | 3434 ['Ami_3', 'LysM', 'LysM'] |
| <a href="#">M1IDI0</a>     | 3435 ['Ami_3', 'LysM', 'LysM'] |
| <a href="#">U5PWK4</a>     | 3436 ['Ami_3', 'LysM', 'LysM'] |
| <a href="#">M1IQ67</a>     | 3437 ['Ami_3', 'LysM', 'LysM'] |
| <a href="#">A0A1S5QTQ1</a> | 3438 ['Ami_3', 'LysM', 'LysM'] |
| <a href="#">A0A0B5KNE7</a> | 3439 ['GH24']                  |
| <a href="#">A0A4D6CHP3</a> | 3440 ['GH24']                  |
| <a href="#">A0A0B5L5F7</a> | 3441 ['GH24']                  |
| <a href="#">A0A0B5L1J1</a> | 3442 ['GH24']                  |
| <a href="#">L7TJR2</a>     | 3443 ['GH24']                  |
| <a href="#">Q5QF59</a>     | 3444 ['GH24']                  |
| <a href="#">A0A2K8HZR8</a> | 3445 ['GH24']                  |
| <a href="#">A0A481V389</a> | 3446 ['GH24']                  |
| <a href="#">A0A481V442</a> | 3447 ['GH24']                  |
| <a href="#">A0A345ANS5</a> | 3448 ['GH24']                  |
| <a href="#">I6NW41</a>     | 3449 ['GH24']                  |
| <a href="#">Q6V7L5</a>     | 3450 ['GH24']                  |
| <a href="#">C5IHR6</a>     | 3451 ['GH24']                  |
| <a href="#">I6X6V3</a>     | 3452 ['GH24']                  |
| <a href="#">A0A345BQX2</a> | 3453 ['GH24']                  |
| <a href="#">A0A345MKX1</a> | 3454 ['GH24']                  |
| <a href="#">K4JQD1</a>     | 3455 ['GH24']                  |
| <a href="#">A0A1V0E9P9</a> | 3456 ['GH24']                  |
| <a href="#">J3SVU8</a>     | 3457 ['GH24']                  |
| <a href="#">A0A1V0EBQ3</a> | 3458 ['GH24']                  |
| <a href="#">K4JS66</a>     | 3459 ['GH24']                  |
| <a href="#">A0A385E9F7</a> | 3460 ['GH24']                  |
| <a href="#">A0A385EBE6</a> | 3461 ['GH24']                  |
| <a href="#">A0A385EFZ0</a> | 3462 ['GH24']                  |
| <a href="#">K4JRW4</a>     | 3463 ['GH24']                  |

|                            |                       |
|----------------------------|-----------------------|
| <a href="#">A0A385EAH6</a> | 3464 ['GH24']         |
| <a href="#">A0A1W5P530</a> | 3465 ['GH24']         |
| <a href="#">A0A3G8F2G6</a> | 3466 ['GH24']         |
| <a href="#">K9RZW8</a>     | 3467 ['GH24']         |
| <a href="#">A0A0K8IXP8</a> | 3468 ['GH24']         |
| <a href="#">H6UK32</a>     | 3469 ['GH24']         |
| <a href="#">A0A513ZZ78</a> | 3470 ['GH24']         |
| <a href="#">A0A1S5Q8G1</a> | 3471 ['GH24']         |
| <a href="#">A0A249XLC1</a> | 3472 ['GH24']         |
| <a href="#">A0A2P9JZU6</a> | 3473 ['GH24']         |
| <a href="#">I7K3G5</a>     | 3474 ['GH24']         |
| <a href="#">A0A1L7DQJ6</a> | 3475 ['GH24']         |
| <a href="#">A0A1K2IXT0</a> | 3476 ['GH24']         |
| <a href="#">A0A0H4TH14</a> | 3477 ['GH24']         |
| <a href="#">A0A2S1PFQ6</a> | 3478 ['GH24']         |
| <a href="#">A0A411B6J4</a> | 3479 ['GH24']         |
| <a href="#">A9ZT37</a>     | 3480 ['GH24']         |
| <a href="#">R9TQ00</a>     | 3481 ['GH24']         |
| <a href="#">A0A2I7RNI5</a> | 3482 ['GH24']         |
| <a href="#">A0A2S1GLD1</a> | 3483 ['GH24']         |
| <a href="#">I6PBN2</a>     | 3484 ['GH24']         |
| <a href="#">A0A2Z4Q029</a> | 3485 ['GH24']         |
| <a href="#">A0A482IMA4</a> | 3486 ['GH24']         |
| <a href="#">A0A2Z2FFX8</a> | 3487 ['GH24']         |
| <a href="#">A0A482IEL8</a> | 3488 ['GH24']         |
| <a href="#">A0A386K4Y0</a> | 3489 ['GH24']         |
| <a href="#">A0A4D6DXT9</a> | 3490 ['GH24']         |
| <a href="#">A0A140XG79</a> | 3491 ['GH24']         |
| <a href="#">A0A513ZWS7</a> | 3492 ['GH24']         |
| <a href="#">A0A1B0V7G8</a> | 3493 ['GH24']         |
| <a href="#">A0A077SLF3</a> | 3494 ['GH24']         |
| <a href="#">Q71TF3</a>     | 3495 ['GH24']         |
| <a href="#">A0A499QMM1</a> | 3496 ['GH24']         |
| <a href="#">Q94MY6</a>     | 3497 ['GH24']         |
| <a href="#">P51728</a>     | 3498 ['GH24']         |
| <a href="#">Q1I0Z1</a>     | 3499 ['GH24']         |
| <a href="#">A0A0M3LPP5</a> | 3500 ['GH24']         |
| <a href="#">Q19UR6</a>     | 3501 ['GH24']         |
| <a href="#">A0A0M3LPQ1</a> | 3502 ['GH24']         |
| <a href="#">M4W600</a>     | 3503 ['GH24', 'SH3']  |
| <a href="#">A0A1W6JSI0</a> | 3504 ['GH24', 'SH3']  |
| <a href="#">A0A1X9SGL2</a> | 3505 ['GH24', 'SH3']  |
| <a href="#">A0A482MHR6</a> | 3506 ['GH24', 'YkuD'] |
| <a href="#">A0A1L2BWX1</a> | 3507 ['GH24', 'YkuD'] |
| <a href="#">A0A482MIV2</a> | 3508 ['GH24', 'YkuD'] |
| <a href="#">K4I410</a>     | 3509 ['GH24']         |

|                            |                          |
|----------------------------|--------------------------|
| <a href="#">A0A509EQQ2</a> | 3510 ['GH24', 'PG_1']    |
| <a href="#">F4YCN5</a>     | 3511 ['GH24', 'PET_C70'] |
| <a href="#">Q9FZS7</a>     | 3512 ['GH24']            |
| <a href="#">A0A2K9V500</a> | 3513 ['GH24']            |
| <a href="#">H6VUC2</a>     | 3514 ['GH24']            |
| <a href="#">A0A2D2W2U6</a> | 3515 ['GH24']            |
| <a href="#">A0A345BR99</a> | 3516 ['GH24']            |
| <a href="#">A0A345BRQ0</a> | 3517 ['GH24']            |
| <a href="#">L7TM06</a>     | 3518 ['GH24']            |
| <a href="#">A0A0S0N859</a> | 3519 ['GH24']            |
| <a href="#">F8TVP0</a>     | 3520 ['GH24']            |
| <a href="#">K7ZLE2</a>     | 3521 ['GH24']            |
| <a href="#">A0A3B8DKK9</a> | 3522 ['GH24']            |
| <a href="#">A0A0C4K550</a> | 3523 ['GH24']            |
| <a href="#">A0A3G1L3E6</a> | 3524 ['GH24']            |
| <a href="#">F8TV87</a>     | 3525 ['GH24']            |
| <a href="#">G8GWD3</a>     | 3526 ['GH24']            |
| <a href="#">M4ST54</a>     | 3527 ['GH24']            |
| <a href="#">A0A2I5ARC6</a> | 3528 ['GH24', 'PET_M15'] |
| <a href="#">F4YCT6</a>     | 3529 ['GH24', 'PET_M15'] |
| <a href="#">G8EY22</a>     | 3530 ['GH24', 'PET_M15'] |
| <a href="#">Q5GQI3</a>     | 3531 ['GH24']            |
| <a href="#">A0A1D8KUS6</a> | 3532 ['GH24']            |
| <a href="#">F5B3Y3</a>     | 3533 ['GH24']            |
| <a href="#">I3ULI0</a>     | 3534 ['GH24']            |
| <a href="#">A0A514CVS2</a> | 3535 ['GH24']            |
| <a href="#">A0A514CW31</a> | 3536 ['GH24']            |
| <a href="#">A0A514CTT7</a> | 3537 ['GH24']            |
| <a href="#">A0A2S1GMS1</a> | 3538 ['GH24']            |
| <a href="#">A0A2S1GN17</a> | 3539 ['GH24']            |
| <a href="#">A0A2H4P843</a> | 3540 ['GH24']            |
| <a href="#">A0A2S1GML4</a> | 3541 ['GH24']            |
| <a href="#">A0A2S1GMZ6</a> | 3542 ['GH24']            |
| <a href="#">Q0E5W1</a>     | 3543 ['GH24']            |
| <a href="#">D2EBU1</a>     | 3544 ['GH24']            |
| <a href="#">M4SLT8</a>     | 3545 ['PET_C39', 'GH24'] |
| <a href="#">A0A1D7SIM9</a> | 3546 ['PET_C39', 'GH24'] |
| <a href="#">A0A1D7SHE4</a> | 3547 ['PET_C39', 'GH24'] |
| <a href="#">A0A1D7SJE3</a> | 3548 ['PET_C39', 'GH24'] |
| <a href="#">A0A1D7SMF6</a> | 3549 ['PET_C39', 'GH24'] |
| <a href="#">A0A1D7SM75</a> | 3550 ['PET_C39', 'GH24'] |
| <a href="#">A0A1D7SK56</a> | 3551 ['PET_C39', 'GH24'] |
| <a href="#">O56785</a>     | 3552 ['CHAP', 'GLUCO']   |
| <a href="#">Q4ZE13</a>     | 3553 ['CHAP', 'GLUCO']   |
| <a href="#">A0A1J0MFI1</a> | 3554 ['CHAP', 'GLUCO']   |
| <a href="#">A0A494WA46</a> | 3555 ['CHAP', 'GLUCO']   |

|                            |                                |
|----------------------------|--------------------------------|
| <a href="#">A0A499SJZ7</a> | 3556 ['CHAP', 'GLUCO']         |
| <a href="#">A0A499SIF7</a> | 3557 ['CHAP', 'GLUCO']         |
| <a href="#">A0A1J0MF68</a> | 3558 ['CHAP', 'GLUCO']         |
| <a href="#">A0A494WCU8</a> | 3559 ['CHAP', 'GLUCO']         |
| <a href="#">A0A494WIP8</a> | 3560 ['CHAP', 'GLUCO']         |
| <a href="#">Q4ZC50</a>     | 3561 ['CHAP', 'GLUCO']         |
| <a href="#">A1BU73</a>     | 3562 ['CHAP', 'GLUCO']         |
| <a href="#">A1BTX6</a>     | 3563 ['CHAP', 'GLUCO']         |
| <a href="#">A0A1W6JPD6</a> | 3564 ['CHAP', 'GLUCO']         |
| <a href="#">A0A513ZXM8</a> | 3565 ['GLUCO']                 |
| <a href="#">Q4ZCC7</a>     | 3566 ['CHAP', 'GLUCO']         |
| <a href="#">A0A1W6JNR1</a> | 3567 ['CHAP', 'GLUCO']         |
| <a href="#">K4NZK4</a>     | 3568 ['Ami_2']                 |
| <a href="#">A0A0K1Y9U1</a> | 3569 ['Ami_2', 'LysM', 'PG_1'] |
| <a href="#">A0A0K1Y9L3</a> | 3570 ['Ami_2', 'LysM', 'PG_1'] |
| <a href="#">A0A0K1Y9C5</a> | 3571 ['Ami_2', 'LysM', 'PG_1'] |
| <a href="#">A0A1B1PAB5</a> | 3572 ['Ami_2', 'LysM', 'PG_1'] |
| <a href="#">A0A291AVF5</a> | 3573 ['Ami_2', 'LysM', 'PG_1'] |
| <a href="#">A0A291AV60</a> | 3574 ['Ami_2', 'LysM', 'PG_1'] |
| <a href="#">A0A514U360</a> | 3575 ['Ami_2', 'LysM', 'PG_1'] |
| <a href="#">A0A291AW37</a> | 3576 ['Ami_2', 'LysM', 'PG_1'] |
| <a href="#">A0A2P1JTD5</a> | 3577 ['Ami_2']                 |
| <a href="#">A0A291LHM6</a> | 3578 ['Ami_2', 'PG_1']         |
| <a href="#">A0A411CPR5</a> | 3579 ['Ami_2', 'PG_1', 'PG_1'] |
| <a href="#">A0A1J0MC10</a> | 3580 ['Ami_2']                 |
| <a href="#">A0A1J0MCP8</a> | 3581 ['Ami_2']                 |
| <a href="#">A0A1V0E659</a> | 3582 ['Ami_2']                 |
| <a href="#">K4I2E3</a>     | 3583 ['Ami_2']                 |
| <a href="#">I7A9I3</a>     | 3584 ['Ami_2']                 |
| <a href="#">A0A385DNT4</a> | 3585 ['Ami_2']                 |
| <a href="#">A0A0A0RNQ7</a> | 3586 ['PET_M15', 'PG_1']       |
| <a href="#">A0A0S2SXK4</a> | 3587 ['PET_M15', 'PG_1']       |
| <a href="#">A0A0A0RPZ6</a> | 3588 ['PET_M15', 'PG_1']       |
| <a href="#">A0A0C5AFG6</a> | 3589 ['PET_M15', 'PG_1']       |
| <a href="#">U5PW86</a>     | 3590 ['PET_M15', 'PG_1']       |
| <a href="#">U5PWC4</a>     | 3591 ['PET_M15', 'PG_1']       |
| <a href="#">U5PVY5</a>     | 3592 ['PET_M15', 'PG_1']       |
| <a href="#">A0A0S2SY37</a> | 3593 ['PET_M15', 'SH3']        |
| <a href="#">S5Y0K1</a>     | 3594 ['PET_M15', 'SH3']        |
| <a href="#">A0A514A8Z7</a> | 3595 ['PET_M15', 'SH3']        |
| <a href="#">A0A1X9SG19</a> | 3596 ['PET_M15', 'SH3']        |
| <a href="#">H9NAL3</a>     | 3597 ['PET_M15', 'SH3']        |
| <a href="#">U5PWR9</a>     | 3598 ['PET_M15', 'SH3']        |
| <a href="#">A0A059T5H8</a> | 3599 ['PET_M15']               |
| <a href="#">A0A514U6Z2</a> | 3600 ['PET_M15']               |
| <a href="#">J9QRT9</a>     | 3601 ['PET_M15']               |

|                            |                                |
|----------------------------|--------------------------------|
| <a href="#">S4U8N6</a>     | 3602 ['PET_M15']               |
| <a href="#">Q0PRU8</a>     | 3603 ['PET_M15', 'PSA_CBD']    |
| <a href="#">A0A2U8UV78</a> | 3604 ['PET_M15', 'PSA_CBD']    |
| <a href="#">A8ASL5</a>     | 3605 ['PET_M15', 'PSA_CBD']    |
| <a href="#">A8ATW4</a>     | 3606 ['PET_M15']               |
| <a href="#">U5PRL9</a>     | 3607 ['PET_M15', 'SH3', 'SH3'] |
| <a href="#">A0A140HM31</a> | 3608 ['PET_M15', 'SH3', 'SH3'] |
| <a href="#">A0A1V0DZZ3</a> | 3609 ['Ami_3']                 |
| <a href="#">A0A0A8WIC2</a> | 3610 ['Ami_3']                 |
| <a href="#">A0A0A8WE15</a> | 3611 ['Ami_3']                 |
| <a href="#">E2ELK8</a>     | 3612 ['Ami_3']                 |
| <a href="#">F6K8M2</a>     | 3613 ['Ami_3']                 |
| <a href="#">A0A0A8WHU0</a> | 3614 ['Ami_3']                 |
| <a href="#">J9QED4</a>     | 3615 ['Ami_3']                 |
| <a href="#">A0A3G1E396</a> | 3616 ['Ami_3']                 |
| <a href="#">X5JAJ5</a>     | 3617 ['Ami_3']                 |
| <a href="#">A0A090D823</a> | 3618 ['Ami_3']                 |
| <a href="#">B6SBV8</a>     | 3619 ['Ami_3']                 |
| <a href="#">A0A0A8WFX1</a> | 3620 ['Ami_3']                 |
| <a href="#">A0A3G1E3H7</a> | 3621 ['Ami_3']                 |
| <a href="#">A0A090D803</a> | 3622 ['Ami_3']                 |
| <a href="#">D6QWL9</a>     | 3623 ['Ami_3', 'PG_1']         |
| <a href="#">D6QWM4</a>     | 3624 ['Ami_3', 'PG_1']         |
| <a href="#">D6QWM3</a>     | 3625 ['Ami_3', 'PG_1']         |
| <a href="#">D6QWM2</a>     | 3626 ['Ami_3', 'PG_1']         |
| <a href="#">D6QWM1</a>     | 3627 ['Ami_3', 'PG_1']         |
| <a href="#">D6QWM5</a>     | 3628 ['Ami_3', 'PG_1']         |
| <a href="#">D6QWM0</a>     | 3629 ['Ami_3', 'PG_1']         |
| <a href="#">D6QWP5</a>     | 3630 ['Ami_3', 'PG_1']         |
| <a href="#">A0A514A702</a> | 3631 ['SLT_related']           |
| <a href="#">A0A0K1LQC3</a> | 3632 ['SLT_related']           |
| <a href="#">A0A0K2FHY9</a> | 3633 ['SLT_related']           |
| <a href="#">K7NPW3</a>     | 3634 ['SLT_related']           |
| <a href="#">A0A1G4GQA5</a> | 3635 ['SLT_related']           |
| <a href="#">M9V198</a>     | 3636 ['SLT_related']           |
| <a href="#">A0A1W5P0K6</a> | 3637 ['SLT_related']           |
| <a href="#">J7I134</a>     | 3638 Unknown                   |
| <a href="#">E1A1M0</a>     | 3639 Unknown                   |
| <a href="#">I6YMG0</a>     | 3640 Unknown                   |
| <a href="#">J7KES7</a>     | 3641 Unknown                   |
| <a href="#">A0A223LFC0</a> | 3642 Unknown                   |
| <a href="#">A0A240F3V1</a> | 3643 ['SLT_related']           |
| <a href="#">A0A4D6BJX6</a> | 3644 Unknown                   |
| <a href="#">Q6U9J5</a>     | 3645 ['SLT_related']           |
| <a href="#">Q56EQ6</a>     | 3646 ['SLT_related']           |
| <a href="#">A0A482G9U5</a> | 3647 ['SLT_related']           |

|                            |                          |
|----------------------------|--------------------------|
| <a href="#">A0A482GGJ4</a> | 3648 ['SLT_related']     |
| <a href="#">C4MYR3</a>     | 3649 ['SLT_related']     |
| <a href="#">A0A482MM99</a> | 3650 ['SLT_related']     |
| <a href="#">A0A482GDB5</a> | 3651 ['SLT_related']     |
| <a href="#">E3SFK4</a>     | 3652 Unknown             |
| <a href="#">E5DID2</a>     | 3653 ['SLT_related']     |
| <a href="#">A0A1D3RKJ3</a> | 3654 ['SLT_related']     |
| <a href="#">A0A410T5W4</a> | 3655 ['SLT_related']     |
| <a href="#">E5EPS2</a>     | 3656 ['SLT_related']     |
| <a href="#">A0A3Q9R716</a> | 3657 Unknown             |
| <a href="#">A0A4Y1NKH2</a> | 3658 ['SLT_related']     |
| <a href="#">E5E4C1</a>     | 3659 ['SLT_related']     |
| <a href="#">D9I658</a>     | 3660 Unknown             |
| <a href="#">E5EYR4</a>     | 3661 Unknown             |
| <a href="#">A0A126DI76</a> | 3662 ['GH19']            |
| <a href="#">A0A386KDH5</a> | 3663 ['GH19']            |
| <a href="#">A0A4P2UQ66</a> | 3664 ['GH19']            |
| <a href="#">A0A386KLA0</a> | 3665 ['GH19']            |
| <a href="#">A0A386KJS9</a> | 3666 ['GH19']            |
| <a href="#">A0A075DXC4</a> | 3667 ['GH19']            |
| <a href="#">A0A3B8DZ61</a> | 3668 ['GH19']            |
| <a href="#">K4I3B7</a>     | 3669 ['GH19']            |
| <a href="#">A0A2S1GTV8</a> | 3670 ['GH19']            |
| <a href="#">W6AQZ3</a>     | 3671 ['GH19']            |
| <a href="#">A0A481S282</a> | 3672 ['GH19']            |
| <a href="#">D6QWP0</a>     | 3673 ['GH19']            |
| <a href="#">E2GM11</a>     | 3674 ['GH19']            |
| <a href="#">A0A1V0DZ63</a> | 3675 ['GH19']            |
| <a href="#">A0A0F6WBX9</a> | 3676 Unknown             |
| <a href="#">A0A0F6YPI2</a> | 3677 Unknown             |
| <a href="#">L7TRW2</a>     | 3678 Unknown             |
| <a href="#">A0A291AUN6</a> | 3679 Unknown             |
| <a href="#">A0A0X8XCA1</a> | 3680 ['PET_C39', 'GH19'] |
| <a href="#">A0A125T2V9</a> | 3681 ['PET_C39', 'GH19'] |
| <a href="#">A0A2Z4QGM7</a> | 3682 ['GH19']            |
| <a href="#">A0A2Z4QHK0</a> | 3683 ['GH19']            |
| <a href="#">B4UTR7</a>     | 3684 ['GH19']            |
| <a href="#">A0A1B1IY38</a> | 3685 ['GH19']            |
| <a href="#">M4Q3E2</a>     | 3686 ['GH19']            |
| <a href="#">R9U4A9</a>     | 3687 ['GH19']            |
| <a href="#">A0A0N9SIT8</a> | 3688 ['LT_GEWL_like']    |
| <a href="#">A0A1W6JSC2</a> | 3689 ['LT_GEWL_like']    |
| <a href="#">A0A1X9SGN0</a> | 3690 ['LT_GEWL_like']    |
| <a href="#">A0A386KT13</a> | 3691 ['LT_GEWL_like']    |
| <a href="#">A0A1B1PAN2</a> | 3692 ['LT_GEWL_like']    |
| <a href="#">A0A1B1PAK0</a> | 3693 ['LT_GEWL_like']    |

|                            |                                            |
|----------------------------|--------------------------------------------|
| <a href="#">A0A1X9SHL4</a> | 3694 ['LT_GEWL_like']                      |
| <a href="#">A0A1I9S6P5</a> | 3695 ['LT_GEWL_like']                      |
| <a href="#">A0A223LJE1</a> | 3696 ['LT_GEWL_like']                      |
| <a href="#">A0A514AAR3</a> | 3697 ['LT_GEWL_like']                      |
| <a href="#">A0A411B580</a> | 3698 ['CHAP', 'PG_1']                      |
| <a href="#">A0A385DSJ0</a> | 3699 ['CHAP', 'PG_1']                      |
| <a href="#">A0A411CP72</a> | 3700 ['CHAP', 'PG_1']                      |
| <a href="#">A0A385E0L2</a> | 3701 ['CHAP', 'PG_1']                      |
| <a href="#">A0A411CPI2</a> | 3702 ['CHAP', 'PG_1']                      |
| <a href="#">A0A1J0GNX0</a> | 3703 ['CHAP', 'PG_1']                      |
| <a href="#">A0A2H4PGE4</a> | 3704 ['CHAP']                              |
| <a href="#">A0A2H5BLQ0</a> | 3705 ['CHAP', 'PG_1']                      |
| <a href="#">A0A481W0D0</a> | 3706 ['CHAP']                              |
| <a href="#">K4IBM9</a>     | 3707 ['CHAP']                              |
| <a href="#">A0A411CYF9</a> | 3708 ['CHAP']                              |
| <a href="#">A0A4D6E3U7</a> | 3709 ['CHAP']                              |
| <a href="#">A0A411B102</a> | 3710 ['CHAP']                              |
| <a href="#">A0A411B3S5</a> | 3711 ['CHAP']                              |
| <a href="#">A0A411AYU7</a> | 3712 ['CHAP']                              |
| <a href="#">A0A411B2Y7</a> | 3713 ['CHAP']                              |
| <a href="#">A0A2H5BLZ5</a> | 3714 ['CHAP']                              |
| <a href="#">A0A291LH93</a> | 3715 ['CHAP']                              |
| <a href="#">A0A2H5BLB7</a> | 3716 ['CHAP']                              |
| <a href="#">A0A2P1JSZ8</a> | 3717 ['CHAP']                              |
| <a href="#">A0A221J6Q6</a> | 3718 ['Ami_2']                             |
| <a href="#">A0A0U4IPM3</a> | 3719 ['Ami_2']                             |
| <a href="#">A0A482J991</a> | 3720 ['Ami_2']                             |
| <a href="#">A0A4Y5U0A0</a> | 3721 ['Ami_2']                             |
| <a href="#">A0A222ZH75</a> | 3722 ['Ami_2']                             |
| <a href="#">A0A3G3M107</a> | 3723 ['Ami_2']                             |
| <a href="#">A0A3G3LY06</a> | 3724 ['Ami_2']                             |
| <a href="#">A0A286S1R3</a> | 3725 ['CHAP', 'Ami_2']                     |
| <a href="#">A0A0U4JPJ5</a> | 3726 ['CHAP', 'Ami_2']                     |
| <a href="#">A0A0U4IHIO</a> | 3727 ['CHAP', 'Ami_2']                     |
| <a href="#">A0A0U4IT54</a> | 3728 ['CHAP', 'Ami_2']                     |
| <a href="#">A0A0U4K335</a> | 3729 ['PET_M23']                           |
| <a href="#">A0A0M4R0N4</a> | 3730 ['PET_M23']                           |
| <a href="#">A0A222ZHW0</a> | 3731 ['PET_M23']                           |
| <a href="#">A0A222ZHL5</a> | 3732 ['PET_M23']                           |
| <a href="#">A0A221J6Q1</a> | 3733 ['PET_M23']                           |
| <a href="#">A0A4Y5U044</a> | 3734 ['PET_M23']                           |
| <a href="#">Q5ZQZ1</a>     | 3735 ['SLT_related']                       |
| <a href="#">J9SGR6</a>     | 3736 ['PROKAR_LIPOPROTEIN', 'SLT_related'] |
| <a href="#">A0A4Y6EJS6</a> | 3737 ['PROKAR_LIPOPROTEIN', 'SLT_related'] |
| <a href="#">A0A0S4L2W4</a> | 3738 ['PROKAR_LIPOPROTEIN', 'SLT_related'] |
| <a href="#">J9SHG5</a>     | 3739 ['PROKAR_LIPOPROTEIN', 'SLT_related'] |

|                            |                                                |
|----------------------------|------------------------------------------------|
| <a href="#">A0A481V836</a> | 3740 ['PROKAR_LIPOPROTEIN', 'SLT_related']     |
| <a href="#">J9SH25</a>     | 3741 ['PROKAR_LIPOPROTEIN', 'SLT_related']     |
| <a href="#">A0A481V669</a> | 3742 ['PROKAR_LIPOPROTEIN', 'SLT_related']     |
| <a href="#">A0A2H4J7R8</a> | 3743 ['SLT_related']                           |
| <a href="#">A0A2H4J9H7</a> | 3744 ['SLT_related']                           |
| <a href="#">Q6QIC7</a>     | 3745 ['SLT_related']                           |
| <a href="#">A4JWP4</a>     | 3746 ['SLT_related']                           |
| <a href="#">A0A1C3NFR9</a> | 3747 ['SLT_related']                           |
| <a href="#">A0A2P9JZI1</a> | 3748 ['SLT_related']                           |
| <a href="#">B5TA73</a>     | 3749 ['SLT_related']                           |
| <a href="#">U6C6A5</a>     | 3750 ['SLT_related']                           |
| <a href="#">A0A2D1GPR8</a> | 3751 ['Ami_2']                                 |
| <a href="#">A0A385D2Z7</a> | 3752 ['Ami_2']                                 |
| <a href="#">G1D5A2</a>     | 3753 ['Ami_2']                                 |
| <a href="#">A0A1L6BYI8</a> | 3754 ['Ami_2']                                 |
| <a href="#">A0A222YWG6</a> | 3755 ['Ami_2']                                 |
| <a href="#">A0A1C9EHM2</a> | 3756 ['Ami_2']                                 |
| <a href="#">G1JWF2</a>     | 3757 ['Ami_2']                                 |
| <a href="#">A0A0K1LS76</a> | 3758 ['Ami_2']                                 |
| <a href="#">A0A345KTX9</a> | 3759 ['DUF1906', 'LGFP', 'LGFP']               |
| <a href="#">A0A160DGW5</a> | 3760 ['DUF1906', 'LGFP', 'LGFP']               |
| <a href="#">A0A514TZ74</a> | 3761 ['DUF1906', 'LGFP', 'LGFP']               |
| <a href="#">F1B2S6</a>     | 3762 ['Ami_2', 'LGFP', 'LGFP', 'LGFP']         |
| <a href="#">A0A1C9EI81</a> | 3763 ['LGFP', 'LGFP', 'LGFP']                  |
| <a href="#">A0A159B6I5</a> | 3764 ['Ami_2', 'LGFP', 'LGFP', 'LGFP']         |
| <a href="#">G9FHJ0</a>     | 3765 ['Ami_2', 'LGFP', 'LGFP']                 |
| <a href="#">G9FI08</a>     | 3766 ['Ami_2', 'LGFP', 'LGFP', 'LGFP']         |
| <a href="#">M9MUE0</a>     | 3767 ['Ami_2', 'LGFP', 'LGFP', 'LGFP']         |
| <a href="#">A0A1I9SA50</a> | 3768 ['Ami_2', 'LGFP', 'LGFP', 'LGFP', 'LGFP'] |
| <a href="#">A0A2U8ULA6</a> | 3769 ['Ami_2', 'LGFP', 'LGFP', 'LGFP', 'LGFP'] |
| <a href="#">A0A2U8UJS9</a> | 3770 ['Ami_2', 'LGFP', 'LGFP', 'LGFP', 'LGFP'] |
| <a href="#">A0A160DHD6</a> | 3771 ['Ami_2']                                 |
| <a href="#">Q9MBI0</a>     | 3772 ['Ami_2']                                 |
| <a href="#">G9FH47</a>     | 3773 ['Ami_2']                                 |
| <a href="#">D4P733</a>     | 3774 ['Ami_2']                                 |
| <a href="#">A0A0K0N6L7</a> | 3775 ['Ami_2']                                 |
| <a href="#">A0A142KAY0</a> | 3776 ['PET_M23', 'Ami_2']                      |
| <a href="#">A0A385E0G9</a> | 3777 ['Ami_2']                                 |
| <a href="#">A0A3G3MB35</a> | 3778 ['Ami_2']                                 |
| <a href="#">A0A4Y6EMZ2</a> | 3779 ['PET_M23', 'Ami_2']                      |
| <a href="#">A0A385UI25</a> | 3780 ['PET_M23', 'Ami_2']                      |
| <a href="#">A0A3G3LXC7</a> | 3781 ['PET_M23', 'Ami_2']                      |
| <a href="#">A0A514DJG8</a> | 3782 ['PET_M23', 'Ami_2']                      |
| <a href="#">A0A4Y6EMJ0</a> | 3783 ['PET_M23', 'Ami_2']                      |
| <a href="#">A0A385UCI0</a> | 3784 ['PET_M23', 'Ami_2']                      |
| <a href="#">A0A515MK78</a> | 3785 ['PET_M23']                               |

|                            |                                               |
|----------------------------|-----------------------------------------------|
| <a href="#">A0A4Y6EIU7</a> | 3786 ['GH25']                                 |
| <a href="#">A0A1W6JQH9</a> | 3787 ['PET_M23', 'GH25']                      |
| <a href="#">A0A4Y6EMV4</a> | 3788 ['PET_M23', 'GH25']                      |
| <a href="#">A0A2Z4Q8R8</a> | 3789 ['PET_M23', 'GH25']                      |
| <a href="#">D4P815</a>     | 3790 ['PET_M23', 'GH25']                      |
| <a href="#">A0A1P8D5Q3</a> | 3791 ['PET_M23', 'GH25']                      |
| <a href="#">H9EB52</a>     | 3792 ['SLT_related']                          |
| <a href="#">K7RVN3</a>     | 3793 ['SLT_related']                          |
| <a href="#">A0A345MCZ0</a> | 3794 ['SLT_related']                          |
| <a href="#">A0A343UT88</a> | 3795 ['SLT_related']                          |
| <a href="#">A0A384WYL7</a> | 3796 ['SLT_related']                          |
| <a href="#">A0A384WX53</a> | 3797 ['SLT_related']                          |
| <a href="#">A0A384WK54</a> | 3798 ['SLT_related']                          |
| <a href="#">A0A411BJH6</a> | 3799 ['SLT_related']                          |
| <a href="#">A0A0B5A075</a> | 3800 ['Ami_2']                                |
| <a href="#">A0A4D6ALQ3</a> | 3801 ['Ami_2']                                |
| <a href="#">A0A4D6AC33</a> | 3802 ['Ami_2']                                |
| <a href="#">A0A4D6B3L2</a> | 3803 ['Ami_2']                                |
| <a href="#">A0A4D6B353</a> | 3804 ['Ami_2']                                |
| <a href="#">A0A4D6A9N0</a> | 3805 ['Ami_2']                                |
| <a href="#">A0A4D6B1N0</a> | 3806 ['Ami_2']                                |
| <a href="#">A0A386K8H2</a> | 3807 ['CHAP', 'GH25', 'LysM', 'LysM', 'LysM'] |
| <a href="#">A0A0U4JD12</a> | 3808 ['CHAP', 'GH25', 'LysM', 'LysM', 'LysM'] |
| <a href="#">A0A249XND5</a> | 3809 ['CHAP', 'GH25', 'LysM', 'LysM', 'LysM'] |
| <a href="#">A0A1I9SCW9</a> | 3810 ['CHAP', 'GH25', 'LysM', 'LysM', 'LysM'] |
| <a href="#">A0A0A7HER1</a> | 3811 ['CHAP', 'GH25', 'LysM', 'LysM', 'LysM'] |
| <a href="#">A0A286N2U4</a> | 3812 ['CHAP', 'GH25', 'LysM', 'LysM', 'LysM'] |
| <a href="#">A0A075KJD2</a> | 3813 ['GH25', 'SH3']                          |
| <a href="#">U3PJ04</a>     | 3814 ['GH25', 'SH3']                          |
| <a href="#">F7V9F0</a>     | 3815 ['GH25', 'SH3']                          |
| <a href="#">A0A2P1CCE6</a> | 3816 ['GH25', 'SH3']                          |
| <a href="#">F8J1A5</a>     | 3817 ['GH25', 'SH3']                          |
| <a href="#">A0A075KJI2</a> | 3818 ['GH25', 'SH3']                          |
| <a href="#">A0A075KQK4</a> | 3819 ['GH25', 'SH3']                          |
| <a href="#">A0A3Q8I7V4</a> | 3820 Unknown                                  |
| <a href="#">A0A0A7DMK9</a> | 3821 ['GH25', 'LysM', 'SH3']                  |
| <a href="#">A0A3G6JGZ1</a> | 3822 ['GH25', 'LysM', 'SH3']                  |
| <a href="#">E3W8H6</a>     | 3823 ['GH25']                                 |
| <a href="#">A9UJV4</a>     | 3824 ['GH25', 'LysM']                         |
| <a href="#">P33486</a>     | 3825 ['GH25']                                 |
| <a href="#">A0A3G6JME2</a> | 3826 ['GH25']                                 |
| <a href="#">Q38373</a>     | 3827 ['GH25']                                 |
| <a href="#">U3PCM2</a>     | 3828 ['GH25']                                 |
| <a href="#">Q38359</a>     | 3829 ['GH25']                                 |
| <a href="#">A0A3G6JGS6</a> | 3830 ['GH25']                                 |
| <a href="#">Q71JA9</a>     | 3831 ['GH25']                                 |

|                            |                               |
|----------------------------|-------------------------------|
| <a href="#">L0P6H6</a>     | 3832 ['GH25']                 |
| <a href="#">Q6SE63</a>     | 3833 ['GH25', 'SH3']          |
| <a href="#">Q6SEB5</a>     | 3834 ['GH25', 'SH3']          |
| <a href="#">Q38317</a>     | 3835 ['GH25', 'SH3']          |
| <a href="#">Q65YV6</a>     | 3836 ['GH25', 'SH3']          |
| <a href="#">X2CXX8</a>     | 3837 ['GH25', 'SH3']          |
| <a href="#">A0A0D4DD04</a> | 3838 ['Ami_2', 'CHAP']        |
| <a href="#">A0A1W6JNM6</a> | 3839 ['Ami_2', 'CHAP']        |
| <a href="#">A0A1W6JQL2</a> | 3840 ['Ami_2', 'CHAP']        |
| <a href="#">A0A2H4J5A3</a> | 3841 ['Ami_2', 'CHAP']        |
| <a href="#">I6T7G5</a>     | 3842 ['Ami_2', 'CHAP']        |
| <a href="#">H9A0Q2</a>     | 3843 ['Ami_2', 'CHAP']        |
| <a href="#">A0A1X9SIB3</a> | 3844 ['Ami_2']                |
| <a href="#">A0A1P8CMK9</a> | 3845 ['Ami_2']                |
| <a href="#">S4T909</a>     | 3846 ['Ami_2']                |
| <a href="#">A0A455VCL2</a> | 3847 ['Ami_2']                |
| <a href="#">I7DN74</a>     | 3848 ['Ami_2']                |
| <a href="#">A0A0U1ZY89</a> | 3849 ['Ami_2']                |
| <a href="#">A0A1W6JPY4</a> | 3850 ['Ami_2', 'CHAP']        |
| <a href="#">A0A499SSY5</a> | 3851 ['Ami_2']                |
| <a href="#">A0A0K0N745</a> | 3852 ['PET_C39']              |
| <a href="#">A0A4Y6E9P9</a> | 3853 ['PET_C39']              |
| <a href="#">A0A1B3AYA2</a> | 3854 ['PET_C39']              |
| <a href="#">A0A345MIN7</a> | 3855 ['PET_C39']              |
| <a href="#">A0A2D1GFQ1</a> | 3856 ['PET_C39']              |
| <a href="#">A0A410TBZ5</a> | 3857 ['PET_C39']              |
| <a href="#">A0A1B3AZG3</a> | 3858 ['PET_C39']              |
| <a href="#">A0A410TD07</a> | 3859 ['PET_C39']              |
| <a href="#">A0A160DET0</a> | 3860 ['PET_C39']              |
| <a href="#">A0A482JH44</a> | 3861 ['PET_C39']              |
| <a href="#">A0A4Y6E7D0</a> | 3862 ['CHAP']                 |
| <a href="#">Q4ZCZ2</a>     | 3863 ['CHAP']                 |
| <a href="#">A0A075LZV3</a> | 3864 ['CHAP']                 |
| <a href="#">A0A385IRL8</a> | 3865 ['CHAP']                 |
| <a href="#">Q9MBN4</a>     | 3866 ['CHAP']                 |
| <a href="#">A0A1X9SIB5</a> | 3867 ['CHAP', 'SH3']          |
| <a href="#">A0A1X9I9I9</a> | 3868 ['CHAP']                 |
| <a href="#">A0A2S0X9X1</a> | 3869 ['CHAP']                 |
| <a href="#">A0A2H4JBI2</a> | 3870 ['Ami_3']                |
| <a href="#">A0A1W6JNV3</a> | 3871 ['CHAP', 'Ami_3']        |
| <a href="#">A0A2H4J4H5</a> | 3872 ['CHAP', 'Ami_3', 'SH3'] |
| <a href="#">A0A2H4JCA1</a> | 3873 ['CHAP', 'Ami_3', 'SH3'] |
| <a href="#">A1BU77</a>     | 3874 ['CHAP', 'Ami_3']        |
| <a href="#">A0A1W6JPE2</a> | 3875 ['CHAP', 'Ami_3']        |
| <a href="#">I6TG35</a>     | 3876 ['CHAP', 'Ami_3']        |
| <a href="#">A0A1D6Z273</a> | 3877 ['CHAP', 'Ami_3']        |

|                            |                                                                |
|----------------------------|----------------------------------------------------------------|
| <a href="#">A0A2H4JBD0</a> | 3878 ['CHAP', 'Ami_3', 'SH3']                                  |
| <a href="#">A0A2H4J7F3</a> | 3879 ['CHAP', 'Ami_3']                                         |
| <a href="#">A0A2H4JAF4</a> | 3880 ['CHAP', 'Ami_3']                                         |
| <a href="#">A0A0N9SGX6</a> | 3881 ['CHAP', 'Ami_3']                                         |
| <a href="#">O80064</a>     | 3882 ['CHAP', 'Ami_3', 'SH3']                                  |
| <a href="#">A0A1X9I9Y6</a> | 3883 ['Ami_3']                                                 |
| <a href="#">A0A2R3ZXN5</a> | 3884 ['Ami_3', 'SH3']                                          |
| <a href="#">A0A4Y6EB79</a> | 3885 ['Ami_3', 'SH3']                                          |
| <a href="#">A0A4D6E508</a> | 3886 ['Ami_2', 'LysM', 'CW_7', 'CW_7']                         |
| <a href="#">A0A2P1CFA9</a> | 3887 ['Ami_2', 'LysM', 'CW_7', 'CW_7']                         |
| <a href="#">A0A4D6E2K7</a> | 3888 ['Ami_2', 'LysM', 'CW_7', 'CW_7']                         |
| <a href="#">A0A514DGM4</a> | 3889 ['Ami_2', 'LysM', 'CW_7', 'CW_7']                         |
| <a href="#">A0A2P1CFS5</a> | 3890 ['Ami_2', 'LysM', 'CW_7', 'CW_7']                         |
| <a href="#">A0A4D6E595</a> | 3891 ['Ami_2', 'LysM', 'CW_7', 'CW_7']                         |
| <a href="#">A0A0U4JY89</a> | 3892 ['Ami_2', 'CW_7', 'CW_7', 'CW_7']                         |
| <a href="#">A0A386KP63</a> | 3893 ['Ami_2', 'CW_7', 'CW_7', 'CW_7']                         |
| <a href="#">A0A221J6E1</a> | 3894 ['Ami_2', 'CW_7', 'CW_7', 'CW_7']                         |
| <a href="#">A0A222ZJ03</a> | 3895 ['Ami_2', 'CW_7', 'CW_7', 'CW_7']                         |
| <a href="#">A0A222ZGI4</a> | 3896 ['Ami_2', 'CW_7', 'CW_7', 'CW_7', 'CW_7']                 |
| <a href="#">A0A0U4K7B3</a> | 3897 ['Ami_2', 'CW_7', 'CW_7', 'CW_7', 'CW_7']                 |
| <a href="#">A0A218M5S7</a> | 3898 ['Ami_2', 'CW_7', 'CW_7', 'CW_7', 'CW_7']                 |
| <a href="#">A0A345KUG3</a> | 3899 ['Ami_2', 'CW_7', 'CW_7', 'CW_7', 'CW_7']                 |
| <a href="#">A0A1B0WN79</a> | 3900 ['Ami_2']                                                 |
| <a href="#">A0A1B0WNC7</a> | 3901 ['Ami_2']                                                 |
| <a href="#">I3PV40</a>     | 3902 ['Ami_2', 'SH3']                                          |
| <a href="#">I3PV70</a>     | 3903 ['Ami_2', 'SH3']                                          |
| <a href="#">A0A343X847</a> | 3904 ['Ami_2', 'SH3']                                          |
| <a href="#">A0A0A7RTQ5</a> | 3905 ['Ami_2']                                                 |
| <a href="#">A0A0A7RVQ3</a> | 3906 ['Ami_2']                                                 |
| <a href="#">H9YSE7</a>     | 3907 ['Ami_2']                                                 |
| <a href="#">A0A455ZIK7</a> | 3908 ['Ami_2']                                                 |
| <a href="#">W8CPL1</a>     | 3909 ['Ami_2']                                                 |
| <a href="#">A0A0M4S688</a> | 3910 ['Ami_2', 'Ami02_C']                                      |
| <a href="#">A0A3Q8I6A1</a> | 3911 ['Ami_2']                                                 |
| <a href="#">W0FBY3</a>     | 3912 ['Ami_2']                                                 |
| <a href="#">A0A088FLK9</a> | 3913 ['Ami_2']                                                 |
| <a href="#">A0A345MKE4</a> | 3914 ['Ami_2', 'CW_1', 'CW_1', 'CW_1', 'CW_1', 'CW_1', 'CW_1'] |
| <a href="#">I6PBG3</a>     | 3915 ['Ami_2']                                                 |
| <a href="#">A0A219VG62</a> | 3916 ['Ami_2']                                                 |
| <a href="#">A0A1B1SDV2</a> | 3917 ['Ami_2', 'ZoocinA_TRD']                                  |
| <a href="#">A0A3G1I5S8</a> | 3918 ['Ami_2']                                                 |
| <a href="#">Q6PVM5</a>     | 3919 ['PET_M15']                                               |
| <a href="#">A0A1C8HUE2</a> | 3920 ['PET_M15']                                               |
| <a href="#">A0A2I7S6J0</a> | 3921 ['PET_M15']                                               |
| <a href="#">A0A2I7RVH5</a> | 3922 ['PET_M15']                                               |
| <a href="#">A0A2I7S030</a> | 3923 ['PET_M15']                                               |

|                            |                        |
|----------------------------|------------------------|
| <a href="#">A0A2I7RAI7</a> | 3924 ['PET_M15']       |
| <a href="#">R9TNK7</a>     | 3925 ['PET_M15']       |
| <a href="#">M1NW24</a>     | 3926 ['PET_M15']       |
| <a href="#">A0A4Y5TPB3</a> | 3927 ['PET_M15']       |
| <a href="#">A0A3G8FE65</a> | 3928 ['PET_M15']       |
| <a href="#">F1BUL3</a>     | 3929 ['PET_M15']       |
| <a href="#">A0A3G8FED8</a> | 3930 ['PET_M15']       |
| <a href="#">A0A386KPD5</a> | 3931 ['SLT_related']   |
| <a href="#">A0A2Z4QAY5</a> | 3932 ['SLT_related']   |
| <a href="#">A0A2Z4QBH3</a> | 3933 ['SLT_related']   |
| <a href="#">A0A2Z4QC88</a> | 3934 ['SLT_related']   |
| <a href="#">A0A345L2B9</a> | 3935 ['SLT_related']   |
| <a href="#">A0A516KPH5</a> | 3936 ['PET_M15']       |
| <a href="#">A0A2Z4Q640</a> | 3937 ['PET_M15']       |
| <a href="#">A0A481VXF8</a> | 3938 ['PET_M15']       |
| <a href="#">A0A2Z4Q7L4</a> | 3939 ['PET_M15']       |
| <a href="#">A0A2U8UPE1</a> | 3940 ['PET_M15']       |
| <a href="#">A0A4Y5NZW2</a> | 3941 ['PET_M15']       |
| <a href="#">A0A345MHX4</a> | 3942 ['PET_M15']       |
| <a href="#">A0A4Y6ELZ9</a> | 3943 ['PET_M15']       |
| <a href="#">A0A516KUS8</a> | 3944 ['PET_M15']       |
| <a href="#">A0A2U8UHV1</a> | 3945 ['PET_M15']       |
| <a href="#">A0A4P8MUL3</a> | 3946 ['PET_M15']       |
| <a href="#">A0A2U8UIP4</a> | 3947 ['PET_M15']       |
| <a href="#">A0A516KV17</a> | 3948 ['PET_M15']       |
| <a href="#">A0A2Z4QC35</a> | 3949 ['CHAP']          |
| <a href="#">A0A2Z4QBA7</a> | 3950 ['CHAP']          |
| <a href="#">A0A2Z4QBI6</a> | 3951 ['CHAP']          |
| <a href="#">A0A2Z4QC13</a> | 3952 ['CHAP']          |
| <a href="#">A0A345L2C1</a> | 3953 ['CHAP']          |
| <a href="#">A0A386KQY2</a> | 3954 ['CHAP']          |
| <a href="#">A0A2U8UMZ7</a> | 3955 ['Ami_2']         |
| <a href="#">A0A2H4PQW8</a> | 3956 ['Ami_2']         |
| <a href="#">A0A2H4PI36</a> | 3957 ['Ami_2']         |
| <a href="#">A0A2H5BMS6</a> | 3958 ['Ami_2']         |
| <a href="#">A0A2H5BLW9</a> | 3959 ['Ami_2']         |
| <a href="#">A0A2H5BMB2</a> | 3960 ['Ami_2']         |
| <a href="#">A0A2U8UNJ8</a> | 3961 ['Ami_2']         |
| <a href="#">A0A1J0MCQ0</a> | 3962 ['Ami_2']         |
| <a href="#">A0A386KNX3</a> | 3963 ['Ami_2']         |
| <a href="#">A0A0M3LSH2</a> | 3964 ['GH108', 'PG_3'] |
| <a href="#">A0A2H4JOZ0</a> | 3965 ['GH108', 'PG_3'] |
| <a href="#">Q775E1</a>     | 3966 ['GH108', 'PG_3'] |
| <a href="#">K4NWI7</a>     | 3967 ['GH108', 'PG_3'] |
| <a href="#">A0A4P2VP99</a> | 3968 ['GH108', 'PG_3'] |
| <a href="#">A0A0H4ILU0</a> | 3969 ['GH108', 'PG_3'] |

|                            |                          |
|----------------------------|--------------------------|
| <a href="#">A0A1L7R181</a> | 3970 ['GH108', 'PG_3']   |
| <a href="#">A0A1L7QNW6</a> | 3971 ['GH108', 'PG_3']   |
| <a href="#">F4N9V8</a>     | 3972 ['GH108']           |
| <a href="#">A0A088FAJ9</a> | 3973 ['GH108']           |
| <a href="#">A0A4D6DZ51</a> | 3974 ['GH108']           |
| <a href="#">J7FAQ2</a>     | 3975 ['GH108', 'PG_3']   |
| <a href="#">A0A482MF77</a> | 3976 ['GH108', 'PG_3']   |
| <a href="#">M1IDQ5</a>     | 3977 ['GH108', 'PG_3']   |
| <a href="#">A0A1V0DY74</a> | 3978 ['GH108', 'PG_3']   |
| <a href="#">M4QPK9</a>     | 3979 ['GH108', 'PG_3']   |
| <a href="#">A0A1X9HX89</a> | 3980 ['GH108', 'PG_3']   |
| <a href="#">A0A345N008</a> | 3981 ['GH108', 'PG_3']   |
| <a href="#">M5AAF4</a>     | 3982 ['GH108', 'PG_3']   |
| <a href="#">A0A345MT49</a> | 3983 ['GH108']           |
| <a href="#">A0A2I7R9L5</a> | 3984 ['GH108', 'PG_3']   |
| <a href="#">A0A3T0IEM0</a> | 3985 ['GH108', 'PG_3']   |
| <a href="#">G9BW83</a>     | 3986 ['GH108']           |
| <a href="#">A0A0H4SQ70</a> | 3987 ['GH108']           |
| <a href="#">A0A1Y0T0G4</a> | 3988 ['GH108']           |
| <a href="#">A0A219YFC4</a> | 3989 ['GH108']           |
| <a href="#">A0A223W052</a> | 3990 ['GH108']           |
| <a href="#">X4YH20</a>     | 3991 ['Ami_2']           |
| <a href="#">X4YWB9</a>     | 3992 ['Ami_2']           |
| <a href="#">X4YES5</a>     | 3993 ['Ami_2', 'SH3']    |
| <a href="#">X4YGT6</a>     | 3994 ['Ami_2', 'SH3']    |
| <a href="#">B2BTN7</a>     | 3995 ['Ami_2']           |
| <a href="#">A0A4Y5MXB7</a> | 3996 ['Ami_2']           |
| <a href="#">A0A2K9V4C5</a> | 3997 ['PET_M15', 'PG_1'] |
| <a href="#">A0A2K9V3Q0</a> | 3998 ['PET_M15', 'PG_1'] |
| <a href="#">A0A2S1PEK6</a> | 3999 ['PET_M15']         |
| <a href="#">A0A219YB38</a> | 4000 ['PET_M15']         |
| <a href="#">A0A2H4F2T7</a> | 4001 ['PET_M15']         |
| <a href="#">W6AT95</a>     | 4002 ['PET_M15']         |
| <a href="#">A0A2I7RGX8</a> | 4003 ['PET_M15']         |
| <a href="#">C3VVT1</a>     | 4004 ['PET_M15']         |
| <a href="#">A0A384WJ38</a> | 4005 ['PET_M15']         |
| <a href="#">A0A1X9Q107</a> | 4006 ['PET_M15']         |
| <a href="#">A0A1X9Q0X5</a> | 4007 ['PET_M15']         |
| <a href="#">A0A1X9Q111</a> | 4008 ['PET_M15']         |
| <a href="#">A0A2K9V3B7</a> | 4009 ['PET_M15']         |
| <a href="#">A0A2K9V3X1</a> | 4010 ['PET_M15']         |
| <a href="#">I6R9L6</a>     | 4011 ['PET_M15']         |
| <a href="#">A0A2S1GTR8</a> | 4012 ['PET_M15']         |
| <a href="#">A0A0B5A6U7</a> | 4013 ['PET_M15']         |
| <a href="#">A0A0B5A6N7</a> | 4014 ['PET_M15']         |
| <a href="#">A0A514CUV6</a> | 4015 ['PET_M15']         |

|                            |                               |
|----------------------------|-------------------------------|
| <a href="#">A0A514CV07</a> | 4016 ['PET_M15']              |
| <a href="#">S5VVA0</a>     | 4017 ['PET_M15']              |
| <a href="#">C7BGD8</a>     | 4018 ['PET_M15']              |
| <a href="#">R4JMG7</a>     | 4019 ['PET_M15']              |
| <a href="#">D6PEK2</a>     | 4020 ['PET_M15']              |
| <a href="#">A0A345BNM2</a> | 4021 ['PET_M15']              |
| <a href="#">B5TR94</a>     | 4022 ['PET_M15']              |
| <a href="#">A0A345N1W6</a> | 4023 ['PET_M15']              |
| <a href="#">A0A384UIY2</a> | 4024 ['PET_M15']              |
| <a href="#">A0A514AB28</a> | 4025 ['PET_M15']              |
| <a href="#">M1I7M3</a>     | 4026 ['PET_M15']              |
| <a href="#">A0A1B1IRA1</a> | 4027 ['PET_M15']              |
| <a href="#">A0A0K1LKR7</a> | 4028 ['PET_M15']              |
| <a href="#">A0A0K1LLY2</a> | 4029 ['PET_M15']              |
| <a href="#">A0A2I7RZD8</a> | 4030 ['PET_M15']              |
| <a href="#">A0A2I7RH38</a> | 4031 ['PET_M15']              |
| <a href="#">A0A2I7QJL4</a> | 4032 ['PET_M15']              |
| <a href="#">A0A2I7RQK6</a> | 4033 ['PET_M15']              |
| <a href="#">M4T418</a>     | 4034 ['PET_M15']              |
| <a href="#">A0A1J0GV68</a> | 4035 ['PET_M15']              |
| <a href="#">A0A2I7QMI2</a> | 4036 ['PET_M15']              |
| <a href="#">A0A1D9C9S9</a> | 4037 ['PET_M15']              |
| <a href="#">A0A2I7RNV9</a> | 4038 ['PET_M15']              |
| <a href="#">A0A1J0GWE8</a> | 4039 ['PET_M15']              |
| <a href="#">A0A3G8F2K6</a> | 4040 ['PET_M15']              |
| <a href="#">A0A2H5BQ54</a> | 4041 ['PET_M15']              |
| <a href="#">W6E9J9</a>     | 4042 ['PET_M15']              |
| <a href="#">A0A1W6JTJ9</a> | 4043 ['PET_M15']              |
| <a href="#">A0A7I2</a>     | 4044 ['PET_M15']              |
| <a href="#">I6R9P9</a>     | 4045 ['PET_M15']              |
| <a href="#">A0A3G3IQS1</a> | 4046 ['PET_M15']              |
| <a href="#">A0A2I6QQW2</a> | 4047 ['ZoocinA_TRD']          |
| <a href="#">A0A3G8FCB4</a> | 4048 ['ZoocinA_TRD']          |
| <a href="#">A0A2P0VGC2</a> | 4049 ['Ami_5', 'ZoocinA_TRD'] |
| <a href="#">A0A3S5H244</a> | 4050 ['Ami_5', 'ZoocinA_TRD'] |
| <a href="#">Q9T1D1</a>     | 4051 ['Ami_5', 'ZoocinA_TRD'] |
| <a href="#">Q9T1C9</a>     | 4052 ['Ami_5', 'ZoocinA_TRD'] |
| <a href="#">B3GW20</a>     | 4053 ['Ami_5', 'ZoocinA_TRD'] |
| <a href="#">A0A4D6A9R7</a> | 4054 ['Ami_5', 'ZoocinA_TRD'] |
| <a href="#">A0A3G8FCV4</a> | 4055 ['Ami_5', 'ZoocinA_TRD'] |
| <a href="#">A0A516KPW1</a> | 4056 ['CHAP']                 |
| <a href="#">A0A4D6A5T7</a> | 4057 ['CHAP']                 |
| <a href="#">Q6DMS8</a>     | 4058 ['CHAP']                 |
| <a href="#">A0A4D6AEM8</a> | 4059 ['CHAP']                 |
| <a href="#">A0A1P8L6B4</a> | 4060 ['SH3']                  |
| <a href="#">A0A4D6BB83</a> | 4061 ['CHAP', 'SH3']          |

|                            |                                                           |
|----------------------------|-----------------------------------------------------------|
| <a href="#">A0A4D6ANN1</a> | 4062 ['CHAP', 'SH3']                                      |
| <a href="#">A0A4D6BC88</a> | 4063 ['Transposase_InsH_N', 'DDE_Tnp_1_6', 'CHAP', 'SH3'] |
| <a href="#">A0A4D5ZZW3</a> | 4064 ['CHAP']                                             |
| <a href="#">A0A4D6ARN8</a> | 4065 ['CHAP']                                             |
| <a href="#">D3W0F3</a>     | 4066 ['CHAP', 'SH3']                                      |
| <a href="#">A0A0K0MWL2</a> | 4067 ['CHAP']                                             |
| <a href="#">A0A514TYX9</a> | 4068 ['PET_M23']                                          |
| <a href="#">A0A3G2KGI5</a> | 4069 ['PET_M23']                                          |
| <a href="#">A0A3G2KI32</a> | 4070 ['PET_M23']                                          |
| <a href="#">A0A3G2KJ82</a> | 4071 ['PET_M23']                                          |
| <a href="#">A0A3G2KE64</a> | 4072 ['PET_M23']                                          |
| <a href="#">A0A4D6BFW0</a> | 4073 ['Ami_5']                                            |
| <a href="#">A0A288TY66</a> | 4074 ['Ami_5', 'SH3']                                     |
| <a href="#">A0A4Y5TRC1</a> | 4075 ['Ami_5', 'SH3']                                     |
| <a href="#">A0A411B7H2</a> | 4076 ['Ami_5', 'SH3']                                     |
| <a href="#">A0A068EP83</a> | 4077 ['Ami_2', 'SH3', 'SH3']                              |
| <a href="#">S5M947</a>     | 4078 ['Ami_2', 'SH3', 'SH3']                              |
| <a href="#">S5M4J3</a>     | 4079 ['Ami_2', 'SH3', 'SH3']                              |
| <a href="#">A0A3G3BVI7</a> | 4080 ['Ami_2', 'SH3', 'SH3', 'SPOR']                      |
| <a href="#">D6QWM6</a>     | 4081 ['Ami_2']                                            |
| <a href="#">A0A0U4J8N7</a> | 4082 ['Ami_2']                                            |
| <a href="#">S6BFI4</a>     | 4083 ['Ami_2', 'LysM']                                    |
| <a href="#">O64040</a>     | 4084 ['Ami_2', 'SH3', 'SH3']                              |
| <a href="#">A0A1P8CWN6</a> | 4085 ['Ami_2', 'SH3', 'SH3']                              |
| <a href="#">A0A0B5CTW5</a> | 4086 ['Ami_2', 'PSA_CBD']                                 |
| <a href="#">A0A059T7X1</a> | 4087 ['Ami_2', 'PSA_CBD']                                 |
| <a href="#">A0A0B5D123</a> | 4088 ['Ami_2', 'PSA_CBD', 'PSA_CBD']                      |
| <a href="#">Q8W5Y8</a>     | 4089 ['Ami_3', 'PSA_CBD']                                 |
| <a href="#">A8ATJ1</a>     | 4090 ['Ami_3', 'PSA_CBD', 'PSA_CBD']                      |
| <a href="#">Q3T4Y6</a>     | 4091 ['MUR']                                              |
| <a href="#">Q6EDY3</a>     | 4092 ['MUR']                                              |
| <a href="#">Q3T548</a>     | 4093 ['MUR']                                              |
| <a href="#">Q3T4S4</a>     | 4094 ['MUR']                                              |
| <a href="#">A0A0K2FI39</a> | 4095 ['SLT_related']                                      |
| <a href="#">A0A2H4GYF1</a> | 4096 ['SLT_related']                                      |
| <a href="#">A0A0S0N5R0</a> | 4097 ['SLT_related']                                      |
| <a href="#">A0A172PZR7</a> | 4098 ['SLT_related']                                      |
| <a href="#">A0A2H4GY46</a> | 4099 ['SLT_related']                                      |
| <a href="#">V9LZ47</a>     | 4100 Unknown                                              |
| <a href="#">A0A1Q2U346</a> | 4101 ['SLT_related']                                      |
| <a href="#">A0A2I7QI01</a> | 4102 Unknown                                              |
| <a href="#">A0A514A2V6</a> | 4103 ['SLT_related']                                      |
| <a href="#">Q2Z0P3</a>     | 4104 ['EF_HAND_2']                                        |
| <a href="#">A0A223LI74</a> | 4105 Unknown                                              |
| <a href="#">A0A223LIX2</a> | 4106 Unknown                                              |
| <a href="#">A0A411CWC0</a> | 4107 ['PET_M23']                                          |

|                            |                              |
|----------------------------|------------------------------|
| <a href="#">A0A1L4BKS4</a> | 4108 ['PET_M23']             |
| <a href="#">A7XXE4</a>     | 4109 ['PET_M23']             |
| <a href="#">A7XXT9</a>     | 4110 ['PET_M23']             |
| <a href="#">I7DKS9</a>     | 4111 ['PG_1', 'SLT_related'] |
| <a href="#">A0A192Y5C9</a> | 4112 ['PG_1', 'SLT_related'] |
| <a href="#">A0A2D1GR13</a> | 4113 ['PG_1', 'SLT_related'] |
| <a href="#">A0A2Z4QBH5</a> | 4114 ['NLPC_P60']            |
| <a href="#">A0A2Z4QBQ0</a> | 4115 ['NLPC_P60']            |
| <a href="#">A0A345GTN0</a> | 4116 ['NLPC_P60']            |
| <a href="#">A0A345L231</a> | 4117 ['NLPC_P60']            |
| <a href="#">A0A0A0RLD4</a> | 4118 ['NLPC_P60']            |
| <a href="#">A0A222YZ81</a> | 4119 ['NLPC_P60']            |
| <a href="#">A0A514DK65</a> | 4120 ['NLPC_P60']            |
| <a href="#">A0A514U234</a> | 4121 ['NLPC_P60']            |
| <a href="#">A0A2U8UQZ9</a> | 4122 ['NLPC_P60']            |
| <a href="#">A0A2U8UQM8</a> | 4123 ['NLPC_P60']            |
| <a href="#">A0A1J0GVU1</a> | 4124 ['NLPC_P60']            |
| <a href="#">A0A345M702</a> | 4125 ['NLPC_P60']            |
| <a href="#">R9TEW4</a>     | 4126 ['SLT_related']         |
| <a href="#">A0A0D4DBF6</a> | 4127 ['SLT_related']         |
| <a href="#">A0A126HGE4</a> | 4128 ['SLT_related']         |
| <a href="#">Q6WHM4</a>     | 4129 ['SLT_related']         |
| <a href="#">I6W7B3</a>     | 4130 ['SLT_related']         |
| <a href="#">A0A2I7RD74</a> | 4131 ['SLT_related']         |
| <a href="#">A0A2I7QXY7</a> | 4132 Unknown                 |
| <a href="#">A0A2I7R1F1</a> | 4133 Unknown                 |
| <a href="#">A0A088C3L3</a> | 4134 ['SLT_related']         |
| <a href="#">E1A2G3</a>     | 4135 ['SLT_related']         |
| <a href="#">A0A291LDQ3</a> | 4136 ['SLT_related']         |
| <a href="#">E5AFT8</a>     | 4137 ['SLT_related']         |
| <a href="#">A0A1W6DYG9</a> | 4138 Unknown                 |
| <a href="#">A0A4P8W7P5</a> | 4139 ['PET_M15']             |
| <a href="#">A0A4P8WA06</a> | 4140 ['PET_M15']             |
| <a href="#">A0A4P8W691</a> | 4141 ['PET_M15']             |
| <a href="#">A0A4P8W6W7</a> | 4142 ['PET_M15']             |
| <a href="#">A0A4P8W6K2</a> | 4143 ['PET_M15']             |
| <a href="#">A0A4P8W628</a> | 4144 ['PET_M15']             |
| <a href="#">A0A4P8W6M2</a> | 4145 ['PET_M15']             |
| <a href="#">A0A345BNG5</a> | 4146 ['PET_M15']             |
| <a href="#">A0A4V1FW13</a> | 4147 ['PET_M15']             |
| <a href="#">A0A4P8W763</a> | 4148 ['PET_M15']             |
| <a href="#">A0A4P8W735</a> | 4149 ['PET_M15']             |
| <a href="#">A0A4P8WA22</a> | 4150 ['PET_M15']             |
| <a href="#">A0A345BQC9</a> | 4151 ['PET_M15']             |
| <a href="#">A0A4P8W6X2</a> | 4152 ['PET_M15']             |
| <a href="#">A0A345MW16</a> | 4153 ['PET_M15']             |

|                            |                                        |
|----------------------------|----------------------------------------|
| <a href="#">A0A3G2YSX9</a> | 4154 ['PET_M15']                       |
| <a href="#">Q37976</a>     | 4155 ['PET_M15']                       |
| <a href="#">A0A059T7Y8</a> | 4156 ['PET_M15']                       |
| <a href="#">A8ATB8</a>     | 4157 ['PET_M15', 'SH3', 'SH3']         |
| <a href="#">S5YC98</a>     | 4158 ['PET_M15']                       |
| <a href="#">A0A2H4J236</a> | 4159 ['PET_M15', 'PG_1']               |
| <a href="#">F8WPX5</a>     | 4160 ['PET_M15', 'PG_1']               |
| <a href="#">W8EEW7</a>     | 4161 ['PET_M15', 'PG_1']               |
| <a href="#">A0A0E3T6C0</a> | 4162 ['PET_M15', 'PG_1']               |
| <a href="#">U5Q1E4</a>     | 4163 ['PET_M15', 'PG_1']               |
| <a href="#">A0A0E3JT47</a> | 4164 ['PET_M15', 'PG_1']               |
| <a href="#">A8ATR6</a>     | 4165 ['PET_M15', 'PSA_CBD', 'PSA_CBD'] |
| <a href="#">A0A059T5J4</a> | 4166 ['PET_M15', 'PSA_CBD', 'PSA_CBD'] |
| <a href="#">A0A127AWA8</a> | 4167 ['PET_M15', 'PG_1', 'PG_1']       |
| <a href="#">A0A3S9X9Y9</a> | 4168 ['PET_M15', 'PG_1']               |
| <a href="#">A0A217EQM4</a> | 4169 ['PET_M15', 'PG_1', 'PG_1']       |
| <a href="#">A0A2H4J4U2</a> | 4170 ['PET_M15', 'PG_1']               |
| <a href="#">C8CHK7</a>     | 4171 ['PET_M15']                       |
| <a href="#">A0A088C4T8</a> | 4172 ['PET_M15']                       |
| <a href="#">A0A0A7HAX7</a> | 4173 ['PET_M15']                       |
| <a href="#">A0A2D0Z549</a> | 4174 ['PET_M15']                       |
| <a href="#">A0A2D0YYE9</a> | 4175 ['PET_M15']                       |
| <a href="#">R9ZXQ6</a>     | 4176 ['Ami_3']                         |
| <a href="#">R9ZZI3</a>     | 4177 ['Ami_3']                         |
| <a href="#">S0A0K5</a>     | 4178 ['Ami_3']                         |
| <a href="#">A0A0E3XA78</a> | 4179 ['DUF1906']                       |
| <a href="#">A0A0E3T822</a> | 4180 ['DUF1906']                       |
| <a href="#">A0A0K0NKU4</a> | 4181 ['DUF1906']                       |
| <a href="#">A0A1B3B0M0</a> | 4182 ['DUF1906']                       |
| <a href="#">C4NTF2</a>     | 4183 ['Ami_2']                         |
| <a href="#">C4NT73</a>     | 4184 ['Ami_2']                         |
| <a href="#">A0A345AYL4</a> | 4185 ['Ami_2']                         |
| <a href="#">A0A191VYM4</a> | 4186 ['Ami_2']                         |
| <a href="#">A0A2Z4QHJ1</a> | 4187 ['Ami_2']                         |
| <a href="#">A0A3T0IK12</a> | 4188 ['Ami_2']                         |
| <a href="#">A0A3Q9R8T9</a> | 4189 ['Ami_2']                         |
| <a href="#">Q8W6M2</a>     | 4190 ['Ami_2']                         |
| <a href="#">A0A068CC96</a> | 4191 ['Ami_2']                         |
| <a href="#">A0A2H4PGK4</a> | 4192 ['SLT_related']                   |
| <a href="#">A0A0K1YAG1</a> | 4193 ['SLT_related']                   |
| <a href="#">A0A0K1YA75</a> | 4194 ['SLT_related']                   |
| <a href="#">K4PAU3</a>     | 4195 ['SLT_related']                   |
| <a href="#">A0A1J0GQA6</a> | 4196 ['SLT_related']                   |
| <a href="#">A0A2L1IVL5</a> | 4197 ['SLT_related']                   |
| <a href="#">A0A345MG85</a> | 4198 Unknown                           |
| <a href="#">A0A345M8G7</a> | 4199 Unknown                           |

|                            |                                 |
|----------------------------|---------------------------------|
| <a href="#">A0A514U1R7</a> | 4200 ['SLT_related']            |
| <a href="#">A0A0A0RLZ4</a> | 4201 ['SLT_related']            |
| <a href="#">A0A221SAT8</a> | 4202 Unknown                    |
| <a href="#">A0A0M3MYZ4</a> | 4203 ['CHAP']                   |
| <a href="#">A0A3Q8L7S6</a> | 4204 ['CHAP']                   |
| <a href="#">H6WTZ1</a>     | 4205 ['CHAP']                   |
| <a href="#">A0A140G6T8</a> | 4206 ['PET_M23']                |
| <a href="#">A0A222ZJJ6</a> | 4207 ['PET_M23']                |
| <a href="#">A0A222Z8D1</a> | 4208 ['PET_M23']                |
| <a href="#">A0A4D6B2Q1</a> | 4209 ['GLUCO']                  |
| <a href="#">A0A4D6A666</a> | 4210 ['GLUCO']                  |
| <a href="#">S5MAF1</a>     | 4211 ['GLUCO']                  |
| <a href="#">U5P0V3</a>     | 4212 ['GLUCO']                  |
| <a href="#">S5M9Y4</a>     | 4213 ['GLUCO', 'Ami_3']         |
| <a href="#">A0A0A7RUN1</a> | 4214 ['GLUCO']                  |
| <a href="#">A0A1P8VWC2</a> | 4215 ['GLUCO']                  |
| <a href="#">A0A2K9V347</a> | 4216 ['GLUCO']                  |
| <a href="#">G3MB92</a>     | 4217 ['Ami_3', 'LysM', 'GLUCO'] |
| <a href="#">G3MB93</a>     | 4218 ['Ami_3', 'LysM']          |
| <a href="#">D6QWP2</a>     | 4219 ['Ami_3', 'SPOR']          |
| <a href="#">D6QWP3</a>     | 4220 ['Ami_3', 'SPOR']          |
| <a href="#">D6QWM8</a>     | 4221 ['Ami_3', 'SPOR']          |
| <a href="#">A0A0U4JE28</a> | 4222 ['Ami_3']                  |
| <a href="#">D6QWM9</a>     | 4223 ['Ami_3', 'SPOR']          |
| <a href="#">D6QWNO</a>     | 4224 ['Ami_3', 'SPOR']          |
| <a href="#">A0A3B6XHD1</a> | 4225 ['Ami_3']                  |
| <a href="#">A0A2H4JCM7</a> | 4226 ['Ami_3', 'GLUCO']         |
| <a href="#">A0A3G3BWR1</a> | 4227 ['Ami_3', 'SH3']           |
| <a href="#">S0A148</a>     | 4228 ['Ami_3']                  |
| <a href="#">A0A2P1JU23</a> | 4229 ['Ami_3']                  |
| <a href="#">A0A345ASR5</a> | 4230 ['Ami_3']                  |
| <a href="#">A0A0N9SGH1</a> | 4231 ['Ami_3']                  |
| <a href="#">A0A345AVF2</a> | 4232 ['Ami_3']                  |
| <a href="#">A0A481W382</a> | 4233 ['Ami_3']                  |
| <a href="#">A0A059WLJ5</a> | 4234 ['Ami_3']                  |
| <a href="#">A0A067ZJB6</a> | 4235 ['Ami_3']                  |
| <a href="#">A0A3G3BW17</a> | 4236 ['Ami_3']                  |
| <a href="#">A0A482CXV9</a> | 4237 ['Ami_3']                  |
| <a href="#">O48471</a>     | 4238 ['Ami_3']                  |
| <a href="#">M4ZRP4</a>     | 4239 ['Ami_3']                  |
| <a href="#">A0A0K1LMD7</a> | 4240 ['Ami_3', 'SH3']           |
| <a href="#">D6QWM7</a>     | 4241 ['Ami_3', 'SPOR']          |
| <a href="#">E5DV68</a>     | 4242 ['Ami_3', 'SPOR']          |
| <a href="#">A0A290GJY1</a> | 4243 ['Ami_3', 'SPOR']          |
| <a href="#">Q9FZW0</a>     | 4244 ['Ami_3', 'LysM']          |
| <a href="#">A0A0N6W8I1</a> | 4245 ['Ami_3', 'LysM', 'LysM']  |

|                            |                              |
|----------------------------|------------------------------|
| <a href="#">S5M842</a>     | 4246 ['Ami_3', 'Ami02_C']    |
| <a href="#">A0A1B1P7G0</a> | 4247 ['Ami_3', 'Ami02_C']    |
| <a href="#">A0A1D6X870</a> | 4248 ['Ami_3']               |
| <a href="#">A0A3Q9R7T7</a> | 4249 ['Ami_3', 'Ami02_C']    |
| <a href="#">A0A2I7QIN4</a> | 4250 ['Ami_3']               |
| <a href="#">A0A346FK38</a> | 4251 ['Ami_3']               |
| <a href="#">P89923</a>     | 4252 ['Ami_3']               |
| <a href="#">I1TLF9</a>     | 4253 ['Ami_3']               |
| <a href="#">Q5ILA1</a>     | 4254 ['Ami_3', 'SPOR']       |
| <a href="#">B6RT63</a>     | 4255 ['Ami_3', 'Ami02_C']    |
| <a href="#">A0A0A8WIP6</a> | 4256 ['Ami_3']               |
| <a href="#">A0A2R2ZGL3</a> | 4257 ['Ami_3']               |
| <a href="#">A0A2H4J8A3</a> | 4258 ['Ami_3', 'SH3']        |
| <a href="#">Q24LG3</a>     | 4259 ['Ami_3']               |
| <a href="#">I1TJX3</a>     | 4260 ['Ami_3']               |
| <a href="#">A0A1L2BYB1</a> | 4261 ['Ami_3']               |
| <a href="#">A0A2D0WXW5</a> | 4262 ['Ami_3']               |
| <a href="#">F8UBI4</a>     | 4263 ['Ami_3', 'SPOR']       |
| <a href="#">F8UBD2</a>     | 4264 ['Ami_3']               |
| <a href="#">A0A385ISV1</a> | 4265 ['Ami_3']               |
| <a href="#">Q8SBN4</a>     | 4266 ['Ami_3']               |
| <a href="#">A0A0A7RUJ1</a> | 4267 ['Ami_3', 'SPOR']       |
| <a href="#">R9R4A9</a>     | 4268 ['Ami_3']               |
| <a href="#">A0A0B5GYD7</a> | 4269 ['Ami_3']               |
| <a href="#">A0A2I7S6C9</a> | 4270 ['Ami_3']               |
| <a href="#">A0A2I7R243</a> | 4271 ['Ami_3']               |
| <a href="#">A0A0U4I901</a> | 4272 ['Ami_3']               |
| <a href="#">A0A4P8NLL7</a> | 4273 ['Ami_3']               |
| <a href="#">E7D0G0</a>     | 4274 ['Ami_3']               |
| <a href="#">A0A1J0GUZ6</a> | 4275 ['Ami_3']               |
| <a href="#">A0A2P9HY81</a> | 4276 ['Ami_3']               |
| <a href="#">U5PZX6</a>     | 4277 ['Ami_3']               |
| <a href="#">E5EYD9</a>     | 4278 ['Ami_3']               |
| <a href="#">D9I5X4</a>     | 4279 ['Ami_3']               |
| <a href="#">E5EPF0</a>     | 4280 ['Ami_3']               |
| <a href="#">A0A2R4A182</a> | 4281 ['PET_M15']             |
| <a href="#">A0A516KTN2</a> | 4282 ['PET_M15', 'Ami_2']    |
| <a href="#">A0A4D6T6X9</a> | 4283 ['PET_M15']             |
| <a href="#">A0A2R4A103</a> | 4284 ['PET_M15']             |
| <a href="#">A0A514DIJ5</a> | 4285 ['PET_M15']             |
| <a href="#">A0A3G2KD16</a> | 4286 ['PET_M15', 'PG_1']     |
| <a href="#">A0A3G2KA78</a> | 4287 ['PET_M15', 'PG_1']     |
| <a href="#">A0A3G2KDB4</a> | 4288 ['PET_M15', 'PG_1']     |
| <a href="#">A0A2R3ZZI6</a> | 4289 ['PET_M15']             |
| <a href="#">A0A2Z4Q7D8</a> | 4290 ['PET_M15']             |
| <a href="#">A0A1J0GVU2</a> | 4291 ['SLT_related', 'LysM'] |

|                            |                                                 |
|----------------------------|-------------------------------------------------|
| <a href="#">A0A2D0ZMX2</a> | 4292 ['SLT_related']                            |
| <a href="#">A0A1I9SA30</a> | 4293 ['SLT_related']                            |
| <a href="#">A0A2U8UJJ8</a> | 4294 ['SLT_related']                            |
| <a href="#">A0A2U8ULA9</a> | 4295 ['SLT_related']                            |
| <a href="#">Q5GQI4</a>     | 4296 ['PET_C39']                                |
| <a href="#">I3ULH9</a>     | 4297 ['PET_C39']                                |
| <a href="#">I3ULY1</a>     | 4298 ['PET_C70', 'GLUCO']                       |
| <a href="#">A0A096VKH0</a> | 4299 ['PET_C70', 'GLUCO']                       |
| <a href="#">C7F4E4</a>     | 4300 ['GLUCO', 'PET_C70']                       |
| <a href="#">G8CLC4</a>     | 4301 ['GLUCO', 'PET_C70']                       |
| <a href="#">A0A0C4K626</a> | 4302 ['GLUCO', 'PET_C70']                       |
| <a href="#">A0A1L5C2A4</a> | 4303 ['Pesticin_C']                             |
| <a href="#">A0A2H5BFZ4</a> | 4304 ['Pesticin_C']                             |
| <a href="#">M4PYB4</a>     | 4305 ['Pesticin_C']                             |
| <a href="#">A0A2I7RBM4</a> | 4306 ['Pesticin_C']                             |
| <a href="#">A0A2P0VGB4</a> | 4307 ['Ami_5']                                  |
| <a href="#">A0A3G6JGJ4</a> | 4308 ['GH25']                                   |
| <a href="#">A0A514TXN1</a> | 4309 ['PET_M23']                                |
| <a href="#">A0A514TX97</a> | 4310 ['PET_M23']                                |
| <a href="#">A0A3Q9RAN6</a> | 4311 ['PET_M23', 'PG_1']                        |
| <a href="#">A0A4Y6EB99</a> | 4312 ['PET_M23', 'PG_1']                        |
| <a href="#">A0A386KPJ2</a> | 4313 ['PET_M23', 'PG_1']                        |
| <a href="#">A0A4D6T9C0</a> | 4314 ['PET_M23']                                |
| <a href="#">A0A4Y6EE89</a> | 4315 ['PET_M23']                                |
| <a href="#">A0A2U8UQJ7</a> | 4316 ['Ami_2', 'CW_7', 'CW_7']                  |
| <a href="#">A0A2U8UQU9</a> | 4317 ['Ami_2', 'CW_7', 'CW_7']                  |
| <a href="#">A0A4D6B3C2</a> | 4318 ['Ami_2', 'CW_7', 'CW_7', 'CW_7']          |
| <a href="#">A0A4D6AP61</a> | 4319 ['Ami_2', 'CW_7', 'CW_7']                  |
| <a href="#">A0A4D6A2G5</a> | 4320 ['Ami_2', 'CW_7', 'CW_7']                  |
| <a href="#">A0A2K9V338</a> | 4321 ['Ami_2', 'SH3']                           |
| <a href="#">H7BW58</a>     | 4322 ['Ami_2']                                  |
| <a href="#">D6QWN4</a>     | 4323 ['Ami_2', 'SPOR']                          |
| <a href="#">H7BWC9</a>     | 4324 ['Ami_2', 'LysM']                          |
| <a href="#">A0A2H4PI22</a> | 4325 Unknown                                    |
| <a href="#">D6QWN2</a>     | 4326 ['Ami_2', 'LysM']                          |
| <a href="#">A0A222ZES2</a> | 4327 ['LysM', 'LysM']                           |
| <a href="#">A0A1D8EUA5</a> | 4328 ['Ami_2', 'PG_1']                          |
| <a href="#">A0A1D8ETE4</a> | 4329 ['Ami_2', 'PG_1']                          |
| <a href="#">A0A1D8ET80</a> | 4330 ['Ami_2', 'PG_1']                          |
| <a href="#">A0A1W6JRQ3</a> | 4331 ['Ami_2']                                  |
| <a href="#">A0A1L6BZH5</a> | 4332 ['Ami_2']                                  |
| <a href="#">A0A2P1JXS5</a> | 4333 ['DUF1906', 'Ami_2', 'DUF4185']            |
| <a href="#">A0A0K0NKS2</a> | 4334 ['DUF1906', 'Ami_2', 'PET_M23', 'DUF4185'] |
| <a href="#">A0A3S9UC96</a> | 4335 ['DUF1906', 'Ami_2', 'PET_M23', 'DUF4185'] |
| <a href="#">A0A4D6BGJ6</a> | 4336 ['GH25', 'CW_7', 'CW_7']                   |
| <a href="#">A0A2K5B2A3</a> | 4337 ['GH25', 'CW_7', 'CW_7']                   |

|                            |                                         |
|----------------------------|-----------------------------------------|
| <a href="#">A0A0A1ERA5</a> | 4338 ['GH25', 'SH3']                    |
| <a href="#">Q20DB2</a>     | 4339 ['GH25']                           |
| <a href="#">Q9AZ81</a>     | 4340 ['GH25', 'SH3']                    |
| <a href="#">A0A173G9G9</a> | 4341 ['GH25']                           |
| <a href="#">A0A1D8ETQ2</a> | 4342 ['GH25']                           |
| <a href="#">A0A1D8ETP4</a> | 4343 ['GH25']                           |
| <a href="#">A0A2P1CIS8</a> | 4344 ['GH25', 'CW_7', 'LysM']           |
| <a href="#">A0A2P1CIJ7</a> | 4345 ['GH25', 'CW_7', 'LysM']           |
| <a href="#">I3VYU7</a>     | 4346 ['GH25', 'PG_1']                   |
| <a href="#">A0A4D6AST6</a> | 4347 ['GH25', 'LysM', 'LysM']           |
| <a href="#">A0A141HSE6</a> | 4348 ['GH25', 'LysM', 'LysM', 'LysM']   |
| <a href="#">Q0SPG7</a>     | 4349 ['GH25', 'SH3', 'SH3']             |
| <a href="#">I2E8W9</a>     | 4350 ['GH25', 'SH3', 'SH3']             |
| <a href="#">A0A2Z2UC06</a> | 4351 ['GH25']                           |
| <a href="#">D6PSS2</a>     | 4352 ['GH25']                           |
| <a href="#">A0A4Y5FE66</a> | 4353 ['GH25']                           |
| <a href="#">B8R665</a>     | 4354 ['GH25']                           |
| <a href="#">A0A411CQD4</a> | 4355 ['GH25', 'LysM', 'LysM']           |
| <a href="#">F0PIJ7</a>     | 4356 ['GH25']                           |
| <a href="#">A0A2P0ZLG2</a> | 4357 ['GH25']                           |
| <a href="#">A0A2K9V3I9</a> | 4358 ['GH25']                           |
| <a href="#">D9ZNF3</a>     | 4359 ['GH25']                           |
| <a href="#">D0R7H8</a>     | 4360 ['GH25']                           |
| <a href="#">A0A1U9WQS3</a> | 4361 ['GH25', 'LysM', 'LysM', 'LysM']   |
| <a href="#">B6D7J9</a>     | 4362 ['GH25', 'SH3', 'LysM']            |
| <a href="#">A0A345MZG2</a> | 4363 ['GH25', 'CW_7']                   |
| <a href="#">A0A4P8W8G2</a> | 4364 ['GH25']                           |
| <a href="#">A0A514DHM4</a> | 4365 ['PET_M23']                        |
| <a href="#">A0A514DI35</a> | 4366 ['PET_M23']                        |
| <a href="#">A0A2Z4Q731</a> | 4367 ['PET_M23']                        |
| <a href="#">A0A514DDD7</a> | 4368 ['PET_M23']                        |
| <a href="#">A0A386KMI0</a> | 4369 ['PET_M23']                        |
| <a href="#">A0A2Z4Q5M5</a> | 4370 ['PET_M23', 'PG_1', 'PG_1']        |
| <a href="#">A0A2Z4QAM1</a> | 4371 ['PET_M23', 'PG_1', 'PG_1']        |
| <a href="#">A0A3G3M0S2</a> | 4372 ['PET_M23']                        |
| <a href="#">A0A3G3LY09</a> | 4373 ['PET_M23']                        |
| <a href="#">A0A3G2KFZ3</a> | 4374 ['PET_M23']                        |
| <a href="#">A0A3G3M3K7</a> | 4375 ['PET_M23']                        |
| <a href="#">A0A075BS18</a> | 4376 ['GH24', 'PET_M23']                |
| <a href="#">L0LC03</a>     | 4377 ['PET_M23']                        |
| <a href="#">A0A076G6R1</a> | 4378 ['PET_M23']                        |
| <a href="#">A0A1B0XUH3</a> | 4379 ['PET_M23']                        |
| <a href="#">G9BW84</a>     | 4380 ['PET_M23']                        |
| <a href="#">A0A2K9VGT1</a> | 4381 ['PET_M23']                        |
| <a href="#">G9FHH0</a>     | 4382 ['SLT_related', 'PET_M23', 'LysM'] |
| <a href="#">A0A3G2KJ81</a> | 4383 ['PET_M23', 'LysM']                |

|                            |                                        |
|----------------------------|----------------------------------------|
| <a href="#">A0A3G2KCW1</a> | 4384 ['PET_M23', 'PG_1']               |
| <a href="#">A0A4D6T839</a> | 4385 ['PET_M23']                       |
| <a href="#">A0A3G2KEZ6</a> | 4386 ['PET_M23']                       |
| <a href="#">A0A411CQK1</a> | 4387 ['PET_M23']                       |
| <a href="#">A0A3G2KFM1</a> | 4388 ['PET_M23', 'Ami_2']              |
| <a href="#">A0A3G3M6D6</a> | 4389 ['PET_M23']                       |
| <a href="#">A0A3G2KJH4</a> | 4390 ['PET_M23']                       |
| <a href="#">A0A3G3M3C4</a> | 4391 ['PET_M23']                       |
| <a href="#">V5R999</a>     | 4392 ['PET_M23']                       |
| <a href="#">A0A3G2KHR7</a> | 4393 ['PET_M23']                       |
| <a href="#">A0A386KQ61</a> | 4394 ['PET_M23', 'PG_1']               |
| <a href="#">W8P064</a>     | 4395 ['PET_M23']                       |
| <a href="#">A0A3G3LYQ8</a> | 4396 ['NLPC_P60', 'PET_M23']           |
| <a href="#">A0A292GAV4</a> | 4397 ['PET_M23']                       |
| <a href="#">Q859T2</a>     | 4398 ['PET_M23']                       |
| <a href="#">A0A411CVX5</a> | 4399 ['PET_M23']                       |
| <a href="#">A0A451ED88</a> | 4400 ['PET_M23']                       |
| <a href="#">A0A1S5RCR7</a> | 4401 ['LysM', 'SLT_related']           |
| <a href="#">A0A2Z2E9B5</a> | 4402 ['LysM', 'SLT_related']           |
| <a href="#">A0A0A7DN24</a> | 4403 ['LysM', 'SLT_related']           |
| <a href="#">A0A3G6JGZ9</a> | 4404 ['LysM', 'SLT_related']           |
| <a href="#">A0A3G1I5V6</a> | 4405 ['LysM', 'SLT_related']           |
| <a href="#">A0A4Y5FEU0</a> | 4406 ['LysM', 'SLT_related']           |
| <a href="#">L7TMU6</a>     | 4407 ['GH24']                          |
| <a href="#">L7TJA9</a>     | 4408 ['GH24']                          |
| <a href="#">A0A1B2IGM4</a> | 4409 ['SLT_related']                   |
| <a href="#">R4IFH0</a>     | 4410 ['SLT_related']                   |
| <a href="#">A0A1B2ICU1</a> | 4411 ['SLT_related']                   |
| <a href="#">A0A1B2IEY6</a> | 4412 ['SLT_related']                   |
| <a href="#">A0A482IHN6</a> | 4413 ['SLT_related']                   |
| <a href="#">A0A2H5BHL8</a> | 4414 ['SLT_related']                   |
| <a href="#">A0A1S6L1V1</a> | 4415 ['SLT_related']                   |
| <a href="#">W8CZD4</a>     | 4416 ['SLT_related']                   |
| <a href="#">A0A289ZW82</a> | 4417 Unknown                           |
| <a href="#">A0A4Y5TNW4</a> | 4418 ['SLT_related']                   |
| <a href="#">A0A3T0INY9</a> | 4419 ['PG_1']                          |
| <a href="#">A0A0R8VCQ3</a> | 4420 ['Ami_2']                         |
| <a href="#">A0A3T0IDD9</a> | 4421 ['Ami_2', 'PG_1']                 |
| <a href="#">A0A142F1N7</a> | 4422 ['Ami_2', 'PG_1', 'PG_1']         |
| <a href="#">A0A3G3BWD6</a> | 4423 ['Ami_2', 'LysM', 'LysM', 'PG_1'] |
| <a href="#">A0A0S2SXM5</a> | 4424 ['Ami_2', 'LysM', 'PG_1']         |
| <a href="#">A0A3G3BWP3</a> | 4425 ['Ami_2', 'LysM', 'LysM', 'SH3']  |
| <a href="#">A0A1B0T6L3</a> | 4426 ['Ami_2']                         |
| <a href="#">A0A1W6DX33</a> | 4427 ['Ami_2', 'SH3']                  |
| <a href="#">A0A1B0UZW5</a> | 4428 ['Ami_2', 'SH3']                  |
| <a href="#">A0A2Z4QGE6</a> | 4429 ['Ami_2', 'SH3']                  |

|                            |                                        |
|----------------------------|----------------------------------------|
| <a href="#">A0A0B5A5A2</a> | 4430 ['PET_M15']                       |
| <a href="#">F4YXS2</a>     | 4431 ['PG_1', 'PET_M15']               |
| <a href="#">A0A0K0PVI5</a> | 4432 ['PG_1', 'PET_M15']               |
| <a href="#">A0A2I7RPW4</a> | 4433 ['NLPC_P60']                      |
| <a href="#">A0A2I7QVY1</a> | 4434 ['NLPC_P60']                      |
| <a href="#">M4Q149</a>     | 4435 ['NLPC_P60']                      |
| <a href="#">A0A3Q9R5V9</a> | 4436 ['NLPC_P60']                      |
| <a href="#">A0A220YL75</a> | 4437 ['GH24']                          |
| <a href="#">A0A2I7RY31</a> | 4438 ['GH24']                          |
| <a href="#">D7R9U1</a>     | 4439 ['PET_U40']                       |
| <a href="#">A0A1B0WKU4</a> | 4440 ['GH108', 'PG_3']                 |
| <a href="#">Q9MC03</a>     | 4441 ['GH108']                         |
| <a href="#">A0A4E0W528</a> | 4442 ['GH108']                         |
| <a href="#">A0A3G2KA11</a> | 4443 ['Ami_2']                         |
| <a href="#">A0A3G2KER3</a> | 4444 Unknown                           |
| <a href="#">A0A0U4B3G8</a> | 4445 Unknown                           |
| <a href="#">A0A249XLH4</a> | 4446 Unknown                           |
| <a href="#">A0A3G3BY37</a> | 4447 ['Ami_2', 'LysM', 'PG_1']         |
| <a href="#">A0A2Z3EAE0</a> | 4448 ['Ami_2', 'SH3', 'SH3']           |
| <a href="#">D6QWN1</a>     | 4449 ['Ami_2']                         |
| <a href="#">A0A0K2CPP8</a> | 4450 ['Ami_2']                         |
| <a href="#">A0A3G2KAD5</a> | 4451 ['CHAP', 'LysM']                  |
| <a href="#">H7BV84</a>     | 4452 ['GLUCO', 'CHAP', 'CW_7', 'CW_7'] |
| <a href="#">A0A509ER44</a> | 4453 ['CHAP']                          |
| <a href="#">G8EY10</a>     | 4454 ['NLPC_P60']                      |
| <a href="#">M4SNU1</a>     | 4455 ['NLPC_P60']                      |
| <a href="#">M4QR76</a>     | 4456 ['SLT_related']                   |
| <a href="#">A0A345M6Y7</a> | 4457 ['SLT_related']                   |
| <a href="#">A0A386K7V4</a> | 4458 ['SLT_related']                   |
| <a href="#">A0A1J0GVV1</a> | 4459 ['Ami_2']                         |
| <a href="#">A0A1B0XUI0</a> | 4460 ['PET_M15']                       |
| <a href="#">A0A1B0XTX0</a> | 4461 ['PET_M15']                       |
| <a href="#">A0A1B0XUE6</a> | 4462 ['PET_M15']                       |
| <a href="#">A0A514D6Z6</a> | 4463 ['MUR']                           |
| <a href="#">A0A514D4K4</a> | 4464 ['MUR']                           |
| <a href="#">F5B3Y2</a>     | 4465 ['YkuD']                          |
| <a href="#">H2BCV4</a>     | 4466 ['GLUCO', 'YkuD']                 |
| <a href="#">A0A2Z2GUJ4</a> | 4467 ['CHAP']                          |
| <a href="#">A0A3G3BXK0</a> | 4468 Unknown                           |
| <a href="#">I6R1D5</a>     | 4469 ['Ami_3']                         |
| <a href="#">D1LV09</a>     | 4470 ['GH24']                          |
| <a href="#">F4YCR3</a>     | 4471 ['GH24']                          |
| <a href="#">A0A482IE72</a> | 4472 ['GH24']                          |
| <a href="#">R9TQ04</a>     | 4473 ['Ami_2', 'Cu_amine_oxidN1']      |
| <a href="#">A0A249XNN9</a> | 4474 ['Ami_2']                         |
| <a href="#">Q24LH4</a>     | 4475 ['3D', 'NLPC_P60']                |

|                            |                                                           |
|----------------------------|-----------------------------------------------------------|
| <a href="#">A0A345M6Y6</a> | 4476 ['NLPC_P60']                                         |
| <a href="#">A0A1V0DYB6</a> | 4477 ['NLPC_P60']                                         |
| <a href="#">A0A345BR96</a> | 4478 ['NLPC_P60']                                         |
| <a href="#">Q9FZT9</a>     | 4479 ['SLT_related']                                      |
| <a href="#">A0A1U9AK71</a> | 4480 ['PG_3', 'SLT_related']                              |
| <a href="#">U5PT78</a>     | 4481 ['PET_M15']                                          |
| <a href="#">V5Q8V7</a>     | 4482 ['PROKAR_LIPOPROTEIN', 'pesticin_lyz_like2', 'GH24'] |
| <a href="#">Q94ML5</a>     | 4483 ['SLT_related', 'AA_TRNA_LIGASE_II_GLYAB']           |
| <a href="#">C0KIU7</a>     | 4484 ['GLUCO']                                            |
| <a href="#">A0A2P1CIB7</a> | 4485 ['CHAP']                                             |
| <a href="#">A0A345AR88</a> | 4486 ['Ami_5']                                            |
| <a href="#">G4KKR9</a>     | 4487 ['SLT_related']                                      |
| <a href="#">Q859R5</a>     | 4488 ['SLT_related']                                      |
| <a href="#">C8CHM9</a>     | 4489 ['SLT_related']                                      |
| <a href="#">Q7Y4B2</a>     | 4490 ['SLT_related']                                      |
| <a href="#">A0A345API3</a> | 4491 ['SLT_related']                                      |
| <a href="#">A0A0A8J856</a> | 4492 ['SLT_related']                                      |
| <a href="#">A0A1B0XUK8</a> | 4493 Unknown                                              |
| <a href="#">A0A1B0XTZ1</a> | 4494 ['SLT_related']                                      |
| <a href="#">A0A1B0XUA8</a> | 4495 ['SLT_related']                                      |
| <a href="#">A0A3G1GLJ4</a> | 4496 Unknown                                              |
| <a href="#">G4W937</a>     | 4497 ['SLT_related']                                      |
| <a href="#">A0A2H4PJ51</a> | 4498 ['YkuD']                                             |
| <a href="#">A0A3Q8HD45</a> | 4499 ['Ami_2', 'LysM', 'LysM']                            |
| <a href="#">J9PUD3</a>     | 4500 ['GLUCO']                                            |
| <a href="#">A0A2Z4QA43</a> | 4501 ['Ami_2', 'SH3']                                     |
| <a href="#">A0A2K9VH44</a> | 4502 ['Ami_2', 'GLUCO']                                   |
| <a href="#">H7BVK7</a>     | 4503 ['Ami_2', 'GLUCO']                                   |
| <a href="#">H7BUY1</a>     | 4504 ['SLT_related', 'Ami_2', 'SLH']                      |
| <a href="#">A0A345BPY8</a> | 4505 ['SLT_related', 'Ami_2', 'SH3']                      |
| <a href="#">A0A2K9V2U2</a> | 4506 ['SLT_related', 'Ami_2', 'SPOR']                     |
| <a href="#">H7BUU5</a>     | 4507 ['SLT_related']                                      |
| <a href="#">H7BV73</a>     | 4508 ['PROKAR_LIPOPROTEIN', 'SLT_related', 'PG_1']        |
| <a href="#">Q9FZW2</a>     | 4509 ['SLT_related']                                      |
| <a href="#">A0A2Z4GUC1</a> | 4510 ['Ami_5', 'SLT_related']                             |
| <a href="#">A0A1P8VV77</a> | 4511 ['GH25']                                             |
| <a href="#">A0A0U4JCL8</a> | 4512 ['CHAP']                                             |
| <a href="#">F0PILO</a>     | 4513 ['SLT_related']                                      |
| <a href="#">Q7Y3F1</a>     | 4514 ['CHAP']                                             |
| <a href="#">A0A4D6DSD5</a> | 4515 ['CHAP']                                             |

[illegible]





|                |                     |                   |
|----------------|---------------------|-------------------|
| Actinobacteria | Actinobacteria      | Corynebacteriales |
| Proteobacteria | Betaproteobacteria  | Burkholderiales   |
| Proteobacteria | Gammaproteobacteria | Pseudomonadales   |
| Proteobacteria | Betaproteobacteria  | Burkholderiales   |
| Bacteroidetes  | Flavobacteriia      | Flavobacteriales  |
| Proteobacteria | Gammaproteobacteria | Vibrionales       |
| Proteobacteria | Alphaproteobacteria | Caulobacterales   |
| Proteobacteria | Alphaproteobacteria | Caulobacterales   |
| Proteobacteria | Alphaproteobacteria | Sphingomonadales  |
| Unknown        | Unknown             | Unknown           |
| Proteobacteria | Gammaproteobacteria | Oceanospirillales |
| Proteobacteria | Gammaproteobacteria | Pseudomonadales   |
| Proteobacteria | Alphaproteobacteria | Rhizobiales       |
| Proteobacteria | Alphaproteobacteria | Rhizobiales       |
| Proteobacteria | Alphaproteobacteria | Rhizobiales       |
| Proteobacteria | Gammaproteobacteria | Pseudomonadales   |
| Proteobacteria | Gammaproteobacteria | Aeromonadales     |
| Cyanobacteria  | Cyanophyceae        | Synechococcales   |
| Cyanobacteria  | Cyanophyceae        | Synechococcales   |
| Unknown        | Unknown             | Unknown           |
| Cyanobacteria  | Cyanophyceae        | Synechococcales   |
| Cyanobacteria  | Cyanophyceae        | Synechococcales   |
| Cyanobacteria  | Cyanophyceae        | Synechococcales   |
| Proteobacteria | Gammaproteobacteria | Xanthomonadales   |

|                |                     |                  |
|----------------|---------------------|------------------|
| Proteobacteria | Gammaproteobacteria | Xanthomonadales  |
| Proteobacteria | Gammaproteobacteria | Xanthomonadales  |
| Proteobacteria | Gammaproteobacteria | Aeromonadales    |
| Proteobacteria | Gammaproteobacteria | Enterobacterales |
| Proteobacteria | Gammaproteobacteria | Pseudomonadales  |
| Proteobacteria | Gammaproteobacteria | Pseudomonadales  |
| Proteobacteria | Gammaproteobacteria | Pseudomonadales  |
| Unknown        | Unknown             | Unknown          |
| Proteobacteria | Gammaproteobacteria | Pseudomonadales  |
| Unknown        | Unknown             | Unknown          |
| Cyanobacteria  | Cyanophyceae        | Chroococcales    |
| Cyanobacteria  | Cyanophyceae        | Chroococcales    |
| Proteobacteria | Alphaproteobacteria | Rhizobiales      |
| Proteobacteria | Alphaproteobacteria | Sphingomonadales |
| Unknown        | Unknown             | Unknown          |
| Unknown        | Unknown             | Unknown          |
| Unknown        | Unknown             | Unknown          |
| Bacteroidetes  | Flavobacteriia      | Flavobacteriales |
| Proteobacteria | Betaproteobacteria  | Burkholderiales  |
| Proteobacteria | Gammaproteobacteria | Enterobacterales |
| Proteobacteria | Gammaproteobacteria | Aeromonadales    |
| Proteobacteria | Gammaproteobacteria | Enterobacterales |
| Proteobacteria | Gammaproteobacteria | Enterobacterales |
| Proteobacteria | Gammaproteobacteria | Enterobacterales |
| Unknown        | Unknown             | Unknown          |
| Proteobacteria | Gammaproteobacteria | Enterobacterales |

[illegible]

[illegible]

[illegible]

[illegible]

[illegible]

[illegible]

[illegible]

[illegible]

|                |                    |                 |
|----------------|--------------------|-----------------|
| Firmicutes     | Bacilli            | Bacillales      |
| Unknown        | Unknown            | Unknown         |
| Firmicutes     | Bacilli            | Bacillales      |
| Unknown        | Unknown            | Unknown         |
| Firmicutes     | Bacilli            | Bacillales      |
| Firmicutes     | Bacilli            | Lactobacillales |
| Firmicutes     | Bacilli            | Bacillales      |
| Firmicutes     | Bacilli            | Bacillales      |
| Firmicutes     | Bacilli            | Lactobacillales |
| Firmicutes     | Bacilli            | Bacillales      |
| Firmicutes     | Bacilli            | Lactobacillales |
| Firmicutes     | Bacilli            | Lactobacillales |
| Firmicutes     | Bacilli            | Bacillales      |
| Proteobacteria | Betaproteobacteria | Burkholderiales |
| Proteobacteria | Betaproteobacteria | Burkholderiales |
| Proteobacteria | Betaproteobacteria | Burkholderiales |

[illegible]

[illegible]

|                |                     |                     |
|----------------|---------------------|---------------------|
| Proteobacteria | Alphaproteobacteria | Caulobacterales     |
| Proteobacteria | Gammaproteobacteria | Enterobacterales    |
| Proteobacteria | Gammaproteobacteria | Aeromonadales       |
| Proteobacteria | Gammaproteobacteria | Enterobacterales    |
| Proteobacteria | Gammaproteobacteria | Aeromonadales       |
| Proteobacteria | Gammaproteobacteria | Aeromonadales       |
| Proteobacteria | Gammaproteobacteria | Vibrionales         |
| Proteobacteria | Gammaproteobacteria | Vibrionales         |
| Proteobacteria | Gammaproteobacteria | Vibrionales         |
| Proteobacteria | Gammaproteobacteria | Enterobacterales    |
| Proteobacteria | Gammaproteobacteria | Enterobacterales    |
| Proteobacteria | Gammaproteobacteria | Pasteurellales      |
| Proteobacteria | Gammaproteobacteria | Enterobacterales    |
| Unknown        | Unknown             | Unknown             |
| Proteobacteria | Gammaproteobacteria | Enterobacterales    |
| Proteobacteria | Gammaproteobacteria | Pasteurellales      |
| Firmicutes     | Bacilli             | Bacillales          |
| Firmicutes     | Bacilli             | Bacillales          |
| Firmicutes     | Bacilli             | Bacillales          |
| Cyanobacteria  | Cyanophyceae        | Nostocales          |
| Cyanobacteria  | Cyanophyceae        | Nostocales          |
| Cyanobacteria  | Cyanophyceae        | Nostocales          |
| Proteobacteria | Acidithiobacillia   | Acidithiobacillales |

|                |                     |                  |
|----------------|---------------------|------------------|
| Unknown        | Unknown             | Unknown          |
| Cyanobacteria  | Cyanophyceae        | Synechococcales  |
| Proteobacteria | Gammaproteobacteria | Enterobacterales |
| Unknown        | Unknown             | Unknown          |
| Unknown        | Unknown             | Unknown          |
| Proteobacteria | Alphaproteobacteria | Rhizobiales      |
| Proteobacteria | Gammaproteobacteria | Pseudomonadales  |
| Unknown        | Unknown             | Unknown          |
| Proteobacteria | Gammaproteobacteria | Xanthomonadales  |
| Proteobacteria | Betaproteobacteria  | Burkholderiales  |
| Cyanobacteria  | Cyanophyceae        | Synechococcales  |
| Cyanobacteria  | Cyanophyceae        | Synechococcales  |
| Unknown        | Unknown             | Unknown          |
| Proteobacteria | Alphaproteobacteria | Rhodobacterales  |
| Proteobacteria | Alphaproteobacteria | Rhodobacterales  |
| Cyanobacteria  | Cyanophyceae        | Synechococcales  |
| Proteobacteria | Betaproteobacteria  | Burkholderiales  |
| Proteobacteria | Betaproteobacteria  | Burkholderiales  |
| Proteobacteria | Betaproteobacteria  | Burkholderiales  |
| Proteobacteria | Gammaproteobacteria | Pseudomonadales  |
| Cyanobacteria  | Cyanophyceae        | Synechococcales  |
| Firmicutes     | Bacilli             | Bacillales       |

[illegible]

[illegible]

|                |                     |                  |
|----------------|---------------------|------------------|
| Proteobacteria | Gammaproteobacteria | Enterobacterales |
| Proteobacteria | Gammaproteobacteria | Pseudomonadales  |
| Unknown        | Unknown             | Unknown          |
| Proteobacteria | Gammaproteobacteria | Pseudomonadales  |
| Proteobacteria | Gammaproteobacteria | Pseudomonadales  |
| Proteobacteria | Alphaproteobacteria | Rhizobiales      |
| Cyanobacteria  | Cyanophyceae        | Synechococcales  |
| Cyanobacteria  | Cyanophyceae        | Synechococcales  |
| Proteobacteria | Alphaproteobacteria | Rhodobacterales  |
| Proteobacteria | Alphaproteobacteria | Rhodobacterales  |
| Proteobacteria | Alphaproteobacteria | Rhizobiales      |
| Proteobacteria | Alphaproteobacteria | Unknown          |
| Unknown        | Unknown             | Unknown          |
| Proteobacteria | Alphaproteobacteria | Rhizobiales      |
| Firmicutes     | Bacilli             | Bacillales       |
| Firmicutes     | Bacilli             | Bacillales       |
| Firmicutes     | Bacilli             | Bacillales       |
| Unknown        | Unknown             | Unknown          |
| Firmicutes     | Bacilli             | Bacillales       |
| Firmicutes     | Bacilli             | Bacillales       |

|                |                     |                  |
|----------------|---------------------|------------------|
| Firmicutes     | Bacilli             | Bacillales       |
| Unknown        | Unknown             | Unknown          |
| Firmicutes     | Bacilli             | Bacillales       |
| Firmicutes     | Bacilli             | Bacillales       |
| Actinobacteria | Actinobacteria      | Streptomycetales |
| Actinobacteria | Actinobacteria      | Micrococcales    |
| Proteobacteria | Gammaproteobacteria | Pseudomonadales  |

[illegible]

|                |                     |                   |
|----------------|---------------------|-------------------|
| Actinobacteria | Actinobacteria      | Corynebacteriales |
| Proteobacteria | Gammaproteobacteria | Vibrionales       |
| Firmicutes     | Bacilli             | Lactobacillales   |
| Actinobacteria | Actinobacteria      | Micrococcales     |
| Firmicutes     | Bacilli             | Lactobacillales   |
| Unknown        | Unknown             | Unknown           |

|                |                |                   |
|----------------|----------------|-------------------|
| Firmicutes     | Bacilli        | Lactobacillales   |
| Firmicutes     | Bacilli        | Bacillales        |
| Firmicutes     | Bacilli        | Bacillales        |
| Firmicutes     | Bacilli        | Bacillales        |
| Unknown        | Unknown        | Unknown           |
| Firmicutes     | Bacilli        | Bacillales        |
| Actinobacteria | Actinobacteria | Corynebacteriales |
| Firmicutes     | Bacilli        | Bacillales        |
| Unknown        | Unknown        | Unknown           |
| Unknown        | Unknown        | Unknown           |
| Firmicutes     | Bacilli        | Bacillales        |
| Unknown        | Unknown        | Unknown           |
| Unknown        | Unknown        | Unknown           |
| Firmicutes     | Bacilli        | Bacillales        |

|                     |                     |                  |
|---------------------|---------------------|------------------|
| Unknown             | Unknown             | Unknown          |
| Unknown             | Unknown             | Unknown          |
| Unknown             | Unknown             | Unknown          |
| Firmicutes          | Bacilli             | Bacillales       |
| Actinobacteria      | Actinobacteria      | Micrococcales    |
| Bacteroidetes       | Flavobacteriia      | Flavobacteriales |
| Bacteroidetes       | Flavobacteriia      | Flavobacteriales |
| Firmicutes          | Clostridia          | Clostridiales    |
| Unknown             | Unknown             | Unknown          |
| Bacteroidetes       | Bacteroidia         | Bacteroidales    |
| Bacteroidetes       | Flavobacteriia      | Flavobacteriales |
| Firmicutes          | Bacilli             | Bacillales       |
| Deinococcus-Thermus | Deinococci          | Thermales        |
| Deinococcus-Thermus | Deinococci          | Thermales        |
| Deinococcus-Thermus | Deinococci          | Thermales        |
| Actinobacteria      | Coriobacteriia      | Eggerthellales   |
| Firmicutes          | Bacilli             | Lactobacillales  |
| Proteobacteria      | Gammaproteobacteria | Pseudomonadales  |
| Proteobacteria      | Gammaproteobacteria | Pseudomonadales  |
| Proteobacteria      | Gammaproteobacteria | Vibrionales      |
| Proteobacteria      | Gammaproteobacteria | Vibrionales      |
| Proteobacteria      | Gammaproteobacteria | Vibrionales      |

|                |                     |                  |
|----------------|---------------------|------------------|
| Proteobacteria | Gammaproteobacteria | Vibrionales      |
| Proteobacteria | Gammaproteobacteria | Vibrionales      |
| Cyanobacteria  | Cyanophyceae        | Synechococcales  |
| Proteobacteria | Gammaproteobacteria | Pseudomonadales  |
| Unknown        | Unknown             | Unknown          |
| Proteobacteria | Gammaproteobacteria | Enterobacterales |
| Unknown        | Unknown             | Unknown          |
| Actinobacteria | Actinobacteria      | Streptomycetales |
| Actinobacteria | Actinobacteria      | Micrococcales    |
| Actinobacteria | Actinobacteria      | Streptomycetales |
| Proteobacteria | Gammaproteobacteria | Pasteurellales   |
| Unknown        | Unknown             | Unknown          |
| Proteobacteria | Betaproteobacteria  | Burkholderiales  |
| Proteobacteria | Gammaproteobacteria | Pseudomonadales  |
| Proteobacteria | Gammaproteobacteria | Pseudomonadales  |
| Proteobacteria | Alphaproteobacteria | Rhizobiales      |

|                |                       |                   |
|----------------|-----------------------|-------------------|
| Proteobacteria | Alphaproteobacteria   | Rhizobiales       |
| Proteobacteria | Alphaproteobacteria   | Rhizobiales       |
| Proteobacteria | Gammaproteobacteria   | Enterobacterales  |
| Proteobacteria | Gammaproteobacteria   | Enterobacterales  |
| Proteobacteria | Gammaproteobacteria   | Enterobacterales  |
| Proteobacteria | Alphaproteobacteria   | Rhizobiales       |
| Proteobacteria | Alphaproteobacteria   | Rhizobiales       |
| Proteobacteria | Alphaproteobacteria   | Pelagibacterales  |
| Proteobacteria | Alphaproteobacteria   | Rhodobacterales   |
| Proteobacteria | Alphaproteobacteria   | Rhodobacterales   |
| Proteobacteria | Alphaproteobacteria   | Rhodobacterales   |
| Unknown        | Unknown               | Unknown           |
| Proteobacteria | Epsilonproteobacteria | Unknown           |
| Unknown        | Unknown               | Unknown           |
| Proteobacteria | Gammaproteobacteria   | Vibrionales       |
| Proteobacteria | Gammaproteobacteria   | Vibrionales       |
| Cyanobacteria  | Cyanophyceae          | Oscillatoriales   |
| Unknown        | Unknown               | Unknown           |
| Proteobacteria | Alphaproteobacteria   | Rhizobiales       |
| Proteobacteria | Alphaproteobacteria   | Rhizobiales       |
| Proteobacteria | Alphaproteobacteria   | Rhizobiales       |
| Firmicutes     | Bacilli               | Lactobacillales   |
| Unknown        | Unknown               | Unknown           |
| Firmicutes     | Clostridia            | Clostridiales     |
| Firmicutes     | Clostridia            | Clostridiales     |
| Proteobacteria | Gammaproteobacteria   | Aeromonadales     |
| Proteobacteria | Gammaproteobacteria   | Aeromonadales     |
| Proteobacteria | Gammaproteobacteria   | Aeromonadales     |
| Proteobacteria | Gammaproteobacteria   | Vibrionales       |
| Unknown        | Unknown               | Unknown           |
| Unknown        | Unknown               | Unknown           |
| Unknown        | Unknown               | Unknown           |
| Firmicutes     | Clostridia            | Clostridiales     |
| Firmicutes     | Clostridia            | Clostridiales     |
| Bacteroidetes  | Flavobacteriia        | Flavobacteriales  |
| Proteobacteria | Gammaproteobacteria   | Oceanospirillales |
| Proteobacteria | Betaproteobacteria    | Burkholderiales   |
| Proteobacteria | Betaproteobacteria    | Burkholderiales   |
| Proteobacteria | Betaproteobacteria    | Burkholderiales   |

|                |                     |                  |
|----------------|---------------------|------------------|
| Proteobacteria | Betaproteobacteria  | Burkholderiales  |
| Proteobacteria | Gammaproteobacteria | Pseudomonadales  |
| Proteobacteria | Betaproteobacteria  | Burkholderiales  |
| Proteobacteria | Betaproteobacteria  | Burkholderiales  |
| Unknown        | Unknown             | Unknown          |
| Unknown        | Unknown             | Unknown          |
| Bacteroidetes  | Bacteroidia         | Bacteroidales    |
| Unknown        | Unknown             | Unknown          |
| Proteobacteria | Betaproteobacteria  | Burkholderiales  |
| Proteobacteria | Alphaproteobacteria | Caulobacterales  |
| Proteobacteria | Alphaproteobacteria | Pelagibacterales |
| Unknown        | Unknown             | Unknown          |
| Proteobacteria | Alphaproteobacteria | Rhodobacterales  |
| Proteobacteria | Alphaproteobacteria | Rhodobacterales  |
| Proteobacteria | Gammaproteobacteria | Vibrionales      |
| Proteobacteria | Gammaproteobacteria | Alteromonadales  |
| Proteobacteria | Gammaproteobacteria | Vibrionales      |
| Proteobacteria | Gammaproteobacteria | Alteromonadales  |
| Cyanobacteria  | Cyanophyceae        | Chroococcales    |
| Proteobacteria | Gammaproteobacteria | Vibrionales      |
| Proteobacteria | Gammaproteobacteria | Alteromonadales  |
| Proteobacteria | Gammaproteobacteria | Alteromonadales  |
| Cyanobacteria  | Cyanophyceae        | Chroococcales    |
| Bacteroidetes  | Flavobacteriia      | Flavobacteriales |
| Unknown        | Unknown             | Unknown          |
| Firmicutes     | Bacilli             | Lactobacillales  |
| Unknown        | Unknown             | Unknown          |
| Unknown        | Unknown             | Unknown          |
| Firmicutes     | Bacilli             | Lactobacillales  |
| Firmicutes     | Bacilli             | Bacillales       |
| Firmicutes     | Bacilli             | Lactobacillales  |

|                     |                     |                  |
|---------------------|---------------------|------------------|
| Firmicutes          | Bacilli             | Lactobacillales  |
| Actinobacteria      | Actinobacteria      | Micrococcales    |
| Firmicutes          | Bacilli             | Lactobacillales  |
| Firmicutes          | Bacilli             | Bacillales       |
| Unknown             | Unknown             | Unknown          |
| Firmicutes          | Bacilli             | Bacillales       |
| Proteobacteria      | Gammaproteobacteria | Enterobacterales |
| Proteobacteria      | Betaproteobacteria  | Burkholderiales  |
| Proteobacteria      | Gammaproteobacteria | Pseudomonadales  |
| Proteobacteria      | Gammaproteobacteria | Vibrionales      |
| Proteobacteria      | Gammaproteobacteria | Pseudomonadales  |
| Proteobacteria      | Gammaproteobacteria | Enterobacterales |
| Proteobacteria      | Gammaproteobacteria | Enterobacterales |
| Deinococcus-Thermus | Deinococci          | Thermales        |

[illegible]

[illegible]

|                |                     |                  |
|----------------|---------------------|------------------|
| Actinobacteria | Actinobacteria      | Streptomycetales |
| Actinobacteria | Actinobacteria      | Streptomycetales |
| Actinobacteria | Actinobacteria      | Streptomycetales |
| Proteobacteria | Gammaproteobacteria | Xanthomonadales  |
| Proteobacteria | Gammaproteobacteria | Pseudomonadales  |
| Proteobacteria | Gammaproteobacteria | Pseudomonadales  |
| Actinobacteria | Actinobacteria      | Micrococcales    |
| Actinobacteria | Actinobacteria      | Micrococcales    |
| Actinobacteria | Actinobacteria      | Micrococcales    |
| Firmicutes     | Bacilli             | Lactobacillales  |
| Firmicutes     | Bacilli             | Lactobacillales  |
| Firmicutes     | Bacilli             | Bacillales       |
| Firmicutes     | Bacilli             | Bacillales       |
| Firmicutes     | Bacilli             | Bacillales       |
| Firmicutes     | Clostridia          | Clostridiales    |
| Bacteroidetes  | Flavobacteriia      | Flavobacteriales |
| Firmicutes     | Clostridia          | Clostridiales    |
| Firmicutes     | Bacilli             | Bacillales       |
| Firmicutes     | Bacilli             | Bacillales       |
| Unknown        | Unknown             | Unknown          |
| Unknown        | Unknown             | Unknown          |
| Unknown        | Unknown             | Unknown          |
| Firmicutes     | Bacilli             | Bacillales       |
| Unknown        | Unknown             | Unknown          |
| Unknown        | Unknown             | Unknown          |
| Firmicutes     | Bacilli             | Bacillales       |
| Unknown        | Unknown             | Unknown          |
| Firmicutes     | Bacilli             | Bacillales       |
| Bacteroidetes  | Flavobacteriia      | Flavobacteriales |
| Firmicutes     | Bacilli             | Bacillales       |
| Proteobacteria | Gammaproteobacteria | Vibrionales      |
| Proteobacteria | Gammaproteobacteria | Vibrionales      |
| Proteobacteria | Gammaproteobacteria | Vibrionales      |
| Firmicutes     | Bacilli             | Bacillales       |
| Unknown        | Unknown             | Unknown          |
| Firmicutes     | Bacilli             | Bacillales       |

[illegible]

|                             |                     |                     |
|-----------------------------|---------------------|---------------------|
| Actinobacteria              | Actinobacteria      | Corynebacteriales   |
| Cyanobacteria               | Cyanophyceae        | Synechococcales     |
| Proteobacteria              | Gammaproteobacteria | Alteromonadales     |
| Proteobacteria              | Gammaproteobacteria | Vibrionales         |
| Proteobacteria              | Gammaproteobacteria | Vibrionales         |
| Proteobacteria              | Gammaproteobacteria | Vibrionales         |
| Firmicutes                  | Bacilli             | Lactobacillales     |
| Firmicutes                  | Bacilli             | Lactobacillales     |
| Actinobacteria              | Actinobacteria      | Micrococcales       |
| Actinobacteria              | Actinobacteria      | Streptomycetales    |
| Actinobacteria              | Actinobacteria      | Streptomycetales    |
| Firmicutes                  | Bacilli             | Lactobacillales     |
| Firmicutes                  | Bacilli             | Lactobacillales     |
| Firmicutes                  | Bacilli             | Lactobacillales     |
| Firmicutes                  | Clostridia          | Clostridiales       |
| Unknown                     | Unknown             | Unknown             |
| Unknown                     | Unknown             | Unknown             |
| Unknown                     | Unknown             | Unknown             |
| Candidatus Saccharibacteria | Unknown             | Unknown             |
| Unknown                     | Unknown             | Unknown             |
| Actinobacteria              | Actinobacteria      | Micrococcales       |
| Actinobacteria              | Actinobacteria      | Propionibacteriales |
| Actinobacteria              | Actinobacteria      | Propionibacteriales |
| Actinobacteria              | Actinobacteria      | Propionibacteriales |
| Actinobacteria              | Actinobacteria      | Corynebacteriales   |
| Proteobacteria              | Gammaproteobacteria | Pasteurellales      |
| Actinobacteria              | Actinobacteria      | Corynebacteriales   |
| Actinobacteria              | Actinobacteria      | Corynebacteriales   |
| Actinobacteria              | Actinobacteria      | Corynebacteriales   |
| Firmicutes                  | Bacilli             | Lactobacillales     |
| Firmicutes                  | Erysipelotrichia    | Erysipelotrichales  |

|                |                |                        |
|----------------|----------------|------------------------|
| Firmicutes     | Bacilli        | Lactobacillales        |
| Firmicutes     | Bacilli        | Lactobacillales        |
| Firmicutes     | Bacilli        | Lactobacillales        |
| Actinobacteria | Actinobacteria | Propionibacteriales    |
| Actinobacteria | Actinobacteria | Propionibacteriales    |
| Actinobacteria | Actinobacteria | Propionibacteriales    |
| Actinobacteria | Actinobacteria | Micrococcales          |
| Actinobacteria | Actinobacteria | Micrococcales          |
| Firmicutes     | Clostridia     | Thermoanaerobacterales |
| Firmicutes     | Bacilli        | Lactobacillales        |
| Firmicutes     | Bacilli        | Bacillales             |
| Firmicutes     | Clostridia     | Clostridiales          |
| Firmicutes     | Clostridia     | Clostridiales          |
| Firmicutes     | Bacilli        | Lactobacillales        |
| Actinobacteria | Actinobacteria | Micrococcales          |
| Firmicutes     | Bacilli        | Lactobacillales        |
| Firmicutes     | Bacilli        | Lactobacillales        |
| Firmicutes     | Clostridia     | Clostridiales          |
| Firmicutes     | Clostridia     | Clostridiales          |
| Firmicutes     | Bacilli        | Bacillales             |
| Firmicutes     | Bacilli        | Bacillales             |
| Firmicutes     | Bacilli        | Bacillales             |
| Unknown        | Unknown        | Unknown                |
| Unknown        | Unknown        | Unknown                |
| Actinobacteria | Actinobacteria | Micrococcales          |
| Cyanobacteria  | Cyanophyceae   | Chroococcales          |
| Firmicutes     | Bacilli        | Bacillales             |
| Firmicutes     | Bacilli        | Bacillales             |
| Unknown        | Unknown        | Unknown                |
| Cyanobacteria  | Cyanophyceae   | Oscillatoriales        |
| Actinobacteria | Actinobacteria | Micrococcales          |
| Actinobacteria | Actinobacteria | Corynebacteriales      |
| Actinobacteria | Actinobacteria | Micrococcales          |

|                     |                     |                     |
|---------------------|---------------------|---------------------|
| Actinobacteria      | Actinobacteria      | Micrococcales       |
| Proteobacteria      | Gammaproteobacteria | Xanthomonadales     |
| Deinococcus-Thermus | Deinococci          | Thermales           |
| Deinococcus-Thermus | Deinococci          | Thermales           |
| Deinococcus-Thermus | Deinococci          | Thermales           |
| Firmicutes          | Bacilli             | Lactobacillales     |
| Proteobacteria      | Alphaproteobacteria | Rhizobiales         |
| Proteobacteria      | Alphaproteobacteria | Rhizobiales         |
| Proteobacteria      | Gammaproteobacteria | Enterobacterales    |
| Proteobacteria      | Gammaproteobacteria | Vibrionales         |
| Proteobacteria      | Gammaproteobacteria | Enterobacterales    |
| Proteobacteria      | Gammaproteobacteria | Enterobacterales    |
| Proteobacteria      | Gammaproteobacteria | Enterobacterales    |
| Actinobacteria      | Actinobacteria      | Micrococcales       |
| Actinobacteria      | Actinobacteria      | Streptosporangiales |
| Actinobacteria      | Actinobacteria      | Streptosporangiales |
| Firmicutes          | Bacilli             | Bacillales          |
| Proteobacteria      | Alphaproteobacteria | Rhodobacterales     |
| Proteobacteria      | Alphaproteobacteria | Sphingomonadales    |
| Proteobacteria      | Alphaproteobacteria | Rhodobacterales     |
| Proteobacteria      | Alphaproteobacteria | Rhodobacterales     |

|                |                     |                  |
|----------------|---------------------|------------------|
| Proteobacteria | Alphaproteobacteria | Rhodobacterales  |
| Proteobacteria | Alphaproteobacteria | Rhodobacterales  |
| Proteobacteria | Alphaproteobacteria | Rhodobacterales  |
| Proteobacteria | Gammaproteobacteria | Vibrionales      |
| Proteobacteria | Gammaproteobacteria | Alteromonadales  |
| Proteobacteria | Gammaproteobacteria | Vibrionales      |
| Proteobacteria | Gammaproteobacteria | Vibrionales      |
| Proteobacteria | Gammaproteobacteria | Alteromonadales  |
| Proteobacteria | Gammaproteobacteria | Vibrionales      |
| Proteobacteria | Gammaproteobacteria | Pseudomonadales  |
| Bacteroidetes  | Flavobacteriia      | Flavobacteriales |
| Proteobacteria | Gammaproteobacteria | Pseudomonadales  |
| Unknown        | Unknown             | Unknown          |
| Actinobacteria | Actinobacteria      | Micrococcales    |
| Firmicutes     | Bacilli             | Bacillales       |
| Firmicutes     | Bacilli             | Bacillales       |
| Unknown        | Unknown             | Unknown          |
| Firmicutes     | Bacilli             | Bacillales       |
| Actinobacteria | Actinobacteria      | Micrococcales    |
| Unknown        | Unknown             | Unknown          |
| Unknown        | Unknown             | Unknown          |
| Cyanobacteria  | Cyanophyceae        | Synechococcales  |
| Cyanobacteria  | Cyanophyceae        | Synechococcales  |
| Unknown        | Unknown             | Unknown          |
| Actinobacteria | Actinobacteria      | Streptomycetales |
| Actinobacteria | Actinobacteria      | Streptomycetales |
| Actinobacteria | Actinobacteria      | Streptomycetales |
| Unknown        | Unknown             | Unknown          |
| Cyanobacteria  | Cyanophyceae        | Synechococcales  |
| Cyanobacteria  | Cyanophyceae        | Synechococcales  |
| Firmicutes     | Bacilli             | Lactobacillales  |
| Unknown        | Unknown             | Unknown          |
| Bacteroidetes  | Flavobacteriia      | Flavobacteriales |
| Cyanobacteria  | Cyanophyceae        | Synechococcales  |
| Cyanobacteria  | Cyanophyceae        | Synechococcales  |
| Cyanobacteria  | Cyanophyceae        | Synechococcales  |
| Firmicutes     | Bacilli             | Bacillales       |
| Actinobacteria | Actinobacteria      | Micrococcales    |
| Firmicutes     | Clostridia          | Clostridiales    |

|                     |                     |                   |
|---------------------|---------------------|-------------------|
| Actinobacteria      | Actinobacteria      | Streptomycetales  |
| Proteobacteria      | Alphaproteobacteria | Rhodobacterales   |
| Unknown             | Unknown             | Unknown           |
| Proteobacteria      | Gammaproteobacteria | Pseudomonadales   |
| Proteobacteria      | Gammaproteobacteria | Pseudomonadales   |
| Actinobacteria      | Actinobacteria      | Micrococcales     |
| Proteobacteria      | Gammaproteobacteria | Xanthomonadales   |
| Proteobacteria      | Gammaproteobacteria | Pseudomonadales   |
| Proteobacteria      | Gammaproteobacteria | Pseudomonadales   |
| Actinobacteria      | Actinobacteria      | Actinomycetales   |
| Actinobacteria      | Actinobacteria      | Bifidobacteriales |
| Proteobacteria      | Gammaproteobacteria | Enterobacterales  |
| Deinococcus-Thermus | Deinococci          | Thermales         |
| Deinococcus-Thermus | Deinococci          | Thermales         |
| Firmicutes          | Bacilli             | Lactobacillales   |
| Firmicutes          | Bacilli             | Bacillales        |
| Proteobacteria      | Betaproteobacteria  | Burkholderiales   |
| Unknown             | Unknown             | Unknown           |
| Unknown             | Unknown             | Unknown           |
| Unknown             | Unknown             | Unknown           |
| Proteobacteria      | Gammaproteobacteria | Xanthomonadales   |
| Actinobacteria      | Actinobacteria      | Micrococcales     |
| Proteobacteria      | Alphaproteobacteria | Sphingomonadales  |
| Firmicutes          | Bacilli             | Lactobacillales   |
| Firmicutes          | Bacilli             | Bacillales        |
| Unknown             | Unknown             | Unknown           |
| Firmicutes          | Clostridia          | Clostridiales     |
| Unknown             | Unknown             | Unknown           |
| Unknown             | Unknown             | Unknown           |
| Unknown             | Unknown             | Unknown           |
| Firmicutes          | Clostridia          | Clostridiales     |
| Unknown             | Unknown             | Unknown           |
| Unknown             | Unknown             | Unknown           |
| Firmicutes          | Bacilli             | Bacillales        |
| Unknown             | Unknown             | Unknown           |
| Actinobacteria      | Actinobacteria      | Micrococcales     |
| Actinobacteria      | Actinobacteria      | Micrococcales     |
| Firmicutes          | Bacilli             | Lactobacillales   |
| Firmicutes          | Bacilli             | Lactobacillales   |
| Firmicutes          | Bacilli             | Lactobacillales   |

Mycobacteriaceae  
Gordoniaceae  
Gordoniaceae  
Gordoniaceae  
Gordoniaceae  
Gordoniaceae  
Unknown  
Gordoniaceae  
Gordoniaceae  
Gordoniaceae  
Gordoniaceae  
Gordoniaceae  
Gordoniaceae  
Tsukamurellaceae  
Gordoniaceae  
Gordoniaceae  
Gordoniaceae

Mycolicibacterium  
 Mycobacterium  
 Mycolicibacterium  
 Gordonia  
 Gordonia  
 Gordonia  
 Gordonia  
 Gordonia  
 Unknown  
 Gordonia  
 Gordonia  
 Gordonia  
 Gordonia  
 Gordonia  
 Gordonia  
 Tsukamurella  
 Gordonia  
 Gordonia  
 Gordonia



|                  |                   |
|------------------|-------------------|
| Mycobacteriaceae | Mycolicibacterium |
| Mycobacteriaceae | Mycobacterium     |
| Mycobacteriaceae | Mycobacterium     |
| Mycobacteriaceae | Mycolicibacterium |
| Micrococcaceae   | Arthrobacter      |
| Gordoniaceae     | Gordonia          |
| Nocardiaceae     | Rhodococcus       |
| Gordoniaceae     | Gordonia          |
| Gordoniaceae     | Gordonia          |
| Gordoniaceae     | Gordonia          |
| Unknown          | Unknown           |
| Nocardiaceae     | Rhodococcus       |
| Nocardiaceae     | Rhodococcus       |
| Mycobacteriaceae | Mycolicibacterium |
| Mycobacteriaceae | Mycobacterium     |
| Mycobacteriaceae | Mycobacterium     |
| Gordoniaceae     | Gordonia          |
| Gordoniaceae     | Gordonia          |
| Gordoniaceae     | Gordonia          |



|                    |                |
|--------------------|----------------|
| Xanthomonadaceae   | Xanthomonas    |
| Xanthomonadaceae   | Xanthomonas    |
| Aeromonadaceae     | Aeromonas      |
| Erwiniaceae        | Pantoea        |
| Enterobacteriaceae | Salmonella     |
| Enterobacteriaceae | Salmonella     |
| Morganellaceae     | Proteus        |
| Enterobacteriaceae | Raoultella     |
| Enterobacteriaceae | Cronobacter    |
| Enterobacteriaceae | Escherichia    |
| Pseudomonadaceae   | Pseudomonas    |
| Pseudomonadaceae   | Pseudomonas    |
| Pseudomonadaceae   | Pseudomonas    |
| Unknown            | Unknown        |
| Pseudomonadaceae   | Pseudomonas    |
| Unknown            | Unknown        |
| Microcystaceae     | Microcystis    |
| Microcystaceae     | Microcystis    |
| Brucellaceae       | Ochrobactrum   |
| Sphingomonadaceae  | Sphingomonas   |
| Unknown            | Unknown        |
| Unknown            | Unknown        |
| Unknown            | Unknown        |
| Flavobacteriaceae  | Flavobacterium |
| Alcaligenaceae     | Achromobacter  |
| Enterobacteriaceae | Enterobacter   |
| Enterobacteriaceae | Escherichia    |
| Enterobacteriaceae | Escherichia    |
| Enterobacteriaceae | Escherichia    |
| Enterobacteriaceae | Salmonella     |
| Enterobacteriaceae | Salmonella     |
| Enterobacteriaceae | Cronobacter    |
| Enterobacteriaceae | Escherichia    |
| Enterobacteriaceae | Klebsiella     |
| Enterobacteriaceae | Escherichia    |
| Aeromonadaceae     | Aeromonas      |
| Enterobacteriaceae | Salmonella     |
| Enterobacteriaceae | Salmonella     |
| Erwiniaceae        | Pantoea        |
| Unknown            | Unknown        |
| Enterobacteriaceae | Escherichia    |



|                    |                   |
|--------------------|-------------------|
| Gordoniaceae       | Gordonia          |
| Mycobacteriaceae   | Mycolicibacterium |
| Unknown            | Unknown           |
| Mycobacteriaceae   | Mycolicibacterium |
| Mycobacteriaceae   | Mycolicibacterium |
| Corynebacteriaceae | Corynebacterium   |
| Gordoniaceae       | Gordonia          |
| Nocardiaceae       | Rhodococcus       |
| Gordoniaceae       | Gordonia          |
| Mycobacteriaceae   | Mycolicibacterium |
| Mycobacteriaceae   | Mycolicibacterium |
| Listeriaceae       | Listeria          |
| Unknown            | Unknown           |
| Listeriaceae       | Listeria          |
| Lactobacillaceae   | Lactobacillus     |
| Lactobacillaceae   | Lactobacillus     |

|                  |               |
|------------------|---------------|
| Lactobacillaceae | Lactobacillus |
| Streptococcaceae | Lactococcus   |
| Enterococcaceae  | Enterococcus  |
| Unknown          | Unknown       |
| Unknown          | Unknown       |
| Enterococcaceae  | Enterococcus  |
| Streptococcaceae | Streptococcus |
| Enterococcaceae  | Enterococcus  |
| Enterococcaceae  | Enterococcus  |

|                        |                         |
|------------------------|-------------------------|
| Enterococcaceae        | Enterococcus            |
| Aeromonadaceae         | Aeromonas               |
| Vibrionaceae           | Vibrio                  |
| Enterobacteriaceae     | Escherichia             |
| Pseudomonadaceae       | Pseudomonas             |
| Pelagibacteraceae      | Candidatus Pelagibacter |
| Pelagibacteraceae      | Candidatus Pelagibacter |
| Pelagibacteraceae      | Candidatus Pelagibacter |
| Pseudoalteromonadaceae | Pseudoalteromonas       |
| Alteromonadaceae       | Marinobacter            |
| Pseudoalteromonadaceae | Pseudoalteromonas       |
| Pseudoalteromonadaceae | Pseudoalteromonas       |
| Pelagibacteraceae      | Candidatus Pelagibacter |

Pelagibacteraceae  
 Enterobacteriaceae  
 Erwiniaceae  
 Colwelliaceae  
 Unknown  
 Unknown  
 Unknown  
 Xanthomonadaceae  
 Aeromonadaceae  
 Aeromonadaceae  
 Aeromonadaceae  
 Vibrionaceae  
 Vibrionaceae  
 Gordoniaceae  
 Unknown  
 Unknown  
 Bacillaceae  
 Bacillaceae  
 Bacillaceae  
 Bacillaceae  
 Bacillaceae  
 Bacillaceae  
 Bacillaceae

[illegible]

[illegible][illegible]

Streptomycetaceae  
Enterococcaceae  
Enterococcaceae  
Enterococcaceae  
Enterococcaceae  
Enterococcaceae  
Enterococcaceae  
Unknown  
Enterococcaceae  
Enterococcaceae  
Enterococcaceae  
Enterococcaceae  
Enterococcaceae  
Enterococcaceae  
Enterococcaceae  
Enterococcaceae  
Enterococcaceae  
Unknown  
Enterococcaceae  
Unknown  
Enterococcaceae  
Enterococcaceae

Streptomyces  
Enterococcus  
Enterococcus  
Enterococcus  
Enterococcus  
Enterococcus  
Enterococcus  
Unknown  
Enterococcus  
Enterococcus  
Enterococcus  
Enterococcus  
Enterococcus  
Enterococcus  
Enterococcus  
Enterococcus  
Enterococcus  
Unknown  
Enterococcus  
Unknown  
Enterococcus  
Enterococcus

|                  |               |
|------------------|---------------|
| Enterococcaceae  | Enterococcus  |
| Unknown          | Unknown       |
| Streptococcaceae | Lactococcus   |
| Leuconostocaceae | Leuconostoc   |
| Streptococcaceae | Streptococcus |
| Streptococcaceae | Streptococcus |
| Lactobacillaceae | Lactobacillus |
| Bacillaceae      | Bacillus      |
| Bacillaceae      | Virgibacillus |
| Bacillaceae      | Bacillus      |
| Unknown          | Unknown       |
| Bacillaceae      | Bacillus      |
| Bacillaceae      | Bacillus      |
| Unknown          | Unknown       |
| Bacillaceae      | Bacillus      |
| Bacillaceae      | Bacillus      |

|                   |                |
|-------------------|----------------|
| Bacillaceae       | Bacillus       |
| Unknown           | Unknown        |
| Bacillaceae       | Bacillus       |
| Unknown           | Unknown        |
| Bacillaceae       | Bacillus       |
| Streptococcaceae  | Lactococcus    |
| Enterococcaceae   | Enterococcus   |
| Enterococcaceae   | Enterococcus   |
| Listeriaceae      | Brochothrix    |
| Listeriaceae      | Brochothrix    |
| Enterococcaceae   | Enterococcus   |
| Enterococcaceae   | Enterococcus   |
| Enterococcaceae   | Enterococcus   |
| Streptococcaceae  | Streptococcus  |
| Listeriaceae      | Brochothrix    |
| Enterococcaceae   | Enterococcus   |
| Enterococcaceae   | Enterococcus   |
| Staphylococcaceae | Staphylococcus |
| Alcaligenaceae    | Bordetella     |
| Alcaligenaceae    | Bordetella     |
| Alcaligenaceae    | Bordetella     |

Alcaligenaceae  
Alcaligenaceae  
Pseudomonadaceae  
Pseudomonadaceae  
Pseudomonadaceae  
Pseudomonadaceae  
Pseudomonadaceae  
Pseudomonadaceae  
Pseudomonadaceae  
Unknown  
Yersiniaceae  
Alcaligenaceae  
Streptococcaceae  
Microbacteriaceae  
Micrococcaceae  
Micrococcaceae  
Micrococcaceae  
Micrococcaceae  
Micrococcaceae  
Micrococcaceae

Bordetella  
Bordetella  
Pseudomonas  
Pseudomonas  
Pseudomonas  
Pseudomonas  
Pseudomonas  
Pseudomonas  
Pseudomonas  
Unknown  
Yersinia  
Bordetella  
Streptococcus  
Microbacterium  
Microbacterium  
Microbacterium  
Microbacterium  
Microbacterium  
Microbacterium  
Microbacterium  
Microbacterium  
Microbacterium  
Arthrobacter  
Arthrobacter  
Arthrobacter  
Arthrobacter  
Arthrobacter  
Arthrobacter

[illegible]

|                      |                   |
|----------------------|-------------------|
| Caulobacteraceae     | Caulobacter       |
| Pectobacteriaceae    | Pectobacterium    |
| Pectobacteriaceae    | Pectobacterium    |
| Enterobacteriaceae   | Cronobacter       |
| Enterobacteriaceae   | Cronobacter       |
| Aeromonadaceae       | Aeromonas         |
| Enterobacteriaceae   | Salmonella        |
| Yersiniaceae         | Yersinia          |
| Aeromonadaceae       | Aeromonas         |
| Aeromonadaceae       | Aeromonas         |
| Vibrionaceae         | Vibrio            |
| Vibrionaceae         | Vibrio            |
| Vibrionaceae         | Vibrio            |
| Pectobacteriaceae    | Dickeya           |
| Enterobacteriaceae   | Cronobacter       |
| Pasteurellaceae      | Pasteurella       |
| Enterobacteriaceae   | Klebsiella        |
| Enterobacteriaceae   | Klebsiella        |
| Enterobacteriaceae   | Klebsiella        |
| Enterobacteriaceae   | Enterobacter      |
| Enterobacteriaceae   | Salmonella        |
| Enterobacteriaceae   | Salmonella        |
| Unknown              | Unknown           |
| Enterobacteriaceae   | Salmonella        |
| Enterobacteriaceae   | Escherichia       |
| Enterobacteriaceae   | Unknown           |
| Enterobacteriaceae   | Escherichia       |
| Pasteurellaceae      | Haemophilus       |
| Pasteurellaceae      | Haemophilus       |
| Pasteurellaceae      | Pasteurella       |
| Pasteurellaceae      | Mannheimia        |
| Pasteurellaceae      | Mannheimia        |
| Pasteurellaceae      | Mannheimia        |
| Bacillaceae          | Bacillus          |
| Bacillaceae          | Bacillus          |
| Bacillaceae          | Bacillus          |
| Aphanizomenonaceae   | Nodularia         |
| Aphanizomenonaceae   | Nodularia         |
| Aphanizomenonaceae   | Nodularia         |
| Acidithiobacillaceae | Acidithiobacillus |

|                    |                |
|--------------------|----------------|
| Unknown            | Unknown        |
| Synechococcaceae   | Synechococcus  |
| Erwiniaceae        | Erwinia        |
| Erwiniaceae        | Erwinia        |
| Enterobacteriaceae | Escherichia    |
| Enterobacteriaceae | Escherichia    |
| Unknown            | Unknown        |
| Unknown            | Unknown        |
| Rhizobiaceae       | Rhizobium      |
| Pseudomonadaceae   | Pseudomonas    |
| Unknown            | Unknown        |
| Xanthomonadaceae   | Xanthomonas    |
| Burkholderiaceae   | Burkholderia   |
| Synechococcaceae   | Synechococcus  |
| Synechococcaceae   | Synechococcus  |
| Unknown            | Unknown        |
| Rhodobacteraceae   | Rhodobacter    |
| Rhodobacteraceae   | Rhodovulum     |
| Synechococcaceae   | Synechococcus  |
| Alcaligenaceae     | Achromobacter  |
| Alcaligenaceae     | Achromobacter  |
| Alcaligenaceae     | Achromobacter  |
| Pseudomonadaceae   | Pseudomonas    |
| Synechococcaceae   | Synechococcus  |
| Staphylococcaceae  | Staphylococcus |

|                   |                |
|-------------------|----------------|
| Staphylococcaceae | Staphylococcus |
| Unknown           | Unknown        |
| Staphylococcaceae | Staphylococcus |
| Streptomyetaceae  | Streptomyces   |
| Bacillaceae       | Bacillus       |
| Listeriaceae      | Listeria       |
| Listeriaceae      | Listeria       |
| Listeriaceae      | Listeria       |

|                       |                  |
|-----------------------|------------------|
| Listeriaceae          | Listeria         |
| Unknown               | Unknown          |
| Listeriaceae          | Listeria         |
| Listeriaceae          | Listeria         |
| Listeriaceae          | Listeria         |
| Bacillaceae           | Bacillus         |
| Bacillaceae           | Bacillus         |
| Peptostreptococcaceae | Clostridioides   |
| Clostridiaceae        | Clostridium      |
| Peptostreptococcaceae | Clostridioides   |
| Clostridiaceae        | Clostridium      |
| Peptostreptococcaceae | Clostridioides   |
| Peptostreptococcaceae | Clostridioides   |
| Clostridiaceae        | Clostridium      |
| Clostridiaceae        | Clostridium      |
| Clostridiaceae        | Clostridium      |
| Peptostreptococcaceae | Clostridioides   |
| Clostridiaceae        | Clostridium      |
| Unknown               | Unknown          |
| Erwiniaceae           | Pantoea          |
| Enterobacteriaceae    | Klebsiella       |
| Enterobacteriaceae    | Escherichia      |
| Enterobacteriaceae    | Cronobacter      |
| Xanthomonadaceae      | Stenotrophomonas |
| Aeromonadaceae        | Aeromonas        |
| Enterobacteriaceae    | Escherichia      |

|                    |               |
|--------------------|---------------|
| Enterobacteriaceae | Escherichia   |
| Enterobacteriaceae | Shigella      |
| Enterobacteriaceae | Escherichia   |
| Enterobacteriaceae | Cronobacter   |
| Moraxellaceae      | Acinetobacter |
| Unknown            | Unknown       |
| Moraxellaceae      | Acinetobacter |
| Moraxellaceae      | Acinetobacter |
| Rhizobiaceae       | Sinorhizobium |
| Rhizobiaceae       | Sinorhizobium |
| Rhizobiaceae       | Rhizobium     |
| Rhizobiaceae       | Sinorhizobium |
| Acaryochloridaceae | Acaryochloris |
| Acaryochloridaceae | Acaryochloris |
| Rhodobacteraceae   | Ruegeria      |
| Rhodobacteraceae   | Ruegeria      |
| Rhizobiaceae       | Rhizobium     |
| Unknown            | Unknown       |
| Unknown            | Unknown       |
| Rhizobiaceae       | Agrobacterium |
| Bacillaceae        | Bacillus      |
| Bacillaceae        | Bacillus      |
| Bacillaceae        | Bacillus      |
| Unknown            | Unknown       |
| Bacillaceae        | Bacillus      |
| Bacillaceae        | Bacillus      |

|                   |              |
|-------------------|--------------|
| Bacillaceae       | Bacillus     |
| Unknown           | Unknown      |
| Bacillaceae       | Bacillus     |
| Bacillaceae       | Bacillus     |
| Streptomycetaceae | Streptomyces |
| Micrococcaceae    | Arthrobacter |
| Pseudomonadaceae  | Pseudomonas  |

|                    |                   |
|--------------------|-------------------|
| Pseudomonadaceae   | Pseudomonas       |
| Pseudomonadaceae   | Pseudomonas       |
| Pseudomonadaceae   | Pseudomonas       |
| Unknown            | Unknown           |
| Unknown            | Unknown           |
| Burkholderiaceae   | Burkholderia      |
| Burkholderiaceae   | Burkholderia      |
| Unknown            | Unknown           |
| Alteromonadaceae   | Unknown           |
| Burkholderiaceae   | Burkholderia      |
| Burkholderiaceae   | Ralstonia         |
| Mycobacteriaceae   | Mycolicibacterium |
| Gordoniaceae       | Gordonia          |
| Gordoniaceae       | Gordonia          |
| Gordoniaceae       | Gordonia          |
| Tsukamurellaceae   | Tsukamurella      |
| Nocardiaceae       | Rhodococcus       |
| Gordoniaceae       | Gordonia          |
| Nocardiaceae       | Rhodococcus       |
| Nocardiaceae       | Nocardia          |
| Nocardiaceae       | Rhodococcus       |
| Gordoniaceae       | Gordonia          |
| Corynebacteriaceae | Corynebacterium   |
| Nocardiaceae       | Rhodococcus       |
| Nocardiaceae       | Rhodococcus       |
| Gordoniaceae       | Gordonia          |
| Corynebacteriaceae | Corynebacterium   |
| Nocardiaceae       | Rhodococcus       |

Gordoniaceae  
Corynebacteriaceae  
Corynebacteriaceae  
Corynebacteriaceae  
Nocardiaceae  
Corynebacteriaceae  
Vibrionaceae  
Vibrionaceae  
Vibrionaceae  
Vibrionaceae  
Vibrionaceae  
Vibrionaceae  
Vibrionaceae  
Streptococcaceae  
Streptococcaceae  
Streptococcaceae  
Streptococcaceae  
Streptococcaceae  
Streptococcaceae  
Streptococcaceae  
Micrococcaceae  
Micrococcaceae  
Micrococcaceae  
Micrococcaceae  
Micrococcaceae  
Micrococcaceae  
Lactobacillaceae  
Leuconostocaceae  
Lactobacillaceae  
Lactobacillaceae  
Lactobacillaceae  
Lactobacillaceae  
Lactobacillaceae  
Lactobacillaceae  
Unknown

Gordonia  
Corynebacterium  
Corynebacterium  
Corynebacterium  
Rhodococcus  
Corynebacterium  
Vibrio  
Vibrio  
Vibrio  
Vibrio  
Vibrio  
Vibrio  
Vibrio  
Streptococcus  
Streptococcus  
Streptococcus  
Streptococcus  
Streptococcus  
Streptococcus  
Streptococcus  
Arthrobacter  
Arthrobacter  
Arthrobacter  
Arthrobacter  
Arthrobacter  
Arthrobacter  
Lactobacillus  
Lactobacillus  
Lactobacillus  
Lactobacillus  
Lactobacillus  
Lactobacillus  
Lactobacillus  
Lactobacillus  
Lactobacillus  
Leuconostoc  
Lactobacillus  
Lactobacillus  
Lactobacillus  
Lactobacillus  
Lactobacillus  
Lactobacillus  
Unknown

|                   |                |
|-------------------|----------------|
| Lactobacillaceae  | Lactobacillus  |
| Staphylococcaceae | Staphylococcus |
| Staphylococcaceae | Staphylococcus |
| Staphylococcaceae | Staphylococcus |
| Unknown           | Unknown        |
| Staphylococcaceae | Staphylococcus |
| Gordoniaceae      | Gordonia       |
| Staphylococcaceae | Staphylococcus |
| Unknown           | Unknown        |
| Unknown           | Unknown        |
| Staphylococcaceae | Staphylococcus |
| Unknown           | Unknown        |
| Unknown           | Unknown        |
| Staphylococcaceae | Staphylococcus |

|                   |                |
|-------------------|----------------|
| Unknown           | Unknown        |
| Unknown           | Unknown        |
| Unknown           | Unknown        |
| Staphylococcaceae | Staphylococcus |
| Microbacteriaceae | Microbacterium |
| Micrococcaceae    | Arthrobacter   |
| Flavobacteriaceae | Flavobacterium |
| Flavobacteriaceae | Flavobacterium |
| Clostridiaceae    | Clostridium    |
| Unknown           | Unknown        |
| Bacteroidaceae    | Bacteroides    |
| Flavobacteriaceae | Croceibacter   |
| Bacillaceae       | Bacillus       |
| Thermaceae        | Thermus        |
| Thermaceae        | Thermus        |
| Thermaceae        | Thermus        |
| Eggerthellaceae   | Eggerthella    |
| Leuconostocaceae  | Weissella      |
| Leuconostocaceae  | Leuconostoc    |
| Leuconostocaceae  | Weissella      |
| Leuconostocaceae  | Weissella      |
| Pseudomonadaceae  | Pseudomonas    |
| Pseudomonadaceae  | Pseudomonas    |
| Vibrionaceae      | Vibrio         |
| Vibrionaceae      | Vibrio         |
| Vibrionaceae      | Vibrio         |

|                    |                |
|--------------------|----------------|
| Vibrionaceae       | Vibrio         |
| Vibrionaceae       | Vibrio         |
| Synechococcaceae   | Synechococcus  |
| Pseudomonadaceae   | Pseudomonas    |
| Unknown            | Unknown        |
| Enterobacteriaceae | Cronobacter    |
| Unknown            | Unknown        |
| Streptomycetaceae  | Streptomyces   |
| Microbacteriaceae  | Microbacterium |
| Streptomycetaceae  | Streptomyces   |
| Pasteurellaceae    | Mannheimia     |
| Unknown            | Unknown        |
| Alcaligenaceae     | Bordetella     |
| Pseudomonadaceae   | Pseudomonas    |
| Pseudomonadaceae   | Pseudomonas    |
| Brucellaceae       | Brucella       |

|                    |                         |
|--------------------|-------------------------|
| Brucellaceae       | Brucella                |
| Brucellaceae       | Brucella                |
| Erwiniaceae        | Pantoea                 |
| Enterobacteriaceae | Escherichia             |
| Enterobacteriaceae | Escherichia             |
| Rhizobiaceae       | Agrobacterium           |
| Rhizobiaceae       | Agrobacterium           |
| Pelagibacteraceae  | Candidatus Pelagibacter |
| Rhodobacteraceae   | Dinoroseobacter         |
| Rhodobacteraceae   | Sulfitobacter           |
| Rhodobacteraceae   | Epibacterium            |
| Unknown            | Unknown                 |
| Unknown            | Nitratiruptor           |
| Unknown            | Unknown                 |
| Vibrionaceae       | Vibrio                  |
| Vibrionaceae       | Vibrio                  |
| Microcoleaceae     | Planktothrix            |
| Unknown            | Unknown                 |
| Rhizobiaceae       | Sinorhizobium           |
| Brucellaceae       | Ochrobactrum            |
| Rhizobiaceae       | Agrobacterium           |
| Streptococcaceae   | Lactococcus             |
| Unknown            | Unknown                 |
| Ruminococcaceae    | Faecalibacterium        |
| Ruminococcaceae    | Faecalibacterium        |
| Aeromonadaceae     | Aeromonas               |
| Aeromonadaceae     | Aeromonas               |
| Aeromonadaceae     | Aeromonas               |
| Vibrionaceae       | Vibrio                  |
| Unknown            | Unknown                 |
| Unknown            | Unknown                 |
| Unknown            | Unknown                 |
| Ruminococcaceae    | Faecalibacterium        |
| Ruminococcaceae    | Faecalibacterium        |
| Flavobacteriaceae  | Nonlabens               |
| Oceanospirillaceae | Marinomonas             |
| Alcaligenaceae     | Achromobacter           |
| Alcaligenaceae     | Achromobacter           |
| Alcaligenaceae     | Achromobacter           |

|                        |                         |
|------------------------|-------------------------|
| Alcaligenaceae         | Achromobacter           |
| Pseudomonadaceae       | Pseudomonas             |
| Burkholderiaceae       | Burkholderia            |
| Burkholderiaceae       | Burkholderia            |
| Unknown                | Unknown                 |
| Unknown                | Unknown                 |
| Bacteroidaceae         | Bacteroides             |
| Unknown                | Unknown                 |
| Comamonadaceae         | Curvibacter             |
| Caulobacteraceae       | Caulobacter             |
| Pelagibacteraceae      | Candidatus Pelagibacter |
| Unknown                | Unknown                 |
| Rhodobacteraceae       | Rhodobacter             |
| Rhodobacteraceae       | Rhodobacter             |
| Vibrionaceae           | Vibrio                  |
| Pseudoalteromonadaceae | Pseudoalteromonas       |
| Vibrionaceae           | Vibrio                  |
| Vibrionaceae           | Vibrio                  |
| Vibrionaceae           | Salinivibrio            |
| Vibrionaceae           | Vibrio                  |
| Alteromonadaceae       | Alteromonas             |
| Microcystaceae         | Microcystis             |
| Vibrionaceae           | Vibrio                  |
| Shewanellaceae         | Shewanella              |
| Shewanellaceae         | Shewanella              |
| Microcystaceae         | Microcystis             |
| Flavobacteriaceae      | Nonlabens               |
| Unknown                | Unknown                 |
| Streptococcaceae       | Streptococcus           |
| Unknown                | Unknown                 |
| Unknown                | Unknown                 |
| Streptococcaceae       | Streptococcus           |
| Staphylococcaceae      | Staphylococcus          |
| Streptococcaceae       | Streptococcus           |

|                  |               |
|------------------|---------------|
| Streptococcaceae | Streptococcus |
| Streptococcaceae | Lactococcus   |
| Streptococcaceae | Streptococcus |
| Micrococcaceae   | Arthrobacter  |
| Streptococcaceae | Streptococcus |
| Enterococcaceae  | Enterococcus  |
| Enterococcaceae  | Enterococcus  |
| Enterococcaceae  | Enterococcus  |
| Bacillaceae      | Bacillus      |
| Unknown          | Unknown       |
| Bacillaceae      | Bacillus      |
| Bacillaceae      | Geobacillus   |
| Bacillaceae      | Bacillus      |
| Bacillaceae      | Bacillus      |
| Listeriaceae     | Listeria      |
| Unknown          | Unknown       |
| Alcaligenaceae   | Achromobacter |
| Pseudomonadaceae | Pseudomonas   |
| Vibrionaceae     | Vibrio        |
| Pseudomonadaceae | Pseudomonas   |
| Erwiniaceae      | Erwinia       |
| Erwiniaceae      | Erwinia       |
| Thermaceae       | Thermus       |

[illegible]



|                   |                  |
|-------------------|------------------|
| Streptomycetaceae | Streptomyces     |
| Streptomycetaceae | Streptomyces     |
| Streptomycetaceae | Streptomyces     |
| Xanthomonadaceae  | Stenotrophomonas |
| Pseudomonadaceae  | Pseudomonas      |
| Pseudomonadaceae  | Pseudomonas      |
| Micrococcaceae    | Arthrobacter     |
| Micrococcaceae    | Arthrobacter     |
| Micrococcaceae    | Arthrobacter     |
| Streptococcaceae  | Streptococcus    |
| Streptococcaceae  | Streptococcus    |
| Paenibacillaceae  | Brevibacillus    |
| Paenibacillaceae  | Brevibacillus    |
| Paenibacillaceae  | Brevibacillus    |
| Clostridiaceae    | Clostridium      |
| Flavobacteriaceae | Flavobacterium   |
| Ruminococcaceae   | Faecalibacterium |
| Bacillaceae       | Bacillus         |
| Bacillaceae       | Bacillus         |
| Unknown           | Unknown          |
| Unknown           | Unknown          |
| Unknown           | Unknown          |
| Bacillaceae       | Exiguobacterium  |
| Unknown           | Unknown          |
| Unknown           | Unknown          |
| Listeriaceae      | Listeria         |
| Unknown           | Unknown          |
| Bacillaceae       | Bacillus         |
| Flavobacteriaceae | Cellulophaga     |
| Bacillaceae       | Anoxybacillus    |
| Paenibacillaceae  | Paenibacillus    |
| Paenibacillaceae  | Paenibacillus    |
| Paenibacillaceae  | Paenibacillus    |
| Vibrionaceae      | Vibrio           |
| Vibrionaceae      | Vibrio           |
| Vibrionaceae      | Vibrio           |
| Bacillaceae       | Exiguobacterium  |
| Bacillaceae       | Exiguobacterium  |
| Bacillaceae       | Bacillus         |
| Bacillaceae       | Bacillus         |
| Bacillaceae       | Bacillus         |
| Unknown           | Unknown          |
| Bacillaceae       | Geobacillus      |
| Bacillaceae       | Caldibacillus    |
| Bacillaceae       | Bacillus         |
| Bacillaceae       | Bacillus         |

|                       |                |
|-----------------------|----------------|
| Bacillaceae           | Bacillus       |
| Unknown               | Unknown        |
| Bacillaceae           | Bacillus       |
| Clostridiaceae        | Clostridium    |
| Peptostreptococcaceae | Clostridioides |
| Unknown               | Unknown        |
| Peptostreptococcaceae | Clostridioides |
| Clostridiaceae        | Clostridium    |
| Vibrionaceae          | Vibrio         |
| Shewanellaceae        | Shewanella     |
| Flavobacteriaceae     | Riemerella     |
| Halomonadaceae        | Halomonas      |
| Unknown               | Unknown        |
| Moraxellaceae         | Acinetobacter  |
| Microbacteriaceae     | Microbacterium |
| Streptomycetaceae     | Streptomyces   |

|                        |                   |
|------------------------|-------------------|
| Nocardiaceae           | Rhodococcus       |
| Synechococcaceae       | Synechococcus     |
| Prochloraceae          | Prochlorococcus   |
| Synechococcaceae       | Synechococcus     |
| Synechococcaceae       | Synechococcus     |
| Pseudoalteromonadaceae | Pseudoalteromonas |
| Vibrionaceae           | Vibrio            |
| Vibrionaceae           | Vibrio            |
| Vibrionaceae           | Vibrio            |
| Streptococcaceae       | Streptococcus     |
| Lactobacillaceae       | Lactobacillus     |
| Microbacteriaceae      | Microbacterium    |
| Streptomycetaceae      | Streptomyces      |
| Streptomycetaceae      | Streptomyces      |
| Streptococcaceae       | Streptococcus     |
| Streptococcaceae       | Streptococcus     |
| Streptococcaceae       | Streptococcus     |
| Ruminococcaceae        | Faecalibacterium  |
| Unknown                | Unknown           |
| Micrococcaceae         | Arthrobacter      |
| Propionibacteriaceae   | Propionibacterium |
| Propionibacteriaceae   | Propionibacterium |
| Propionibacteriaceae   | Propionibacterium |
| Corynebacteriaceae     | Corynebacterium   |
| Pasteurellaceae        | Pasteurella       |
| Nocardiaceae           | Rhodococcus       |
| Gordoniaceae           | Gordonia          |
| Gordoniaceae           | Gordonia          |
| Streptococcaceae       | Streptococcus     |
| Erysipelotrichaceae    | Erysipelothrix    |

|                                                   |                       |
|---------------------------------------------------|-----------------------|
| Lactobacillaceae                                  | Lactobacillus         |
| Lactobacillaceae                                  | Lactobacillus         |
| Lactobacillaceae                                  | Lactobacillus         |
| Propionibacteriaceae                              | Propionibacterium     |
| Propionibacteriaceae                              | Propionibacterium     |
| Propionibacteriaceae                              | Propionibacterium     |
| Microbacteriaceae                                 | Microbacterium        |
| Microbacteriaceae                                 | Microbacterium        |
| Thermoanaerobacterales Family III. Incertae Sedis | Thermoanaerobacterium |
| Streptococcaceae                                  | Streptococcus         |
| Bacillaceae                                       | Bacillus              |
| Clostridiaceae                                    | Clostridium           |
| Clostridiaceae                                    | Clostridium           |
| Lactobacillaceae                                  | Lactobacillus         |
| Micrococcaceae                                    | Arthrobacter          |
| Enterococcaceae                                   | Enterococcus          |
| Lactobacillaceae                                  | Lactobacillus         |
| Ruminococcaceae                                   | Faecalibacterium      |
| Clostridiaceae                                    | Clostridium           |
| Paenibacillaceae                                  | Paenibacillus         |
| Bacillaceae                                       | Geobacillus           |
| Listeriaceae                                      | Listeria              |
| Unknown                                           | Unknown               |
| Unknown                                           | Unknown               |
| Microbacteriaceae                                 | Microbacterium        |
| Micrococcaceae                                    | Arthrobacter          |
| Microcystaceae                                    | Microcystis           |
| Bacillaceae                                       | Bacillus              |
| Bacillaceae                                       | Bacillus              |
| Unknown                                           | Unknown               |
| Microcoleaceae                                    | Planktothrix          |
| Microbacteriaceae                                 | Pontimonas            |
| Nocardiaceae                                      | Rhodococcus           |
| Micrococcaceae                                    | Paeniglutamicibacter  |

|                    |                      |
|--------------------|----------------------|
| Micrococcaceae     | Paeniglutamicibacter |
| Micrococcaceae     | Arthrobacter         |
| Micrococcaceae     | Arthrobacter         |
| Micrococcaceae     | Arthrobacter         |
| Micrococcaceae     | Sinomonas            |
| Micrococcaceae     | Arthrobacter         |
| Microbacteriaceae  | Microbacterium       |
| Microbacteriaceae  | Microbacterium       |
| Brevibacteriaceae  | Brevibacterium       |
| Xanthomonadaceae   | Xanthomonas          |
| Thermaceae         | Thermus              |
| Thermaceae         | Meiothermus          |
| Thermaceae         | Thermus              |
| Lactobacillaceae   | Lactobacillus        |
| Leuconostocaceae   | Weissella            |
| Lactobacillaceae   | Lactobacillus        |
| Rhizobiaceae       | Rhizobium            |
| Rhizobiaceae       | Rhizobium            |
| Erwiniaceae        | Erwinia              |
| Enterobacteriaceae | Cronobacter          |
| Erwiniaceae        | Erwinia              |
| Vibrionaceae       | Vibrio               |
| Erwiniaceae        | Erwinia              |
| Yersiniaceae       | Serratia             |
| Yersiniaceae       | Serratia             |
| Microbacteriaceae  | Microbacterium       |
| Nocardiopsaceae    | Thermobifida         |
| Nocardiopsaceae    | Thermobifida         |
| Bacillaceae        | Bacillus             |
| Bacillaceae        | Bacillus             |
| Bacillaceae        | Bacillus             |
| Bacillaceae        | Exiguobacterium      |
| Rhodobacteraceae   | Pelagibaca           |
| Sphingomonadaceae  | Sphingobium          |
| Rhodobacteraceae   | Ruegeria             |
| Rhodobacteraceae   | Ruegeria             |

|                       |                 |
|-----------------------|-----------------|
| Rhodobacteraceae      | Paracoccus      |
| Rhodobacteraceae      | Roseobacter     |
| Rhodobacteraceae      | Roseobacter     |
| Vibrionaceae          | Vibrio          |
| Shewanellaceae        | Shewanella      |
| Vibrionaceae          | Vibrio          |
| Vibrionaceae          | Vibrio          |
| Alteromonadaceae      | Alteromonas     |
| Vibrionaceae          | Vibrio          |
| Pseudomonadaceae      | Pseudomonas     |
| Flavobacteriaceae     | Flavobacterium  |
| Pseudomonadaceae      | Pseudomonas     |
| Unknown               | Unknown         |
| Micrococcaceae        | Arthrobacter    |
| Bacillaceae           | Bacillus        |
| Bacillaceae           | Bacillus        |
| Unknown               | Unknown         |
| Paenibacillaceae      | Brevibacillus   |
| Micrococcaceae        | Arthrobacter    |
| Unknown               | Unknown         |
| Unknown               | Unknown         |
| Synechococcaceae      | Synechococcus   |
| Synechococcaceae      | Synechococcus   |
| Unknown               | Unknown         |
| Streptomycetaceae     | Streptomyces    |
| Streptomycetaceae     | Streptomyces    |
| Streptomycetaceae     | Streptomyces    |
| Unknown               | Unknown         |
| Synechococcaceae      | Synechococcus   |
| Synechococcaceae      | Synechococcus   |
| Streptococcaceae      | Lactococcus     |
| Unknown               | Unknown         |
| Flavobacteriaceae     | Croceibacter    |
| Prochloraceae         | Prochlorococcus |
| Synechococcaceae      | Synechococcus   |
| Synechococcaceae      | Synechococcus   |
| Paenibacillaceae      | Paenibacillus   |
| Brevibacteriaceae     | Brevibacterium  |
| Peptostreptococcaceae | Clostridioides  |

|                    |                  |
|--------------------|------------------|
| Streptomycetaceae  | Streptomyces     |
| Rhodobacteraceae   | Dinoroseobacter  |
| Unknown            | Unknown          |
| Pseudomonadaceae   | Pseudomonas      |
| Pseudomonadaceae   | Pseudomonas      |
| Microbacteriaceae  | Clavibacter      |
| Xanthomonadaceae   | Xylella          |
| Pseudomonadaceae   | Pseudomonas      |
| Pseudomonadaceae   | Pseudomonas      |
| Actinomycetaceae   | Actinomyces      |
| Bifidobacteriaceae | Bifidobacterium  |
| Yersiniaceae       | Yersinia         |
| Thermaceae         | Thermus          |
| Thermaceae         | Thermus          |
| Lactobacillaceae   | Lactobacillus    |
| Staphylococcaceae  | Staphylococcus   |
| Burkholderiaceae   | Ralstonia        |
| Unknown            | Unknown          |
| Unknown            | Unknown          |
| Unknown            | Unknown          |
| Xanthomonadaceae   | Xanthomonas      |
| Intrasporangiaceae | Tetrasphaera     |
| Sphingomonadaceae  | Citromicrobium   |
| Aerococcaceae      | Aerococcus       |
| Bacillaceae        | Bacillus         |
| Unknown            | Unknown          |
| Ruminococcaceae    | Faecalibacterium |
| Unknown            | Unknown          |
| Unknown            | Unknown          |
| Unknown            | Unknown          |
| Ruminococcaceae    | Faecalibacterium |
| Unknown            | Unknown          |
| Unknown            | Unknown          |
| Bacillaceae        | Bacillus         |
| Unknown            | Unknown          |
| Microbacteriaceae  | Rathayibacter    |
| Micrococcaceae     | Arthrobacter     |
| Enterococcaceae    | Enterococcus     |
| Streptococcaceae   | Streptococcus    |
| Enterococcaceae    | Enterococcus     |

**Host species**

Mycolicibacterium smegmatis  
Unknown  
Mycolicibacterium smegmatis  
Gordonia terrae  
Gordonia terrae  
Gordonia terrae  
Gordonia terrae  
Gordonia terrae  
Gordonia terrae  
Unknown  
Gordonia terrae  
Gordonia terrae  
Gordonia terrae  
Gordonia terrae  
Gordonia westfalica  
Gordonia terrae  
Tsukamurella paurometabola  
Gordonia terrae  
Gordonia terrae  
Gordonia terrae

## Mycolicibacterium smegmatis

Mycolicibacterium smegmatis  
Mycobacterium tuberculosis  
Unknown  
Mycolicibacterium smegmatis  
Arthrobacter sp. ATCC 21022  
Arthrobacter globiformis  
Arthrobacter globiformis  
Arthrobacter globiformis  
Arthrobacter globiformis  
Arthrobacter globiformis  
Arthrobacter globiformis  
Gordonia malaquae  
Rhodococcus erythropolis  
Gordonia terrae  
Gordonia terrae  
Gordonia neofelifaecis  
Unknown  
Rhodococcus hoagii  
Rhodococcus hoagii  
Mycolicibacterium smegmatis  
Mycolicibacterium smegmatis  
Mycolicibacterium smegmatis  
Mycolicibacterium smegmatis  
Mycolicibacterium smegmatis  
Mycolicibacterium smegmatis  
Unknown  
Unknown  
Gordonia sp.  
Gordonia sp.  
Gordonia malaquae

Gordonia terrae  
Gordonia terrae  
Gordonia terrae  
Gordonia terrae  
Nocardia asteroides  
Tsukamurella inchoensis  
Tsukamurella inchoensis  
Gordonia terrae  
Gordonia rubripertincta  
Gordonia terrae  
Gordonia terrae  
Acidovorax citrulli  
Pseudomonas aeruginosa  
Achromobacter anemicus  
Unknown  
Vibrio coralliilyticus  
Caulobacter vibrioides  
Caulobacter vibrioides  
Erythrobacter litoralis  
Unknown  
Nitrincola sp.  
Pseudomonas sp.  
Sinorhizobium meliloti  
Sinorhizobium sp. LM21  
Sinorhizobium sp. LM21  
Pseudomonas fluorescens  
Aeromonas hydrophila  
Synechococcus sp. WH 7803  
Synechococcus sp.  
Unknown  
Synechococcus sp.  
Synechococcus sp.  
Synechococcus sp.  
Xanthomonas euvesicatoria  
Xanthomonas oryzae  
Xanthomonas oryzae  
Unknown

Xanthomonas oryzae  
Xanthomonas oryzae  
Unknown  
Pantoea sp.  
Salmonella enterica  
Salmonella enterica  
Proteus mirabilis  
Raoultella ornithinolytica  
Cronobacter sakazakii  
Escherichia coli  
Pseudomonas fluorescens  
Pseudomonas sp.  
Pseudomonas fluorescens  
Unknown  
Pseudomonas syringae  
Unknown  
Unknown  
Microcystis aeruginosa  
Ochrobactrum anthropi  
Sphingomonas paucimobilis  
Unknown  
Unknown  
Unknown  
Flavobacterium sp.  
Achromobacter xylosoxidans  
Enterobacter sp. CT7  
Escherichia coli  
Escherichia coli  
Escherichia coli  
Salmonella enterica  
Salmonella enterica  
Cronobacter sakazakii  
Escherichia coli  
Klebsiella pneumoniae  
Klebsiella pneumoniae  
Klebsiella pneumoniae  
Klebsiella pneumoniae  
Klebsiella pneumoniae  
Klebsiella pneumoniae  
Escherichia coli  
Aeromonas salmonicida  
Salmonella enterica  
Salmonella enterica  
Pantoea sp.  
Unknown  
Escherichia coli

[illegible]

Gordonia terrae  
Gordonia terrae  
Gordonia terrae  
Gordonia terrae  
Gordonia rubripertincta  
Gordonia terrae  
Mycolicibacterium smegmatis  
Unknown  
Mycolicibacterium smegmatis  
Mycolicibacterium smegmatis  
Corynebacterium vitaeruminis  
Corynebacterium vitaeruminis  
Corynebacterium vitaeruminis  
Corynebacterium vitaeruminis  
Corynebacterium vitaeruminis  
Corynebacterium vitaeruminis  
Corynebacterium glutamicum  
Corynebacterium xerosis  
Corynebacterium xerosis  
Corynebacterium glutamicum  
Corynebacterium glutamicum  
Gordonia terrae  
Gordonia terrae  
Gordonia terrae  
Gordonia terrae  
Rhodococcus erythropolis  
Gordonia terrae  
Gordonia terrae  
Gordonia terrae  
Gordonia terrae  
Gordonia terrae  
Gordonia terrae  
Mycolicibacterium smegmatis  
Mycolicibacterium smegmatis  
Listeria monocytogenes  
Unknown  
Listeria monocytogenes  
Lactobacillus casei  
Lactobacillus casei

Lactobacillus paracasei  
Lactobacillus paracasei  
Lactobacillus paracasei  
Lactobacillus paracasei  
Lactobacillus paracasei  
Lactococcus lactis  
Enterococcus faecalis  
Unknown  
Unknown  
Enterococcus faecalis  
Enterococcus faecium  
Enterococcus faecalis  
Streptococcus pneumoniae  
Enterococcus faecalis  
Enterococcus faecalis

Enterococcus faecalis  
Enterococcus faecalis  
Enterococcus faecalis  
Enterococcus faecalis  
Enterococcus faecalis  
Aeromonas salmonicida  
Aeromonas sp.  
Aeromonas salmonicida  
Aeromonas salmonicida  
Aeromonas hydrophila  
Aeromonas salmonicida  
Aeromonas hydrophila  
Aeromonas salmonicida  
Aeromonas salmonicida  
Aeromonas salmonicida  
Aeromonas salmonicida  
Aeromonas salmonicida  
Aeromonas salmonicida  
Aeromonas hydrophila  
Aeromonas hydrophila  
Aeromonas salmonicida  
Aeromonas salmonicida  
Vibrio pelagius  
Vibrio sp. YD38  
Vibrio alginolyticus  
Vibrio sagamiensis  
Vibrio cyclitrophicus  
Vibrio cyclitrophicus  
Vibrio cyclitrophicus  
Vibrio lentus  
Vibrio sp. 12G05  
Vibrio sp. F12  
Escherichia coli  
Pseudomonas fluorescens  
Pseudomonas tolaasii  
Pseudomonas sp.  
Pseudomonas putida  
Pseudomonas fluorescens  
Candidatus Pelagibacter sp. FZCC0015  
Candidatus Pelagibacter ubique  
Candidatus Pelagibacter ubique  
Pseudoalteromonas sp. Bq0  
Marinobacter sp.  
Pseudoalteromonas marina  
Pseudoalteromonas marina  
Candidatus Pelagibacter sp. HTCC7211

Candidatus Pelagibacter sp. FZCC0015

Unknown

Pantoea agglomerans

Colwellia psychrerythraea

Unknown

Candidatus Puniceispirillum marinum

Unknown

Xanthomonas arboricola

Aeromonas hydrophila

Aeromonas hydrophila

Aeromonas hydrophila

Vibrio cholerae

Enterovibrio norvegicus

Gordonia terrae

Gordonia sputi

Gordonia terrae

Unknown

Unknown

Bacillus cereus

Bacillus thuringiensis

Bacillus cereus

Bacillus cereus

Bacillus cereus

Bacillus cereus

Bacillus cereus

Bacillus cereus  
Streptococcus equi  
Streptococcus pyogenes  
Streptococcus dysgalactiae  
Streptococcus dysgalactiae  
Streptococcus dysgalactiae  
Unknown  
Streptococcus suis  
Streptococcus suis  
Streptococcus suis  
Unknown  
Streptomyces griseofuscus  
Streptomyces griseus  
Streptomyces lividans  
Streptomyces griseus  
Streptomyces griseus  
Streptomyces griseus  
Streptomyces griseus  
Streptomyces griseus  
Streptomyces griseus  
Streptomyces lividans  
Streptomyces griseus  
Streptomyces griseus  
Streptomyces platensis  
Streptomyces lividans  
Streptomyces lividans  
Streptomyces griseus  
Streptomyces griseus  
Streptomyces griseus  
Streptomyces griseus  
Streptomyces griseus  
Streptomyces griseofuscus  
Streptomyces viridochromogenes  
Streptomyces griseus  
Streptomyces griseus  
Streptomyces griseus  
Streptomyces griseus  
Streptomyces scabiei  
Streptomyces scabiei  
Streptomyces toxytricini

Streptomyces xanthochromogenes  
Streptomyces xanthochromogenes  
Streptomyces xanthochromogenes  
Streptomyces xanthochromogenes  
Streptomyces xanthochromogenes  
Streptomyces venezuelae  
Streptomyces venezuelae  
Streptomyces venezuelae  
Streptomyces venezuelae  
Streptomyces venezuelae  
Streptomyces griseofuscus  
Streptomyces lividans  
Streptomyces sp. ZL12  
Streptomyces lividans  
Streptomyces venezuelae  
Streptomyces toxytricini  
Streptomyces griseus  
Streptomyces griseus  
Streptomyces griseus  
Streptomyces griseus  
Streptomyces avermitilis  
Streptomyces mirabilis  
Streptomyces flavovirens  
Streptomyces griseus  
Streptomyces griseus  
Enterococcus faecium  
Enterococcus faecalis  
Enterococcus faecalis  
Enterococcus faecalis  
Enterococcus faecalis  
Enterococcus faecalis  
Unknown  
Enterococcus faecalis  
Enterococcus faecalis  
Enterococcus faecalis  
Enterococcus faecalis  
Enterococcus faecalis  
Enterococcus faecium  
Enterococcus faecium  
Enterococcus faecalis  
Enterococcus faecalis  
Unknown  
Enterococcus faecalis  
Unknown  
Enterococcus faecalis  
Enterococcus faecalis

Enterococcus faecalis  
Unknown  
Lactococcus lactis  
Leuconostoc mesenteroides  
Leuconostoc mesenteroides  
Leuconostoc mesenteroides  
Leuconostoc mesenteroides  
Streptococcus henryi  
Streptococcus iniae  
Lactobacillus pentosus  
Lactobacillus plantarum  
Lactobacillus brevis  
Lactobacillus plantarum  
Lactobacillus plantarum  
Lactobacillus plantarum  
Lactobacillus plantarum  
Lactobacillus plantarum  
Lactobacillus plantarum  
Lactobacillus brevis  
Lactobacillus brevis  
Unknown  
Lactobacillus brevis  
Lactobacillus brevis  
Bacillus thuringiensis  
Bacillus thuringiensis  
Bacillus thuringiensis  
Bacillus thuringiensis  
Virgibacillus halotolerans  
Bacillus amyloliquefaciens  
Bacillus subtilis  
Bacillus subtilis  
Bacillus thuringiensis  
Bacillus cereus  
Unknown  
Bacillus thuringiensis  
Bacillus cereus  
Unknown  
Bacillus cereus  
Bacillus cereus

Bacillus cereus  
Bacillus thuringiensis  
Bacillus thuringiensis  
Bacillus thuringiensis  
Bacillus thuringiensis  
Bacillus cereus  
Unknown  
Unknown  
Bacillus thuringiensis  
Bacillus thuringiensis  
Bacillus thuringiensis  
Bacillus thuringiensis  
Unknown  
Bacillus thuringiensis  
Bacillus thuringiensis  
Bacillus cereus  
Bacillus cereus  
Bacillus cereus  
Lactococcus lactis  
Lactococcus lactis  
Lactococcus lactis  
Lactococcus lactis  
Enterococcus faecium  
Enterococcus faecalis  
Brochothrix thermosphacta  
Brochothrix thermosphacta  
Enterococcus faecalis  
Enterococcus faecium  
Enterococcus faecium  
Streptococcus ictaluri  
Brochothrix thermosphacta  
Enterococcus faecium  
Enterococcus faecium  
Staphylococcus pseudintermedius  
Staphylococcus pseudintermedius  
Staphylococcus aureus  
Staphylococcus pseudintermedius  
Staphylococcus pseudintermedius  
Staphylococcus sciuri  
Staphylococcus sciuri  
Staphylococcus epidermidis  
Staphylococcus epidermidis  
Staphylococcus epidermidis  
Bordetella bronchiseptica  
Bordetella bronchiseptica  
Bordetella bronchiseptica

Bordetella bronchiseptica  
Bordetella bronchiseptica  
Pseudomonas aeruginosa  
Unknown  
Yersinia enterocolitica  
Bordetella bronchiseptica  
Streptococcus anginosus  
Streptococcus pyogenes  
Streptococcus dysgalactiae  
Streptococcus suis  
Streptococcus suis  
Streptococcus suis  
Streptococcus suis  
Streptococcus orisratti  
Streptococcus suis  
Streptococcus equi  
Streptococcus urinalis  
Streptococcus constellatus  
Streptococcus agalactiae  
Streptococcus anginosus  
Streptococcus porcinus  
Streptococcus agalactiae  
Streptococcus urinalis  
Streptococcus agalactiae  
Streptococcus agalactiae  
Microbacterium foliorum  
Arthrobacter sp. ATCC 21022  
Arthrobacter sp. ATCC 21022

Caulobacter vibrioides

Caulobacter vibrioides  
Pectobacterium carotovorum  
Pectobacterium carotovorum  
Cronobacter sakazakii  
Unknown  
Aeromonas salmonicida  
Aeromonas hydrophila  
Aeromonas hydrophila  
Aeromonas hydrophila  
Salmonella enterica  
Unknown  
Yersinia enterocolitica  
Unknown  
Yersinia enterocolitica  
Aeromonas hydrophila  
Aeromonas hydrophila  
Unknown  
Vibrio diazotrophicus  
Vibrio cyclitrophicus  
Dickeya dadantii  
Cronobacter sakazakii  
Pasteurella multocida  
Klebsiella pneumoniae  
Klebsiella pneumoniae  
Klebsiella pneumoniae  
Enterobacter cloacae  
Salmonella enterica  
Salmonella enterica  
Unknown  
Salmonella enterica  
Escherichia coli  
Unknown  
Escherichia sp.  
Haemophilus influenzae  
Haemophilus influenzae  
Pasteurella multocida  
Mannheimia haemolytica  
Mannheimia haemolytica  
Mannheimia haemolytica  
Bacillus mycoides  
Bacillus thuringiensis  
Bacillus thuringiensis  
Nodularia spumigena  
Nodularia sp. (in: Bacteria)  
Nodularia spumigena  
Acidithiobacillus caldus

Unknown  
Synechococcus sp. CB0204  
Erwinia amylovora  
Erwinia amylovora  
Escherichia sp.  
Escherichia coli  
Unknown  
Unknown  
Rhizobium etli  
Pseudomonas aeruginosa  
Unknown  
Xanthomonas citri  
Burkholderia thailandensis  
Synechococcus sp.  
Synechococcus sp.  
Unknown  
Unknown  
Unknown  
Synechococcus sp. TCC793  
Synechococcus sp. CB0202  
Synechococcus sp.  
Unknown  
Synechococcus sp.  
Synechococcus sp.  
Synechococcus sp. CB0101  
Achromobacter xylosoxidans  
Achromobacter xylosoxidans  
Achromobacter xylosoxidans  
Pseudomonas syringae  
Pseudomonas syringae  
Pseudomonas syringae  
Pseudomonas syringae  
Pseudomonas syringae  
Pseudomonas aeruginosa  
Pseudomonas fluorescens  
Synechococcus sp.  
Unknown  
Unknown  
Unknown  
Unknown  
Unknown  
Unknown  
Staphylococcus aureus  
Staphylococcus aureus  
Staphylococcus pseudintermedius  
Staphylococcus pseudintermedius

Staphylococcus pseudintermedius  
Unknown  
Staphylococcus pseudintermedius  
Staphylococcus pseudintermedius  
Staphylococcus pseudintermedius  
Staphylococcus aureus  
Staphylococcus epidermidis  
Staphylococcus epidermidis  
Staphylococcus epidermidis  
Staphylococcus aureus  
Staphylococcus aureus  
Staphylococcus capitis  
Streptomyces coelicolor  
Streptomyces venezuelae  
Streptomyces venezuelae  
Streptomyces venezuelae  
Unknown  
Streptomyces griseus  
Streptomyces xanthochromogenes  
Streptomyces griseus  
Streptomyces xanthochromogenes  
Streptomyces lividans  
Streptomyces xanthochromogenes  
Streptomyces xanthochromogenes  
Streptomyces venezuelae  
Streptomyces venezuelae  
Streptomyces viridochromogenes  
Streptomyces coelicolor  
Streptomyces sp.  
Streptomyces platensis  
Bacillus megaterium  
Bacillus thuringiensis  
Bacillus cereus  
Bacillus thuringiensis  
Bacillus cereus  
Bacillus thuringiensis  
Listeria monocytogenes  
Listeria monocytogenes  
Listeria sp.

## Escherichia coli

Escherichia coli  
Escherichia coli  
Escherichia coli  
Escherichia coli  
Shigella sonnei  
Escherichia coli  
Cronobacter malonaticus  
Acinetobacter baumannii  
Acinetobacter johnsonii  
Acinetobacter baumannii  
Acinetobacter baumannii  
Acinetobacter johnsonii  
Acinetobacter johnsonii  
Unknown  
Acinetobacter baumannii  
Acinetobacter baumannii  
Acinetobacter baumannii  
Acinetobacter baumannii  
Acinetobacter baumannii  
Acinetobacter baumannii  
Acinetobacter johnsonii  
Unknown  
Acinetobacter baumannii  
Acinetobacter baumannii  
Unknown  
Unknown  
Acinetobacter baumannii  
Acinetobacter baumannii  
Sinorhizobium meliloti  
Sinorhizobium meliloti  
Rhizobium etli  
Sinorhizobium sp. LM21  
Acaryochloris marina  
Acaryochloris marina  
Ruegeria pomeroyi  
Ruegeria pomeroyi  
Unknown  
Unknown  
Unknown  
Agrobacterium tumefaciens  
Bacillus cereus  
Bacillus thuringiensis  
Bacillus thuringiensis  
Unknown  
Unknown  
Bacillus thuringiensis

Bacillus thuringiensis  
Unknown  
Bacillus thuringiensis  
Bacillus thuringiensis  
Streptomyces platensis  
Streptomyces platensis  
Streptomyces xanthochromogenes  
Streptomyces xanthochromogenes  
Streptomyces xanthochromogenes  
Streptomyces coelicolor  
Streptomyces azureus  
Streptomyces azureus  
Streptomyces lividans  
Streptomyces cattleya  
Streptomyces platensis  
Streptomyces mirabilis  
Streptomyces griseus  
Streptomyces xanthochromogenes  
Streptomyces griseus  
Streptomyces griseus  
Streptomyces azureus  
Streptomyces xanthochromogenes  
Streptomyces lividans  
Streptomyces lividans  
Arthrobacter sp. ATCC 21022  
Arthrobacter globiformis  
Arthrobacter globiformis  
Arthrobacter sp. ATCC 21022  
Pseudomonas aeruginosa  
Unknown  
Pseudomonas aeruginosa  
Pseudomonas aeruginosa  
Unknown

Pseudomonas aeruginosa  
Unknown  
Pseudomonas aeruginosa  
Unknown  
Unknown  
Burkholderia cenocepacia  
Burkholderia thailandensis  
Unknown  
Unknown  
Burkholderia cenocepacia  
Ralstonia solanacearum  
Mycolicibacterium smegmatis  
Gordonia terrae  
Gordonia terrae  
Gordonia terrae  
Tsukamurella paurometabola  
Rhodococcus erythropolis  
Gordonia malaquae  
Rhodococcus hoagii  
Nocardia brasiliensis  
Rhodococcus hoagii  
Rhodococcus erythropolis  
Rhodococcus erythropolis  
Rhodococcus erythropolis  
Gordonia neofelifaecis  
[Brevibacterium] flavum  
Rhodococcus hoagii  
Rhodococcus hoagii  
Gordonia malaquae  
Gordonia terrae  
Gordonia terrae  
Gordonia terrae  
Corynebacterium xerosis  
Corynebacterium xerosis  
Corynebacterium xerosis  
Corynebacterium xerosis  
Corynebacterium xerosis  
Rhodococcus erythropolis

[illegible]

Lactobacillus helveticus  
Lactobacillus johnsonii  
Lactobacillus johnsonii  
Lactobacillus gasseri  
Lactobacillus gasseri  
Lactobacillus gasseri  
Staphylococcus haemolyticus  
Staphylococcus haemolyticus  
Staphylococcus haemolyticus  
Unknown  
Staphylococcus epidermidis  
Staphylococcus hominis  
Staphylococcus aureus  
Staphylococcus aureus  
Staphylococcus aureus  
Staphylococcus aureus  
Staphylococcus aureus  
Staphylococcus aureus  
Staphylococcus warneri  
Staphylococcus pseudintermedius  
Gordonia malaquae  
Gordonia terrae  
Staphylococcus hyicus  
Staphylococcus aureus  
Staphylococcus aureus  
Staphylococcus aureus  
Staphylococcus aureus  
Staphylococcus aureus  
Staphylococcus sp.  
Unknown  
Unknown  
Staphylococcus capitis  
Unknown  
Unknown  
Staphylococcus epidermidis  
Staphylococcus epidermidis  
Staphylococcus epidermidis  
Staphylococcus aureus

Unknown  
Unknown  
Unknown  
Staphylococcus epidermidis  
Staphylococcus aureus  
Staphylococcus sp.  
Staphylococcus aureus  
Staphylococcus hyicus  
Microbacterium foliorum  
Microbacterium foliorum  
Microbacterium foliorum  
Microbacterium foliorum  
Microbacterium foliorum  
Microbacterium natorense  
Arthrobacter sp. ATCC 21022  
Flavobacterium psychrophilum  
Flavobacterium psychrophilum  
Clostridium perfringens  
Clostridium perfringens  
Clostridium perfringens  
Unknown  
Unknown  
Unknown  
Bacteroides dorei  
Croceibacter atlanticus  
Bacillus cereus  
Thermus thermophilus  
Thermus scotoductus  
Thermus scotoductus  
Eggerthella lenta  
Weissella cibaria  
Leuconostoc pseudomesenteroides  
Weissella sp.  
Weissella ceti  
Pseudomonas aeruginosa  
Pseudomonas aeruginosa  
Vibrio cyclitrophicus  
Vibrio cyclitrophicus  
Vibrio cyclitrophicus

Vibrio cyclitrophicus  
Vibrio diazotrophicus  
Synechococcus sp. CB0208  
Pseudomonas aeruginosa  
Unknown  
Cronobacter sakazakii  
Unknown  
Streptomyces scabiei  
Streptomyces griseus  
Streptomyces griseus  
Streptomyces griseus  
Streptomyces griseus  
Microbacterium paraoxydans  
Microbacterium paraoxydans  
Microbacterium paraoxydans  
Microbacterium paraoxydans  
Microbacterium foliorum  
Streptomyces griseus  
Streptomyces griseus  
Streptomyces griseus  
Streptomyces griseus  
Streptomyces griseus  
Streptomyces scabiei  
Streptomyces scabiei  
Streptomyces lividans  
Streptomyces viridochromogenes  
Streptomyces griseus  
Streptomyces griseus  
Streptomyces griseus  
Streptomyces lividans  
Streptomyces griseus  
Streptomyces platensis  
Mannheimia haemolytica  
Unknown  
Bordetella bronchiseptica  
Pseudomonas putida  
Pseudomonas lactis  
Brucella abortus

Brucella sp.  
Brucella canis  
Pantoea agglomerans  
Escherichia coli  
Escherichia coli  
Agrobacterium sp. H13-3  
Agrobacterium tumefaciens  
Candidatus Pelagibacter ubique  
Dinoroseobacter shibae  
Sulfitobacter sp. CB2047  
Epibacterium mobile  
Unknown  
Nitratiruptor sp. SB155-2  
Unknown  
Vibrio sp.  
Vibrio maritimus  
Planktothrix agardhii  
Unknown  
Sinorhizobium meliloti  
Ochrobactrum intermedium  
Agrobacterium tumefaciens  
Lactococcus lactis  
Lactococcus lactis  
Lactococcus lactis  
Lactococcus lactis  
Lactococcus lactis  
Unknown  
Faecalibacterium prausnitzii  
Faecalibacterium prausnitzii  
Aeromonas hydrophila  
Aeromonas salmonicida  
Aeromonas hydrophila  
Vibrio parahaemolyticus  
Vibrio cyclitrophicus  
Vibrio parahaemolyticus  
Vibrio parahaemolyticus  
Unknown  
Unknown  
Unknown  
Faecalibacterium prausnitzii  
Faecalibacterium prausnitzii  
Unknown  
Marinomonas sp.  
Achromobacter xylosoxidans  
Achromobacter xylosoxidans  
Achromobacter xylosoxidans

Achromobacter xylosoxidans  
Pseudomonas aeruginosa  
Unknown  
Burkholderia pseudomallei  
Unknown  
Unknown  
Bacteroides fragilis  
Unknown  
Curvibacter sp.  
Caulobacter vibrioides  
Candidatus Pelagibacter ubique  
Unknown  
Rhodobacter capsulatus  
Rhodobacter capsulatus  
Vibrio splendidus  
Vibrio splendidus  
Vibrio lentus  
Vibrio cyclitrophicus  
Pseudoalteromonas sp. YD6  
Vibrio splendidus  
Vibrio splendidus  
Salinivibrio sp.  
Vibrio tasmaniensis  
Alteromonas gracilis  
Microcystis elabens  
Vibrio parahaemolyticus  
Shewanella putrefaciens  
Shewanella putrefaciens  
Unknown  
Unknown  
Unknown  
Streptococcus thermophilus  
Streptococcus thermophilus  
Streptococcus thermophilus  
Streptococcus thermophilus  
Unknown  
Unknown  
Streptococcus gordonii  
Streptococcus parasanguinis  
Streptococcus thermophilus  
Streptococcus thermophilus  
Streptococcus dysgalactiae  
Streptococcus pyogenes  
Streptococcus pyogenes  
Staphylococcus aureus  
Streptococcus suis

Streptococcus azizii  
Streptococcus pyogenes  
Streptococcus dysgalactiae  
Streptococcus dysgalactiae  
Lactococcus lactis  
Unknown  
Arthrobacter globiformis  
Arthrobacter globiformis  
Arthrobacter globiformis  
Arthrobacter globiformis  
Arthrobacter globiformis  
Streptococcus thoraltensis  
Enterococcus faecium  
Enterococcus faecalis  
Enterococcus faecalis  
Bacillus cereus  
Bacillus cereus  
Bacillus cereus  
Bacillus cohnii  
Unknown  
Bacillus halmapalus  
Geobacillus kaustophilus  
Bacillus pumilus  
Bacillus subtilis  
Listeria monocytogenes  
Listeria monocytogenes  
Listeria monocytogenes  
Listeria monocytogenes  
Listeria monocytogenes  
Unknown  
Unknown  
Unknown  
Unknown  
Achromobacter xylosoxidans  
Pseudomonas aeruginosa  
Pseudomonas aeruginosa  
Unknown  
Pseudomonas aeruginosa  
Vibrio harveyi  
Vibrio parahaemolyticus  
Vibrio alginolyticus  
Vibrio alginolyticus  
Pseudomonas aeruginosa  
Erwinia amylovora  
Erwinia amylovora  
Thermus sp. TC4

[illegible]

Unknown  
Listeria monocytogenes  
Listeria monocytogenes  
Listeria monocytogenes  
Bacillus anthracis  
Unknown  
Bacillus subtilis  
Unknown  
Bacillus megaterium  
Bacillus megaterium  
Bacillus megaterium  
Listeria monocytogenes  
Listeria monocytogenes  
Bacillus paralicheniformis  
Bacillus pseudocaliphilus  
Bacillus subtilis  
Unknown  
Thermus thermophilus  
Flavobacterium sp.  
Vibrio cholerae  
Vibrio cholerae  
Vibrio cholerae  
Cellulophaga baltica  
Cellulophaga baltica  
Cellulophaga baltica  
Gordonia sp.  
Gordonia sp.  
Gordonia malaquae  
Gordonia terrae  
Sulfitobacter sp. EE-36  
Ruegeria pomeroyi  
Ruegeria pomeroyi  
Roseobacter denitrificans  
Ruegeria pomeroyi  
Paracoccus thiocyanatus  
Paracoccus kondratievae  
Sinorhizobium meliloti  
Unknown  
Streptomyces azureus  
Streptomyces venezuelae  
Streptomyces venezuelae  
Streptomyces coelicolor  
Streptomyces coelicolor  
Unknown  
Streptomyces griseus  
Streptomyces griseus

Streptomyces griseus  
Streptomyces lividans  
Streptomyces griseus  
Stenotrophomonas maltophilia  
Pseudomonas aeruginosa  
Pseudomonas aeruginosa  
Arthrobacter sp. ATCC 21022  
Arthrobacter sp. ATCC 21022  
Arthrobacter sp. ATCC 21022  
Streptococcus porcinus  
Streptococcus agalactiae  
Brevibacillus laterosporus  
Brevibacillus laterosporus  
Brevibacillus laterosporus  
Unknown  
Flavobacterium sp. B183  
Faecalibacterium prausnitzii  
Bacillus megaterium  
Bacillus megaterium  
Unknown  
Unknown  
Unknown  
Exiguobacterium aurantiacum  
Unknown  
Unknown  
Listeria weihenstephanensis  
Unknown  
Bacillus pseudocaliphilus  
Unknown  
Anoxybacillus caldiproteolyticus  
Paenibacillus larvae  
Paenibacillus larvae  
Paenibacillus larvae  
Vibrio cholerae  
Vibrio cholerae  
Unknown  
Exiguobacterium alkaliphilum  
Exiguobacterium aurantiacum  
Bacillus subtilis  
Bacillus subtilis  
Bacillus megaterium  
Unknown  
Geobacillus sp. E263  
Caldibacillus debilis  
Bacillus sp. (in: Bacteria)  
Bacillus alcalophilus

Bacillus cereus  
Bacillus thuringiensis  
Bacillus cereus  
Bacillus cereus  
Bacillus thuringiensis  
Unknown  
Bacillus cereus  
Bacillus cereus  
Bacillus thuringiensis  
Bacillus anthracis  
Unknown  
Clostridioides difficile  
Unknown  
Clostridioides difficile  
Clostridium sporogenes  
Clostridium saccharoperbutylacetonicum  
Clostridium perfringens  
Clostridium perfringens  
Clostridium perfringens  
Clostridium perfringens  
Clostridium perfringens  
Unknown  
Vibrio cholerae  
Vibrio cholerae  
Vibrio lentus  
Vibrio splendidus  
Vibrio metschnikovii  
Shewanella inventionis  
Riemerella anatipestifer  
Halomonas ventosae  
Unknown  
Acinetobacter baumannii  
Unknown  
Acinetobacter johnsonii  
Acinetobacter johnsonii  
Microbacterium foliorum  
Microbacterium paraoxydans  
Microbacterium foliorum  
Streptomyces sp.

Rhodococcus erythropolis  
Rhodococcus erythropolis  
Rhodococcus erythropolis  
Rhodococcus erythropolis  
Unknown  
Synechococcus sp. CB0101  
Synechococcus sp. CB0101  
Synechococcus sp. CB0101  
Prochlorococcus marinus  
Synechococcus sp. CB0201  
Synechococcus sp.  
Pseudoalteromonas sp.  
Vibrio alginolyticus  
Vibrio parahaemolyticus  
Vibrio sp.  
Streptococcus thermophilus  
Lactobacillus delbrueckii  
Microbacterium paraoxydans  
Microbacterium paraoxydans  
Microbacterium foliorum  
Microbacterium foliorum  
Microbacterium paraoxydans  
Microbacterium foliorum  
Microbacterium foliorum  
Streptomyces scabiei  
Streptomyces scabiei  
Streptococcus porci  
Streptococcus constellatus  
Streptococcus equi  
Faecalibacterium prausnitzii  
Unknown  
Unknown  
Unknown  
Unknown  
Unknown  
Arthrobacter sp. ATCC 21022  
Propionibacterium freudenreichii  
Propionibacterium freudenreichii  
Propionibacterium freudenreichii  
Corynebacterium pseudotuberculosis  
Pasteurella multocida  
Rhodococcus erythropolis  
Gordonia malaquae  
Gordonia rubripertincta  
Streptococcus uberis  
Erysipelothrix rhusiopathiae

Lactobacillus fermentum  
Lactobacillus gasseri  
Lactobacillus johnsonii  
Propionibacterium freudenreichii  
Propionibacterium freudenreichii  
Propionibacterium freudenreichii  
Microbacterium foliorum  
Microbacterium foliorum  
Thermoanaerobacterium saccharolyticum  
Streptococcus constellatus  
Bacillus pumilus  
Clostridium perfringens  
Clostridium perfringens  
Lactobacillus brevis  
Lactobacillus brevis  
Lactobacillus brevis  
Lactobacillus jensenii  
Arthrobacter globiformis  
Enterococcus faecalis  
Lactobacillus plantarum  
Faecalibacterium prausnitzii  
Clostridium tyrobutyricum  
Paenibacillus polymyxa  
Geobacillus stearothermophilus  
Unknown  
Unknown  
Unknown  
Microbacterium foliorum  
Microbacterium foliorum  
Microbacterium paraoxydans  
Microbacterium foliorum  
Microbacterium paraoxydans  
Microbacterium foliorum  
Microbacterium paraoxydans  
Arthrobacter globiformis  
Arthrobacter globiformis  
Arthrobacter globiformis  
Arthrobacter globiformis  
Microcystis aeruginosa  
Bacillus pumilus  
Bacillus thuringiensis  
Unknown  
Planktothrix agardhii  
Pontimonas salivibrio  
Rhodococcus hoagii  
Paeniglutamicibacter sulfureus

Paeniglutamicibacter sulfureus  
Arthrobacter sp. ATCC 21022  
Arthrobacter globiformis  
Arthrobacter globiformis  
Sinomonas atrocyanea  
Arthrobacter globiformis  
Arthrobacter globiformis  
Arthrobacter globiformis  
Arthrobacter sp.  
Arthrobacter globiformis  
Microbacterium paraoxydans  
Microbacterium oxydans  
Brevibacterium fuscum  
Xanthomonas citri  
Thermus thermophilus  
Meiothermus sp.  
Thermus thermophilus  
Lactobacillus plantarum  
Lactobacillus plantarum  
Lactobacillus delbrueckii  
Lactobacillus delbrueckii  
Weissella ceti  
Lactobacillus brevis  
Rhizobium etli  
Rhizobium etli  
Erwinia amylovora  
Cronobacter sakazakii  
Erwinia amylovora  
Erwinia amylovora  
Erwinia amylovora  
Erwinia amylovora  
Vibrio alginolyticus  
Erwinia amylovora  
Serratia marcescens  
Serratia marcescens  
Microbacterium foliorum  
Thermobifida fusca  
Thermobifida fusca  
Bacillus sp. (in: Bacteria)  
Bacillus bogoriensis  
Bacillus megaterium  
Exiguobacterium alkaliphilum  
Pelagibaca abyssi  
Sphingobium sp. IP1  
Ruegeria pomeroyi  
Ruegeria pomeroyi

Paracoccus marcusii  
Roseobacter denitrificans  
Roseobacter denitrificans  
Vibrio sp. F13  
Unknown  
Vibrio sp. YD21  
Vibrio maritimus  
Alteromonas sp.  
Vibrio cyclitrophicus  
Pseudomonas syringae  
Flavobacterium psychrophilum  
Pseudomonas syringae  
Unknown  
Arthrobacter globiformis  
Arthrobacter globiformis  
Arthrobacter sp. ATCC 21022  
Arthrobacter sp. ATCC 21022  
Bacillus pseudofirmus  
Bacillus cereus  
Unknown  
Brevibacillus laterosporus  
Arthrobacter globiformis  
Unknown  
Unknown  
Synechococcus sp.  
Synechococcus sp.  
Unknown  
Streptomyces lividans  
Streptomyces lividans  
Streptomyces sp.  
Unknown  
Unknown  
Unknown  
Unknown  
Unknown  
Synechococcus sp.  
Synechococcus sp. CB0101  
Lactococcus garvieae  
Unknown  
Croceibacter atlanticus  
Prochlorococcus marinus  
Synechococcus sp. CB0204  
Synechococcus sp. WH 7803  
Unknown  
Brevibacterium iodinum  
Clostridioides difficile

Streptomyces lividans  
Dinoroseobacter shibae  
Unknown  
Pseudomonas syringae  
Pseudomonas aeruginosa  
Clavibacter michiganensis  
Xylella fastidiosa  
Pseudomonas syringae  
Pseudomonas syringae  
Unknown  
Bifidobacterium thermophilum  
Yersinia enterocolitica  
Thermus thermophilus  
Thermus thermophilus  
Lactobacillus rhamnosus  
Staphylococcus epidermidis  
Unknown  
Unknown  
Unknown  
Unknown  
Xanthomonas euvesicatoria  
Tetrasphaera jenkinsii  
Citromicrobium sp. RCC1878  
Aerococcus viridans  
Bacillus cereus  
Unknown  
Faecalibacterium prausnitzii  
Unknown  
Unknown  
Unknown  
Faecalibacterium prausnitzii  
Unknown  
Unknown  
Bacillus sp. (in: Bacteria)  
Unknown  
Rathayibacter toxicus  
Arthrobacter sp. ATCC 21022  
Enterococcus faecalis  
Streptococcus sp. 'group C'  
Enterococcus faecalis
